# Supplementary material for: Propofol-based deep sedation for colonoscopy: does sufentanil, alfentanil or ketamine help? A propensity score weighted retrospective study
Source: PeerJ. 2025 Mar 10;13:e19146. doi: 10.7717/peerj.19146 (PMC11905911; doi:10.7717/peerj.19146)
Supplement: Supplemental Information 1 [file peerj-13-19146-s001.xlsx]

## Sheet: Sheet1
MeanHr	MaxHr	MinHr	DeltaHr	MeanSpo2	MaxSpo2	MinSpo2	DeltaSpo2	MeanRr	MaxRr	MinRr	DeltaRr	MeanBpM	MaxBpM	MinBpM	DeltaBpM	Propofol 1%(ml)	ketamine(mg)	sufenta(mcg)	alfentanil(mg)	asa	weight(g)	Height(mm)	age	gastroscopy	endoscopy duration	group	bmi	sex	Weights	Length of stay(hours)	MALLAMPATI	Hypertension	Ischemic cardiopathy	COPD	Obstructive sleep apnea syndrome	Tobacco use	biopsy	polypectomy	Mallampati >2	Hypoxemia	hypotension	bradycardia	tachycardia	hypertension
86	95	80	15	92	96	83	13	13	39	1	38	90	103	81	22	10	0	0	0.5	2	98000	1700	49	1	0.9	2	33.91	1	0.271618	2.62	3	1	0	0	0	0	1	0	TRUE	TRUE	FALSE	FALSE	FALSE	FALSE
102	116	94	22	99	100	94	6	17	30	3	27	91	104	72	32	10	0	0	0.5	2	110000	1750	52	0	0.32	2	35.9184	0	1.34736	3.10333	2	0	0	0	0	0	1	0	FALSE	FALSE	FALSE	FALSE	FALSE	FALSE
79	98	69	29	99	100	98	2	16	35	2	33	78	90	73	17	10	0	0	0	2	101000	1800	46	0	0.32	0	31.1728	0	0.990074	1.85333	2	0	0	0	0	0	1	0	FALSE	FALSE	FALSE	FALSE	FALSE	FALSE
84	97	72	25	100	100	100	0	16	29	2	27	78	88	68	20	20	0	0	0	2	65000	1670	50	0	0.52	0	23.3067	1	1.01082	2.03333	2	0	0	1	0	1	1	0	FALSE	FALSE	FALSE	FALSE	FALSE	FALSE
63	82	58	24	99	100	82	18	11	36	2	34	67	85	53	32	10	0	0	0.5	2	87000	1710	46	1	0.5	2	29.7527	1	0.277232	2.29667	4	0	0	0	0	0	1	0	TRUE	TRUE	TRUE	FALSE	FALSE	FALSE
68	80	60	20	99	100	97	3	10	21	2	19	67	75	61	14	10	0	0	0	2	75000	1580	70	0	0.42	0	30.0433	1	0.974955	1.73667	2	1	0	0	0	0	1	0	FALSE	FALSE	FALSE	FALSE	FALSE	FALSE
95	141	84	57	99	100	94	6	19	29	3	26	63	114	44	70	30	0	0	0	2	63000	1580	61	1	0.85	0	25.2363	0	1.16357	1.57	3	1	1	1	0	0	1	0	TRUE	FALSE	TRUE	FALSE	TRUE	TRUE
72	91	66	25	99	100	96	4	18	26	1	25	57	61	55	6	90	0	0	0	2	72000	1600	74	0	0.82	0	28.125	0	0.974787	3.25333	2	1	0	0	0	0	1	0	FALSE	FALSE	TRUE	FALSE	FALSE	FALSE
79	92	71	21	100	100	100	0	14	27	1	26	83	123	59	64	50	0	0	0	2	88000	1750	50	0	0.4	0	28.7347	1	1.00804	2.09667	1	0	0	0	0	0	NA	NA	FALSE	FALSE	FALSE	FALSE	FALSE	TRUE
64	74	53	21	99	100	98	2	20	30	2	28	94	112	80	32	50	0	0	0	2	84000	1750	53	0	0.75	0	27.4286	0	0.973133	1.43333	2	1	0	0	0	0	0	0	FALSE	FALSE	FALSE	FALSE	FALSE	TRUE
77	89	62	27	94	100	84	16	24	34	1	33	77	105	67	38	150	0	0	0	2	110000	1700	72	0	0.83	0	38.0623	0	0.996939	2.76333	1	1	1	1	0	0	0	0	FALSE	TRUE	FALSE	FALSE	FALSE	TRUE
87	94	78	16	100	100	100	0	11	29	1	28	74	79	69	10	50	0	0	0	2	100000	1770	66	0	0.26	0	31.9193	0	0.983814	1.81333	1	1	0	0	0	1	0	0	FALSE	FALSE	FALSE	FALSE	FALSE	FALSE
77	113	64	49	100	100	100	0	16	45	2	43	66	96	54	42	50	0	0	0	2	84000	1810	46	1	0.48	0	25.6402	0	1.0853	2.45	1	0	0	0	0	0	0	0	FALSE	FALSE	TRUE	FALSE	FALSE	FALSE
67	87	58	29	100	100	100	0	14	30	2	28	69	79	60	19	100	0	0	0	2	74000	1800	48	0	0.57	0	22.8395	0	0.964583	2.41667	1	0	0	1	0	0	0	0	FALSE	FALSE	FALSE	FALSE	FALSE	FALSE
79	106	68	38	100	100	100	0	17	30	2	28	63	86	52	34	70	0	0	0	2	70000	1740	25	0	0.35	0	23.1206	1	1.04662	1.83667	3	0	0	0	0	0	0	0	TRUE	FALSE	TRUE	FALSE	FALSE	FALSE
73	92	63	29	99	100	99	1	12	38	7	31	74	93	67	26	50	0	0	0	2	74000	1640	30	0	0.35	0	27.5134	0	0.99768	2.35	1	0	0	0	0	0	0	0	FALSE	FALSE	FALSE	FALSE	FALSE	FALSE
89	107	66	41	99	100	97	3	18	35	3	32	57	62	53	9	100	0	0	0	2	75000	1720	29	1	0.6	0	25.3515	1	1.02137	3.46667	1	0	0	0	0	1	0	0	FALSE	FALSE	TRUE	FALSE	FALSE	FALSE
85	111	64	47	100	100	100	0	19	38	2	36	83	102	37	65	100	0	0	0	2	75000	1690	46	1	0.4	0	26.2596	0	1.08433	2.45333	1	1	0	0	0	0	1	1	FALSE	FALSE	TRUE	FALSE	FALSE	FALSE
78	87	62	25	100	100	100	0	18	29	2	27	90	118	80	38	50	0	0	0	2	83000	1890	42	0	0.25	0	23.2356	0	0.943098	1.88667	3	0	0	0	0	1	1	0	TRUE	FALSE	FALSE	FALSE	FALSE	TRUE
91	105	79	26	99	100	96	4	24	30	2	28	53	63	47	16	50	0	0	0	2	98000	1830	66	1	0.35	0	29.2633	0	1.05987	2.59667	1	0	0	0	0	0	1	1	FALSE	FALSE	TRUE	FALSE	FALSE	FALSE
52	59	50	9	99	100	99	1	15	29	2	27	54	71	44	27	50	0	0	0	2	73000	1700	70	0	0.4	0	25.2595	0	0.969562	2.06667	3	1	0	1	0	1	1	1	TRUE	FALSE	TRUE	TRUE	FALSE	FALSE
74	94	57	37	100	100	100	0	17	27	2	25	68	77	62	15	60	0	0	0	2	104000	1820	36	0	0.32	0	31.3972	1	1.02246	1.28333	1	0	0	0	0	0	0	0	FALSE	FALSE	FALSE	FALSE	FALSE	FALSE
85	99	81	18	100	100	100	0	15	40	2	38	71	91	61	30	30	0	0	0	2	102000	1730	59	0	0.3	0	34.0807	0	0.992714	1.05	NA	1	1	1	0	0	0	0	NA	FALSE	FALSE	FALSE	FALSE	FALSE
79	84	73	11	99	100	98	2	20	28	8	20	54	78	49	29	70	0	0	0	2	80000	1700	69	0	0.57	0	27.6817	0	0.972058	3.82	1	1	0	0	0	0	0	0	FALSE	FALSE	TRUE	FALSE	FALSE	FALSE
62	70	58	12	100	100	100	0	18	27	2	25	84	107	76	31	40	0	0	0	2	102000	1760	54	0	0.2	0	32.9287	1	1.00344	3.12	1	0	0	0	0	0	0	0	FALSE	FALSE	FALSE	FALSE	FALSE	TRUE
95	114	72	42	100	100	100	0	18	36	2	34	61	66	55	11	80	0	0	0	2	78000	1690	22	0	0.32	0	27.31	1	1.05048	2.3	1	0	0	0	0	0	0	0	FALSE	FALSE	TRUE	FALSE	FALSE	FALSE
89	109	83	26	99	100	89	11	22	39	2	37	86	110	71	39	90	0	0	0	2	75000	1760	51	0	0.79	0	24.2123	1	1.00882	1.53667	2	0	0	0	0	0	0	0	FALSE	TRUE	FALSE	FALSE	FALSE	TRUE
56	79	47	32	100	100	100	0	15	25	1	24	79	94	62	32	30	0	0	0	2	67000	1820	66	0	0.8	0	20.227	0	0.952821	2.63667	1	1	0	0	0	0	0	0	FALSE	FALSE	FALSE	TRUE	FALSE	FALSE
68	79	52	27	100	100	100	0	18	34	1	33	68	91	45	46	8	0	0	0	2	64000	1580	54	0	0.54	0	25.6369	1	1.00525	2.78667	2	1	0	0	0	0	0	0	FALSE	FALSE	TRUE	FALSE	FALSE	FALSE
81	96	64	32	99	100	97	3	17	43	1	42	74	107	51	56	9	0	0	0	2	91000	1740	72	0	0.45	0	30.0568	0	0.977472	2.37	1	1	1	0	0	0	0	0	FALSE	FALSE	TRUE	FALSE	FALSE	TRUE
91	112	73	39	99	100	95	5	12	37	2	35	73	102	58	44	14	0	0	0	2	62000	1680	76	0	1.33	0	21.9671	0	0.961756	2.25	3	0	0	0	0	0	1	0	TRUE	FALSE	FALSE	FALSE	FALSE	FALSE
64	71	61	10	100	100	100	0	11	26	2	24	64	69	61	8	30	0	5	0	2	64000	1720	51	0	0.6	1	21.6333	1	0.804767	2.65	2	0	0	0	0	1	0	0	FALSE	FALSE	FALSE	FALSE	FALSE	FALSE
70	88	64	24	100	100	100	0	7	34	2	32	59	82	43	39	20	0	5	0	2	57000	1630	76	1	0.46	1	21.4536	1	1.4397	2.79667	2	0	0	0	0	0	0	0	FALSE	FALSE	TRUE	FALSE	FALSE	FALSE
78	124	65	59	99	100	95	5	14	33	2	31	86	110	69	41	50	0	5	0	2	78000	1650	67	0	0.79	1	28.6501	1	0.945047	2.10333	1	1	0	0	0	0	0	0	FALSE	FALSE	FALSE	FALSE	TRUE	TRUE
68	102	54	48	99	100	98	2	10	23	2	21	63	82	44	38	50	0	3	0	2	87000	1700	71	0	0.43	1	30.1038	0	1.00299	1.04667	NA	1	0	1	0	0	0	0	NA	FALSE	TRUE	FALSE	FALSE	FALSE
69	87	52	35	99	100	98	2	18	26	1	25	65	86	46	40	50	0	0	0	2	62000	1650	57	0	0.65	0	22.7732	1	0.999379	2.48667	1	1	0	0	0	0	0	0	FALSE	FALSE	TRUE	FALSE	FALSE	FALSE
89	105	75	30	99	100	97	3	17	28	1	27	68	72	62	10	50	0	0	0	2	87000	1810	42	0	0.47	0	26.556	0	0.978193	2.58333	1	0	0	1	0	0	0	0	FALSE	FALSE	FALSE	FALSE	FALSE	FALSE
95	132	79	53	100	100	100	0	22	55	2	53	73	85	60	25	100	0	0	0	2	71000	1500	16	1	0.79	0	31.5556	1	1.30231	2.33667	3	0	0	0	0	0	0	0	TRUE	FALSE	FALSE	FALSE	TRUE	FALSE
89	94	87	7	100	100	100	0	17	19	16	3	55	55	55	0	50	0	0	0	2	55000	1680	32	0	0.47	0	19.487	1	1.04297	2.12	1	0	0	0	0	0	0	0	FALSE	FALSE	TRUE	FALSE	FALSE	FALSE
106	136	98	38	99	100	99	1	13	24	2	22	83	89	76	13	10	0	0	0	2	85000	1730	43	0	0.28	0	28.4005	0	0.98189	1.79667	2	0	0	0	0	1	1	0	FALSE	FALSE	FALSE	FALSE	TRUE	FALSE
68	78	60	18	99	100	96	4	15	32	2	30	70	78	64	14	50	0	0	0	2	83000	1800	61	1	0.45	0	25.6173	0	0.970447	2.57	1	1	0	0	1	0	1	0	FALSE	FALSE	FALSE	FALSE	FALSE	FALSE
91	108	78	30	99	100	96	4	17	28	2	26	109	118	100	18	50	0	0	0	2	75000	1550	58	0	0.3	0	31.2175	1	0.999882	2.43333	2	0	0	0	0	1	1	0	FALSE	FALSE	FALSE	FALSE	FALSE	TRUE
67	77	61	16	99	100	96	4	11	26	2	24	70	84	61	23	50	0	0	0	2	71000	1600	71	0	0.47	0	27.7344	1	0.958505	1.98667	3	1	0	0	0	0	1	0	TRUE	FALSE	FALSE	FALSE	FALSE	FALSE
67	79	58	21	99	100	99	1	15	48	2	46	71	84	64	20	70	0	0	0	2	82000	1760	72	0	1.27	0	26.4721	0	0.968106	2.3	2	0	0	1	0	1	1	0	FALSE	FALSE	FALSE	FALSE	FALSE	FALSE
61	76	53	23	98	100	94	6	15	31	3	28	77	82	70	12	10	0	5	0	2	61000	1580	63	1	0.5	1	24.4352	1	1.48727	3.47	NA	1	0	0	0	0	1	0	NA	FALSE	FALSE	FALSE	FALSE	FALSE
69	89	50	39	96	98	91	7	9	23	2	21	80	96	70	26	10	0	5	0	2	71000	1750	46	1	0.33	1	23.1837	0	1.33382	2.91667	1	0	0	0	0	0	0	0	FALSE	FALSE	FALSE	TRUE	FALSE	FALSE
77	118	64	54	98	99	89	10	12	27	2	25	51	69	38	31	50	0	5	0	2	83000	1500	80	1	0.63	1	36.8889	1	0.623106	2.49667	3	1	0	0	0	0	1	1	TRUE	TRUE	TRUE	FALSE	FALSE	FALSE
73	80	66	14	99	100	97	3	16	20	2	18	90	99	82	17	10	0	5	0	2	76000	1600	63	0	0.43	1	29.6875	1	0.902121	1.86333	1	0	0	0	0	1	1	1	FALSE	FALSE	FALSE	FALSE	FALSE	FALSE
56	77	49	28	98	100	88	12	5	26	2	24	68	91	54	37	10	0	5	0	2	88000	1760	53	1	0.45	1	28.4091	1	0.723764	0.98	NA	NA	NA	NA	NA	NA	0	0	NA	TRUE	TRUE	TRUE	FALSE	FALSE
70	85	48	37	94	100	87	13	30	65	2	63	88	105	79	26	50	0	0	0	2	83000	1580	47	1	0.38	0	33.2479	0	1.07154	0.93	1	0	0	0	0	NA	1	0	FALSE	TRUE	FALSE	TRUE	FALSE	TRUE
80	95	76	19	99	100	98	2	12	17	1	16	80	99	69	30	40	0	0	0	2	77000	1750	57	0	0.52	0	25.1429	0	0.965646	1.98333	1	0	0	0	0	0	1	0	FALSE	FALSE	FALSE	FALSE	FALSE	FALSE
74	90	61	29	99	100	97	3	12	32	2	30	81	98	68	30	40	0	0	0	2	92000	1710	38	1	0.25	0	31.4627	1	0.999795	1.81667	2	0	0	0	0	0	0	0	FALSE	FALSE	FALSE	FALSE	FALSE	FALSE
79	88	73	15	100	100	100	0	12	23	2	21	81	107	72	35	25	0	0	0	2	98000	1700	67	0	0.2	0	33.91	1	0.982765	1.54667	1	0	0	1	0	0	1	0	FALSE	FALSE	FALSE	FALSE	FALSE	TRUE
63	73	46	27	97	99	88	11	16	30	2	28	77	92	70	22	60	0	0	0	2	39000	640	66	1	0.65	0	95.2148	0	1.03197	2.01333	2	0	0	0	0	1	0	0	FALSE	TRUE	FALSE	TRUE	FALSE	FALSE
67	75	58	17	96	100	92	8	9	23	2	21	88	94	82	12	80	0	0	0.5	2	82000	1790	57	1	0.93	2	25.5922	0	0.25019	2.11667	3	0	0	0	0	0	1	0	TRUE	FALSE	FALSE	FALSE	FALSE	FALSE
53	62	41	21	100	100	100	0	12	19	2	17	62	76	55	21	30	0	0	0	2	68000	1600	87	0	0.31	0	26.5625	0	0.981759	0.396667	3	0	0	0	0	0	1	0	TRUE	FALSE	TRUE	TRUE	FALSE	FALSE
86	104	80	24	99	100	99	1	15	31	2	29	75	85	64	21	50	0	0	0	2	84000	1850	44	0	0.23	0	24.5435	0	0.946731	3.31333	3	1	0	1	0	0	0	0	TRUE	FALSE	FALSE	FALSE	FALSE	FALSE
55	70	51	19	100	100	100	0	10	21	1	20	50	54	47	7	50	0	0	0	2	90000	1700	60	0	0.43	0	31.1419	0	0.985469	3.16333	2	1	0	1	0	0	1	0	FALSE	FALSE	TRUE	FALSE	FALSE	FALSE
74	88	63	25	98	100	95	5	10	32	1	31	62	90	43	47	150	0	0	0	2	94000	1800	53	1	1.07	0	29.0123	0	1.07023	4.45	2	0	0	0	0	0	1	1	FALSE	FALSE	TRUE	FALSE	FALSE	FALSE
77	96	61	35	100	100	100	0	17	33	1	32	71	95	53	42	50	0	0	0	2	88000	1620	39	1	0.59	0	33.5315	1	0.99602	2.78667	1	1	0	0	0	0	0	0	FALSE	FALSE	TRUE	FALSE	FALSE	FALSE
67	85	62	23	99	100	99	1	15	38	1	37	58	96	46	50	50	0	0	0	2	80000	1700	62	1	0.55	0	27.6817	0	1.06027	2.03667	1	0	0	0	0	1	NA	NA	FALSE	FALSE	TRUE	FALSE	FALSE	FALSE
58	72	44	28	99	100	98	2	15	27	2	25	73	98	61	37	50	0	0	0	2	85000	1830	41	1	0.63	0	25.3815	0	1.09346	1.99667	1	0	0	0	0	1	0	0	FALSE	FALSE	FALSE	TRUE	FALSE	FALSE
73	87	68	19	99	100	95	5	20	25	8	17	75	88	65	23	50	0	0	0	2	84000	1850	86	0	0.53	0	24.5435	0	0.95776	4.01333	2	1	0	0	0	0	0	1	FALSE	FALSE	FALSE	FALSE	FALSE	FALSE
58	65	52	13	99	100	96	4	13	28	1	27	95	108	81	27	50	0	0	0	2	53000	1570	85	1	0.44	0	21.5019	1	0.948151	3.82	2	1	0	0	0	0	0	0	FALSE	FALSE	FALSE	FALSE	FALSE	TRUE
94	106	81	25	98	100	95	5	18	33	1	32	92	103	81	22	50	0	0	0	2	131000	1920	67	0	0.22	0	35.536	0	0.991001	2.68333	1	0	0	0	0	NA	0	0	FALSE	FALSE	FALSE	FALSE	FALSE	FALSE
72	85	63	22	98	100	98	2	24	34	7	27	52	61	40	21	100	0	0	0	2	80000	1680	60	0	0.73	0	28.3447	1	0.998489	4.33	1	1	0	0	0	0	1	1	FALSE	FALSE	TRUE	FALSE	FALSE	FALSE
75	90	64	26	100	100	100	0	13	23	1	22	58	101	33	68	50	0	0	0	2	80000	1750	51	0	0.35	0	26.1224	0	0.97014	3.48	2	0	0	0	0	0	0	0	FALSE	FALSE	TRUE	FALSE	FALSE	FALSE
76	113	65	48	96	100	90	10	15	30	2	28	69	94	55	39	100	0	0	0	2	85000	1630	58	1	0.8	0	31.9922	1	0.999736	2.85	1	1	0	0	0	0	0	0	FALSE	TRUE	TRUE	FALSE	FALSE	FALSE
65	83	56	27	100	100	100	0	13	20	2	18	58	67	50	17	100	0	0	0	2	70000	1550	86	0	0.61	0	29.1363	1	0.941955	1.74667	NA	NA	NA	NA	NA	NA	1	0	NA	FALSE	TRUE	FALSE	FALSE	FALSE
62	87	40	47	100	100	100	0	23	40	1	39	74	121	55	66	70	20	0	0	2	62000	1750	51	0	0.93	3	20.2449	0	0.928354	5.98333	1	0	0	0	0	1	1	1	FALSE	FALSE	TRUE	TRUE	FALSE	TRUE
89	104	40	64	99	100	96	4	22	43	1	42	66	116	45	71	145	20	0	0	2	68000	1560	64	0	1.37	3	27.9421	1	1.42618	4.05	4	0	0	0	0	0	1	1	TRUE	FALSE	TRUE	TRUE	FALSE	TRUE
94	108	78	30	99	100	98	2	20	36	2	34	75	89	68	21	20	0	0	0	2	72000	1700	57	1	0.57	0	24.9135	0	1.06167	1.88667	2	0	0	0	0	0	0	0	FALSE	FALSE	FALSE	FALSE	FALSE	FALSE
75	99	54	45	99	100	96	4	12	27	2	25	81	104	73	31	10	0	0	0	2	70000	1750	62	0	0.8	0	22.8571	0	0.959412	1.68667	1	0	1	1	0	1	1	1	FALSE	FALSE	FALSE	FALSE	FALSE	FALSE
63	91	55	36	99	100	94	6	13	28	2	26	54	70	47	23	50	0	0	0	2	62000	1700	62	0	0.59	0	21.4533	0	0.956437	1.98667	1	0	0	0	0	NA	1	1	FALSE	FALSE	TRUE	FALSE	FALSE	FALSE
84	102	66	36	99	100	96	4	19	38	1	37	61	93	30	63	60	0	0	0	2	95000	1700	58	1	0.65	0	32.872	1	0.998542	2.98333	1	1	0	1	0	1	0	0	FALSE	FALSE	TRUE	FALSE	FALSE	FALSE
91	102	82	20	99	100	97	3	24	38	2	36	87	98	78	20	75	20	0	0	2	75000	1500	49	0	0.35	3	33.3333	0	0.791636	2.08667	1	0	0	0	0	0	1	0	FALSE	FALSE	FALSE	FALSE	FALSE	FALSE
71	96	59	37	99	100	98	2	16	39	2	37	76	83	66	17	30	20	0	0	2	70000	1500	67	0	0.35	3	31.1111	1	0.89219	2.26667	NA	0	0	0	0	0	0	0	NA	FALSE	FALSE	FALSE	FALSE	FALSE
98	107	94	13	95	96	91	5	21	64	2	62	64	98	43	55	30	0	0	0	2	75000	1650	59	1	0.36	0	27.5482	0	1.06148	1.04667	2	0	1	0	0	0	0	0	FALSE	FALSE	TRUE	FALSE	FALSE	FALSE
61	72	55	17	99	100	97	3	17	38	2	36	67	76	61	15	50	0	0	0	2	73000	1590	73	0	0.5	0	28.8754	1	0.96693	3.53667	2	1	0	0	0	0	1	1	FALSE	FALSE	FALSE	FALSE	FALSE	FALSE
80	98	61	37	99	100	98	2	11	38	1	37	60	82	51	31	50	0	0	0	2	72000	1670	58	1	0.82	0	25.8166	1	0.995415	4.78333	2	0	0	0	0	0	1	1	FALSE	FALSE	TRUE	FALSE	FALSE	FALSE
73	86	32	54	99	100	97	3	15	20	10	10	62	68	56	12	50	0	0	0	2	53000	1550	56	0	0.43	0	22.0604	1	0.999269	2.43333	1	0	0	0	0	1	1	0	FALSE	FALSE	FALSE	TRUE	FALSE	FALSE
75	85	67	18	97	100	71	29	17	34	2	32	60	82	45	37	50	0	0	0	2	71000	1620	63	1	0.55	0	27.0538	1	0.991444	1.75333	2	0	0	1	0	0	0	0	FALSE	TRUE	TRUE	FALSE	FALSE	FALSE
63	79	59	20	99	100	98	2	20	28	3	25	82	99	70	29	50	0	0	0	2	98000	1830	60	0	0.43	0	29.2633	0	0.97708	1.53	2	1	0	0	0	0	1	1	FALSE	FALSE	FALSE	FALSE	FALSE	FALSE
75	88	61	27	99	100	97	3	18	31	2	29	69	90	58	32	50	0	0	0	2	58000	1520	57	0	0.4	0	25.1039	1	1.00342	1.80333	2	0	0	0	0	1	0	1	FALSE	FALSE	FALSE	FALSE	FALSE	FALSE
69	82	62	20	100	100	100	0	23	29	2	27	76	94	56	38	50	0	0	0	2	62000	1600	70	0	0.5	0	24.2188	1	0.969173	1.99667	1	0	0	1	0	1	0	0	FALSE	FALSE	FALSE	FALSE	FALSE	FALSE
73	85	59	26	98	100	83	17	12	25	2	23	80	91	71	20	50	0	0	0	2	91000	1830	58	1	0.47	0	27.1731	0	1.06137	2.42	1	1	0	0	0	0	1	0	FALSE	TRUE	FALSE	FALSE	FALSE	FALSE
80	100	70	30	99	100	97	3	13	34	1	33	80	85	76	9	17	0	0	0	2	101000	1950	56	0	0.7	0	26.5615	0	0.969852	2.13667	1	0	0	0	0	0	1	0	FALSE	FALSE	FALSE	FALSE	FALSE	FALSE
60	74	53	21	99	100	89	11	7	19	1	18	64	74	57	17	9	0	0	0	2	55000	1650	60	1	0.55	0	20.202	1	0.978619	2.68	2	0	0	0	0	0	1	0	FALSE	TRUE	FALSE	FALSE	FALSE	FALSE
106	127	84	43	100	100	100	0	13	29	1	28	69	86	54	32	9	0	0	0	2	66000	1660	79	0	0.69	0	23.9512	0	0.956744	2.10333	1	1	0	0	0	0	1	0	FALSE	FALSE	TRUE	FALSE	TRUE	FALSE
85	99	69	30	100	100	100	0	15	26	1	25	90	100	82	18	22	0	0	0	2	82000	1750	45	0	0.5	0	26.7755	1	1.01588	1.43333	1	0	0	0	0	0	1	0	FALSE	FALSE	FALSE	FALSE	FALSE	FALSE
79	106	66	40	100	100	100	0	7	18	2	16	72	81	65	16	30	0	0	0	2	73000	1700	71	0	0.23	0	25.2595	1	0.967788	2.41667	2	0	0	0	0	1	0	0	FALSE	FALSE	FALSE	FALSE	FALSE	FALSE
62	68	55	13	99	100	78	22	21	29	9	20	88	88	88	0	20	0	0	0	2	64000	1610	79	0	0.67	0	24.6904	0	0.930123	1.42	NA	NA	NA	NA	NA	NA	0	1	NA	TRUE	FALSE	FALSE	FALSE	FALSE
66	89	60	29	99	100	96	4	10	50	2	48	81	96	67	29	8	0	0	0	2	75000	1710	73	0	0.5	0	25.6489	0	0.965267	1.72	1	1	1	0	0	0	1	0	FALSE	FALSE	FALSE	FALSE	FALSE	FALSE
79	91	68	23	99	100	97	3	12	44	2	42	82	95	73	22	10	0	0	0	2	85000	1870	64	0	0.5	0	24.3072	0	0.962441	1.52	1	0	0	0	0	0	1	0	FALSE	FALSE	FALSE	FALSE	FALSE	FALSE
80	87	72	15	89	100	71	29	9	77	1	76	85	93	78	15	50	0	0	0	2	52000	1650	53	1	0.82	0	19.1001	1	0.988299	1.75	2	1	0	1	0	0	0	0	FALSE	TRUE	FALSE	FALSE	FALSE	FALSE
66	74	61	13	100	100	100	0	13	29	2	27	69	76	63	13	50	0	0	0	2	53000	1600	80	0	0.31	0	20.7031	1	0.94269	1.96333	2	0	0	0	0	0	1	0	FALSE	FALSE	FALSE	FALSE	FALSE	FALSE
69	83	62	21	99	100	99	1	14	30	1	29	80	97	67	30	50	0	0	0	2	67000	1600	86	0	0.45	0	26.1719	1	0.942938	1.71333	1	1	0	0	0	0	1	0	FALSE	FALSE	FALSE	FALSE	FALSE	FALSE
69	74	56	18	99	100	93	7	14	27	2	25	70	73	68	5	50	0	0	0	2	58000	1580	79	0	0.28	0	23.2335	1	0.947123	1.11333	2	0	0	0	0	NA	1	0	FALSE	FALSE	FALSE	FALSE	FALSE	FALSE
72	92	65	27	96	99	94	5	12	43	2	41	84	102	71	31	50	0	0	0	2	90000	1700	47	1	0.37	0	31.1419	0	1.07532	2.58667	1	1	0	0	0	0	0	0	FALSE	FALSE	FALSE	FALSE	FALSE	FALSE
65	72	59	13	99	100	95	5	12	34	2	32	90	106	78	28	50	0	0	0	2	107000	1800	60	0	0.57	0	33.0247	0	1.02006	2.23667	3	1	0	0	1	0	1	1	TRUE	FALSE	FALSE	FALSE	FALSE	TRUE
92	101	77	24	97	100	92	8	19	50	2	48	72	86	63	23	100	0	0	0	2	110000	1800	62	0	0.43	0	33.9506	0	0.982419	3.06667	3	0	0	0	0	0	1	1	TRUE	FALSE	FALSE	FALSE	FALSE	FALSE
57	66	50	16	97	99	95	4	17	29	2	27	72	81	61	20	50	0	0	0	2	101000	1730	63	0	0.31	0	33.7465	0	0.98938	2.49667	1	1	0	1	0	0	0	0	FALSE	FALSE	FALSE	TRUE	FALSE	FALSE
64	80	31	49	99	100	94	6	16	31	2	29	66	76	62	14	30	0	0	0	2	80000	1550	35	0	0.38	0	33.2986	1	1.02064	2.5	2	1	0	0	0	0	1	0	FALSE	FALSE	FALSE	TRUE	FALSE	FALSE
100	121	70	51	99	100	87	13	16	31	1	30	73	78	68	10	50	13	0	0	2	80000	1600	23	1	0.32	3	31.25	1	1.19579	1.88667	1	0	0	0	0	0	1	0	FALSE	TRUE	FALSE	FALSE	TRUE	FALSE
78	90	69	21	99	100	97	3	13	36	2	34	86	102	76	26	50	0	0	0	2	85000	1790	73	0	0.39	0	26.5285	0	0.968524	2.08667	1	0	0	0	0	0	1	0	FALSE	FALSE	FALSE	FALSE	FALSE	FALSE
66	83	62	21	99	100	95	5	17	44	2	42	85	94	79	15	100	0	0	0	2	105000	1780	57	0	0.66	0	33.1398	0	0.974738	1.93	4	1	0	0	0	0	1	0	TRUE	FALSE	FALSE	FALSE	FALSE	FALSE
81	102	62	40	98	100	95	5	14	53	2	51	79	85	71	14	50	0	0	0	2	76000	1650	63	1	0.39	0	27.9155	1	0.99287	1.82	2	0	0	0	0	0	1	0	FALSE	FALSE	FALSE	FALSE	FALSE	FALSE
60	75	53	22	99	100	98	2	12	29	1	28	91	134	73	61	50	0	0	0	2	92000	1840	51	0	0.38	0	27.1739	0	0.973089	2.36333	1	0	0	0	0	0	1	0	FALSE	FALSE	FALSE	FALSE	FALSE	TRUE
79	105	71	34	99	100	99	1	11	42	2	40	86	95	76	19	50	0	0	0	2	53000	1690	71	1	0.41	0	18.5568	0	1.01548	1.76333	1	0	1	0	0	0	1	0	FALSE	FALSE	FALSE	FALSE	FALSE	FALSE
83	112	71	41	99	100	95	5	16	36	2	34	65	89	55	34	50	0	0	0	2	52000	1550	82	1	1.12	0	21.6441	1	0.95302	2.02	2	1	1	0	0	0	1	0	FALSE	FALSE	TRUE	FALSE	FALSE	FALSE
72	79	64	15	100	100	100	0	15	34	1	33	96	96	96	0	10	0	0	0	2	72000	1720	77	0	0.47	0	24.3375	0	0.958726	2.73667	1	1	1	1	0	0	1	0	FALSE	FALSE	FALSE	FALSE	FALSE	FALSE
88	102	66	36	99	100	98	2	15	31	2	29	92	143	75	68	10	0	0	0	2	65000	1670	48	0	0.48	0	23.3067	1	0.985562	2.81333	3	0	0	0	0	0	1	0	TRUE	FALSE	FALSE	FALSE	FALSE	TRUE
61	75	57	18	99	100	95	5	11	16	1	15	87	107	70	37	40	0	0	0	2	88000	1770	55	0	0.58	0	28.089	0	0.974714	3.04667	1	0	0	0	0	1	0	0	FALSE	FALSE	FALSE	FALSE	FALSE	TRUE
68	104	47	57	99	100	86	14	15	44	1	43	72	99	34	65	10	0	0	0	2	65000	1600	23	0	0.44	0	25.3906	1	1.05129	2.38667	1	0	0	0	0	0	1	0	FALSE	TRUE	TRUE	TRUE	FALSE	FALSE
83	114	70	44	100	100	100	0	20	29	2	27	80	119	55	64	20	0	0	0	2	65000	1770	52	0	0.36	0	20.7476	0	0.941835	2.53	3	1	0	0	0	0	1	1	TRUE	FALSE	TRUE	FALSE	FALSE	TRUE
89	107	81	26	100	100	100	0	15	35	1	34	83	96	70	26	10	0	0	0	2	64000	1620	53	0	0.41	0	24.3865	1	1.0062	4.19667	2	0	0	0	0	0	0	1	FALSE	FALSE	FALSE	FALSE	FALSE	FALSE
71	86	65	21	100	100	100	0	14	62	1	61	79	115	58	57	40	0	0	0	2	65000	1520	59	0	0.3	0	28.1337	1	1.00051	2.03667	1	0	0	0	0	NA	0	0	FALSE	FALSE	FALSE	FALSE	FALSE	TRUE
70	81	64	17	99	100	97	3	21	32	8	24	83	101	73	28	9	0	0	0	2	85000	1560	78	0	0.75	0	34.9277	1	0.976465	1.38667	2	1	0	0	0	0	0	0	FALSE	FALSE	FALSE	FALSE	FALSE	FALSE
82	102	73	29	99	100	97	3	21	31	2	29	101	112	92	20	7	0	0	0	2	72000	1760	73	1	0.37	0	23.2438	0	1.07513	1.51667	NA	NA	NA	NA	NA	NA	0	0	NA	FALSE	FALSE	FALSE	FALSE	TRUE
60	77	55	22	99	100	98	2	14	28	2	26	74	101	62	39	10	0	0	0	2	59000	1630	81	0	0.33	0	22.2063	1	0.936821	1.06667	NA	NA	NA	NA	NA	NA	0	0	NA	FALSE	FALSE	FALSE	FALSE	FALSE
94	103	83	20	99	100	96	4	15	26	2	24	82	93	70	23	10	0	0	0	2	80000	1620	58	0	0.43	0	30.4832	1	1.00044	2.11333	2	0	0	0	0	0	1	0	FALSE	FALSE	FALSE	FALSE	FALSE	FALSE
91	98	71	27	100	100	100	0	14	37	2	35	74	115	56	59	29	0	0	0	2	61000	1560	70	0	0.42	0	25.0657	1	0.969946	1.83333	1	1	0	0	0	0	1	0	FALSE	FALSE	FALSE	FALSE	FALSE	TRUE
71	86	55	31	98	100	92	8	15	32	2	30	78	83	75	8	45	0	0	0	2	112000	910	50	0	0.35	0	135.249	0	0.919302	1.96667	1	0	0	0	0	0	1	0	FALSE	FALSE	FALSE	FALSE	FALSE	FALSE
89	103	84	19	99	100	95	5	12	22	2	20	99	113	83	30	10	0	0	0	2	118000	1800	60	0	0.51	0	36.4198	0	0.997921	1.64667	2	1	0	0	0	1	1	0	FALSE	FALSE	FALSE	FALSE	FALSE	TRUE
55	75	49	26	99	100	98	2	13	33	1	32	79	100	66	34	100	0	0	0	2	76000	1740	65	0	0.6	0	25.1024	0	0.964346	2.13667	2	1	1	1	0	0	0	1	FALSE	FALSE	FALSE	TRUE	FALSE	FALSE
77	92	63	29	98	100	97	3	22	60	2	58	61	70	55	15	50	0	0	0	2	69000	1740	34	0	0.58	0	22.7903	0	0.984828	1.81667	1	0	0	0	0	0	1	0	FALSE	FALSE	TRUE	FALSE	FALSE	FALSE
65	96	59	37	97	97	97	0	21	29	1	28	71	81	62	19	50	0	0	0	2	80000	1660	62	0	0.52	0	29.0318	1	0.994242	2.05333	2	1	0	0	0	0	0	0	FALSE	FALSE	FALSE	FALSE	FALSE	FALSE
81	104	63	41	100	100	99	1	16	41	1	40	73	151	57	94	100	0	0	0	2	78000	1680	80	0	1.25	0	27.6361	0	0.969068	1.71333	2	0	1	0	0	0	0	1	FALSE	FALSE	FALSE	FALSE	FALSE	TRUE
70	83	58	25	99	100	99	1	9	51	2	49	85	106	70	36	15	0	5	0	2	64000	1530	65	0	0.45	1	27.3399	1	0.91623	3.43667	2	0	0	0	0	0	0	0	FALSE	FALSE	FALSE	FALSE	FALSE	TRUE
79	90	72	18	96	100	87	13	15	29	1	28	70	82	62	20	20	0	0	0	2	80000	1660	77	1	0.85	0	29.0318	1	1.15357	2.48	3	1	0	0	0	0	1	0	TRUE	TRUE	FALSE	FALSE	FALSE	FALSE
65	74	48	26	99	100	98	2	15	31	2	29	82	100	64	36	10	0	0	0	2	71000	1670	74	0	0.49	0	25.4581	1	0.961229	1.90333	2	0	0	0	0	0	1	0	FALSE	FALSE	FALSE	TRUE	FALSE	FALSE
52	62	45	17	100	100	100	0	18	23	2	21	56	77	44	33	20	0	0	0	2	52000	1620	69	1	0.9	0	19.8141	1	0.967463	1.5	1	0	0	1	0	0	0	0	FALSE	FALSE	TRUE	TRUE	FALSE	FALSE
93	107	59	48	98	100	97	3	14	42	1	41	53	65	43	22	20	0	0	0	2	95000	1820	60	0	0.98	0	28.6801	0	0.975291	4.16333	1	0	0	0	0	0	0	0	FALSE	FALSE	TRUE	FALSE	FALSE	FALSE
61	75	49	26	100	100	100	0	17	35	2	33	72	79	62	17	20	0	0	0	2	72000	1800	24	0	0.68	0	22.2222	0	0.958215	1.75	NA	NA	NA	NA	NA	NA	0	0	NA	FALSE	FALSE	TRUE	FALSE	FALSE
63	87	32	55	100	100	100	0	16	30	2	28	75	75	75	0	10	0	0	0	2	56000	1670	58	0	0.34	0	20.0796	1	0.993403	1.97	1	0	0	0	0	NA	1	0	FALSE	FALSE	FALSE	TRUE	FALSE	FALSE
79	88	70	18	99	100	98	2	12	36	2	34	81	99	68	31	10	0	0	0	2	87000	1820	69	0	0.45	0	26.2649	0	0.966765	1.57	1	1	0	0	0	0	1	0	FALSE	FALSE	FALSE	FALSE	FALSE	FALSE
88	110	79	31	99	100	97	3	11	51	2	49	71	95	53	42	10	0	5	0	2	52000	1640	61	0	0.52	1	19.3337	1	0.866637	2.28333	2	0	0	0	0	0	0	0	FALSE	FALSE	TRUE	FALSE	FALSE	FALSE
73	90	64	26	99	100	96	4	21	39	1	38	64	102	44	58	40	0	0	0	2	83000	1690	68	0	1.11	0	29.0606	1	0.968192	2.81333	3	1	0	0	0	0	0	0	TRUE	FALSE	TRUE	FALSE	FALSE	FALSE
73	102	62	40	100	100	99	1	21	36	2	34	58	78	49	29	10	0	0	0	2	92000	1640	77	0	0.79	0	34.2058	1	0.976515	1.40333	1	1	0	1	0	0	0	0	FALSE	FALSE	TRUE	FALSE	FALSE	FALSE
79	88	73	15	100	100	100	0	14	29	2	27	76	101	59	42	10	0	0	0	2	64000	1580	80	0	0.57	0	25.6369	1	0.948597	1.16667	1	0	0	0	0	0	0	0	FALSE	FALSE	FALSE	FALSE	FALSE	FALSE
67	98	53	45	99	100	92	8	15	29	1	28	78	114	64	50	10	0	0	0	2	76000	1730	30	0	0.56	0	25.3934	1	1.04038	1.36333	1	0	0	0	0	0	0	0	FALSE	FALSE	FALSE	FALSE	FALSE	TRUE
64	88	54	34	99	100	93	7	12	28	4	24	67	83	59	24	191	0	0	0	2	83000	1790	50	1	0.7	0	25.9043	1	1.00479	2.13	1	0	0	0	0	0	0	0	FALSE	FALSE	FALSE	FALSE	FALSE	FALSE
86	97	77	20	99	100	97	3	15	25	1	24	86	91	79	12	10	0	0	0	2	77000	1700	63	0	0.6	0	26.6436	0	0.966081	1.93	3	0	0	0	0	NA	0	0	TRUE	FALSE	FALSE	FALSE	FALSE	FALSE
63	74	59	15	99	100	96	4	17	35	1	34	68	114	55	59	40	0	0	0	2	61000	1630	82	1	1.2	0	22.9591	1	1.11812	5.11333	3	0	0	0	0	0	1	1	TRUE	FALSE	TRUE	FALSE	FALSE	TRUE
72	80	61	19	99	100	99	1	16	32	1	31	74	88	60	28	44	0	0	0	2	73000	1590	63	0	0.45	0	28.8754	1	0.992596	4.2	2	0	0	0	0	0	1	1	FALSE	FALSE	FALSE	FALSE	FALSE	FALSE
58	67	54	13	99	100	99	1	13	34	1	33	65	89	56	33	10	0	0	0	2	75000	1700	65	0	0.71	0	25.9516	0	0.96656	4.91333	2	0	0	0	0	0	1	0	FALSE	FALSE	FALSE	FALSE	FALSE	FALSE
62	73	42	31	97	100	96	4	14	34	1	33	61	71	57	14	10	0	0	0	2	78000	1750	55	0	0.43	0	25.4694	0	0.966941	4.1	1	0	0	0	0	0	0	0	FALSE	FALSE	FALSE	TRUE	FALSE	FALSE
47	74	39	35	99	100	99	1	12	32	1	31	63	76	54	22	10	0	0	0	2	87000	1700	71	0	0.83	0	30.1038	0	0.977984	4.4	2	0	1	0	0	0	0	1	FALSE	FALSE	TRUE	TRUE	FALSE	FALSE
80	111	71	40	99	100	98	2	14	91	1	90	62	89	53	36	50	0	0	0.5	2	96000	1610	74	1	0.73	2	37.0356	1	0.414939	2.04667	2	1	0	0	0	0	1	0	FALSE	FALSE	TRUE	FALSE	FALSE	FALSE
151	180	87	93	99	100	69	31	18	33	11	22	77	103	60	43	20	0	0	0	2	65000	1750	91	0	0.56	0	21.2245	0	0.916504	1.09667	NA	NA	NA	NA	NA	NA	0	0	NA	TRUE	FALSE	FALSE	TRUE	FALSE
66	79	59	20	99	100	99	1	15	44	3	41	60	71	53	18	10	0	0	0	2	60000	1500	53	1	0.5	0	26.6667	1	1.00296	2.60333	2	0	0	0	0	0	1	1	FALSE	FALSE	TRUE	FALSE	FALSE	FALSE
65	77	59	18	99	100	99	1	10	27	3	24	78	91	68	23	10	50	0	0	2	84000	1640	73	0	0.34	3	31.2314	1	0.730277	1.47	NA	NA	NA	NA	NA	NA	0	0	NA	FALSE	FALSE	FALSE	FALSE	FALSE
69	86	63	23	100	100	100	0	14	40	2	38	49	74	45	29	50	0	0	0	2	48000	1600	51	1	0.6	0	18.75	1	0.99099	2.61667	NA	0	0	0	0	NA	1	0	NA	FALSE	TRUE	FALSE	FALSE	FALSE
62	85	56	29	100	100	100	0	12	21	2	19	50	65	45	20	10	0	0	0	2	62000	1720	82	0	0.52	0	20.9573	0	0.945524	2.10333	1	1	1	0	0	0	0	0	FALSE	FALSE	TRUE	FALSE	FALSE	FALSE
72	99	63	36	99	100	81	19	14	26	2	24	66	85	54	31	10	50	0	0.5	2	104000	1900	41	1	0.5	3	28.8089	0	0.547481	2.44667	1	0	0	0	0	0	1	0	FALSE	TRUE	TRUE	FALSE	FALSE	FALSE
58	64	54	10	99	100	93	7	19	26	1	25	78	88	73	15	10	0	0	0	2	72000	1700	50	1	0.7	0	24.9135	1	1.00213	2.28	2	0	0	0	0	1	1	0	FALSE	FALSE	FALSE	FALSE	FALSE	FALSE
57	77	53	24	100	100	100	0	18	28	2	26	75	100	63	37	10	0	0	0	2	90000	1750	54	0	0.56	0	29.3878	0	0.97936	2.08	2	0	0	0	0	0	1	0	FALSE	FALSE	FALSE	FALSE	FALSE	FALSE
68	108	58	50	99	100	99	1	14	31	3	28	77	107	41	66	10	0	0	0	2	85000	1660	54	0	0.55	0	30.8463	1	1.00518	1.91333	2	0	0	0	0	0	0	0	FALSE	FALSE	TRUE	FALSE	FALSE	TRUE
71	81	38	43	100	100	100	0	22	31	1	30	78	88	68	20	20	0	0	0	2	62000	1630	76	0	1.8	0	23.3355	1	0.954453	5.63667	2	0	0	0	0	1	1	1	FALSE	FALSE	FALSE	TRUE	FALSE	FALSE
63	76	58	18	99	100	78	22	14	25	2	23	55	68	42	26	10	0	0	0.5	2	81000	1700	77	1	0.6	2	28.0277	0	0.407075	3.56667	1	1	1	0	0	0	1	0	FALSE	TRUE	TRUE	FALSE	FALSE	FALSE
69	91	63	28	99	100	99	1	14	24	2	22	76	96	63	33	50	0	0	0	2	63000	1650	39	0	0.55	0	23.1405	0	0.974516	2.88667	1	0	0	0	0	0	1	0	FALSE	FALSE	FALSE	FALSE	FALSE	FALSE
80	110	71	39	100	100	100	0	22	33	1	32	66	85	55	30	10	0	0	0	2	69000	1700	41	0	0.4	0	23.8754	1	1.02362	2.61333	2	0	0	0	0	0	1	0	FALSE	FALSE	TRUE	FALSE	FALSE	FALSE
55	63	47	16	99	100	99	1	13	29	2	27	61	71	50	21	10	0	0	0	2	82000	1760	62	1	0.56	0	26.4721	0	1.05782	2.11333	2	0	0	0	0	1	1	1	FALSE	FALSE	TRUE	TRUE	FALSE	FALSE
69	87	62	25	100	100	100	0	12	36	2	34	65	83	52	31	20	0	0	0	2	75000	1780	39	0	0.98	0	23.6713	1	1.02751	4.24667	1	0	0	0	0	1	1	0	FALSE	FALSE	TRUE	FALSE	FALSE	FALSE
73	92	55	37	96	100	74	26	21	43	1	42	68	90	57	33	35	0	0	0	2	79000	1680	73	0	0.65	0	27.9904	0	0.974049	6.71667	2	1	0	0	0	0	0	0	FALSE	TRUE	FALSE	FALSE	FALSE	FALSE
90	94	76	18	98	100	95	5	18	30	1	29	57	69	48	21	30	0	0	0	2	100000	1750	63	0	0.38	0	32.6531	0	0.980386	3.1	3	1	0	0	0	0	1	1	TRUE	FALSE	TRUE	FALSE	FALSE	FALSE
80	110	71	39	100	100	100	0	17	29	2	27	59	86	49	37	13	0	0	0	2	69000	1780	44	0	0.63	0	21.7776	0	1.05684	3.33333	2	0	0	1	1	1	1	1	FALSE	FALSE	TRUE	FALSE	FALSE	FALSE
72	81	52	29	99	100	99	1	19	48	6	42	95	121	76	45	13	0	0	0	2	50000	1590	81	0	0.43	0	19.7777	1	0.939716	1.26333	1	0	0	0	0	NA	1	0	FALSE	FALSE	FALSE	FALSE	FALSE	TRUE
60	66	60	6	98	100	92	8	10	29	2	27	69	84	62	22	7	0	0	0	2	78000	1720	78	1	0.53	0	26.3656	0	1.02448	2.31667	1	1	0	0	0	0	1	0	FALSE	FALSE	FALSE	FALSE	FALSE	FALSE
78	89	75	14	99	100	98	2	20	37	2	35	69	78	53	25	13	0	0	0	2	75000	1750	83	1	0.6	0	24.4898	0	1.00817	2.41667	1	1	1	1	0	0	1	0	FALSE	FALSE	TRUE	FALSE	FALSE	FALSE
73	87	58	29	99	100	89	11	10	25	2	23	83	92	79	13	10	0	0	0	2	63000	1750	55	0	0.36	0	20.5714	0	0.956445	1.74667	1	0	0	0	0	0	1	0	FALSE	TRUE	FALSE	FALSE	FALSE	FALSE
55	65	49	16	99	100	95	5	13	27	2	25	76	86	64	22	50	0	0	0	2	52000	1620	53	1	0.4	0	19.8141	1	0.990158	1.99667	1	0	0	0	0	0	1	0	FALSE	FALSE	FALSE	TRUE	FALSE	FALSE
80	93	73	20	99	100	92	8	17	39	1	38	70	91	57	34	12	0	0	0	2	96000	1600	73	0	0.51	0	37.5	1	0.982433	1.58	1	1	0	0	0	0	0	0	FALSE	FALSE	FALSE	FALSE	FALSE	FALSE
67	87	56	31	99	100	95	5	12	25	2	23	74	90	61	29	39	0	0	0	2	80000	1780	51	0	0.74	0	25.2493	0	0.968013	1.93667	1	0	0	0	0	0	1	0	FALSE	FALSE	FALSE	FALSE	FALSE	FALSE
87	95	59	36	100	100	100	0	16	26	1	25	88	112	77	35	54	30	0	0	2	95000	1700	60	0	0.52	3	32.872	0	0.85534	2.16667	2	0	1	0	0	0	1	0	FALSE	FALSE	FALSE	FALSE	FALSE	TRUE
63	76	52	24	100	100	100	0	15	30	1	29	89	103	68	35	50	0	0	0	2	144000	1750	68	0	0.78	0	47.0204	1	1.003	2.71667	3	0	0	0	0	0	0	0	TRUE	FALSE	FALSE	FALSE	FALSE	FALSE
60	73	53	20	99	100	84	16	18	34	1	33	74	93	55	38	180	0	0	0	2	88000	1670	69	1	1.35	0	31.5537	0	0.977181	4.68667	2	0	0	0	1	1	0	0	FALSE	TRUE	TRUE	FALSE	FALSE	FALSE
59	72	55	17	100	100	100	0	14	20	2	18	54	62	50	12	80	0	0	0	2	103000	1870	41	1	0.5	0	29.4547	0	1.08698	4.32	1	0	0	0	0	0	1	0	FALSE	FALSE	TRUE	FALSE	FALSE	FALSE
73	81	67	14	100	100	100	0	12	28	2	26	71	91	63	28	45	0	0	0	2	64000	1590	63	0	0.55	0	25.3155	0	1.02494	2.19667	4	0	0	0	1	0	1	1	TRUE	FALSE	FALSE	FALSE	FALSE	FALSE
73	82	66	16	100	100	100	0	20	27	16	11	59	67	54	13	30	0	0	0	2	54000	1640	59	0	0.25	0	20.0773	1	0.99172	2.92	1	0	0	0	0	0	1	0	FALSE	FALSE	TRUE	FALSE	FALSE	FALSE
75	80	72	8	100	100	100	0	19	25	2	23	70	75	67	8	30	0	0	0	2	52000	1630	70	0	0.32	0	19.5717	0	0.948486	2.47	1	0	0	0	0	0	1	0	FALSE	FALSE	FALSE	FALSE	FALSE	FALSE
76	88	60	28	100	100	100	0	9	21	5	16	68	89	55	34	35	0	0	0	2	85000	1870	69	0	0.75	0	24.3072	0	0.961799	1.65	2	1	0	0	0	0	1	0	FALSE	FALSE	TRUE	FALSE	FALSE	FALSE
68	84	64	20	100	100	100	0	11	33	2	31	72	98	58	40	40	0	0	0	2	65000	1800	72	1	0.52	0	20.0617	0	1.02007	2.96667	1	1	0	0	0	0	0	0	FALSE	FALSE	FALSE	FALSE	FALSE	FALSE
71	90	65	25	99	100	95	5	17	29	1	28	64	91	46	45	20	0	0	0	2	81000	1730	71	0	0.55	0	27.0641	0	0.970095	2.83333	1	1	1	0	0	0	0	0	FALSE	FALSE	TRUE	FALSE	FALSE	FALSE
97	108	87	21	89	96	84	12	14	58	2	56	63	86	53	33	10	0	0	0	2	61000	1620	74	1	1.02	0	23.2434	1	1.15793	1.77	3	0	0	1	0	0	0	0	TRUE	TRUE	TRUE	FALSE	FALSE	FALSE
71	93	58	35	99	100	98	2	11	40	1	39	56	68	50	18	20	0	0	0	2	60000	1820	46	0	0.96	0	18.1138	0	0.960624	3.16333	1	0	0	1	0	0	0	0	FALSE	FALSE	TRUE	FALSE	FALSE	FALSE
66	98	60	38	99	100	95	5	13	27	2	25	77	91	67	24	60	0	0	0	2	85000	1750	26	1	0.63	0	27.7551	1	1.01797	2.45	2	1	0	0	0	1	0	0	FALSE	FALSE	FALSE	FALSE	FALSE	FALSE
76	87	57	30	97	100	71	29	16	69	1	68	84	94	71	23	60	0	0	0	2	67000	1650	69	1	0.61	0	24.6097	1	0.978436	2.51333	2	1	0	1	0	0	0	0	FALSE	TRUE	FALSE	FALSE	FALSE	FALSE
74	106	67	39	99	100	97	3	12	59	2	57	60	90	44	46	20	0	0	0	2	68000	1720	53	1	0.72	0	22.9854	1	0.993925	2.72	1	0	0	0	0	0	0	0	FALSE	FALSE	TRUE	FALSE	FALSE	FALSE
79	89	61	28	97	99	95	4	14	24	4	20	84	102	72	30	50	0	0	0	2	87000	1850	66	1	0.35	0	25.42	0	1.15218	3.2	3	0	0	0	0	0	1	0	TRUE	FALSE	FALSE	FALSE	FALSE	FALSE
65	86	55	31	99	100	71	29	14	35	1	34	89	112	67	45	50	0	0	0	2	76000	1640	63	1	0.51	0	28.257	1	1.21338	2.84667	3	0	0	0	0	1	1	0	TRUE	TRUE	FALSE	FALSE	FALSE	TRUE
65	97	55	42	99	100	97	3	18	33	2	31	71	84	64	20	40	0	0	0	2	75000	1850	30	0	0.61	0	21.9138	0	0.991613	5.03	2	0	0	1	0	1	1	0	FALSE	FALSE	FALSE	FALSE	FALSE	FALSE
68	78	61	17	99	100	99	1	17	30	2	28	71	90	61	29	30	0	0	0	2	78000	1650	78	0	0.48	0	28.6501	0	0.97216	4.33	1	1	0	1	0	0	0	0	FALSE	FALSE	FALSE	FALSE	FALSE	FALSE
59	87	53	34	99	100	89	11	11	63	2	61	75	104	63	41	40	0	0	0.5	2	72000	1640	54	1	0.52	2	26.7698	1	0.369795	3.68333	1	0	0	0	0	0	0	0	FALSE	TRUE	FALSE	FALSE	FALSE	FALSE
90	107	63	44	98	100	91	9	12	28	2	26	84	101	70	31	50	0	0	0	2	70000	1600	72	1	0.9	0	27.3438	1	0.979937	6.06667	2	0	0	0	0	0	1	1	FALSE	FALSE	FALSE	FALSE	FALSE	FALSE
70	90	55	35	98	100	96	4	17	28	2	26	60	68	55	13	50	0	0	0	2	92000	1850	61	1	0.75	0	26.8809	0	1.05949	3.63	2	0	0	0	0	0	0	0	FALSE	FALSE	TRUE	FALSE	FALSE	FALSE
77	101	62	39	99	100	94	6	25	42	5	37	73	103	61	42	20	0	0	0	2	88000	1780	89	0	1.11	0	27.7743	0	0.921376	2.06333	NA	NA	NA	NA	NA	NA	0	1	NA	FALSE	FALSE	FALSE	FALSE	FALSE
62	108	53	55	99	100	99	1	8	24	2	22	64	98	49	49	40	0	0	0	2	61000	1600	46	1	0.45	0	23.8281	1	1.00436	2.61667	2	0	0	0	0	0	1	0	FALSE	FALSE	TRUE	FALSE	FALSE	FALSE
70	84	68	16	99	100	91	9	13	28	2	26	66	82	56	26	40	0	0	0	2	80000	1680	90	0	0.6	0	28.3447	0	0.96169	2.49667	NA	0	1	0	0	0	0	1	NA	FALSE	FALSE	FALSE	FALSE	FALSE
76	98	64	34	99	100	98	2	15	39	2	37	83	157	58	99	40	0	0	0	2	78000	1820	51	0	0.42	0	23.5479	0	0.96407	1.73333	2	0	0	0	0	0	0	0	FALSE	FALSE	FALSE	FALSE	FALSE	TRUE
79	84	72	12	99	100	99	1	19	27	2	25	63	73	57	16	50	0	0	0	2	61000	1610	55	0	0.6	0	23.533	1	1.00344	1.73333	1	1	0	0	0	0	0	0	FALSE	FALSE	FALSE	FALSE	FALSE	FALSE
58	67	46	21	100	100	100	0	16	25	2	23	67	83	58	25	40	0	0	0	2	53000	1590	67	0	1.19	0	20.9644	1	0.973476	4.97	1	0	0	0	0	1	0	0	FALSE	FALSE	FALSE	TRUE	FALSE	FALSE
49	63	46	17	99	100	96	4	13	41	2	39	55	59	49	10	40	0	0	0	2	82000	1630	62	0	0.5	0	30.863	1	0.99256	3.58333	2	0	0	0	0	1	0	0	FALSE	FALSE	TRUE	TRUE	FALSE	FALSE
91	122	78	44	99	100	98	2	15	26	2	24	84	106	69	37	90	0	0	0	2	85000	1750	56	0	0.73	0	27.7551	0	0.973444	3.86333	1	0	0	0	0	0	0	0	FALSE	FALSE	FALSE	FALSE	TRUE	TRUE
72	90	60	30	100	100	100	0	10	32	2	30	70	109	53	56	50	0	0	0	2	53000	1620	52	0	1.11	0	20.1951	1	1.00205	2.38	NA	0	0	0	0	0	0	0	NA	FALSE	TRUE	FALSE	FALSE	TRUE
83	105	71	34	99	100	91	9	16	38	2	36	81	143	55	88	100	0	0	0.5	2	108000	1830	53	0	0.68	2	32.2494	0	1.79743	1.9	2	1	0	0	0	0	1	0	FALSE	FALSE	TRUE	FALSE	FALSE	TRUE
66	90	33	57	99	100	96	4	14	38	2	36	71	83	65	18	50	0	0	0	2	85000	1750	88	0	0.5	0	27.7551	0	0.962457	1.26667	1	1	0	1	0	0	0	0	FALSE	FALSE	FALSE	TRUE	FALSE	FALSE
67	83	32	51	99	100	97	3	20	48	2	46	71	129	56	73	40	0	0	0	2	66000	1700	54	0	0.63	0	22.8374	1	1.0031	3.16333	1	0	0	0	0	0	1	0	FALSE	FALSE	FALSE	TRUE	FALSE	TRUE
75	116	59	57	99	100	81	19	22	57	2	55	78	122	56	66	20	0	0	0	2	60000	1560	83	0	0.58	0	24.6548	0	0.958693	1.18333	NA	0	0	0	0	0	0	0	NA	TRUE	FALSE	FALSE	FALSE	TRUE
67	75	46	29	99	100	99	1	15	20	2	18	70	81	57	24	70	0	0	0	2	74000	1830	43	0	0.6	0	22.0968	0	0.967584	1.49667	1	0	0	0	0	1	0	0	FALSE	FALSE	FALSE	TRUE	FALSE	FALSE
55	71	50	21	99	100	96	4	23	36	3	33	86	106	77	29	70	0	0	0	2	97000	1740	63	1	0.6	0	32.0386	1	1.15581	1.21333	NA	NA	NA	NA	NA	NA	0	0	NA	FALSE	FALSE	TRUE	FALSE	TRUE
68	89	61	28	99	100	76	24	23	38	2	36	57	72	49	23	40	0	0	0	2	107000	1840	79	1	0.55	0	31.6044	0	1.03285	3.23667	2	1	0	0	0	0	1	1	FALSE	TRUE	TRUE	FALSE	FALSE	FALSE
97	125	84	41	99	100	96	4	20	33	1	32	79	95	54	41	50	0	0	0	2	86000	1580	28	0	0.43	0	34.4496	1	1.03476	2.36667	2	0	0	1	0	0	1	0	FALSE	FALSE	TRUE	FALSE	TRUE	FALSE
82	98	58	40	99	100	99	1	17	29	1	28	110	140	90	50	50	0	0	0	2	62000	1530	56	0	0.42	0	26.4855	1	1.00444	3.43333	1	1	0	0	0	0	0	0	FALSE	FALSE	FALSE	FALSE	FALSE	TRUE
71	79	66	13	99	100	97	3	15	26	1	25	83	95	73	22	50	0	0	0	2	83000	1760	53	0	0.26	0	26.7949	0	0.971227	1.81333	2	0	0	0	0	1	0	0	FALSE	FALSE	FALSE	FALSE	FALSE	FALSE
63	77	55	22	100	100	100	0	17	37	1	36	62	84	51	33	60	0	0	0	2	58000	1700	77	1	1.48	0	20.0692	0	1.08913	2.36333	3	0	0	0	0	0	1	1	TRUE	FALSE	TRUE	FALSE	FALSE	FALSE
69	99	61	38	99	100	96	4	14	29	2	27	51	75	30	45	30	0	0	0	2	71000	1620	43	1	0.36	0	27.0538	1	1.00449	4.18	1	0	0	0	0	0	0	0	FALSE	FALSE	TRUE	FALSE	FALSE	FALSE
126	133	124	9	99	100	98	2	19	58	1	57	77	106	62	44	20	0	0	0	2	65000	1600	74	0	0.33	0	25.3906	0	0.963924	1	2	1	0	0	0	0	1	1	FALSE	FALSE	FALSE	FALSE	TRUE	TRUE
104	144	93	51	100	100	100	0	20	32	1	31	73	97	62	35	10	0	0	0	2	60000	1570	27	0	0.73	0	24.3418	1	1.04695	2.95	2	0	0	0	0	0	0	0	FALSE	FALSE	FALSE	FALSE	TRUE	FALSE
86	96	75	21	99	100	98	2	16	32	2	30	87	115	61	54	100	0	0	0	2	56000	1610	72	1	0.73	0	21.6041	1	0.969203	2.78	2	1	0	1	0	0	0	0	FALSE	FALSE	FALSE	FALSE	FALSE	TRUE
82	113	59	54	99	100	99	1	19	26	2	24	83	97	69	28	50	0	0	0	2	69000	1750	61	0	0.48	0	22.5306	0	0.958878	4.41667	1	0	0	0	0	0	0	0	FALSE	FALSE	FALSE	FALSE	FALSE	FALSE
68	90	56	34	99	100	97	3	16	34	2	32	73	86	61	25	100	0	0	0	2	68000	1720	51	1	0.98	0	22.9854	0	1.07633	3.84667	NA	0	0	0	0	0	0	0	NA	FALSE	FALSE	FALSE	FALSE	FALSE
66	90	51	39	100	100	100	0	14	31	2	29	77	122	61	61	50	0	0	0	2	72000	1700	59	0	0.51	0	24.9135	1	0.998539	2.01333	2	1	0	0	0	0	0	0	FALSE	FALSE	FALSE	FALSE	FALSE	TRUE
72	79	62	17	99	100	97	3	15	32	2	30	91	121	69	52	50	0	0	0	2	79000	1580	59	0	0.45	0	31.6456	1	0.997633	1.98	2	0	0	0	0	0	0	0	FALSE	FALSE	FALSE	FALSE	FALSE	TRUE
66	81	57	24	100	100	100	0	8	19	1	18	80	91	74	17	50	0	0	0	2	78000	1780	64	0	0.25	0	24.6181	0	0.963253	2.24667	2	0	0	0	0	0	1	0	FALSE	FALSE	FALSE	FALSE	FALSE	FALSE
75	95	67	28	100	100	100	0	16	45	2	43	86	108	71	37	50	0	0	0	2	56000	1670	60	0	0.35	0	20.0796	1	0.989628	1.89667	1	1	0	0	0	0	1	0	FALSE	FALSE	FALSE	FALSE	FALSE	TRUE
70	84	59	25	99	100	96	4	10	35	2	33	83	90	77	13	50	0	0	0	2	82000	1780	63	1	0.56	0	25.8806	0	0.969889	1.89667	1	0	0	0	1	0	1	0	FALSE	FALSE	FALSE	FALSE	FALSE	FALSE
76	98	52	46	99	100	95	5	17	34	2	32	69	83	49	34	50	0	0	0	2	71000	1750	50	0	0.38	0	23.1837	0	0.963645	1.69667	2	0	0	0	0	0	1	0	FALSE	FALSE	TRUE	FALSE	FALSE	FALSE
87	109	67	42	99	100	98	2	12	23	2	21	94	103	81	22	100	0	0	0	2	80000	1780	45	0	0.37	0	25.2493	0	0.971862	1.78667	2	0	0	0	0	0	1	0	FALSE	FALSE	FALSE	FALSE	FALSE	FALSE
103	121	70	51	100	100	100	0	18	26	1	25	76	82	71	11	20	0	0	0	2	90000	1800	59	0	0.78	0	27.7778	0	0.972859	2.38333	2	0	0	0	0	0	1	0	FALSE	FALSE	FALSE	FALSE	TRUE	FALSE
88	99	76	23	99	100	96	4	15	41	2	39	64	84	53	31	20	0	0	0	2	84000	1760	39	0	0.71	0	27.1178	0	0.984012	3.48	1	0	0	0	0	0	1	0	FALSE	FALSE	TRUE	FALSE	FALSE	FALSE
62	76	50	26	100	100	100	0	16	27	2	25	58	82	46	36	20	0	0	0	2	75000	1820	21	0	0.67	0	22.6422	0	0.944698	2.62	3	0	0	0	0	0	1	0	TRUE	FALSE	TRUE	TRUE	FALSE	FALSE
71	93	59	34	100	100	100	0	20	49	1	48	56	71	49	22	10	0	0	0	2	54000	1580	30	0	0.55	0	21.6311	1	1.04624	2.11333	1	0	0	0	0	1	1	0	FALSE	FALSE	TRUE	FALSE	FALSE	FALSE
85	102	76	26	99	100	94	6	13	37	2	35	82	104	68	36	150	0	0	0.5	2	95000	1670	58	0	0.81	2	34.0636	0	1.83456	2.48	2	0	0	0	0	0	0	0	FALSE	FALSE	FALSE	FALSE	FALSE	FALSE
83	93	65	28	97	100	87	13	12	27	2	25	79	95	50	45	100	0	0	0.5	2	98000	1630	44	0	0.85	2	36.8851	1	1.63247	3.15	1	0	0	0	0	0	1	0	FALSE	TRUE	TRUE	FALSE	FALSE	FALSE
76	98	54	44	99	100	99	1	15	50	6	44	65	81	59	22	100	0	0	0	2	90000	1830	54	1	0.78	0	26.8745	0	1.06975	3.61667	1	0	0	0	0	0	0	1	FALSE	FALSE	FALSE	FALSE	FALSE	FALSE
97	123	78	45	100	100	100	0	18	39	2	37	109	151	93	58	100	0	0	0	2	75000	1680	49	1	0.52	0	26.5731	1	1.00404	3.23667	2	0	0	0	0	0	0	0	FALSE	FALSE	FALSE	FALSE	TRUE	TRUE
73	83	52	31	99	100	95	5	15	36	1	35	92	124	77	47	100	0	0	0	2	75000	1660	70	1	0.73	0	27.2173	0	0.999964	4.01333	3	1	0	0	1	0	1	0	TRUE	FALSE	FALSE	FALSE	FALSE	TRUE
69	90	58	32	98	100	94	6	17	42	1	41	60	73	46	27	50	0	0	0	2	52000	1550	78	1	0.67	0	21.6441	1	0.959904	2.51667	2	0	0	0	0	0	1	0	FALSE	FALSE	TRUE	FALSE	FALSE	FALSE
65	78	52	26	99	100	97	3	11	20	2	18	74	78	70	8	50	0	0	0	2	75000	1670	62	0	0.29	0	26.8923	0	1.01585	3.40333	2	0	0	1	1	0	0	0	FALSE	FALSE	FALSE	FALSE	FALSE	FALSE
77	100	69	31	99	100	98	2	14	35	7	28	73	94	58	36	50	0	0	0	2	87000	1700	77	0	0.73	0	30.1038	0	0.975099	1.21333	2	1	0	1	0	0	0	0	FALSE	FALSE	FALSE	FALSE	FALSE	FALSE
83	95	70	25	99	100	88	12	13	26	1	25	87	119	69	50	100	0	5	0	2	79000	1640	62	1	0.61	1	29.3724	0	1.0911	3.51333	2	1	0	0	1	NA	1	0	FALSE	TRUE	FALSE	FALSE	FALSE	TRUE
58	75	40	35	100	100	100	0	9	20	1	19	66	77	59	18	50	0	0	0	2	61000	1680	59	0	0.88	0	21.6128	1	0.96536	2.53	4	0	0	0	0	1	1	0	TRUE	FALSE	FALSE	TRUE	FALSE	FALSE
72	93	66	27	99	100	98	2	13	25	1	24	67	84	57	27	50	0	5	0	2	67000	1580	37	1	0.39	1	26.8386	1	0.39834	1.50333	3	0	0	0	0	0	1	0	TRUE	FALSE	FALSE	FALSE	FALSE	FALSE
87	97	69	28	99	100	92	8	11	37	2	35	106	159	86	73	90	0	0	0	2	72000	1700	61	0	0.57	0	24.9135	0	1.0171	1.83667	1	1	0	1	1	0	1	0	FALSE	FALSE	FALSE	FALSE	FALSE	TRUE
68	89	60	29	100	100	100	0	11	25	2	23	59	94	49	45	100	0	0	0	2	84000	1760	24	1	0.9	0	27.1178	1	1.02216	1.91333	1	0	0	0	0	0	1	0	FALSE	FALSE	TRUE	FALSE	FALSE	FALSE
94	105	74	31	97	100	93	7	20	44	2	42	89	102	80	22	50	0	5	0	2	64000	1550	66	1	0.48	1	26.6389	1	1.53278	1.41333	1	0	0	0	0	NA	1	0	FALSE	FALSE	FALSE	FALSE	FALSE	FALSE
83	105	60	45	98	100	97	3	19	35	1	34	67	83	53	30	10	0	0	0	2	40000	1550	65	0	0.31	0	16.6493	1	0.975524	2.21333	2	0	0	0	0	0	1	0	FALSE	FALSE	TRUE	FALSE	FALSE	FALSE
84	112	63	49	97	100	88	12	11	42	1	41	78	93	54	39	70	0	0	0	2	79000	1600	57	1	0.52	0	30.8594	1	1.0007	2.15	2	0	0	1	0	1	1	0	FALSE	TRUE	TRUE	FALSE	FALSE	FALSE
79	95	57	38	97	100	90	10	10	32	2	30	76	84	70	14	50	0	0	0	2	98000	1770	70	1	0.38	0	31.2809	0	1.05544	1.48	2	0	0	0	0	1	1	0	FALSE	TRUE	FALSE	FALSE	FALSE	FALSE
97	115	62	53	100	100	100	0	18	32	1	31	67	75	62	13	70	0	0	0	2	48000	1720	15	1	0.51	0	16.225	0	1.05817	2.41333	NA	NA	NA	NA	NA	NA	1	0	NA	FALSE	FALSE	FALSE	FALSE	FALSE
83	105	69	36	100	100	100	0	17	28	2	26	63	73	56	17	50	0	0	0	2	79000	1600	48	0	0.35	0	30.8594	1	1.00682	1.73333	2	1	0	0	0	0	1	0	FALSE	FALSE	FALSE	FALSE	FALSE	FALSE
93	101	87	14	99	100	96	4	11	25	2	23	89	94	87	7	50	0	0	0	2	94000	1720	59	0	0.32	0	31.7739	0	0.987415	1.23333	2	1	0	0	0	0	1	0	FALSE	FALSE	FALSE	FALSE	FALSE	FALSE
76	92	68	24	99	100	97	3	12	24	2	22	84	97	71	26	50	0	0	0	2	57000	1630	76	1	0.41	0	21.4536	1	0.963299	0.98	2	1	0	0	0	0	1	0	FALSE	FALSE	FALSE	FALSE	FALSE	FALSE
67	92	49	43	99	100	99	1	13	92	1	91	71	105	54	51	150	0	0	0.5	2	93000	1840	82	1	1.9	2	27.4693	0	0.293519	2.98667	NA	NA	NA	NA	NA	NA	0	0	NA	FALSE	TRUE	TRUE	FALSE	TRUE
86	115	75	40	99	100	97	3	14	26	1	25	68	79	57	22	30	0	0	0	2	85000	1740	30	0	0.26	0	28.075	0	0.997671	1.91333	1	0	0	0	0	0	0	0	FALSE	FALSE	FALSE	FALSE	FALSE	FALSE
74	85	66	19	100	100	100	0	11	19	2	17	56	68	52	16	40	0	0	0	2	74000	1660	71	0	0.65	0	26.8544	0	0.969311	4.01667	1	1	0	1	0	0	0	0	FALSE	FALSE	TRUE	FALSE	FALSE	FALSE
96	129	75	54	100	100	100	0	17	29	2	27	70	80	60	20	30	0	0	0	2	64000	1720	19	1	0.75	0	21.6333	1	1.04367	3.33667	1	0	0	0	0	0	0	0	FALSE	FALSE	FALSE	FALSE	TRUE	FALSE
80	98	61	37	98	100	97	3	23	32	2	30	66	70	61	9	40	0	0	0	2	80000	1560	48	0	0.5	0	32.8731	1	1.00304	2.3	2	0	0	0	0	0	0	0	FALSE	FALSE	FALSE	FALSE	FALSE	FALSE
84	100	74	26	99	100	98	2	16	29	1	28	63	70	55	15	50	0	0	0	2	49000	1680	40	0	0.55	0	17.3611	1	0.974735	2.34667	3	0	0	0	0	0	0	0	TRUE	FALSE	TRUE	FALSE	FALSE	FALSE
68	74	60	14	99	100	95	5	15	23	1	22	76	86	66	20	45	0	0	0	2	84000	1650	60	0	0.55	0	30.854	1	0.9963	1.65333	2	1	0	1	0	0	1	0	FALSE	FALSE	FALSE	FALSE	FALSE	FALSE
63	81	46	35	99	100	99	1	16	30	1	29	81	93	72	21	40	0	0	0	2	66000	1680	59	0	0.33	0	23.3844	1	0.996175	2.28333	2	0	0	0	0	0	1	0	FALSE	FALSE	FALSE	TRUE	FALSE	FALSE
73	88	58	30	100	100	100	0	17	33	2	31	90	110	77	33	20	0	0	0	2	61000	1640	58	0	0.38	0	22.68	1	0.997361	1.48333	1	0	0	0	0	0	1	0	FALSE	FALSE	FALSE	FALSE	FALSE	TRUE
60	77	53	24	98	100	91	9	11	23	1	22	64	68	62	6	50	0	0	0	2	41000	1540	46	1	0.53	0	17.2879	0	1.07798	2.21333	1	1	0	0	0	1	1	0	FALSE	FALSE	FALSE	FALSE	FALSE	FALSE
68	76	58	18	99	100	99	1	11	23	1	22	73	87	62	25	20	22	0	0	2	87000	1740	66	0	0.63	3	28.7356	0	0.983442	1.7	2	1	0	0	0	0	1	0	FALSE	FALSE	FALSE	FALSE	FALSE	FALSE
103	119	85	34	98	100	96	4	13	24	1	23	96	121	80	41	65	10	0	0	2	86000	1730	56	0	0.62	3	28.7347	0	0.906818	5.46667	1	0	0	0	0	0	0	0	FALSE	FALSE	FALSE	FALSE	FALSE	TRUE
64	74	60	14	100	100	100	0	17	36	1	35	73	86	60	26	30	0	0	0	2	67000	1700	71	0	0.33	0	23.1834	1	0.965995	2.61667	2	0	1	0	0	0	0	0	FALSE	FALSE	FALSE	FALSE	FALSE	FALSE
67	79	61	18	99	100	98	2	11	37	1	36	68	84	60	24	30	0	0	0	2	65000	1670	64	1	0.35	0	23.3067	0	1.04375	1.71667	1	0	0	0	0	1	0	0	FALSE	FALSE	FALSE	FALSE	FALSE	FALSE
60	74	31	43	98	100	93	7	17	49	1	48	75	93	49	44	30	0	0	0	2	84000	1710	76	0	0.41	0	28.7268	0	0.986221	1.41333	3	0	1	1	0	0	0	0	TRUE	FALSE	TRUE	TRUE	FALSE	FALSE
72	101	63	38	100	100	99	1	14	54	1	53	70	91	55	36	40	0	0	0	2	52000	1720	47	1	0.67	0	17.5771	1	0.996175	3.25	2	0	0	0	0	1	0	0	FALSE	FALSE	TRUE	FALSE	FALSE	FALSE
60	77	55	22	100	100	100	0	15	21	1	20	65	75	59	16	45	0	0	0	2	53000	1500	66	0	0.33	0	23.5556	0	0.96033	2.93	1	1	0	0	0	0	1	0	FALSE	FALSE	FALSE	FALSE	FALSE	FALSE
63	92	44	48	97	100	93	7	15	32	1	31	69	79	49	30	100	0	0	0	2	80000	1780	62	1	1	0	25.2493	0	1.05446	3.66667	1	1	0	0	0	1	1	1	FALSE	FALSE	TRUE	TRUE	FALSE	FALSE
71	85	65	20	99	100	97	3	12	23	7	16	69	86	58	28	50	0	0	0	2	96000	1700	55	1	0.45	0	33.218	1	0.997493	2.16333	2	0	0	1	0	0	1	0	FALSE	FALSE	FALSE	FALSE	FALSE	FALSE
80	99	65	34	100	100	100	0	14	27	1	26	83	100	68	32	30	0	0	0	2	82000	1640	57	0	0.33	0	30.4878	0	0.982376	3.21333	2	1	0	0	0	0	0	0	FALSE	FALSE	FALSE	FALSE	FALSE	FALSE
64	86	58	28	100	100	100	0	12	24	1	23	56	97	45	52	40	0	0	0	2	58000	1640	62	0	0.48	0	21.5645	0	0.956668	4.46333	2	0	0	0	0	0	0	0	FALSE	FALSE	TRUE	FALSE	FALSE	FALSE
78	100	68	32	99	100	95	5	16	35	1	34	78	92	61	31	50	0	0	0	2	97000	1900	30	1	0.43	0	26.8698	0	1.10225	2.44667	1	0	0	0	0	NA	1	1	FALSE	FALSE	FALSE	FALSE	FALSE	FALSE
76	82	74	8	99	100	96	4	12	34	1	33	79	83	76	7	50	0	0	0	2	49500	1630	66	0	0.3	0	18.6307	0	1.0235	1.14667	1	0	0	0	1	0	1	1	FALSE	FALSE	FALSE	FALSE	FALSE	FALSE
86	94	61	33	100	100	100	0	15	35	2	33	105	144	80	64	50	0	0	0	2	51000	1500	77	1	0.42	0	22.6667	1	0.964926	1.28333	1	0	0	0	0	0	0	0	FALSE	FALSE	FALSE	FALSE	FALSE	TRUE
79	91	69	22	99	100	93	7	11	29	2	27	63	90	49	41	50	0	0	0	2	133000	1800	61	0	0.38	0	41.0494	0	0.996726	1.13	3	1	0	0	0	0	0	0	TRUE	FALSE	TRUE	FALSE	FALSE	FALSE
77	86	62	24	99	100	99	1	29	53	1	52	50	56	47	9	50	0	0	0	2	64000	1690	29	0	0.45	0	22.4082	0	0.993579	1.68667	2	0	0	0	0	0	1	0	FALSE	FALSE	TRUE	FALSE	FALSE	FALSE
69	84	64	20	99	100	99	1	21	36	2	34	77	98	70	28	50	0	0	0	2	76000	1650	38	0	0.38	0	27.9155	1	1.02459	2.83	1	0	0	0	0	0	1	0	FALSE	FALSE	FALSE	FALSE	FALSE	FALSE
65	90	53	37	100	100	100	0	14	24	1	23	62	73	57	16	50	0	0	0	2	62000	1730	24	0	0.54	0	20.7157	0	0.995927	2.37	1	0	0	0	0	0	1	0	FALSE	FALSE	FALSE	FALSE	FALSE	FALSE
70	76	63	13	98	100	93	7	16	42	2	40	72	123	49	74	50	0	0	0	2	64000	1680	77	1	0.75	0	22.6757	1	0.946091	2.68	3	0	0	0	1	0	0	0	TRUE	FALSE	TRUE	FALSE	FALSE	TRUE
79	105	63	42	100	100	100	0	15	20	1	19	57	95	37	58	70	0	0	0	2	80000	1700	63	0	0.53	0	27.6817	0	0.971677	5.73333	1	0	0	0	0	1	0	0	FALSE	FALSE	TRUE	FALSE	FALSE	FALSE
66	96	56	40	99	100	84	16	20	44	4	40	53	69	41	28	50	0	0	0	2	49000	1630	20	0	0.5	0	18.4425	1	1.06804	5.05333	NA	0	0	0	0	0	0	0	NA	TRUE	TRUE	FALSE	FALSE	FALSE
70	100	57	43	96	100	87	13	11	41	2	39	76	111	61	50	100	0	0	0	2	76000	1650	63	1	0.95	0	27.9155	1	1.1233	3.30333	NA	NA	NA	NA	NA	NA	0	0	NA	TRUE	FALSE	FALSE	FALSE	TRUE
64	79	58	21	99	100	99	1	11	54	2	52	69	98	59	39	40	0	0	0	2	60000	1650	63	1	0.7	0	22.0386	0	1.0417	1.38667	2	0	0	0	0	NA	0	0	FALSE	FALSE	FALSE	FALSE	FALSE	FALSE
60	69	52	17	99	100	96	4	12	18	2	16	61	86	43	43	50	0	5	0	2	85000	1640	68	1	0.41	1	31.6032	1	0.549495	3.53	3	1	0	0	0	0	1	1	TRUE	FALSE	TRUE	FALSE	FALSE	FALSE
90	100	76	24	100	100	100	0	32	48	1	47	71	85	37	48	50	0	0	0	2	52000	1600	69	0	0.24	0	20.3125	1	0.968291	2.52	2	1	0	1	0	1	0	0	FALSE	FALSE	TRUE	FALSE	FALSE	FALSE
68	107	53	54	99	100	98	2	11	36	1	35	63	96	49	47	100	0	5	0	2	57000	1650	69	0	1.78	1	20.9366	0	1.12973	3.66333	3	0	0	0	0	NA	1	1	TRUE	FALSE	TRUE	FALSE	FALSE	FALSE
94	128	82	46	100	100	100	0	18	32	6	26	69	89	57	32	70	0	0	0	2	63000	1630	23	0	0.6	0	23.7118	1	1.05444	2.18	1	0	0	1	0	0	0	0	FALSE	FALSE	FALSE	FALSE	TRUE	FALSE
66	83	59	24	100	100	100	0	19	26	2	24	89	103	82	21	40	0	0	0	2	71000	1720	66	0	0.54	0	23.9995	0	0.960755	3.88667	3	1	0	0	0	0	0	0	TRUE	FALSE	FALSE	FALSE	FALSE	FALSE
94	113	72	41	99	100	99	1	19	25	2	23	76	92	66	26	40	0	0	0	2	50000	1610	25	0	0.45	0	19.2894	1	1.05783	3.22	1	0	0	0	0	0	0	0	FALSE	FALSE	FALSE	FALSE	FALSE	FALSE
98	128	32	96	99	100	98	2	19	34	2	32	75	91	52	39	40	0	0	0	2	85000	1690	59	0	0.69	0	29.7609	1	0.999135	1.43667	2	1	0	0	0	0	0	0	FALSE	FALSE	TRUE	TRUE	TRUE	FALSE
75	87	67	20	100	100	100	0	13	22	1	21	83	92	74	18	100	0	0	0	2	70000	1730	38	0	0.42	0	23.3887	1	1.02952	1.78667	2	0	0	0	0	1	1	0	FALSE	FALSE	FALSE	FALSE	FALSE	FALSE
76	85	68	17	99	100	92	8	8	22	1	21	72	87	55	32	50	0	0	0	2	98000	1620	67	1	0.5	0	37.3419	1	0.989422	2.03333	2	1	0	0	0	0	1	0	FALSE	FALSE	TRUE	FALSE	FALSE	FALSE
71	77	65	12	99	100	98	2	16	30	1	29	75	99	61	38	50	0	0	0	2	74000	1630	74	0	0.37	0	27.852	1	0.963385	3.15333	2	0	0	0	0	0	1	0	FALSE	FALSE	FALSE	FALSE	FALSE	FALSE
70	71	70	1	99	100	97	3	16	39	1	38	64	73	54	19	50	0	0	0	2	70000	1500	75	0	0.45	0	31.1111	1	0.970001	1.22	2	0	0	0	0	NA	1	0	FALSE	FALSE	TRUE	FALSE	FALSE	FALSE
80	90	70	20	98	100	88	12	21	45	2	43	81	93	75	18	70	0	0	0	2	101000	1800	62	1	0.75	0	31.1728	0	1.06607	1.50333	2	0	0	1	0	0	1	0	FALSE	TRUE	FALSE	FALSE	FALSE	FALSE
87	91	72	19	99	100	97	3	19	30	1	29	88	109	78	31	40	0	0	0	2	107000	1680	64	0	0.5	0	37.911	0	1.00036	2.85	NA	1	0	0	0	0	1	0	NA	FALSE	FALSE	FALSE	FALSE	TRUE
77	92	64	28	100	100	100	0	12	31	1	30	80	97	62	35	45	0	0	0	2	65000	1620	69	1	0.48	0	24.7676	1	0.978743	1.63333	2	1	0	0	0	0	1	0	FALSE	FALSE	FALSE	FALSE	FALSE	FALSE
84	108	73	35	96	100	95	5	17	39	1	38	60	87	49	38	40	0	0	0	2	83000	1550	67	1	0.65	0	34.5473	1	0.990005	2.11333	2	0	0	0	0	1	1	0	FALSE	FALSE	TRUE	FALSE	FALSE	FALSE
64	78	59	19	99	100	92	8	13	29	1	28	59	64	55	9	30	0	0	0	2	65000	1630	62	0	0.3	0	24.4646	1	0.989834	1.36667	1	0	0	0	0	0	1	0	FALSE	FALSE	TRUE	FALSE	FALSE	FALSE
80	98	63	35	100	100	100	0	14	26	2	24	101	124	81	43	30	0	0	0	2	64000	1670	69	0	0.55	0	22.9481	1	0.970402	1.85	2	1	0	0	0	0	0	0	FALSE	FALSE	FALSE	FALSE	FALSE	TRUE
63	72	57	15	99	100	98	2	7	21	2	19	74	82	66	16	40	0	5	0	2	82000	1720	63	1	0.68	1	27.7177	0	1.39854	3.13	2	0	0	1	0	1	0	0	FALSE	FALSE	FALSE	FALSE	FALSE	FALSE
86	95	76	19	99	100	96	4	8	21	2	19	63	71	56	15	100	0	0	0	2	70000	1720	64	1	0.7	0	23.6614	0	0.9669	2.33	1	0	0	0	1	0	1	0	FALSE	FALSE	FALSE	FALSE	FALSE	FALSE
78	93	68	25	100	100	100	0	18	31	1	30	89	110	75	35	50	0	0	0	2	74000	1580	58	0	0.37	0	29.6427	1	0.990447	2.25	3	0	0	1	0	0	1	0	TRUE	FALSE	FALSE	FALSE	FALSE	TRUE
92	117	85	32	100	100	100	0	16	92	8	84	72	89	58	31	50	0	0	0	2	75000	1650	32	1	0.68	0	27.5482	1	1.01453	2.63333	2	0	0	0	0	0	0	0	FALSE	FALSE	FALSE	FALSE	FALSE	FALSE
91	103	81	22	99	100	99	1	17	25	1	24	68	86	60	26	30	0	0	0	2	75000	1700	84	0	0.59	0	25.9516	1	0.944643	1.92	2	0	0	0	0	0	1	0	FALSE	FALSE	FALSE	FALSE	FALSE	FALSE
86	96	77	19	99	100	89	11	8	33	1	32	86	91	79	12	40	0	0	0	2	78000	1700	73	0	0.3	0	26.9896	0	0.97791	1.43667	3	1	0	0	0	0	1	0	TRUE	TRUE	FALSE	FALSE	FALSE	FALSE
66	86	57	29	98	100	95	5	11	41	1	40	73	76	70	6	30	0	0	0	2	80000	1820	48	0	0.4	0	24.1517	0	0.96696	2.18	1	0	0	0	0	0	1	0	FALSE	FALSE	FALSE	FALSE	FALSE	FALSE
58	67	53	14	99	100	97	3	9	22	1	21	67	80	56	24	30	0	0	0	2	60000	1600	74	1	0.45	0	23.4375	1	0.970053	1.8	2	0	0	0	0	0	1	0	FALSE	FALSE	FALSE	FALSE	FALSE	FALSE
82	97	63	34	99	100	98	2	13	26	1	25	69	81	62	19	30	0	0	0	2	126000	1850	72	0	0.52	0	36.8152	1	0.981854	1.16667	2	1	0	1	0	1	1	0	FALSE	FALSE	FALSE	FALSE	FALSE	FALSE
94	104	82	22	99	100	99	1	13	29	2	27	86	116	60	56	50	0	0	0	2	83000	1810	54	0	0.46	0	25.335	0	0.966994	2.91333	1	0	0	1	0	1	0	0	FALSE	FALSE	FALSE	FALSE	FALSE	TRUE
66	75	56	19	99	100	99	1	20	58	2	56	76	93	66	27	50	0	0	0	2	66000	1690	50	0	0.42	0	23.1084	0	0.963478	2.45	1	0	0	0	0	0	0	0	FALSE	FALSE	FALSE	FALSE	FALSE	FALSE
75	107	63	44	100	100	100	0	13	43	2	41	67	96	50	46	60	0	0	0	2	63000	1800	23	1	0.6	0	19.4444	0	1.10171	1.95333	1	0	0	0	0	1	0	0	FALSE	FALSE	TRUE	FALSE	FALSE	FALSE
70	80	64	16	99	100	91	9	12	42	1	41	80	89	75	14	50	0	0	0	2	80000	1780	58	0	0.69	0	25.2493	0	0.965752	2.35333	2	1	0	0	0	0	1	0	FALSE	FALSE	FALSE	FALSE	FALSE	FALSE
56	71	49	22	99	100	97	3	14	21	2	19	73	91	66	25	10	0	0	0	2	95000	1770	49	0	0.35	0	30.3233	0	0.984803	1.58667	1	0	0	0	0	0	1	0	FALSE	FALSE	FALSE	TRUE	FALSE	FALSE
88	98	74	24	99	100	96	4	13	24	1	23	73	78	69	9	10	0	0	0	2	84000	1760	72	0	0.28	0	27.1178	0	0.977059	1.16333	3	1	0	0	0	0	1	0	TRUE	FALSE	FALSE	FALSE	FALSE	FALSE
67	73	60	13	100	100	100	0	14	21	3	18	76	84	70	14	10	0	0	0	2	71000	1820	56	0	0.32	0	21.4346	0	0.957849	2.25333	1	1	0	0	0	0	1	0	FALSE	FALSE	FALSE	FALSE	FALSE	FALSE
78	83	72	11	98	100	95	5	14	21	2	19	76	103	63	40	10	0	0	0	2	95000	1800	69	0	0.3	0	29.321	0	0.97815	1.81333	2	1	0	0	0	0	1	0	FALSE	FALSE	FALSE	FALSE	FALSE	FALSE
62	69	58	11	99	100	99	1	15	20	2	18	71	91	61	30	30	0	0	0	2	108000	1780	50	0	0.47	0	34.0866	0	0.999401	2.71667	1	0	0	0	0	0	1	1	FALSE	FALSE	FALSE	FALSE	FALSE	FALSE
75	82	70	12	99	100	98	2	9	22	1	21	72	89	61	28	50	0	0	0	2	88000	1700	71	0	0.3	0	30.4498	1	0.973209	1.11333	2	1	0	0	0	1	0	0	FALSE	FALSE	FALSE	FALSE	FALSE	FALSE
76	98	70	28	95	100	73	27	10	23	2	21	67	127	51	76	100	0	0	0	2	64000	1700	89	0	1.42	0	22.1453	0	0.948703	2	1	1	1	1	0	0	0	1	FALSE	TRUE	TRUE	FALSE	FALSE	TRUE
81	110	70	40	100	100	100	0	16	28	1	27	57	92	47	45	72	0	0	0	2	85000	1900	32	0	0.69	0	23.5457	0	0.990058	4.65333	1	0	0	1	0	0	0	0	FALSE	FALSE	TRUE	FALSE	FALSE	FALSE
71	97	65	32	100	100	100	0	18	23	1	22	86	110	74	36	35	0	0	0	2	61000	1700	55	0	0.28	0	21.1073	0	0.957506	3.81333	2	1	0	0	0	0	0	0	FALSE	FALSE	FALSE	FALSE	FALSE	TRUE
91	128	81	47	99	100	98	2	16	32	1	31	62	90	50	40	45	0	0	0	2	72000	1820	36	0	0.31	0	21.7365	0	0.979181	2.58	2	0	0	0	0	1	0	0	FALSE	FALSE	TRUE	FALSE	TRUE	FALSE
62	68	57	11	100	100	100	0	13	19	11	8	46	63	33	30	65	0	0	0	2	80000	1780	69	0	0.9	0	25.2493	1	0.95672	3.39667	3	0	0	0	0	1	0	0	TRUE	FALSE	TRUE	FALSE	FALSE	FALSE
65	76	56	20	100	100	100	0	9	22	2	20	68	80	61	19	25	0	0	0	2	84000	1750	55	0	0.28	0	27.4286	1	1.00484	2.18	2	0	0	0	0	0	1	0	FALSE	FALSE	FALSE	FALSE	FALSE	FALSE
66	72	63	9	99	100	99	1	15	25	1	24	93	120	77	43	20	0	0	0	2	66000	560	72	0	0.25	0	210.459	1	0.889814	1.83	2	0	0	0	0	0	1	0	FALSE	FALSE	FALSE	FALSE	FALSE	TRUE
72	114	59	55	100	100	100	0	20	48	1	47	61	93	49	44	68	0	0	0	2	58000	1620	33	0	0.7	0	22.1003	1	1.03987	2.71667	1	0	0	1	0	0	0	0	FALSE	FALSE	TRUE	FALSE	FALSE	FALSE
89	109	71	38	99	100	98	2	16	39	1	38	74	108	45	63	35	0	0	0	2	55000	1800	80	1	0.52	0	16.9753	1	1.08462	1.53667	3	1	0	0	0	NA	0	0	TRUE	FALSE	TRUE	FALSE	FALSE	TRUE
95	108	85	23	99	100	94	6	17	38	2	36	82	106	66	40	30	0	0	0	2	58000	1510	81	0	0.78	0	25.4375	1	0.946749	3.11667	2	0	1	1	0	0	1	0	FALSE	FALSE	FALSE	FALSE	FALSE	TRUE
54	77	46	31	98	100	85	15	5	21	2	19	70	84	62	22	50	0	0	0.5	2	96000	1830	66	1	0.46	2	28.6661	0	0.305674	2.21333	2	0	0	0	0	1	1	0	FALSE	TRUE	FALSE	TRUE	FALSE	FALSE
85	93	80	13	99	100	99	1	17	47	3	44	75	92	66	26	50	0	0	0	2	75000	1770	50	1	0.46	0	23.9395	0	1.16225	1.63	3	0	0	0	0	1	1	0	TRUE	FALSE	FALSE	FALSE	FALSE	FALSE
80	88	68	20	99	100	98	2	14	18	2	16	83	93	77	16	50	0	0	0	2	75000	1780	66	0	0.4	0	23.6713	0	0.960618	3.27	1	0	0	0	0	0	0	0	FALSE	FALSE	FALSE	FALSE	FALSE	FALSE
98	113	69	44	99	100	93	7	16	43	2	41	89	103	78	25	50	0	0	0	2	75000	1500	89	1	0.4	0	33.3333	1	0.960403	1.5	NA	0	0	0	0	NA	1	0	NA	FALSE	FALSE	FALSE	FALSE	FALSE
86	92	81	11	100	100	100	0	18	30	1	29	65	80	59	21	50	0	0	0	2	64000	1590	44	0	0.32	0	25.3155	1	0.985339	3.11667	NA	NA	NA	NA	NA	NA	0	1	NA	FALSE	FALSE	FALSE	FALSE	FALSE
81	93	63	30	99	100	89	11	15	22	2	20	79	94	70	24	27	0	5	0	2	70000	1660	69	1	0.4	1	25.4028	0	1.29266	1.68667	2	0	0	0	0	0	1	0	FALSE	TRUE	FALSE	FALSE	FALSE	FALSE
66	77	55	22	99	100	89	11	11	22	2	20	61	87	48	39	48	0	0	0	2	70000	1590	77	0	0.61	0	27.6888	0	0.935672	1.33	NA	NA	NA	NA	NA	NA	1	0	NA	TRUE	TRUE	FALSE	FALSE	FALSE
74	83	59	24	98	100	96	4	14	32	2	30	81	91	76	15	50	0	0	0	2	85000	1850	62	0	0.41	0	24.8356	0	0.964062	1.61333	2	0	0	0	0	1	1	0	FALSE	FALSE	FALSE	FALSE	FALSE	FALSE
53	68	42	26	99	100	97	3	18	29	2	27	57	65	50	15	40	0	0	0	2	62000	1700	42	0	0.43	0	21.4533	1	1.02318	1.61333	2	0	0	0	0	0	1	0	FALSE	FALSE	TRUE	TRUE	FALSE	FALSE
78	85	70	15	93	96	91	5	8	41	2	39	92	100	82	18	40	0	0	0	2	52000	1650	53	0	0.47	0	19.1001	1	0.998489	1.65	2	1	0	1	0	0	1	0	FALSE	FALSE	FALSE	FALSE	FALSE	FALSE
66	85	59	26	100	100	100	0	14	25	2	23	83	93	78	15	20	0	0	0	2	65000	1540	60	0	0.37	0	27.4077	1	0.998985	2.20333	1	0	0	0	0	1	1	0	FALSE	FALSE	FALSE	FALSE	FALSE	FALSE
55	74	43	31	100	100	100	0	19	32	1	31	73	89	63	26	32	0	0	0	2	72000	1770	59	0	0.32	0	22.9819	0	0.960227	2.52	1	0	0	0	0	0	0	0	FALSE	FALSE	FALSE	TRUE	FALSE	FALSE
67	79	48	31	100	100	100	0	15	30	1	29	68	84	51	33	38	0	0	0	2	53000	1710	79	0	0.58	0	18.1252	1	0.932368	2.66667	3	0	0	0	0	0	0	1	TRUE	FALSE	TRUE	TRUE	FALSE	FALSE
82	92	70	22	96	100	86	14	15	55	1	54	69	92	57	35	80	0	0	0	2	108000	1750	67	1	0.77	0	35.2653	0	1.16481	2.86667	3	1	0	0	0	0	0	0	TRUE	TRUE	FALSE	FALSE	FALSE	FALSE
51	72	44	28	99	100	98	2	18	32	1	31	65	84	52	32	42	0	0	0	2	45000	1570	53	1	0.62	0	18.2563	1	0.986273	3.48667	2	0	0	0	0	1	1	0	FALSE	FALSE	TRUE	TRUE	FALSE	FALSE
61	77	57	20	99	100	95	5	28	39	1	38	63	97	42	55	35	0	0	0	2	92000	1820	74	1	0.53	0	27.7744	0	1.03669	1.8	1	1	0	0	0	0	0	1	FALSE	FALSE	TRUE	FALSE	FALSE	FALSE
58	70	49	21	99	100	95	5	12	24	1	23	91	107	82	25	16	0	0	0	2	60000	1590	82	0	0.24	0	23.7332	1	0.941452	1.25333	NA	0	0	0	0	NA	0	0	NA	FALSE	FALSE	TRUE	FALSE	TRUE
71	103	63	40	99	100	99	1	20	75	1	74	99	109	87	22	10	0	0	0	2	67000	1740	54	1	1	0	22.1297	0	1.06805	3.31333	1	1	0	0	0	0	1	0	FALSE	FALSE	FALSE	FALSE	FALSE	TRUE
78	97	74	23	99	100	98	2	14	26	1	25	89	101	83	18	50	0	0	0	2	96000	1770	52	0	0.27	0	30.6425	0	0.984719	1.68667	1	1	0	0	0	0	1	0	FALSE	FALSE	FALSE	FALSE	FALSE	FALSE
82	100	77	23	100	100	99	1	13	27	2	25	62	106	52	54	50	0	0	0	2	76000	1830	65	0	0.68	0	22.694	0	0.958581	1.19667	1	0	0	0	0	0	1	0	FALSE	FALSE	TRUE	FALSE	FALSE	TRUE
63	78	50	28	100	100	100	0	12	31	2	29	73	98	65	33	60	0	0	0	2	69000	1700	60	0	0.9	0	23.8754	1	0.994679	3.43	1	1	1	0	0	0	0	0	FALSE	FALSE	FALSE	TRUE	FALSE	FALSE
80	88	73	15	95	100	91	9	16	31	2	29	76	91	58	33	70	0	0	0.5	2	98000	1700	51	1	0.67	2	33.91	0	0.283016	6.01667	1	0	0	0	0	1	0	0	FALSE	FALSE	FALSE	FALSE	FALSE	FALSE
80	96	73	23	99	100	96	4	17	34	1	33	55	78	41	37	50	0	0	0	2	108000	1680	58	0	0.55	0	38.2653	1	0.990787	2.46333	2	1	0	0	0	0	0	0	FALSE	FALSE	TRUE	FALSE	FALSE	FALSE
70	75	64	11	100	100	100	0	8	18	1	17	81	93	75	18	50	0	0	0	2	84000	1840	64	0	0.3	0	24.811	0	0.963754	3.76333	2	0	0	0	0	NA	1	0	FALSE	FALSE	FALSE	FALSE	FALSE	FALSE
76	87	65	22	99	100	96	4	10	36	2	34	88	95	84	11	50	0	0	0	2	107000	1770	68	0	0.33	0	34.1537	0	0.99058	4.29667	3	1	0	1	0	0	1	0	TRUE	FALSE	FALSE	FALSE	FALSE	FALSE
70	71	70	1	99	100	97	3	14	28	4	24	82	111	62	49	50	0	0	0	2	62000	1550	74	0	0.28	0	25.8065	1	0.961524	2.94667	1	0	0	0	0	0	1	0	FALSE	FALSE	FALSE	FALSE	FALSE	TRUE
79	84	77	7	99	100	97	3	14	39	3	36	83	97	77	20	50	0	0	0	2	100000	1700	70	0	0.36	0	34.6021	0	0.987264	2.54667	2	1	0	0	0	0	1	0	FALSE	FALSE	FALSE	FALSE	FALSE	FALSE
52	69	40	29	100	100	100	0	18	34	2	32	75	83	65	18	50	0	0	0	2	65000	1650	37	0	0.3	0	23.8751	1	1.03137	2.11333	1	0	0	0	0	1	1	0	FALSE	FALSE	FALSE	TRUE	FALSE	FALSE
94	100	90	10	99	100	88	12	23	39	2	37	81	100	73	27	50	0	0	0	2	76000	1650	70	1	0.62	0	27.9155	0	1.1056	2.06667	NA	NA	NA	NA	NA	NA	1	0	NA	TRUE	FALSE	FALSE	FALSE	FALSE
46	73	39	34	100	100	100	0	17	26	2	24	67	98	52	46	50	0	0	0	2	57000	1600	80	0	0.98	0	22.2656	1	0.943906	1.94667	2	1	0	0	0	0	0	0	FALSE	FALSE	TRUE	TRUE	FALSE	FALSE
76	98	68	30	100	100	100	0	15	32	2	30	59	75	50	25	40	0	0	0	2	57000	1650	66	1	0.6	0	20.9366	1	0.974116	1.88667	1	0	0	0	0	0	0	0	FALSE	FALSE	TRUE	FALSE	FALSE	FALSE
91	115	84	31	99	100	96	4	12	36	1	35	63	101	51	50	50	0	0	0	2	77000	1760	50	1	1.12	0	24.858	1	1.00196	4.88667	1	0	0	0	0	0	0	0	FALSE	FALSE	TRUE	FALSE	FALSE	FALSE
53	81	41	40	98	100	98	2	11	23	1	22	68	80	58	22	10	0	0	0	2	86000	1860	53	0	0.7	0	24.8584	0	0.966276	1.80333	2	0	0	0	0	0	0	0	FALSE	FALSE	FALSE	TRUE	FALSE	FALSE
77	126	67	59	100	100	100	0	18	29	1	28	81	108	71	37	10	0	0	0	2	79000	1690	54	0	0.58	0	27.6601	1	1.00517	2.53	1	0	0	0	0	0	0	1	FALSE	FALSE	FALSE	FALSE	TRUE	TRUE
59	112	45	67	99	100	98	2	8	35	2	33	63	65	61	4	10	0	0	0	2	93000	1830	50	1	0.42	0	27.7703	0	1.0762	2.3	2	0	0	0	0	0	0	0	FALSE	FALSE	FALSE	TRUE	FALSE	FALSE
70	82	61	21	99	100	97	3	13	23	2	21	48	67	41	26	20	0	0	0	2	96000	1700	74	1	0.55	0	33.218	0	1.0489	2.24667	2	1	0	0	0	0	0	1	FALSE	FALSE	TRUE	FALSE	FALSE	FALSE
72	88	61	27	97	100	88	12	12	36	2	34	84	106	76	30	50	0	0	0	2	98000	1780	70	0	0.5	0	30.9304	0	0.979946	1.98667	1	0	0	0	0	NA	1	0	FALSE	TRUE	FALSE	FALSE	FALSE	TRUE
76	100	71	29	99	100	97	3	26	49	2	47	76	98	63	35	45	0	0	0	2	50000	1600	62	1	0.57	0	19.5312	1	0.974065	3.20333	2	0	0	0	0	0	1	0	FALSE	FALSE	FALSE	FALSE	FALSE	FALSE
90	120	82	38	99	100	98	2	14	27	2	25	92	162	71	91	50	0	0	0	2	89000	1660	60	0	0.41	0	32.2979	0	0.987965	2.28	2	0	0	0	0	0	0	0	FALSE	FALSE	FALSE	FALSE	TRUE	TRUE
99	130	82	48	99	100	97	3	13	21	4	17	54	79	42	37	50	0	0	0	2	71000	1500	64	0	0.79	0	31.5556	0	0.978875	1.82	3	0	0	0	0	NA	0	0	TRUE	FALSE	TRUE	FALSE	TRUE	FALSE
78	96	65	31	99	100	97	3	15	28	1	27	71	96	62	34	50	0	0	0	2	65000	1540	56	0	1.1	0	27.4077	1	1.00455	2.06333	1	1	0	0	0	0	0	0	FALSE	FALSE	FALSE	FALSE	FALSE	FALSE
73	81	65	16	99	100	99	1	12	20	1	19	73	134	50	84	20	0	0	0	2	87000	1870	68	0	0.55	0	24.8792	0	0.966027	1.61333	3	1	0	0	0	1	0	0	TRUE	FALSE	TRUE	FALSE	FALSE	TRUE
71	86	56	30	99	100	98	2	11	22	1	21	77	92	68	24	10	0	0	0	2	66000	1580	48	1	0.48	0	26.4381	1	1.28427	1.61667	3	0	0	0	0	0	0	0	TRUE	FALSE	FALSE	FALSE	FALSE	FALSE
67	81	48	33	99	100	97	3	14	51	1	50	65	152	49	103	60	0	0	0	2	72000	1720	78	1	1.1	0	24.3375	0	1.01997	5.73333	1	0	0	0	0	1	0	1	FALSE	FALSE	TRUE	TRUE	FALSE	TRUE
85	127	69	58	99	100	67	33	14	39	1	38	79	94	66	28	70	0	0	0	2	76000	1600	68	0	0.78	0	29.6875	1	0.979781	2.41333	2	1	0	0	0	1	1	0	FALSE	TRUE	FALSE	FALSE	TRUE	FALSE
80	101	63	38	98	100	76	24	12	42	1	41	85	97	73	24	60	0	0	0	2	122000	1900	60	1	0.51	0	33.795	0	0.984707	2.14667	1	1	0	0	1	0	1	0	FALSE	TRUE	FALSE	FALSE	FALSE	FALSE
65	75	55	20	99	100	94	6	11	23	2	21	66	87	52	35	45	0	0	0	2	78000	1650	85	1	0.73	0	28.6501	1	0.962743	1.21333	2	1	0	0	0	0	1	0	FALSE	FALSE	TRUE	FALSE	FALSE	FALSE
84	96	81	15	99	100	98	2	16	24	1	23	76	87	69	18	40	0	0	0	2	43000	1560	59	1	0.47	0	17.6693	1	0.974468	1.07	1	1	0	1	0	0	1	0	FALSE	FALSE	FALSE	FALSE	FALSE	FALSE
92	108	61	47	99	100	89	11	17	59	2	57	76	102	50	52	50	0	0	0	2	67000	1650	46	1	0.59	0	24.6097	1	1.00491	2.83667	1	1	0	0	0	0	0	0	FALSE	TRUE	TRUE	FALSE	FALSE	FALSE
67	106	54	52	100	100	100	0	15	37	2	35	69	111	56	55	200	0	0	0	2	49000	1650	65	1	0.59	0	17.9982	1	0.966806	1.17	2	0	0	0	0	0	0	0	FALSE	FALSE	FALSE	FALSE	FALSE	TRUE
70	98	60	38	99	100	95	5	16	45	1	44	59	68	46	22	30	20	0	0	2	58000	1580	45	0	0.54	3	23.2335	1	0.707088	3.67	1	0	0	1	0	0	0	0	FALSE	FALSE	TRUE	FALSE	FALSE	FALSE
82	88	69	19	98	100	94	6	11	19	1	18	98	107	84	23	25	0	5	0	2	71000	1660	61	0	0.3	1	25.7657	0	1.1051	2.55	1	0	0	0	0	0	1	1	FALSE	FALSE	FALSE	FALSE	FALSE	TRUE
82	107	69	38	100	100	100	0	13	28	2	26	67	70	63	7	40	0	5	0	2	78000	1600	67	0	0.32	1	30.4688	0	1.0002	2.33333	1	0	0	0	0	NA	0	0	FALSE	FALSE	FALSE	FALSE	FALSE	FALSE
78	88	66	22	99	100	96	4	10	22	2	20	67	74	60	14	50	0	0	0	2	47000	1650	76	1	0.35	0	17.2635	1	0.949923	2.01333	2	0	0	0	0	0	0	0	FALSE	FALSE	FALSE	FALSE	FALSE	FALSE
58	72	52	20	100	100	100	0	10	22	1	21	59	93	48	45	25	0	5	0	2	125000	1780	75	0	0.35	1	39.4521	1	0.97952	3.29667	2	1	0	0	0	0	1	1	FALSE	FALSE	TRUE	FALSE	FALSE	FALSE
89	110	82	28	100	100	100	0	18	26	3	23	73	86	66	20	30	0	5	0	2	82000	1700	45	0	0.32	1	28.3737	1	0.819911	2.76667	1	0	0	0	0	0	0	0	FALSE	FALSE	FALSE	FALSE	FALSE	FALSE
56	65	49	16	100	100	100	0	9	30	2	28	65	79	60	19	55	0	0	0	2	69000	1790	47	1	1.14	0	21.5349	0	1.08466	1.82	1	0	0	0	0	0	0	0	FALSE	FALSE	FALSE	TRUE	FALSE	FALSE
59	72	54	18	97	100	95	5	11	34	1	33	66	107	50	57	50	0	0	0	2	85000	1750	68	1	0.56	0	27.7551	0	1.05021	2.29667	2	1	1	0	0	0	0	1	FALSE	FALSE	TRUE	FALSE	FALSE	TRUE
72	85	64	21	100	100	100	0	8	21	1	20	71	97	55	42	50	0	0	0	2	67000	1750	59	0	0.37	0	21.8776	1	0.994053	2.07	2	0	0	0	0	0	1	0	FALSE	FALSE	TRUE	FALSE	FALSE	FALSE
87	104	79	25	100	100	100	0	15	28	2	26	77	91	68	23	60	0	0	0	2	64000	1590	58	1	0.63	0	25.3155	1	0.994579	2.21667	2	1	0	0	0	0	1	0	FALSE	FALSE	FALSE	FALSE	FALSE	FALSE
64	73	52	21	99	100	94	6	16	26	1	25	65	80	59	21	45	0	0	0	2	61000	1680	65	1	0.75	0	21.6128	1	0.977172	2.26667	2	0	0	0	0	0	1	0	FALSE	FALSE	FALSE	FALSE	FALSE	FALSE
77	86	62	24	99	100	97	3	9	30	1	29	69	73	65	8	50	0	0	0	2	79000	1730	63	0	0.31	0	26.3958	0	0.968104	1.49667	2	0	0	0	0	0	1	0	FALSE	FALSE	FALSE	FALSE	FALSE	FALSE
72	86	66	20	100	100	100	0	17	27	1	26	71	90	60	30	60	0	0	0	2	80000	1680	80	0	0.78	0	28.3447	1	0.957333	2.06667	1	1	0	0	0	0	1	0	FALSE	FALSE	FALSE	FALSE	FALSE	FALSE
64	74	58	16	96	97	95	2	21	34	2	32	78	92	64	28	50	0	0	0	2	62000	1700	60	0	0.59	0	21.4533	0	0.947708	2.43667	3	0	0	0	0	NA	0	1	TRUE	FALSE	FALSE	FALSE	FALSE	FALSE
73	90	63	27	100	100	100	0	19	38	2	36	65	78	54	24	70	0	0	0	2	68000	1710	37	0	0.6	0	23.255	1	1.03153	2.86333	1	0	0	0	0	0	1	1	FALSE	FALSE	TRUE	FALSE	FALSE	FALSE
61	68	58	10	93	96	91	5	21	29	2	27	73	89	63	26	50	0	0	0	2	73000	1730	64	0	0.31	0	24.3911	1	0.995726	2.21333	3	0	1	0	1	0	0	0	TRUE	FALSE	FALSE	FALSE	FALSE	FALSE
77	91	69	22	99	100	93	7	15	37	2	35	72	87	65	22	50	0	0	0	2	113000	1870	58	0	0.35	0	32.3143	0	0.989232	2.18	2	1	0	0	0	0	1	1	FALSE	FALSE	FALSE	FALSE	FALSE	FALSE
60	72	51	21	99	100	96	4	8	26	2	24	58	79	46	33	40	0	0	0	2	70000	1590	51	0	0.56	0	27.6888	1	0.991397	1.16333	4	1	0	0	0	0	1	1	TRUE	FALSE	TRUE	FALSE	FALSE	FALSE
62	87	55	32	99	100	99	1	14	24	1	23	78	96	67	29	50	0	0	0	2	85000	1860	43	0	0.72	0	24.5693	0	0.972384	4.23333	1	1	0	0	0	0	0	0	FALSE	FALSE	FALSE	FALSE	FALSE	FALSE
66	76	58	18	100	100	100	0	20	42	1	41	59	72	43	29	50	0	0	0	2	68000	1680	83	0	0.23	0	24.093	0	0.972825	1.09667	3	0	0	0	0	0	0	0	TRUE	FALSE	TRUE	FALSE	FALSE	FALSE
73	90	66	24	100	100	100	0	1	2	1	1	53	62	47	15	50	0	0	0	2	104000	1670	29	0	0.41	0	37.2907	1	1.02288	2.46333	4	0	0	0	0	1	1	0	TRUE	FALSE	TRUE	FALSE	FALSE	FALSE
66	83	49	34	100	100	98	2	12	47	1	46	48	74	19	55	100	0	0	0	2	74500	1690	80	0	1.34	0	26.0845	0	0.978391	2.25333	3	1	0	0	0	0	1	1	TRUE	FALSE	TRUE	TRUE	FALSE	FALSE
67	81	59	22	99	100	98	2	13	23	1	22	87	125	61	64	40	0	0	0	2	80000	1740	70	1	0.6	0	26.4236	1	0.980754	4.11333	2	1	0	0	0	0	1	0	FALSE	FALSE	FALSE	FALSE	FALSE	TRUE
65	84	55	29	100	100	100	0	16	41	1	40	59	71	48	23	35	0	0	0	2	65000	1730	42	0	0.47	0	21.7181	1	1.02295	3.45	1	0	0	0	0	0	0	0	FALSE	FALSE	TRUE	FALSE	FALSE	FALSE
66	110	53	57	100	100	100	0	11	30	1	29	61	77	48	29	50	0	0	0	2	59000	1710	25	0	0.68	0	20.1771	0	0.993081	3.04667	1	0	0	0	0	1	0	0	FALSE	FALSE	TRUE	FALSE	FALSE	FALSE
63	81	55	26	99	100	96	4	16	48	1	47	85	104	60	44	20	0	0	0	2	67000	1580	72	1	0.55	0	26.8386	1	0.978882	2.97	2	1	0	0	0	0	0	0	FALSE	FALSE	FALSE	FALSE	FALSE	FALSE
65	89	57	32	100	100	100	0	14	25	1	24	98	108	74	34	50	0	0	0	2	85000	1700	50	1	0.82	0	29.4118	1	1.00022	2.27	2	0	0	1	0	NA	1	0	FALSE	FALSE	FALSE	FALSE	FALSE	TRUE
80	95	76	19	99	100	94	6	12	40	1	39	80	98	69	29	20	0	0	0	2	75000	1740	78	0	0.4	0	24.7721	0	0.960229	2.62	1	1	0	1	0	0	0	0	FALSE	FALSE	FALSE	FALSE	FALSE	FALSE
64	102	56	46	98	100	96	4	14	76	1	75	68	114	46	68	20	0	0	0	2	55000	1590	61	1	0.53	0	21.7555	1	0.98195	2.58333	2	0	0	0	0	0	1	0	FALSE	FALSE	TRUE	FALSE	FALSE	TRUE
74	112	54	58	99	100	96	4	20	33	1	32	81	108	65	43	45	0	0	0	2	72000	1640	58	0	0.68	0	26.7698	1	1.00267	2.43333	2	1	0	0	0	0	1	1	FALSE	FALSE	FALSE	FALSE	FALSE	TRUE
66	82	60	22	100	100	100	0	23	32	1	31	96	131	77	54	35	0	0	0	2	101000	1660	51	0	0.55	0	36.6526	1	0.996626	1.81667	1	1	1	0	0	1	0	0	FALSE	FALSE	FALSE	FALSE	FALSE	TRUE
52	69	46	23	100	100	100	0	13	23	1	22	56	72	47	25	40	0	0	0	2	68000	1650	81	0	0.63	0	24.977	1	0.945387	1.16333	1	0	0	0	0	0	0	1	FALSE	FALSE	TRUE	TRUE	FALSE	FALSE
67	79	63	16	99	100	96	4	16	30	1	29	63	106	47	59	38	0	0	0	2	80000	1600	54	0	0.61	0	31.25	1	1.00514	2.14667	2	1	0	0	0	0	0	0	FALSE	FALSE	TRUE	FALSE	FALSE	TRUE
69	79	57	22	100	100	100	0	8	27	1	26	62	91	49	42	40	0	0	0	2	81000	1730	83	0	0.4	0	27.0641	0	0.982804	1.74667	3	0	0	0	0	0	0	0	TRUE	FALSE	TRUE	FALSE	FALSE	FALSE
71	80	63	17	99	100	98	2	11	17	2	15	80	104	67	37	53	0	0	0	2	79000	1740	58	0	0.81	0	26.0933	0	0.960072	4.06333	3	1	0	0	0	0	0	0	TRUE	FALSE	FALSE	FALSE	FALSE	FALSE
84	94	74	20	99	100	99	1	14	35	3	32	79	98	71	27	40	0	0	0	2	80000	1700	50	0	0.5	0	27.6817	0	0.975126	2.38333	1	0	0	0	0	0	0	0	FALSE	FALSE	FALSE	FALSE	FALSE	FALSE
84	116	65	51	99	100	94	6	14	38	1	37	48	82	32	50	75	0	0	0.5	2	101000	1840	25	1	0.91	2	29.8322	0	0.231705	2.56333	2	0	0	0	0	0	1	0	FALSE	FALSE	TRUE	FALSE	FALSE	FALSE
68	142	45	97	97	100	89	11	11	27	1	26	88	132	69	63	50	0	0	0.5	2	72000	1700	58	1	0.43	2	24.9135	1	0.402974	2.31333	1	0	0	0	0	0	1	0	FALSE	TRUE	FALSE	TRUE	TRUE	TRUE
59	86	51	35	99	100	99	1	14	27	2	25	85	138	70	68	50	0	0	0	2	92000	1910	58	0	0.4	0	25.2186	0	0.965667	2.85333	2	1	0	0	0	0	1	0	FALSE	FALSE	FALSE	FALSE	FALSE	TRUE
62	78	57	21	99	100	96	4	18	29	2	27	65	95	50	45	50	0	0	0	2	67000	1700	83	0	0.54	0	23.1834	1	0.93902	2.42	1	1	1	0	0	1	1	0	FALSE	FALSE	TRUE	FALSE	FALSE	FALSE
83	103	69	34	99	100	96	4	18	35	1	34	88	125	80	45	40	0	0	0	2	76000	1780	71	0	0.43	0	23.9869	0	0.960527	2.14667	2	0	0	0	0	0	1	0	FALSE	FALSE	FALSE	FALSE	FALSE	TRUE
67	83	64	19	99	100	98	2	14	21	1	20	67	85	57	28	50	0	0	0	2	64000	1650	62	0	0.55	0	23.5078	1	1.08409	0.75	1	1	0	0	1	0	0	1	FALSE	FALSE	FALSE	FALSE	FALSE	FALSE
49	62	40	22	99	100	90	10	16	22	1	21	64	75	54	21	50	0	0	0	2	70000	1650	69	0	0.37	0	25.7117	0	0.965329	4.01667	2	1	0	0	0	0	1	0	FALSE	TRUE	TRUE	TRUE	FALSE	FALSE
63	73	55	18	99	100	99	1	13	27	1	26	65	72	58	14	50	0	0	0	2	78000	1650	52	1	0.72	0	28.6501	1	1.26497	3.40333	4	0	0	0	0	0	1	0	TRUE	FALSE	FALSE	FALSE	FALSE	FALSE
76	102	64	38	100	100	100	0	15	28	2	26	62	93	42	51	50	0	0	0	2	73000	1620	72	0	0.35	0	27.8159	0	0.973164	1.6	1	1	0	0	0	0	1	0	FALSE	FALSE	TRUE	FALSE	FALSE	FALSE
91	113	67	46	99	100	95	5	16	44	1	43	77	115	42	73	100	0	0	0	2	61000	1640	64	0	0.53	0	22.68	1	0.982521	2.88	2	0	0	0	0	0	0	0	FALSE	FALSE	TRUE	FALSE	FALSE	TRUE
106	133	89	44	99	100	81	19	13	31	1	30	93	123	66	57	100	0	0	0	2	131000	1920	68	0	0.75	0	35.536	0	0.990722	2.00333	1	0	0	0	0	NA	1	0	FALSE	TRUE	FALSE	FALSE	TRUE	TRUE
69	88	61	27	99	100	98	2	18	47	1	46	78	99	67	32	45	0	0	0	2	71000	1670	40	0	0.52	0	25.4581	0	0.978019	1.96667	2	0	0	0	0	0	0	0	FALSE	FALSE	FALSE	FALSE	FALSE	FALSE
69	87	64	23	99	100	99	1	17	23	1	22	48	63	40	23	50	0	0	0	2	64000	1680	26	0	0.3	0	22.6757	1	1.05229	1.35333	2	0	0	0	0	1	0	0	FALSE	FALSE	TRUE	FALSE	FALSE	FALSE
90	122	80	42	99	100	96	4	18	37	1	36	51	82	41	41	65	0	0	0	2	95000	1700	23	1	0.55	0	32.872	1	0.996622	2.66667	1	0	0	0	0	0	0	0	FALSE	FALSE	TRUE	FALSE	TRUE	FALSE
69	81	63	18	100	100	100	0	16	27	9	18	76	93	67	26	50	0	0	0	2	76000	1800	69	1	0.65	0	23.4568	0	0.966962	1.88	1	0	0	0	1	0	1	0	FALSE	FALSE	FALSE	FALSE	FALSE	FALSE
69	103	62	41	99	100	97	3	10	31	2	29	92	129	77	52	50	0	0	0	2	58700	1540	70	1	0.53	0	24.7512	1	0.977406	2.71667	1	1	0	0	0	0	0	0	FALSE	FALSE	FALSE	FALSE	FALSE	TRUE
92	100	80	20	100	100	100	0	18	31	3	28	80	93	71	22	50	0	0	0	2	112000	1750	50	0	0.42	0	36.5714	0	0.974408	2.08667	3	1	0	1	0	0	1	0	TRUE	FALSE	FALSE	FALSE	FALSE	FALSE
75	110	48	62	100	100	100	0	16	33	1	32	73	88	62	26	47	0	0	0	2	53000	1750	20	1	0.85	0	17.3061	1	1.05425	2.04667	1	0	0	0	0	0	0	0	FALSE	FALSE	FALSE	TRUE	FALSE	FALSE
92	112	66	46	100	100	100	0	20	38	2	36	81	104	71	33	90	0	0	0	2	105000	1750	31	0	0.65	0	34.2857	0	1.00024	2.50333	NA	0	0	0	0	1	0	0	NA	FALSE	FALSE	FALSE	FALSE	FALSE
98	123	90	33	99	100	98	2	16	29	2	27	70	88	64	24	50	0	0	0	2	104000	1580	28	1	0.68	0	41.66	1	0.983718	2.11667	2	0	0	0	0	0	1	0	FALSE	FALSE	FALSE	FALSE	TRUE	FALSE
60	65	59	6	98	100	96	4	23	30	5	25	51	69	34	35	50	0	0	0	2	95000	1780	85	0	0.62	0	29.9836	0	0.927372	1.28667	NA	NA	NA	NA	NA	NA	NA	NA	NA	FALSE	TRUE	FALSE	FALSE	FALSE
116	130	105	25	100	100	100	0	11	34	2	32	87	102	74	28	50	0	0	0	2	53000	1620	63	0	0.3	0	20.1951	0	0.953739	1.08667	2	1	0	1	0	0	1	0	FALSE	FALSE	FALSE	FALSE	TRUE	FALSE
87	104	74	30	100	100	100	0	21	59	1	58	78	93	64	29	70	0	0	0	2	90000	1830	37	0	0.8	0	26.8745	1	1.02283	2.15333	3	0	0	0	0	1	0	0	TRUE	FALSE	FALSE	FALSE	FALSE	FALSE
73	84	67	17	96	99	89	10	10	24	1	23	71	77	65	12	50	0	0	0	2	100000	1720	70	1	0.59	0	33.8021	0	1.06241	3.45333	2	0	0	0	0	1	0	0	FALSE	TRUE	FALSE	FALSE	FALSE	FALSE
99	115	82	33	99	100	97	3	9	40	1	39	92	112	80	32	50	0	0	0	2	78000	1640	70	0	0.4	0	29.0006	1	0.974093	3.08	1	1	0	0	0	0	1	0	FALSE	FALSE	FALSE	FALSE	FALSE	TRUE
95	107	83	24	100	100	100	0	16	32	1	31	77	97	63	34	30	0	0	0	2	69000	1600	79	0	0.33	0	26.9531	0	0.931906	1.81667	NA	NA	NA	NA	NA	NA	0	0	NA	FALSE	FALSE	FALSE	FALSE	FALSE
70	84	66	18	99	100	95	5	12	21	1	20	98	149	78	71	40	0	0	0	2	120000	1860	66	0	0.4	0	34.6861	0	0.989675	2.35333	1	1	0	0	0	0	0	0	FALSE	FALSE	FALSE	FALSE	FALSE	TRUE
85	93	67	26	100	100	100	0	14	63	2	61	80	90	75	15	10	0	0	0	2	100000	1840	57	0	0.47	0	29.5369	0	0.966703	3.13333	4	0	0	0	0	0	0	0	TRUE	FALSE	FALSE	FALSE	FALSE	FALSE
56	72	46	26	100	100	99	1	25	37	2	35	91	105	75	30	20	0	0	0	2	78000	1800	65	0	1.12	0	24.0741	0	0.960116	2.6	3	0	0	0	0	0	0	1	TRUE	FALSE	FALSE	TRUE	FALSE	TRUE
69	99	59	40	99	100	91	9	14	26	2	24	90	124	73	51	10	0	0	0	2	86000	1540	67	1	0.67	0	36.2624	1	0.989631	2.38333	2	1	0	0	0	0	0	0	FALSE	FALSE	FALSE	FALSE	FALSE	TRUE
52	77	44	33	100	100	99	1	15	27	2	25	64	90	56	34	20	0	0	0	2	90000	1750	79	0	1.1	0	29.3878	0	0.972819	2.17	1	0	0	0	0	0	1	1	FALSE	FALSE	FALSE	TRUE	FALSE	FALSE
92	105	88	17	100	100	100	0	13	22	6	16	81	92	72	20	10	0	0	0	2	67000	1640	57	0	0.4	0	24.9108	0	0.965088	1.33333	2	0	0	0	0	1	0	0	FALSE	FALSE	FALSE	FALSE	FALSE	FALSE
71	91	62	29	100	100	100	0	20	27	1	26	46	59	40	19	35	0	0	0	2	85000	1780	53	0	0.51	0	26.8274	0	0.971321	2.81333	1	1	0	0	0	0	1	1	FALSE	FALSE	TRUE	FALSE	FALSE	FALSE
62	76	44	32	100	100	100	0	9	16	1	15	79	93	66	27	20	0	0	0	2	85000	1550	68	0	0.92	0	35.3798	1	0.983758	2.2	1	0	0	0	0	0	1	0	FALSE	FALSE	FALSE	TRUE	FALSE	FALSE
69	92	58	34	100	100	100	0	13	30	1	29	63	89	49	40	40	0	3	0	2	60000	1710	66	0	0.71	1	20.5191	1	0.927396	3.66333	1	0	0	0	0	0	1	1	FALSE	FALSE	TRUE	FALSE	FALSE	FALSE
59	70	56	14	99	100	99	1	14	47	1	46	76	95	63	32	50	0	3	0	2	78000	1720	68	0	0.58	1	26.3656	0	1.07606	4.56333	1	0	0	1	0	1	1	1	FALSE	FALSE	FALSE	FALSE	FALSE	FALSE
72	79	67	12	99	100	90	10	14	53	1	52	92	98	85	13	85	0	0	0.5	2	71000	1530	79	0	0.49	2	30.3302	1	2.04643	2.82	3	1	0	0	0	0	1	0	TRUE	TRUE	FALSE	FALSE	FALSE	FALSE
87	124	74	50	99	100	97	3	12	35	2	33	61	79	50	29	70	0	0	0	2	59000	1710	21	1	0.73	0	20.1771	1	1.04432	2.3	1	0	0	0	0	0	1	0	FALSE	FALSE	TRUE	FALSE	TRUE	FALSE
72	83	66	17	99	100	99	1	20	25	2	23	75	86	69	17	30	0	0	0	2	61000	1550	86	0	0.4	0	25.3902	1	0.939015	1.59667	3	0	0	0	0	0	0	0	TRUE	FALSE	FALSE	FALSE	FALSE	FALSE
86	98	77	21	97	100	94	6	12	24	1	23	65	96	46	50	100	0	5	0	2	90000	1660	52	1	0.61	1	32.6608	1	0.470372	2.03	4	1	0	0	0	0	0	0	TRUE	FALSE	TRUE	FALSE	FALSE	FALSE
82	93	72	21	99	100	99	1	20	52	2	50	65	74	57	17	50	0	0	0	2	62000	1540	61	1	0.6	0	26.1427	1	0.992335	2.26667	2	0	0	0	0	0	0	0	FALSE	FALSE	FALSE	FALSE	FALSE	FALSE
67	80	60	20	99	100	99	1	14	22	1	21	48	65	42	23	40	0	0	0	2	89000	1800	48	0	0.43	0	27.4691	0	0.952683	1.95	3	0	0	0	0	0	0	0	TRUE	FALSE	TRUE	FALSE	FALSE	FALSE
78	82	75	7	100	100	100	0	18	45	1	44	77	87	66	21	20	0	0	0	2	63000	1720	63	1	0.5	0	21.2953	1	0.978524	2.63667	2	0	0	0	0	0	1	0	FALSE	FALSE	FALSE	FALSE	FALSE	FALSE
59	94	50	44	99	100	98	2	11	66	2	64	75	101	54	47	10	0	0	0	2	56000	1660	60	1	0.69	0	20.3223	1	0.979046	1.90333	1	0	0	0	0	0	1	0	FALSE	FALSE	TRUE	TRUE	FALSE	FALSE
68	84	58	26	98	100	92	8	11	25	2	23	85	103	76	27	10	0	0	0	2	85000	1750	70	1	0.62	0	27.7551	0	1.14459	2.58667	3	1	0	0	0	0	1	0	TRUE	FALSE	FALSE	FALSE	FALSE	FALSE
83	113	68	45	99	100	95	5	10	64	2	62	79	96	67	29	10	0	0	0	2	68000	1680	59	1	0.35	0	24.093	1	0.99167	1.10333	1	0	0	0	0	0	0	0	FALSE	FALSE	FALSE	FALSE	FALSE	FALSE
83	97	71	26	98	100	96	4	12	25	1	24	82	107	57	50	50	0	0	0.5	2	105000	1860	47	1	0.78	2	30.3503	0	0.263713	2.53333	2	0	0	0	0	1	0	1	FALSE	FALSE	FALSE	FALSE	FALSE	TRUE
72	96	61	35	99	100	69	31	14	39	1	38	71	102	57	45	25	0	0	0	2	66000	1630	50	1	0.5	0	24.841	1	1.00191	2.7	1	0	0	0	0	0	1	0	FALSE	TRUE	FALSE	FALSE	FALSE	FALSE
72	81	57	24	100	100	100	0	10	21	1	20	73	97	65	32	20	0	0	0	2	70000	1720	81	0	0.45	0	23.6614	0	0.955234	1.98333	2	1	0	0	0	0	1	0	FALSE	FALSE	FALSE	FALSE	FALSE	FALSE
90	116	68	48	99	100	75	25	15	33	1	32	59	85	43	42	90	0	0	0	2	95000	1700	84	1	0.55	0	32.872	0	1.02072	1.38	2	1	1	0	0	0	0	0	FALSE	TRUE	TRUE	FALSE	FALSE	FALSE
65	75	43	32	99	100	96	4	13	62	1	61	73	99	56	43	45	0	0	0	2	82000	1690	68	0	0.63	0	28.7105	1	0.978834	2.01333	2	0	0	0	0	0	0	1	FALSE	FALSE	FALSE	TRUE	FALSE	FALSE
69	96	62	34	99	100	94	6	19	52	1	51	62	74	57	17	50	0	0	0	2	60000	1700	40	0	0.73	0	20.7612	1	1.02613	2.24667	1	0	0	0	0	0	0	0	FALSE	FALSE	FALSE	FALSE	FALSE	FALSE
76	113	62	51	100	100	100	0	18	34	1	33	67	87	53	34	60	0	0	0	2	63000	1710	74	0	0.72	0	21.5451	1	0.95737	1.78333	2	0	0	0	0	0	1	1	FALSE	FALSE	TRUE	FALSE	FALSE	FALSE
64	77	51	26	99	100	97	3	18	31	2	29	70	78	64	14	50	0	0	0	2	56000	1600	48	1	0.3	0	21.875	1	0.999337	2.06333	2	0	0	0	0	1	1	0	FALSE	FALSE	FALSE	FALSE	FALSE	FALSE
72	82	53	29	99	100	96	4	12	27	2	25	78	94	70	24	50	0	0	0	2	72000	1680	59	0	0.4	0	25.5102	0	0.966319	1.66333	2	0	0	1	0	0	1	0	FALSE	FALSE	FALSE	FALSE	FALSE	FALSE
81	103	70	33	99	100	92	8	15	45	2	43	94	157	71	86	50	0	0	0	2	61000	1640	82	1	0.6	0	22.68	1	0.942245	2.18667	3	0	1	0	1	0	1	0	TRUE	FALSE	FALSE	FALSE	FALSE	TRUE
93	122	76	46	99	100	86	14	19	43	2	41	84	112	65	47	50	0	0	0	2	92000	1730	20	1	0.55	0	30.7394	1	1.0062	1.99667	1	0	0	0	0	0	1	0	FALSE	TRUE	FALSE	FALSE	TRUE	TRUE
89	102	77	25	100	100	100	0	19	29	2	27	84	106	73	33	50	0	0	0	2	80000	1650	34	0	0.57	0	29.3848	1	1.01312	1.08333	NA	NA	NA	NA	NA	NA	1	0	NA	FALSE	FALSE	FALSE	FALSE	TRUE
66	87	53	34	98	100	94	6	12	47	1	46	57	72	51	21	100	0	0	0.5	2	82000	1780	29	1	1.08	2	25.8806	0	0.227719	3.94667	1	0	0	0	0	0	1	1	FALSE	FALSE	TRUE	FALSE	FALSE	FALSE
82	136	66	70	100	100	100	0	14	33	1	32	82	98	66	32	35	0	0	0	2	39000	1550	70	1	0.48	0	16.2331	1	0.956263	2.56333	2	1	0	0	0	0	1	0	FALSE	FALSE	FALSE	FALSE	TRUE	FALSE
80	93	68	25	99	100	97	3	14	49	1	48	77	88	67	21	30	0	0	0	2	55000	1570	61	0	0.4	0	22.3133	1	0.990254	1.68	2	0	1	0	0	0	1	0	FALSE	FALSE	FALSE	FALSE	FALSE	FALSE
92	109	81	28	100	100	100	0	19	41	2	39	76	96	60	36	100	0	0	0	2	85000	1650	44	0	0.49	0	31.2213	0	0.955953	2.75333	3	0	0	0	0	0	1	0	TRUE	FALSE	FALSE	FALSE	FALSE	FALSE
84	98	78	20	92	97	84	13	18	28	2	26	90	127	79	48	100	0	0	0	2	58000	1610	56	1	0.81	0	22.3757	1	0.989524	2.24667	1	0	0	1	0	NA	1	0	FALSE	TRUE	FALSE	FALSE	FALSE	TRUE
62	80	57	23	100	100	99	1	11	46	1	45	58	79	44	35	50	0	0	0	2	97000	1820	79	1	0.72	0	29.2839	1	0.974193	3.23333	2	1	0	0	0	0	0	0	FALSE	FALSE	TRUE	FALSE	FALSE	FALSE
74	96	69	27	99	100	97	3	12	64	3	61	55	63	52	11	50	0	0	0.5	2	64000	1610	43	1	0.67	2	24.6904	0	0.246746	2.18333	1	0	0	0	0	0	0	0	FALSE	FALSE	TRUE	FALSE	FALSE	FALSE
62	68	54	14	100	100	100	0	9	23	1	22	62	67	58	9	30	0	0	0	2	67000	1750	70	0	0.28	0	21.8776	0	0.954729	1.5	2	1	0	0	0	0	1	0	FALSE	FALSE	FALSE	FALSE	FALSE	FALSE
92	113	76	37	100	100	100	0	11	26	1	25	88	118	77	41	40	0	0	0	2	60000	1590	59	0	0.46	0	23.7332	1	0.996686	1.76333	2	0	0	0	0	0	1	0	FALSE	FALSE	FALSE	FALSE	FALSE	TRUE
62	71	51	20	96	100	86	14	14	24	2	22	50	57	42	15	40	0	0	0	2	82000	1720	67	1	0.6	0	27.7177	1	0.987831	4.25	2	1	0	0	0	0	0	0	FALSE	TRUE	TRUE	FALSE	FALSE	FALSE
58	69	50	19	99	100	96	4	11	15	7	8	57	68	49	19	40	0	0	0	2	58000	1700	70	0	0.42	0	20.0692	0	1.01997	3.55	1	1	0	1	1	0	0	0	FALSE	FALSE	TRUE	TRUE	FALSE	FALSE
65	72	56	16	100	100	100	0	13	20	1	19	60	78	50	28	35	0	0	0	2	68000	1730	43	0	0.47	0	22.7204	1	1.0207	2.86667	2	0	0	0	0	0	0	0	FALSE	FALSE	TRUE	FALSE	FALSE	FALSE
63	76	59	17	99	100	99	1	11	16	1	15	82	90	71	19	30	0	0	0	2	88000	1800	63	0	0.35	0	27.1605	0	0.970209	2.53667	1	1	0	0	0	0	1	1	FALSE	FALSE	FALSE	FALSE	FALSE	FALSE
66	75	59	16	99	100	98	2	12	21	1	20	76	85	64	21	25	0	0	0	2	56000	1600	71	0	0.23	0	21.875	0	0.954023	4.8	2	1	0	0	0	0	0	0	FALSE	FALSE	FALSE	FALSE	FALSE	FALSE
73	88	65	23	99	100	96	4	11	21	1	20	92	117	70	47	20	0	0	0	2	80000	1480	83	0	0.47	0	36.523	1	0.971973	1.9	1	1	0	0	0	0	0	0	FALSE	FALSE	FALSE	FALSE	FALSE	TRUE
73	102	40	62	99	100	98	2	11	26	1	25	72	98	51	47	40	0	0	0	2	57000	1680	59	0	0.58	0	20.1956	1	0.960306	1.86333	4	0	0	0	0	1	1	0	TRUE	FALSE	TRUE	TRUE	FALSE	FALSE
75	93	71	22	99	100	99	1	11	35	1	34	63	105	53	52	30	0	0	0	2	87000	1700	65	0	0.63	0	30.1038	0	0.981099	2.61333	2	1	0	0	0	0	0	0	FALSE	FALSE	TRUE	FALSE	FALSE	TRUE
77	102	66	36	99	100	98	2	20	40	2	38	61	72	53	19	30	0	0	0	2	83000	1630	80	0	0.4	0	31.2394	1	0.967077	1.33667	1	1	0	0	0	0	0	0	FALSE	FALSE	TRUE	FALSE	FALSE	FALSE
51	57	49	8	97	100	96	4	15	27	1	26	60	93	47	46	30	0	0	0	2	43000	1640	67	0	0.32	0	15.9875	1	0.96981	1.88333	2	0	0	0	0	0	0	0	FALSE	FALSE	TRUE	TRUE	FALSE	FALSE
82	110	64	46	100	100	100	0	12	48	2	46	57	85	45	40	50	0	0	0	2	65000	1700	27	0	0.56	0	22.4913	1	1.05135	2.99667	2	0	0	0	0	0	0	0	FALSE	FALSE	TRUE	FALSE	FALSE	FALSE
63	102	50	52	100	100	100	0	14	40	2	38	56	83	49	34	70	0	0	0	2	80000	1800	17	0	0.7	0	24.6914	0	1.00776	4.63	1	0	0	0	0	1	1	0	FALSE	FALSE	TRUE	TRUE	FALSE	FALSE
60	80	51	29	100	100	100	0	15	33	2	31	53	75	47	28	50	25	0	0	2	64000	1700	24	0	0.6	3	22.1453	0	0.783192	1.51333	NA	NA	NA	NA	NA	NA	0	0	NA	FALSE	TRUE	FALSE	FALSE	FALSE
72	105	64	41	99	100	96	4	16	50	5	45	74	111	61	50	40	0	0	0	2	115000	1910	49	1	0.5	0	31.5233	0	1.1918	2.52	3	0	0	0	0	0	1	1	TRUE	FALSE	FALSE	FALSE	FALSE	TRUE
73	87	59	28	93	100	82	18	14	109	1	108	72	90	59	31	50	0	0	0	2	57000	1520	69	1	0.62	0	24.6711	1	0.978555	2.20333	2	1	0	1	0	0	0	0	FALSE	TRUE	FALSE	FALSE	FALSE	FALSE
77	96	62	34	90	99	70	29	16	41	1	40	72	95	60	35	30	0	0	0	2	80000	1800	73	1	0.74	0	24.6914	0	1.03301	1.18667	2	0	0	1	0	1	1	0	FALSE	TRUE	FALSE	FALSE	FALSE	FALSE
83	98	77	21	99	100	97	3	10	23	1	22	81	98	67	31	30	0	5	0	2	50000	1520	72	0	0.55	1	21.6413	1	1.02175	3.13333	2	0	0	0	0	0	0	0	FALSE	FALSE	FALSE	FALSE	FALSE	FALSE
82	103	69	34	100	100	100	0	15	33	1	32	54	68	42	26	30	0	5	0	2	62000	1750	42	0	0.5	1	20.2449	1	0.75305	1.81333	2	0	0	0	0	0	0	0	FALSE	FALSE	TRUE	FALSE	FALSE	FALSE
72	86	68	18	99	100	96	4	13	21	1	20	47	64	34	30	30	0	3	0	2	52000	1670	65	0	0.53	1	18.6453	1	0.911888	1.94667	1	1	0	1	0	1	0	0	FALSE	FALSE	TRUE	FALSE	FALSE	FALSE
72	83	59	24	99	100	98	2	22	47	1	46	50	79	32	47	30	0	3	0	2	47000	1600	67	0	0.67	1	18.3594	1	0.940592	2.53667	1	0	0	0	0	0	1	1	FALSE	FALSE	TRUE	FALSE	FALSE	FALSE
79	94	68	26	99	100	93	7	16	26	1	25	83	91	76	15	30	0	5	0	2	62000	1640	38	0	0.5	1	23.0518	1	0.743852	2.31333	2	1	0	0	0	0	0	0	FALSE	FALSE	FALSE	FALSE	FALSE	FALSE
69	77	66	11	100	100	100	0	11	23	1	22	55	64	50	14	30	0	5	0	2	64000	1590	52	0	0.55	1	25.3155	1	0.821052	1.76667	1	0	0	0	0	1	1	0	FALSE	FALSE	TRUE	FALSE	FALSE	FALSE
78	97	68	29	100	100	100	0	17	34	3	31	98	120	86	34	50	25	0	0	2	68000	1580	52	0	0.77	3	27.2392	1	0.756125	3.03667	2	0	0	0	0	0	0	0	FALSE	FALSE	FALSE	FALSE	FALSE	TRUE
60	67	60	7	100	100	100	0	16	30	2	28	59	73	50	23	50	0	0	0	2	73000	1700	67	0	0.58	0	25.2595	0	0.964451	2.61667	1	0	1	1	0	0	1	1	FALSE	FALSE	TRUE	FALSE	FALSE	FALSE
77	94	68	26	99	100	96	4	20	31	3	28	74	89	68	21	50	0	0	0	2	100000	1700	52	0	0.44	0	34.6021	1	1.00104	1.93667	1	1	0	0	0	0	0	0	FALSE	FALSE	FALSE	FALSE	FALSE	FALSE
60	70	57	13	100	100	100	0	20	32	3	29	54	82	41	41	50	0	0	0	2	72000	1700	76	0	0.42	0	24.9135	0	0.973003	1.78333	3	1	0	0	0	0	1	0	TRUE	FALSE	TRUE	FALSE	FALSE	FALSE
62	77	55	22	98	100	69	31	11	32	1	31	71	113	57	56	20	0	0	0	2	110000	1600	72	1	0.9	0	42.9688	0	1.07083	2.32	1	0	0	1	0	0	0	0	FALSE	TRUE	FALSE	FALSE	FALSE	TRUE
65	102	44	58	99	100	95	5	14	27	1	26	82	102	69	33	50	0	5	0	2	77000	1620	43	0	0.43	1	29.34	0	1.06986	1.28333	1	1	0	0	0	0	0	0	FALSE	FALSE	FALSE	TRUE	FALSE	FALSE
105	118	99	19	100	100	100	0	18	28	1	27	59	71	54	17	50	0	5	0	2	40000	1550	54	1	0.68	1	16.6493	1	1.26071	1.38333	2	0	0	1	0	0	0	1	FALSE	FALSE	TRUE	FALSE	FALSE	FALSE
68	82	59	23	99	100	99	1	18	32	5	27	69	95	54	41	50	25	0	0	2	65000	1610	54	0	0.58	3	25.0762	1	0.783363	2.55	2	0	0	1	0	0	0	0	FALSE	FALSE	TRUE	FALSE	FALSE	FALSE
83	104	57	47	100	100	100	0	23	36	2	34	61	80	42	38	50	25	0	0	2	43000	1640	22	0	0.52	3	15.9875	1	0.550087	1.91667	1	0	0	0	0	NA	0	0	FALSE	FALSE	TRUE	FALSE	FALSE	FALSE
78	112	53	59	100	100	100	0	22	52	1	51	63	103	46	57	82	0	0	0	2	82000	1820	27	1	1.2	0	24.7555	0	1.10797	4.54667	1	0	0	0	0	0	0	0	FALSE	FALSE	TRUE	FALSE	FALSE	FALSE
66	80	60	20	100	100	100	0	15	18	9	9	66	90	53	37	40	0	0	0	2	70000	1670	66	0	0.47	0	25.0995	1	0.979838	2.17	1	0	0	0	0	0	0	0	FALSE	FALSE	TRUE	FALSE	FALSE	FALSE
70	101	60	41	100	100	100	0	16	43	2	41	81	91	70	21	45	0	0	0	2	85000	1830	45	0	0.38	0	25.3815	0	0.972133	1.58	1	0	0	0	0	0	0	0	FALSE	FALSE	FALSE	FALSE	FALSE	FALSE
82	101	71	30	99	100	99	1	22	31	2	29	55	66	44	22	50	0	0	0	2	66000	560	28	1	0.63	0	210.459	1	0.917958	3.81333	2	0	0	1	0	0	0	0	FALSE	FALSE	TRUE	FALSE	FALSE	FALSE
54	62	49	13	99	100	99	1	15	23	2	21	72	78	67	11	40	0	0	0	2	64000	1720	55	0	0.27	0	21.6333	1	1.0992	1.43667	1	0	0	0	1	1	0	1	FALSE	FALSE	FALSE	TRUE	FALSE	FALSE
72	97	63	34	100	100	100	0	17	44	1	43	60	94	21	73	45	0	0	0	2	67000	1830	30	0	0.4	0	20.0066	1	1.04693	2.66667	2	0	0	0	0	1	1	0	FALSE	FALSE	TRUE	FALSE	FALSE	FALSE
76	88	58	30	99	100	97	3	21	39	2	37	70	97	55	42	37	0	0	0	2	50000	1520	50	0	0.37	0	21.6413	1	1.00835	2.33333	2	0	0	0	0	1	0	0	FALSE	FALSE	TRUE	FALSE	FALSE	FALSE
69	88	48	40	99	100	98	2	16	38	2	36	70	95	58	37	60	0	0	0	2	64000	1550	27	1	0.5	0	26.6389	1	1.02176	5.44667	1	0	0	0	0	1	1	0	FALSE	FALSE	FALSE	TRUE	FALSE	FALSE
61	68	52	16	99	100	87	13	11	29	1	28	71	96	58	38	25	0	0	0	2	85000	1650	66	1	0.93	0	31.2213	1	0.991856	4.83	1	1	0	0	0	0	0	1	FALSE	TRUE	FALSE	FALSE	FALSE	FALSE
91	102	73	29	98	100	95	5	23	32	1	31	76	82	59	23	53	0	0	0	2	84000	1550	38	1	0.73	0	34.9636	1	0.993609	3.5	1	0	0	0	0	0	0	0	FALSE	FALSE	FALSE	FALSE	FALSE	FALSE
86	99	61	38	98	100	91	9	15	36	1	35	73	78	69	9	45	0	0	0.5	2	85000	1630	65	1	0.76	2	31.9922	1	0.292678	1.76333	3	0	0	1	0	0	0	0	TRUE	FALSE	FALSE	FALSE	FALSE	FALSE
90	116	74	42	99	100	99	1	18	45	2	43	84	91	78	13	45	25	0	0	2	74000	1700	43	1	1.24	3	25.6055	0	0.562215	3.20333	1	0	0	0	0	0	0	0	FALSE	FALSE	FALSE	FALSE	FALSE	FALSE
58	71	53	18	98	100	95	5	18	26	1	25	79	100	68	32	70	50	0	0	2	106000	1770	66	1	0.8	3	33.8345	0	0.53905	2.90333	2	1	0	0	0	0	0	1	FALSE	FALSE	FALSE	FALSE	FALSE	FALSE
81	95	70	25	99	100	97	3	11	22	1	21	70	94	48	46	60	0	0	0	2	103000	1820	57	0	0.65	0	31.0953	0	0.985303	3.18333	2	0	0	0	0	0	0	0	FALSE	FALSE	TRUE	FALSE	FALSE	FALSE
85	99	71	28	99	100	94	6	14	49	1	48	82	94	66	28	35	0	0	0	2	79000	1660	72	0	0.75	0	28.6689	0	1.02711	2.49667	3	1	0	0	1	0	1	0	TRUE	FALSE	FALSE	FALSE	FALSE	FALSE
70	88	57	31	99	100	98	2	14	30	1	29	79	91	64	27	35	0	0	0	2	78000	1630	54	0	0.28	0	29.3575	1	1.00545	1.55	1	1	0	0	0	0	1	0	FALSE	FALSE	FALSE	FALSE	FALSE	FALSE
63	70	57	13	100	100	100	0	14	37	1	36	57	60	55	5	40	0	0	0	2	64000	1700	64	0	0.33	0	22.1453	1	0.981998	2.75	1	0	0	0	0	0	0	0	FALSE	FALSE	TRUE	FALSE	FALSE	FALSE
80	104	66	38	100	100	100	0	1	2	1	1	69	107	59	48	70	0	0	0	2	61000	1660	34	0	1.07	0	22.1367	1	1.03783	2.60333	1	0	0	1	0	0	0	0	FALSE	FALSE	FALSE	FALSE	FALSE	TRUE
84	124	72	52	99	100	97	3	4	7	2	5	52	61	35	26	80	0	0	0	2	99000	1850	22	1	0.8	0	28.9262	0	1.10143	2.68667	2	0	0	0	0	0	1	0	FALSE	FALSE	TRUE	FALSE	TRUE	FALSE
82	108	68	40	100	100	100	0	4	7	2	5	50	60	42	18	30	0	0	0	2	30000	1400	24	0	0.53	0	15.3061	1	1.05544	1.23	1	0	0	0	0	0	0	0	FALSE	FALSE	TRUE	FALSE	FALSE	FALSE
84	100	76	24	99	100	99	1	11	29	1	28	75	93	51	42	30	0	0	0	2	67000	1770	55	0	0.47	0	21.3859	1	0.999026	1.90333	1	1	0	0	0	0	0	0	FALSE	FALSE	TRUE	FALSE	FALSE	FALSE
76	101	57	44	100	100	100	0	17	52	1	51	57	79	45	34	35	0	0	0	2	90000	1770	24	1	0.56	0	28.7274	1	1.01396	2.71333	2	0	0	0	0	0	0	0	FALSE	FALSE	TRUE	FALSE	FALSE	FALSE
62	68	57	11	99	100	96	4	25	38	3	35	80	90	73	17	15	0	0	0	2	56000	1600	65	0	0.57	0	21.875	1	0.979187	2.15333	2	1	0	0	0	0	0	0	FALSE	FALSE	FALSE	FALSE	FALSE	FALSE
80	103	71	32	99	100	99	1	35	50	2	48	101	114	88	26	40	0	0	0	2	74000	1620	58	1	0.88	0	28.1969	0	1.06306	1.9	1	1	0	1	0	0	0	0	FALSE	FALSE	FALSE	FALSE	FALSE	TRUE
85	106	71	35	99	100	89	11	23	38	1	37	65	105	55	50	60	0	0	0	2	72000	1670	70	1	1	0	25.8166	1	0.979497	2.48	2	1	0	1	0	1	0	0	FALSE	TRUE	TRUE	FALSE	FALSE	TRUE
70	86	48	38	98	100	97	3	12	32	2	30	84	89	78	11	25	0	0	0	2	80000	1580	61	0	0.32	0	32.0461	1	0.993543	1.45	NA	1	0	0	0	0	1	0	NA	FALSE	FALSE	TRUE	FALSE	FALSE
88	103	64	39	99	100	98	2	16	32	2	30	93	105	80	25	35	0	0	0	2	76000	1790	52	0	0.33	0	23.7196	0	1.02892	1.71333	2	0	0	1	1	0	1	0	FALSE	FALSE	FALSE	FALSE	FALSE	TRUE
73	85	56	29	99	100	96	4	14	38	2	36	94	104	89	15	30	0	0	0	2	63000	1730	65	0	0.35	0	21.0498	0	0.955175	1.54667	1	1	0	0	0	0	1	0	FALSE	FALSE	FALSE	FALSE	FALSE	FALSE
65	83	55	28	99	100	98	2	15	33	2	31	59	79	46	33	30	0	0	0	2	70000	1680	84	0	0.55	0	24.8016	0	0.975612	1.33	3	0	0	0	0	0	0	0	TRUE	FALSE	TRUE	FALSE	FALSE	FALSE
93	110	70	40	99	100	94	6	20	52	2	50	68	83	49	34	50	0	0	0	2	109000	1700	47	0	0.65	0	37.7163	1	1.00096	3.66667	2	0	0	0	0	1	1	0	FALSE	FALSE	TRUE	FALSE	FALSE	FALSE
91	116	85	31	100	100	100	0	18	30	4	26	76	112	62	50	55	0	0	0	2	84000	1800	68	1	0.83	0	25.9259	1	1.18701	2.68	3	0	1	1	0	0	0	1	TRUE	FALSE	FALSE	FALSE	FALSE	TRUE
93	100	83	17	99	100	96	4	12	21	2	19	78	103	71	32	60	0	0	0	2	62000	1850	59	0	0.58	0	18.1154	0	0.95074	2.06333	1	0	0	0	0	0	1	0	FALSE	FALSE	FALSE	FALSE	FALSE	FALSE
85	105	68	37	100	100	100	0	13	26	1	25	87	102	74	28	50	0	0	0	2	64000	1730	55	0	0.78	0	21.3839	1	0.999022	3.91333	1	0	0	0	0	NA	0	0	FALSE	FALSE	FALSE	FALSE	FALSE	FALSE
60	93	53	40	100	100	100	0	15	25	2	23	61	93	49	44	50	0	0	0	2	61000	1710	52	1	0.71	0	20.8611	1	0.992531	3.03	1	0	0	0	0	NA	0	0	FALSE	FALSE	TRUE	FALSE	FALSE	FALSE
68	80	57	23	98	100	95	5	16	24	2	22	80	102	69	33	50	0	0	0	2	97000	1780	53	1	0.97	0	30.6148	0	1.06787	2.77	1	1	0	0	0	0	0	0	FALSE	FALSE	FALSE	FALSE	FALSE	FALSE
72	92	66	26	100	100	100	0	14	40	2	38	63	71	58	13	50	0	0	0	2	55000	1670	62	0	0.58	0	19.721	1	0.955527	6.55	3	1	0	0	0	0	0	0	TRUE	FALSE	FALSE	FALSE	FALSE	FALSE
93	135	66	69	100	100	100	0	17	28	2	26	66	98	47	51	50	0	0	0	2	48000	1740	75	1	0.79	0	15.8541	1	0.946592	1.20333	2	1	1	0	0	1	0	0	FALSE	FALSE	TRUE	FALSE	TRUE	FALSE
71	90	62	28	95	99	82	17	16	50	2	48	54	85	36	49	50	0	0	0	2	100000	1680	82	0	0.83	0	35.4308	0	0.938862	2.5	NA	NA	NA	NA	NA	NA	0	0	NA	TRUE	TRUE	FALSE	FALSE	FALSE
52	77	46	31	100	100	100	0	16	35	2	33	53	84	44	40	50	0	0	0	2	65000	1750	80	1	0.92	0	21.2245	0	1.06111	1.53667	NA	NA	NA	NA	NA	NA	0	0	NA	FALSE	TRUE	TRUE	FALSE	FALSE
77	89	64	25	99	100	98	2	22	46	2	44	74	94	58	36	100	0	0	0	2	60000	1600	89	0	0.58	0	23.4375	1	0.933453	1.2	1	1	0	0	0	0	0	0	FALSE	FALSE	FALSE	FALSE	FALSE	FALSE
68	82	60	22	99	100	95	5	13	28	1	27	84	113	75	38	35	0	0	0	2	93000	1840	61	0	0.53	0	27.4693	0	0.965979	1.36667	3	0	0	0	0	0	1	0	TRUE	FALSE	FALSE	FALSE	FALSE	TRUE
82	96	76	20	98	100	97	3	24	41	2	39	74	111	54	57	50	0	0	0	2	60500	1610	68	1	0.67	0	23.3401	1	0.977345	1.9	2	1	0	0	0	0	1	0	FALSE	FALSE	TRUE	FALSE	FALSE	TRUE
74	79	68	11	99	100	99	1	13	18	1	17	63	71	60	11	35	0	0	0	2	61000	1710	70	0	0.82	0	20.8611	1	0.96638	3.6	2	0	0	0	0	0	1	1	FALSE	FALSE	FALSE	FALSE	FALSE	FALSE
73	84	70	14	99	100	77	23	15	24	2	22	69	101	56	45	70	0	0	0	2	58700	1540	67	0	0.9	0	24.7512	0	0.963161	2.43667	1	0	0	0	0	1	1	1	FALSE	TRUE	FALSE	FALSE	FALSE	FALSE
50	93	42	51	100	100	100	0	17	27	2	25	55	88	47	41	80	0	0	0	2	89000	1730	78	0	0.8	0	29.737	1	0.979462	1.84667	3	1	0	0	1	0	1	0	TRUE	FALSE	TRUE	TRUE	FALSE	FALSE
81	93	77	16	98	100	93	7	16	27	1	26	80	97	69	28	70	0	0	0	2	85000	1590	39	1	1.23	0	33.6221	1	1.31003	3.4	3	0	0	0	0	1	1	1	TRUE	FALSE	FALSE	FALSE	FALSE	FALSE
70	80	56	24	100	100	100	0	15	25	2	23	81	93	66	27	30	0	0	0	2	81000	1760	64	0	0.48	0	26.1493	1	0.986334	2.48333	2	0	0	1	0	0	0	0	FALSE	FALSE	FALSE	FALSE	FALSE	FALSE
77	124	68	56	98	100	96	4	12	33	2	31	65	88	58	30	50	0	0	0	2	96000	1650	70	1	0.46	0	35.2617	0	1.06675	4.29667	1	1	0	1	0	0	1	0	FALSE	FALSE	FALSE	FALSE	TRUE	FALSE
75	82	64	18	99	100	93	7	15	21	2	19	69	81	52	29	45	0	0	0	2	70000	1680	75	0	0.5	0	24.8016	1	0.958183	2.73667	1	1	0	0	0	1	1	0	FALSE	FALSE	TRUE	FALSE	FALSE	FALSE
86	93	81	12	100	100	100	0	11	17	2	15	55	70	39	31	50	0	0	0	2	112000	16980	60	1	0.5	0	0.388457	0	1.00497	1.33667	4	1	0	0	0	0	0	0	TRUE	FALSE	TRUE	FALSE	FALSE	FALSE
82	95	71	24	97	100	90	10	13	37	2	35	76	112	61	51	65	0	0	0	2	81000	1700	49	1	0.5	0	28.0277	1	1.0021	3.85	2	0	0	0	0	1	0	0	FALSE	TRUE	FALSE	FALSE	FALSE	TRUE
69	83	59	24	99	100	93	7	12	52	1	51	74	98	61	37	40	0	0	0	2	73000	1690	72	1	0.58	0	25.5593	1	1.16964	2.56333	3	1	1	0	0	0	1	0	TRUE	FALSE	FALSE	FALSE	FALSE	FALSE
77	111	66	45	98	100	95	5	17	24	1	23	47	57	42	15	50	0	0	0	2	86000	1710	60	0	0.75	0	29.4108	0	0.958267	5.14667	NA	NA	NA	NA	NA	NA	0	1	NA	FALSE	TRUE	FALSE	FALSE	FALSE
83	108	64	44	99	100	99	1	17	32	1	31	70	94	61	33	70	0	0	0	2	88000	1650	43	1	0.68	0	32.3232	1	1.30593	4.41333	3	1	0	0	0	1	0	0	TRUE	FALSE	FALSE	FALSE	FALSE	FALSE
109	121	93	28	99	100	91	9	26	54	2	52	72	99	55	44	65	0	0	0	2	65000	1750	59	0	1.35	0	21.2245	0	0.956537	3.70333	2	0	0	0	0	NA	0	1	FALSE	FALSE	TRUE	FALSE	TRUE	FALSE
69	88	61	27	99	100	96	4	28	40	1	39	64	108	56	52	43	0	0	0	2	83000	1750	72	0	0.46	0	27.102	0	0.970442	2.31333	2	1	0	0	0	0	0	0	FALSE	FALSE	FALSE	FALSE	FALSE	TRUE
102	128	68	60	100	100	100	0	18	32	2	30	71	80	58	22	45	0	0	0	2	61000	1770	48	0	0.5	0	19.4708	0	0.959164	3.03333	1	0	0	0	0	0	0	0	FALSE	FALSE	FALSE	FALSE	TRUE	FALSE
60	78	53	25	97	100	94	6	16	36	2	34	62	85	46	39	50	0	0	0	2	78000	1640	57	1	0.63	0	29.0006	1	1.00036	2.53	2	1	0	1	0	0	0	0	FALSE	FALSE	TRUE	FALSE	FALSE	FALSE
81	92	67	25	99	100	97	3	17	24	1	23	77	91	67	24	70	0	0	0	2	87000	1760	61	0	0.92	0	28.0863	0	0.973285	2.55333	2	0	0	0	0	0	1	0	FALSE	FALSE	FALSE	FALSE	FALSE	FALSE
74	94	65	29	100	100	100	0	15	51	2	49	54	64	48	16	70	0	0	0	2	65000	1700	27	0	0.5	0	22.4913	1	1.05135	2.58667	2	0	0	0	0	0	0	0	FALSE	FALSE	TRUE	FALSE	FALSE	FALSE
70	107	60	47	99	100	91	9	12	26	1	25	76	88	67	21	30	0	0	0	2	60000	1600	69	0	0.42	0	23.4375	0	0.95969	2.32	2	1	0	1	0	0	0	0	FALSE	FALSE	FALSE	FALSE	FALSE	FALSE
69	83	63	20	97	99	91	8	12	32	1	31	71	89	63	26	45	0	0	0	2	105000	1780	61	0	0.43	0	33.1398	0	0.979232	1.78	3	0	0	0	0	0	0	0	TRUE	FALSE	FALSE	FALSE	FALSE	FALSE
60	65	53	12	100	100	100	0	7	16	1	15	70	85	55	30	40	0	0	0	2	65000	1630	53	0	0.35	0	24.4646	1	1.00617	1.62	1	0	0	0	0	0	1	0	FALSE	FALSE	TRUE	FALSE	FALSE	FALSE
86	101	73	28	99	100	99	1	13	26	1	25	72	86	58	28	100	0	0	0	2	67000	1700	45	1	0.46	0	23.1834	1	1.00502	1.88	1	0	0	0	0	0	1	0	FALSE	FALSE	FALSE	FALSE	FALSE	FALSE
95	117	85	32	98	100	91	9	14	30	2	28	67	133	53	80	45	0	0	0	2	75000	1780	51	0	0.75	0	23.6713	0	0.948313	1.67	3	0	0	0	0	NA	1	1	TRUE	FALSE	TRUE	FALSE	FALSE	TRUE
69	83	47	36	99	100	98	2	14	47	2	45	81	108	68	40	40	0	0	0	2	85000	1650	56	0	0.48	0	31.2213	1	1.00354	1.53333	1	0	0	0	0	1	1	0	FALSE	FALSE	FALSE	TRUE	FALSE	TRUE
88	102	81	21	99	100	96	4	16	30	2	28	85	119	64	55	50	0	0	0	2	69000	1560	70	0	0.33	0	28.3531	1	0.97334	1.43333	1	1	0	1	0	0	1	0	FALSE	FALSE	FALSE	FALSE	FALSE	TRUE
66	81	56	25	99	100	94	6	11	19	1	18	72	81	64	17	40	0	0	0	2	80000	1720	75	0	0.68	0	27.0416	0	0.970765	2.46333	1	1	0	0	0	0	1	0	FALSE	FALSE	FALSE	FALSE	FALSE	FALSE
82	94	74	20	99	100	96	4	18	39	7	32	80	107	61	46	35	0	0	0	2	103000	1900	63	1	0.5	0	28.5319	0	1.11381	1.40333	NA	NA	NA	NA	NA	NA	0	0	NA	FALSE	FALSE	FALSE	FALSE	TRUE
77	92	65	27	99	100	90	10	13	35	1	34	85	100	75	25	35	0	0	0	2	75000	1690	54	1	0.55	0	26.2596	1	1.00126	2.87	2	0	0	0	0	0	1	0	FALSE	TRUE	FALSE	FALSE	FALSE	FALSE
63	88	55	33	100	100	100	0	13	29	1	28	74	93	65	28	50	0	0	0	2	71000	1740	61	1	0.72	0	23.4509	1	0.987103	2.6	1	1	0	1	0	0	0	0	FALSE	FALSE	FALSE	FALSE	FALSE	FALSE
64	75	55	20	99	100	93	7	14	41	2	39	74	86	69	17	48	0	0	0	2	69000	1500	68	1	0.63	0	30.6667	1	0.990053	3.35	1	1	0	0	0	0	0	0	FALSE	FALSE	FALSE	FALSE	FALSE	FALSE
89	110	67	43	99	100	90	10	13	35	1	34	70	87	52	35	100	0	0	0	2	68000	1710	65	0	0.93	0	23.255	1	0.980508	5.18	2	0	0	0	0	0	0	0	FALSE	TRUE	TRUE	FALSE	FALSE	FALSE
108	130	72	58	99	100	97	3	12	21	1	20	108	120	92	28	50	0	0	0	2	96000	1670	46	0	0.37	0	34.4222	0	1.00332	2.23333	1	1	0	1	0	1	0	0	FALSE	FALSE	FALSE	FALSE	TRUE	TRUE
67	76	63	13	95	97	94	3	15	40	1	39	78	93	70	23	50	0	0	0	2	57500	1570	60	1	0.38	0	23.3275	1	0.988002	1.49667	2	1	0	1	0	0	0	0	FALSE	FALSE	FALSE	FALSE	FALSE	FALSE
88	97	74	23	100	100	100	0	13	41	2	39	77	93	68	25	50	0	0	0	2	62000	1590	60	0	0.5	0	24.5243	1	0.995541	2.17	2	0	0	0	0	0	1	0	FALSE	FALSE	FALSE	FALSE	FALSE	FALSE
79	106	62	44	100	100	100	0	20	31	1	30	66	89	58	31	50	0	0	0	2	60000	1640	42	0	0.7	0	22.3081	1	1.02244	1.93667	1	0	0	0	0	0	1	0	FALSE	FALSE	FALSE	FALSE	FALSE	FALSE
79	87	71	16	99	100	80	20	14	39	5	34	75	91	68	23	50	0	0	0	2	54000	1560	72	1	0.42	0	22.1893	0	1.02791	1.78667	1	1	0	0	0	0	1	0	FALSE	TRUE	FALSE	FALSE	FALSE	FALSE
71	85	66	19	99	100	99	1	15	37	1	36	66	90	56	34	50	0	0	0	2	69000	1690	62	0	0.85	0	24.1588	0	0.962295	3.02	2	0	0	0	0	0	0	0	FALSE	FALSE	FALSE	FALSE	FALSE	FALSE
68	79	62	17	100	100	100	0	10	21	1	20	66	81	61	20	50	0	0	0	2	57000	1590	54	0	0.29	0	22.5466	1	1.00249	1.83667	1	0	0	0	0	0	0	0	FALSE	FALSE	FALSE	FALSE	FALSE	FALSE
86	98	73	25	99	100	98	2	21	31	2	29	80	95	65	30	50	0	0	0	2	89000	1590	79	0	0.36	0	35.2043	1	1.06198	2.01333	1	1	1	0	1	0	0	0	FALSE	FALSE	FALSE	FALSE	FALSE	FALSE
89	104	80	24	99	100	99	1	11	18	2	16	72	88	47	41	50	0	0	0	2	102000	1620	28	0	0.47	0	38.866	1	1.03604	2.73667	1	0	0	0	0	1	0	0	FALSE	FALSE	TRUE	FALSE	FALSE	FALSE
82	90	77	13	99	100	99	1	15	23	1	22	79	102	63	39	50	0	0	0	2	63000	1750	65	0	0.38	0	20.5714	0	0.954215	2.44667	1	1	0	0	0	1	1	1	FALSE	FALSE	FALSE	FALSE	FALSE	FALSE
102	118	71	47	99	100	93	7	26	57	1	56	84	112	60	52	100	0	0	0	2	61000	1740	55	0	0.97	0	20.148	0	0.948449	2.02	NA	NA	NA	NA	NA	NA	1	1	NA	FALSE	FALSE	FALSE	FALSE	TRUE
87	103	79	24	95	100	89	11	15	44	1	43	79	105	64	41	150	0	0	0	2	130000	1820	52	1	0.99	0	39.2465	0	0.989625	2.82	2	0	0	0	1	1	0	0	FALSE	TRUE	FALSE	FALSE	FALSE	TRUE
89	101	64	37	97	100	92	8	15	31	3	28	79	85	67	18	90	0	0	0	2	50000	1670	62	1	0.55	0	17.9282	0	1.03154	1.43333	2	0	0	0	0	1	1	0	FALSE	FALSE	FALSE	FALSE	FALSE	FALSE
68	78	55	23	99	100	93	7	16	27	2	25	75	97	33	64	60	0	0	0	2	70000	1670	69	0	0.53	0	25.0995	0	0.963771	3.58	1	0	0	0	0	1	1	1	FALSE	FALSE	TRUE	FALSE	FALSE	FALSE
67	91	58	33	99	100	98	2	14	29	1	28	64	76	48	28	55	0	0	0	2	55000	1660	71	0	0.6	0	19.9594	1	0.963014	4.12	1	0	0	0	0	0	1	0	FALSE	FALSE	TRUE	FALSE	FALSE	FALSE
75	101	67	34	99	100	99	1	17	31	1	30	80	95	71	24	50	0	0	0	2	67500	1850	40	1	0.46	0	19.7224	0	1.09453	4.69667	1	0	0	0	0	0	1	0	FALSE	FALSE	FALSE	FALSE	FALSE	FALSE
65	90	54	36	99	100	92	8	24	31	12	19	86	100	80	20	40	0	0	0	2	95000	1720	63	1	0.57	0	32.112	0	1.0672	1.73667	2	1	0	1	0	0	1	0	FALSE	FALSE	FALSE	FALSE	FALSE	FALSE
93	109	87	22	99	100	98	2	20	38	2	36	63	73	56	17	45	0	0	0	2	98000	1880	66	0	0.42	0	27.7275	0	0.971703	1.73667	2	1	0	0	0	0	0	1	FALSE	FALSE	FALSE	FALSE	FALSE	FALSE
68	100	52	48	100	100	100	0	16	59	2	57	65	80	54	26	50	0	0	0	2	70000	1650	20	1	0.4	0	25.7117	1	1.03197	2.61333	2	0	0	0	0	NA	0	0	FALSE	FALSE	TRUE	FALSE	FALSE	FALSE
72	91	66	25	99	100	97	3	15	26	2	24	67	78	57	21	15	0	0	0	2	82000	1840	35	0	0.21	0	24.2202	0	0.984684	1.24667	1	0	0	0	0	NA	0	0	FALSE	FALSE	FALSE	FALSE	FALSE	FALSE
73	88	60	28	99	100	99	1	23	29	8	21	92	105	76	29	65	0	0	0	2	110000	1800	31	1	0.48	0	33.9506	0	1.08346	2.3	1	1	0	0	0	0	0	0	FALSE	FALSE	FALSE	FALSE	FALSE	TRUE
73	89	45	44	99	100	93	7	11	33	1	32	70	82	59	23	30	0	0	0	2	85000	1840	65	0	0.56	0	25.1063	1	0.982447	3.43	1	1	0	0	0	0	1	0	FALSE	FALSE	FALSE	TRUE	FALSE	FALSE
82	90	72	18	99	100	98	2	13	39	1	38	87	96	79	17	40	0	0	0	2	84000	1770	57	1	0.52	0	26.8122	0	1.06234	2.8	1	1	0	0	0	0	1	0	FALSE	FALSE	FALSE	FALSE	FALSE	FALSE
71	90	54	36	91	99	86	13	9	26	1	25	95	129	84	45	45	0	0	0	2	77000	1690	57	1	0.51	0	26.9598	1	1.23514	2.43	4	0	0	0	0	1	1	0	TRUE	TRUE	FALSE	FALSE	FALSE	TRUE
85	113	68	45	99	100	97	3	9	31	1	30	70	83	62	21	30	0	0	0	2	71000	1680	81	0	0.35	0	25.1559	0	0.96109	1.90333	2	0	0	0	0	NA	1	0	FALSE	FALSE	FALSE	FALSE	FALSE	FALSE
66	85	54	31	100	100	100	0	17	27	1	26	80	105	64	41	50	0	0	0	2	64000	1720	41	0	0.36	0	21.6333	0	0.969745	2.96333	1	0	0	0	0	NA	1	1	FALSE	FALSE	FALSE	FALSE	FALSE	TRUE
82	99	60	39	99	100	95	5	15	27	1	26	92	109	78	31	100	0	0	0	2	100000	1900	40	0	0.55	0	27.7008	0	0.984163	2.91667	2	0	0	0	0	0	1	0	FALSE	FALSE	FALSE	FALSE	FALSE	TRUE
81	100	67	33	99	100	95	5	13	30	1	29	60	72	49	23	100	0	0	0	2	105000	1860	52	0	0.58	0	30.3503	0	0.983617	1.48	2	0	0	0	0	0	1	1	FALSE	FALSE	TRUE	FALSE	FALSE	FALSE
61	68	57	11	99	100	94	6	14	45	1	44	69	82	60	22	50	0	0	0	2	115000	1780	74	0	0.41	0	36.2959	0	1.02168	3.63	4	1	0	0	1	0	1	1	TRUE	FALSE	FALSE	FALSE	FALSE	FALSE
82	97	73	24	99	100	97	3	18	25	2	23	73	110	62	48	50	0	0	0	2	82000	1700	34	1	0.4	0	28.3737	1	1.35929	3.60333	3	1	0	0	0	0	1	0	TRUE	FALSE	FALSE	FALSE	FALSE	TRUE
99	115	84	31	98	100	94	6	16	38	1	37	79	111	67	44	70	0	0	0	2	75000	1630	64	1	0.86	0	28.2284	1	0.992191	2.76333	2	1	0	1	0	0	1	0	FALSE	FALSE	FALSE	FALSE	FALSE	TRUE
64	75	27	48	97	98	91	7	12	40	1	39	75	101	56	45	45	0	0	0	2	76000	1600	65	1	0.79	0	29.6875	1	1.20601	2.20333	4	0	1	0	0	1	1	0	TRUE	FALSE	FALSE	TRUE	FALSE	FALSE
80	89	73	16	99	100	97	3	28	48	1	47	82	110	66	44	100	0	0	0	2	90000	1880	49	0	0.85	0	25.464	0	0.969406	1.98333	2	0	0	0	0	1	0	1	FALSE	FALSE	FALSE	FALSE	FALSE	TRUE
99	113	86	27	100	100	100	0	17	29	1	28	84	91	75	16	50	0	0	0	2	117000	1630	45	0	0.4	0	44.0363	1	1.01626	2	1	1	0	0	0	0	0	0	FALSE	FALSE	FALSE	FALSE	FALSE	FALSE
65	100	55	45	99	100	99	1	14	44	1	43	67	82	59	23	50	0	0	0	2	63000	1500	51	1	0.58	0	28	1	1.00187	1.78	2	1	0	1	0	1	0	0	FALSE	FALSE	FALSE	FALSE	FALSE	FALSE
66	75	59	16	99	100	95	5	13	30	1	29	70	144	43	101	100	0	0	0	2	78000	1770	72	1	0.52	0	24.8971	0	1.03498	0.983333	1	0	1	0	0	0	0	0	FALSE	FALSE	TRUE	FALSE	FALSE	TRUE
62	71	53	18	100	100	100	0	19	39	2	37	87	100	72	28	50	0	0	0	2	110000	1690	56	0	0.31	0	38.5141	1	1.00946	2.23	3	0	0	0	0	0	1	1	TRUE	FALSE	FALSE	FALSE	FALSE	FALSE
72	90	49	41	100	100	100	0	12	20	1	19	97	109	87	22	10	0	0	0	2	95000	1800	56	0	0.6	0	29.321	1	1.00437	3.2	1	0	0	0	0	0	0	0	FALSE	FALSE	FALSE	TRUE	FALSE	TRUE
64	70	58	12	95	100	93	7	16	28	1	27	67	86	52	34	40	0	0	0	2	70000	1680	73	0	0.78	0	24.8016	1	0.96287	5.1	2	1	0	0	0	0	0	0	FALSE	FALSE	TRUE	FALSE	FALSE	FALSE
74	86	68	18	99	100	99	1	16	25	1	24	92	109	83	26	50	0	0	0	2	95000	1750	63	0	0.39	0	31.0204	0	1.02188	0.886667	3	1	1	0	1	0	0	0	TRUE	FALSE	FALSE	FALSE	FALSE	TRUE
78	96	69	27	99	100	99	1	12	22	1	21	89	99	79	20	50	0	0	0	2	88000	1620	57	1	0.97	0	33.5315	1	0.997465	3.98333	2	0	0	0	0	0	0	0	FALSE	FALSE	FALSE	FALSE	FALSE	FALSE
71	77	66	11	99	100	95	5	13	45	1	44	73	85	65	20	50	0	0	0	2	45000	1600	62	1	0.7	0	17.5781	1	0.969461	1.44667	1	0	0	1	0	0	0	0	FALSE	FALSE	FALSE	FALSE	FALSE	FALSE
57	67	49	18	99	100	97	3	15	33	2	31	79	83	77	6	50	0	0	0	2	90000	1750	50	0	0.51	0	29.3878	1	1.00793	3.03	1	1	0	0	0	0	0	0	FALSE	FALSE	FALSE	TRUE	FALSE	FALSE
89	103	79	24	99	100	99	1	12	37	1	36	78	118	63	55	70	0	0	0	2	107000	1950	57	0	0.85	0	28.1394	0	0.974411	2.96667	2	0	0	0	0	0	1	1	FALSE	FALSE	FALSE	FALSE	FALSE	TRUE
67	77	59	18	99	100	87	13	11	27	1	26	84	110	69	41	40	0	0	0	2	61000	1570	67	1	0.88	0	24.7475	1	0.981387	2.71333	1	1	0	0	0	0	1	0	FALSE	TRUE	FALSE	FALSE	FALSE	TRUE
73	82	67	15	96	100	73	27	15	34	1	33	76	83	70	13	55	0	0	0	2	98000	1800	76	0	0.91	0	30.2469	0	0.975906	2.39667	2	0	0	0	0	NA	1	0	FALSE	TRUE	FALSE	FALSE	FALSE	FALSE
107	138	94	44	100	100	100	0	18	30	1	29	89	101	73	28	60	0	0	0	2	72000	1630	27	0	0.44	0	27.0993	1	1.042	3.78667	1	0	0	0	0	0	0	0	FALSE	FALSE	FALSE	FALSE	TRUE	FALSE
72	87	61	26	100	100	100	0	21	32	1	31	71	77	67	10	60	0	0	0	2	93000	1850	31	0	0.31	0	27.1731	0	0.996608	3.26333	1	0	0	0	0	0	0	0	FALSE	FALSE	FALSE	FALSE	FALSE	FALSE
67	75	61	14	100	100	100	0	8	32	1	31	70	84	63	21	40	0	10	0	2	71000	1750	60	0	0.61	1	23.1837	1	0.850684	5.18	1	0	0	0	0	0	1	0	FALSE	FALSE	FALSE	FALSE	FALSE	FALSE
72	125	64	61	99	100	95	5	10	36	1	35	63	104	44	60	70	0	0	0	2	111000	1720	60	1	1.23	0	37.5203	0	1.06897	4.48	1	1	0	0	0	0	0	1	FALSE	FALSE	TRUE	FALSE	TRUE	FALSE
71	82	59	23	97	100	94	6	10	46	1	45	78	101	69	32	40	0	0	0	2	84000	1800	84	1	0.63	0	25.9259	0	1.00848	3.16667	1	1	0	0	0	0	1	0	FALSE	FALSE	FALSE	FALSE	FALSE	FALSE
70	86	66	20	98	100	98	2	15	23	1	22	79	104	62	42	90	0	0	0	2	78000	1650	71	1	0.62	0	28.6501	1	0.984299	0.9	1	1	0	0	0	0	0	0	FALSE	FALSE	FALSE	FALSE	FALSE	FALSE
74	103	63	40	99	100	99	1	9	44	3	41	82	95	69	26	40	0	0	0	2	52000	1630	49	0	0.43	0	19.5717	1	0.969451	1.16333	3	0	0	0	0	0	1	0	TRUE	FALSE	FALSE	FALSE	FALSE	FALSE
66	73	62	11	98	100	89	11	13	27	1	26	74	83	67	16	42	0	0	0	2	99000	1630	66	1	0.63	0	37.2615	1	0.990447	1.5	1	1	0	0	0	0	1	0	FALSE	TRUE	FALSE	FALSE	FALSE	FALSE
69	104	59	45	100	100	100	0	15	59	1	58	66	83	59	24	50	0	0	0	2	63000	1800	17	1	0.6	0	19.4444	0	1.10234	1.93	1	0	0	1	0	0	1	0	FALSE	FALSE	FALSE	FALSE	FALSE	FALSE
82	89	76	13	97	100	86	14	13	46	1	45	65	104	48	56	48	0	0	0	2	106000	1830	67	0	0.56	0	31.6522	0	0.98277	1.93	2	1	1	0	0	0	0	0	FALSE	TRUE	TRUE	FALSE	FALSE	FALSE
84	105	72	33	99	100	98	2	15	62	1	61	72	82	65	17	40	0	0	0	2	60000	1600	51	0	0.55	0	23.4375	1	1.00943	2.35	1	0	0	0	0	0	1	0	FALSE	FALSE	FALSE	FALSE	FALSE	FALSE
65	73	58	15	100	100	100	0	15	22	2	20	67	76	57	19	40	0	3	0	2	53000	1520	73	0	0.34	1	22.9398	1	1.0373	2.25333	1	0	0	0	0	0	0	1	FALSE	FALSE	FALSE	FALSE	FALSE	FALSE
61	79	58	21	100	100	100	0	12	15	1	14	62	81	48	33	40	0	3	0	2	104000	1690	78	0	0.37	1	36.4133	0	0.972713	1.45333	1	1	1	0	0	0	0	0	FALSE	FALSE	TRUE	FALSE	FALSE	FALSE
68	79	60	19	93	97	89	8	12	67	1	66	73	94	59	35	30	0	0	0	2	88000	1750	79	1	0.43	0	28.7347	1	0.973	1.83333	1	1	0	0	0	0	0	0	FALSE	TRUE	FALSE	FALSE	FALSE	FALSE
80	100	72	28	100	100	100	0	9	16	1	15	65	86	56	30	60	0	5	0	2	68000	1650	36	0	0.95	1	24.977	1	0.745496	2.95	2	0	0	0	0	1	0	0	FALSE	FALSE	FALSE	FALSE	FALSE	FALSE
79	104	63	41	100	100	100	0	14	20	2	18	77	89	71	18	45	0	0	0	2	45000	1580	38	0	0.35	0	18.026	0	0.971861	2.38	1	0	0	1	0	0	1	0	FALSE	FALSE	FALSE	FALSE	FALSE	FALSE
77	101	66	35	100	100	100	0	17	52	1	51	71	96	57	39	45	0	0	0	2	60000	1700	28	0	0.54	0	20.7612	1	1.05076	3.52	1	0	0	0	0	0	0	0	FALSE	FALSE	FALSE	FALSE	FALSE	FALSE
81	103	70	33	100	100	100	0	21	33	1	32	69	71	68	3	35	0	0	0	2	80000	1730	35	0	0.32	0	26.7299	0	0.988582	2.8	1	0	0	0	0	0	0	0	FALSE	FALSE	FALSE	FALSE	FALSE	FALSE
105	118	88	30	98	100	97	3	13	29	1	28	89	102	79	23	60	0	0	0	2	80000	1730	45	0	0.63	0	26.7299	0	0.975228	2.63	2	0	0	0	0	1	0	0	FALSE	FALSE	FALSE	FALSE	FALSE	FALSE
75	89	67	22	100	100	100	0	13	26	1	25	77	89	72	17	50	0	0	0	2	56000	1500	50	0	0.56	0	24.8889	0	0.967576	2.41333	1	0	0	0	0	0	0	0	FALSE	FALSE	FALSE	FALSE	FALSE	FALSE
57	89	49	40	99	100	98	2	24	29	6	23	59	98	47	51	72	0	0	0	2	84000	1840	66	1	1.35	0	24.811	0	1.04464	3.33333	2	1	0	1	0	1	0	1	FALSE	FALSE	TRUE	TRUE	FALSE	FALSE
56	74	46	28	99	100	97	3	18	22	3	19	77	127	52	75	50	0	0	0	2	75000	1680	76	0	0.55	0	26.5731	1	0.957679	1.93	2	0	0	0	0	0	1	1	FALSE	FALSE	TRUE	TRUE	FALSE	TRUE
81	93	74	19	100	100	100	0	21	31	1	30	89	116	75	41	50	0	0	0	2	70000	1620	88	0	0.78	0	26.6728	1	0.935525	1.09667	NA	NA	NA	NA	NA	NA	1	0	NA	FALSE	FALSE	FALSE	FALSE	TRUE
74	84	68	16	99	100	96	4	14	24	1	23	49	95	39	56	30	0	0	0	2	90000	1650	51	1	0.76	0	33.0579	1	1.26603	4.03	3	1	0	0	0	0	0	0	TRUE	FALSE	TRUE	FALSE	FALSE	FALSE
84	110	70	40	100	100	100	0	17	28	1	27	73	82	66	16	50	0	0	0	2	98000	1700	33	0	0.5	0	33.91	1	1.02464	2.87	1	1	0	0	0	0	0	0	FALSE	FALSE	FALSE	FALSE	FALSE	FALSE
93	107	75	32	99	100	98	2	14	38	1	37	58	131	36	95	50	0	0	0	2	68000	1590	58	1	0.68	0	26.8977	1	0.997258	2.88	2	0	0	0	0	0	0	0	FALSE	FALSE	TRUE	FALSE	FALSE	TRUE
86	108	66	42	98	100	95	5	19	39	2	37	89	148	64	84	100	0	0	0	2	105000	1800	80	0	0.62	0	32.4074	0	0.976818	2.53667	2	1	0	0	0	0	0	1	FALSE	FALSE	FALSE	FALSE	FALSE	TRUE
71	97	63	34	98	100	87	13	6	12	2	10	76	122	48	74	50	0	0	0	2	63000	1580	60	1	0.83	0	25.2363	1	0.992055	3.23333	2	1	0	0	0	0	0	0	FALSE	TRUE	TRUE	FALSE	FALSE	TRUE
70	85	62	23	100	100	100	0	2	10	1	9	68	77	64	13	50	0	0	0	2	63000	1620	43	0	0.55	0	24.0055	1	0.995169	2.36333	3	0	0	1	0	0	0	0	TRUE	FALSE	FALSE	FALSE	FALSE	FALSE
63	164	57	107	95	100	92	8	15	34	2	32	70	79	61	18	10	25	0	0	2	112000	1830	67	1	0.36	3	33.4438	0	0.546677	1.81333	1	1	0	0	0	0	0	0	FALSE	FALSE	FALSE	FALSE	TRUE	FALSE
70	85	64	21	100	100	100	0	15	21	2	19	74	100	55	45	50	0	0	0	2	83000	1800	43	1	0.62	0	25.6173	1	1.00585	1.93667	1	0	0	1	0	0	NA	NA	FALSE	FALSE	TRUE	FALSE	FALSE	FALSE
95	127	87	40	98	100	97	3	16	27	2	25	75	94	62	32	50	0	0	0	2	72000	1630	63	0	0.53	0	27.0993	1	0.990322	1.51667	1	1	0	0	0	0	1	0	FALSE	FALSE	FALSE	FALSE	TRUE	FALSE
68	75	59	16	99	100	97	3	17	22	3	19	71	77	67	10	50	0	0	0	2	83000	1800	69	0	0.4	0	25.6173	0	0.965087	1.7	2	1	0	0	0	0	0	0	FALSE	FALSE	FALSE	FALSE	FALSE	FALSE
70	102	61	41	99	100	95	5	17	27	2	25	71	92	58	34	50	0	0	0	2	51000	1630	49	0	0.75	0	19.1953	1	1.00601	2.40333	1	0	0	0	0	0	0	1	FALSE	FALSE	FALSE	FALSE	FALSE	FALSE
73	89	67	22	100	100	100	0	16	36	9	27	66	82	50	32	50	0	0	0	2	76000	1810	64	0	0.65	0	23.1983	0	0.95982	4.03	1	0	0	0	0	0	0	0	FALSE	FALSE	TRUE	FALSE	FALSE	FALSE
70	82	58	24	99	100	99	1	9	28	2	26	84	97	77	20	100	0	0	0	2	88000	1850	57	0	0.33	0	25.7122	0	0.967215	1.98	1	1	0	0	0	1	1	0	FALSE	FALSE	FALSE	FALSE	FALSE	FALSE
70	78	58	20	99	100	67	33	10	24	1	23	63	74	56	18	100	0	0	0	2	84000	1630	63	1	0.77	0	31.6158	1	0.994772	2.22	1	1	0	0	0	0	1	0	FALSE	TRUE	FALSE	FALSE	FALSE	FALSE
77	102	66	36	99	100	88	12	11	33	2	31	89	112	71	41	50	0	0	0	2	67000	1580	69	1	0.37	0	26.8386	1	0.983062	1.53667	2	1	0	0	0	0	1	0	FALSE	TRUE	FALSE	FALSE	FALSE	TRUE
51	60	45	15	100	100	100	0	13	93	2	91	68	100	56	44	100	0	0	0	2	89000	1790	50	1	0.85	0	27.7769	0	1.07619	1.45	2	1	0	0	0	0	1	0	FALSE	FALSE	FALSE	TRUE	FALSE	FALSE
75	100	64	36	100	100	100	0	13	25	1	24	81	94	69	25	25	0	0	0	2	81000	1800	56	0	0.68	0	25	1	1.00439	4.49667	NA	0	0	0	0	0	0	0	NA	FALSE	FALSE	FALSE	FALSE	FALSE
74	81	71	10	100	100	100	0	17	26	2	24	90	103	82	21	15	0	0	0	2	75000	1750	66	0	0.26	0	24.4898	1	0.960941	3.83	3	0	0	0	0	0	0	0	TRUE	FALSE	FALSE	FALSE	FALSE	FALSE
82	105	67	38	98	100	92	8	17	58	2	56	98	127	81	46	25	0	0	0	2	78000	1650	56	1	0.45	0	28.6501	1	1.00128	3.52	2	0	0	0	0	0	1	0	FALSE	FALSE	FALSE	FALSE	FALSE	TRUE
75	90	68	22	100	100	100	0	10	16	1	15	83	97	76	21	20	0	0	0	2	90000	1630	61	0	0.31	0	33.8741	0	0.990916	2.89667	NA	0	0	1	0	0	0	0	NA	FALSE	FALSE	FALSE	FALSE	FALSE
85	100	73	27	99	100	99	1	16	23	1	22	91	101	79	22	40	0	0	0	2	70000	1720	45	0	0.4	0	23.6614	1	1.0172	2.8	1	0	0	0	0	NA	0	0	FALSE	FALSE	FALSE	FALSE	FALSE	FALSE
72	84	65	19	100	100	100	0	13	21	5	16	73	94	63	31	50	0	0	0	2	68000	1750	64	0	0.65	0	22.2041	0	0.957696	2.38667	1	0	0	0	0	0	1	1	FALSE	FALSE	FALSE	FALSE	FALSE	FALSE
85	93	76	17	99	100	98	2	17	27	2	25	95	100	90	10	40	0	0	0	2	112000	1700	62	0	0.32	0	38.7543	0	1.00448	1.68667	1	0	0	0	0	0	0	0	FALSE	FALSE	FALSE	FALSE	FALSE	FALSE
80	92	65	27	100	100	100	0	18	24	9	15	71	86	60	26	30	0	0	0	2	131000	1600	64	0	0.32	0	51.1719	1	1.00622	1.8	1	1	0	0	0	0	0	0	FALSE	FALSE	FALSE	FALSE	FALSE	FALSE
57	71	52	19	100	100	100	0	16	38	1	37	68	90	57	33	40	0	0	0	2	62000	1700	39	1	0.44	0	21.4533	1	1.01533	1.50333	NA	0	0	0	0	0	0	0	NA	FALSE	FALSE	FALSE	FALSE	FALSE
68	107	55	52	100	100	100	0	18	27	1	26	70	84	44	40	40	0	0	0	2	65000	1750	30	1	0.48	0	21.2245	1	1.02856	2.83333	1	0	0	0	0	0	0	0	FALSE	FALSE	TRUE	FALSE	FALSE	FALSE
61	76	54	22	99	100	98	2	11	20	1	19	81	107	70	37	45	0	0	0	2	100000	1820	69	0	0.38	0	30.1896	0	0.979024	2.83	2	0	0	0	0	0	0	0	FALSE	FALSE	FALSE	FALSE	FALSE	TRUE
81	92	67	25	99	100	97	3	17	41	1	40	78	91	70	21	40	0	0	0	2	74000	1640	46	0	0.43	0	27.5134	1	0.997966	2.51333	3	0	0	0	0	1	0	0	TRUE	FALSE	FALSE	FALSE	FALSE	FALSE
73	81	67	14	99	100	98	2	9	21	1	20	85	94	81	13	50	0	5	0	2	84000	1670	55	0	0.47	1	30.1194	1	0.857519	4.67	1	0	0	0	0	0	0	0	FALSE	FALSE	FALSE	FALSE	FALSE	FALSE
78	103	67	36	99	100	99	1	13	23	1	22	69	120	45	75	100	0	0	0	2	121000	1780	62	0	0.81	0	38.1896	0	1.0136	4.21333	3	1	0	1	1	0	1	1	TRUE	FALSE	TRUE	FALSE	FALSE	TRUE
52	62	48	14	99	100	97	3	15	32	1	31	72	126	57	69	50	0	0	0	2	83000	1670	70	0	0.45	0	29.7608	0	0.977798	3.19667	2	1	0	0	0	0	1	1	FALSE	FALSE	FALSE	TRUE	FALSE	TRUE
73	78	67	11	99	100	97	3	16	25	1	24	86	106	74	32	50	0	0	0	2	45000	1610	62	0	0.62	0	17.3604	1	0.982604	3.98667	1	0	0	1	0	0	1	0	FALSE	FALSE	FALSE	FALSE	FALSE	TRUE
74	81	65	16	99	100	94	6	15	35	1	34	54	67	45	22	50	0	0	0	2	87000	1780	57	1	0.86	0	27.4587	0	1.0626	2.24667	2	1	1	0	0	0	1	1	FALSE	FALSE	TRUE	FALSE	FALSE	FALSE
75	89	68	21	98	100	94	6	17	22	1	21	109	163	66	97	50	0	0	0	2	105000	1640	60	0	0.38	0	39.0393	1	0.990235	3.78333	1	0	0	0	0	NA	0	1	FALSE	FALSE	FALSE	FALSE	FALSE	TRUE
76	90	69	21	98	100	92	8	10	17	1	16	65	98	45	53	100	0	5	0	2	82000	1890	49	1	0.53	1	22.9557	0	1.34278	2.13333	2	0	0	0	0	0	0	0	FALSE	FALSE	TRUE	FALSE	FALSE	FALSE
73	90	64	26	98	100	95	5	16	60	1	59	70	94	58	36	100	0	5	0	2	85000	1650	65	1	0.78	1	31.2213	1	1.60065	2.38	1	1	0	0	0	0	1	1	FALSE	FALSE	FALSE	FALSE	FALSE	FALSE
76	89	70	19	99	100	95	5	15	30	1	29	63	141	45	96	100	0	0	0	2	82000	1700	71	0	1.04	0	28.3737	1	0.970918	2.37	2	0	0	1	0	0	0	1	FALSE	FALSE	TRUE	FALSE	FALSE	TRUE
57	70	52	18	97	100	93	7	14	56	1	55	78	86	71	15	50	0	5	0	2	91000	1800	60	1	0.34	1	28.0864	0	0.699483	1.57	3	1	0	0	0	0	0	0	TRUE	FALSE	FALSE	FALSE	FALSE	FALSE
102	126	89	37	100	100	100	0	17	56	1	55	94	105	86	19	100	0	0	0	2	73000	1620	32	0	0.48	0	27.8159	1	1.03312	2.33	1	1	0	1	0	0	0	0	FALSE	FALSE	FALSE	FALSE	TRUE	TRUE
70	79	66	13	99	100	83	17	17	28	1	27	81	107	67	40	50	0	0	0	2	81000	1760	59	0	0.38	0	26.1493	0	0.968115	1.79667	2	1	0	1	0	0	0	0	FALSE	TRUE	FALSE	FALSE	FALSE	TRUE
78	110	72	38	100	100	100	0	14	23	1	22	93	114	80	34	50	0	0	0	2	65000	1660	60	1	0.51	0	23.5883	1	0.988879	1.36333	2	0	0	0	0	0	0	0	FALSE	FALSE	FALSE	FALSE	FALSE	TRUE
65	78	54	24	98	100	85	15	4	10	1	9	86	103	73	30	50	0	0	0	2	75000	1600	56	1	0.43	0	29.2969	1	1.00145	2.96333	2	1	0	1	0	0	0	0	FALSE	TRUE	FALSE	FALSE	FALSE	FALSE
82	100	69	31	100	100	100	0	1	2	1	1	76	83	74	9	50	0	0	0	2	88000	1720	27	0	0.34	0	29.7458	0	1.00356	2.38667	1	0	0	0	0	0	0	0	FALSE	FALSE	FALSE	FALSE	FALSE	FALSE
66	83	56	27	99	100	98	2	18	45	1	44	58	78	46	32	50	0	0	0	2	90000	1720	77	0	0.57	0	30.4218	0	0.975618	1.00333	1	1	0	0	0	0	0	1	FALSE	FALSE	TRUE	FALSE	FALSE	FALSE
51	73	43	30	99	100	98	2	15	30	1	29	68	87	52	35	50	0	0	0	2	93000	1820	62	0	0.43	0	28.0763	0	0.953396	0.68	NA	NA	NA	NA	NA	NA	0	0	NA	FALSE	TRUE	TRUE	FALSE	FALSE
66	73	57	16	99	100	95	5	9	17	1	16	80	111	67	44	100	0	0	0	2	101000	1760	64	0	0.66	0	32.6059	0	0.986309	1.39667	1	0	0	0	0	0	0	0	FALSE	FALSE	FALSE	FALSE	FALSE	TRUE
79	90	70	20	99	100	94	6	2	3	1	2	81	83	80	3	50	0	0	0	2	74000	1800	48	0	0.36	0	22.8395	0	0.964583	1.06333	1	0	0	1	0	0	0	0	FALSE	FALSE	FALSE	FALSE	FALSE	FALSE
71	92	56	36	99	100	99	1	26	43	1	42	71	109	51	58	40	0	0	0	2	46000	1530	46	0	0.53	0	19.6506	1	1.01265	2.51667	1	0	0	0	0	1	0	0	FALSE	FALSE	TRUE	FALSE	FALSE	TRUE
65	80	61	19	99	100	95	5	14	57	3	54	72	104	62	42	100	0	0	0	2	75000	1700	68	1	0.95	0	25.9516	1	0.982538	1.91333	1	0	0	0	0	1	1	1	FALSE	FALSE	FALSE	FALSE	FALSE	FALSE
84	108	69	39	99	100	99	1	16	31	2	29	114	168	78	90	100	0	0	0	2	90000	1650	27	1	0.65	0	33.0579	1	1.30846	4.34667	4	0	0	0	0	0	1	0	TRUE	FALSE	FALSE	FALSE	FALSE	TRUE
68	83	64	19	99	100	95	5	24	36	1	35	73	100	63	37	150	0	0	0	2	126000	1730	65	0	0.85	0	42.0996	0	1.00795	3.13333	3	1	0	0	1	0	0	1	TRUE	FALSE	FALSE	FALSE	FALSE	FALSE
61	73	58	15	100	100	100	0	15	40	1	39	89	118	73	45	50	0	0	0	2	75000	1730	61	0	0.45	0	25.0593	0	0.964793	2.32	2	0	0	0	0	0	0	1	FALSE	FALSE	FALSE	FALSE	FALSE	TRUE
62	80	60	20	99	100	99	1	12	46	1	45	85	94	77	17	50	0	0	0	2	87000	1750	83	0	0.56	0	28.4082	0	0.967408	3.11333	2	0	0	0	0	0	0	0	FALSE	FALSE	FALSE	FALSE	FALSE	FALSE
88	107	63	44	99	100	98	2	13	81	1	80	73	112	57	55	150	0	0	0	2	75000	1780	64	1	1.15	0	23.6713	0	1.04491	3.26333	NA	0	0	0	0	0	1	0	NA	FALSE	FALSE	FALSE	FALSE	TRUE
112	133	76	57	99	100	93	7	15	27	1	26	83	98	71	27	150	0	0	0	2	62000	1600	48	0	0.87	0	24.2188	1	1.01274	2.55333	1	1	0	0	0	0	1	0	FALSE	FALSE	FALSE	FALSE	TRUE	FALSE
69	82	54	28	100	100	100	0	13	33	1	32	81	90	67	23	50	0	0	0	2	95000	1760	59	0	0.38	0	30.6689	0	0.98325	1.76667	1	0	0	0	0	0	1	0	FALSE	FALSE	FALSE	FALSE	FALSE	FALSE
82	100	59	41	99	100	98	2	15	56	1	55	81	129	64	65	50	0	0	0	2	55000	1650	54	1	0.5	0	20.202	1	0.989092	1.26667	2	0	0	0	0	0	1	0	FALSE	FALSE	FALSE	FALSE	FALSE	TRUE
63	75	51	24	100	100	100	0	9	21	1	20	70	82	64	18	40	0	0	0	2	48000	1600	48	1	0.65	0	18.75	1	0.996262	1.63	2	0	0	0	0	1	0	0	FALSE	FALSE	FALSE	FALSE	FALSE	FALSE
79	97	68	29	99	100	98	2	13	29	2	27	60	71	50	21	40	0	0	0	2	62000	1640	68	1	1	0	23.0518	1	0.976825	5.83333	1	0	0	0	0	0	1	0	FALSE	FALSE	TRUE	FALSE	FALSE	FALSE
72	97	58	39	99	100	97	3	7	20	2	18	81	99	69	30	50	0	0	0	2	66000	1610	59	1	0.42	0	25.462	1	0.993615	2.03333	1	0	0	0	0	0	1	0	FALSE	FALSE	FALSE	FALSE	FALSE	FALSE
91	111	67	44	100	100	100	0	22	41	1	40	51	65	40	25	25	0	0	0	2	65000	1840	70	0	0.55	0	19.199	0	0.947519	2.35	2	1	0	0	0	1	0	0	FALSE	FALSE	TRUE	FALSE	FALSE	FALSE
89	111	74	37	99	100	98	2	14	60	1	59	90	143	72	71	80	0	0	0	2	105000	1680	68	1	0.4	0	37.2024	0	1.07353	1.53	2	0	0	0	0	0	1	0	FALSE	FALSE	FALSE	FALSE	FALSE	TRUE
85	95	70	25	99	100	96	4	15	21	2	19	93	104	84	20	90	0	0	0	2	58700	1540	53	0	1.05	0	24.7512	0	0.966028	2.27	2	0	0	0	0	0	1	0	FALSE	FALSE	FALSE	FALSE	FALSE	FALSE
72	91	53	38	99	100	98	2	12	48	2	46	68	82	55	27	35	0	0	0	2	60000	1550	53	1	0.57	0	24.974	1	1.11492	1.31667	NA	NA	NA	NA	NA	NA	1	0	NA	FALSE	TRUE	FALSE	FALSE	FALSE
77	88	62	26	99	100	98	2	17	35	2	33	94	119	72	47	20	0	0	0	2	89000	1790	75	1	0.44	0	27.7769	1	0.976767	1.45333	2	1	0	0	0	0	1	0	FALSE	FALSE	FALSE	FALSE	FALSE	TRUE
79	84	73	11	100	100	100	0	14	24	2	22	94	112	84	28	40	0	0	0	2	66000	1750	69	1	0.5	0	21.551	1	0.972748	1.53667	1	0	0	0	0	0	1	0	FALSE	FALSE	FALSE	FALSE	FALSE	TRUE
91	101	83	18	99	100	99	1	15	37	2	35	92	99	88	11	30	0	0	0	2	80000	1730	45	0	0.35	0	26.7299	0	0.975228	2.43667	2	0	0	0	0	1	0	0	FALSE	FALSE	FALSE	FALSE	FALSE	FALSE
76	102	64	38	99	100	96	4	15	29	1	28	79	111	68	43	33	0	0	0	2	76000	1700	44	0	0.53	0	26.2976	1	1.01774	3.1	1	0	0	0	0	1	0	0	FALSE	FALSE	FALSE	FALSE	FALSE	TRUE
83	109	76	33	99	100	99	1	14	34	1	33	68	73	60	13	40	0	0	0	2	71000	1780	52	0	0.36	0	22.4088	0	0.961203	2.23	2	0	0	0	0	0	1	0	FALSE	FALSE	FALSE	FALSE	FALSE	FALSE
68	88	61	27	99	100	99	1	12	16	1	15	88	94	84	10	19	0	0	0	2	99000	1830	66	0	0.27	0	29.5619	0	0.979134	1.95333	1	1	0	0	0	0	1	1	FALSE	FALSE	FALSE	FALSE	FALSE	FALSE
73	97	66	31	98	99	97	2	14	35	1	34	86	99	75	24	40	0	0	0	2	102000	1850	61	1	0.44	0	29.8028	0	1.17856	2.47	3	1	0	0	0	0	0	0	TRUE	FALSE	FALSE	FALSE	FALSE	FALSE
72	78	62	16	99	100	98	2	13	24	2	22	61	69	56	13	30	0	0	0	2	85000	1840	64	0	0.25	0	25.1063	0	0.964514	2.31333	2	0	0	0	0	0	1	0	FALSE	FALSE	FALSE	FALSE	FALSE	FALSE
66	73	61	12	100	100	100	0	14	25	3	22	95	112	83	29	27	0	0	0	2	59000	1650	60	0	0.53	0	21.6713	1	0.991666	2.06333	1	0	0	0	0	0	0	0	FALSE	FALSE	FALSE	FALSE	FALSE	TRUE
72	87	60	27	99	100	81	19	9	28	1	27	80	102	67	35	50	0	0	0.5	2	59000	1650	56	1	0.62	2	21.6713	0	0.290475	2.33667	2	1	0	0	0	0	1	0	FALSE	TRUE	FALSE	FALSE	FALSE	FALSE
81	89	72	17	100	100	99	1	11	32	1	31	74	108	58	50	50	0	0	0	2	84000	1780	72	0	0.72	0	26.5118	1	0.966649	1.86667	NA	1	0	0	0	0	1	0	NA	FALSE	FALSE	FALSE	FALSE	TRUE
92	100	81	19	99	100	89	11	26	40	8	32	91	111	75	36	48	0	0	0	2	60000	1770	65	1	0.49	0	19.1516	1	0.969706	1.02	2	1	1	0	0	0	1	0	FALSE	TRUE	FALSE	FALSE	FALSE	TRUE
70	85	60	25	100	100	100	0	24	45	7	38	68	91	56	35	50	0	0	0	2	51000	1730	19	1	1.17	0	17.0403	0	1.09792	4.15333	1	0	0	0	0	NA	0	0	FALSE	FALSE	FALSE	FALSE	FALSE	FALSE
80	118	29	89	100	100	100	0	13	40	1	39	76	132	56	76	60	0	0	0	2	47000	1650	30	1	0.95	0	17.2635	1	1.03333	3.29667	2	0	0	1	0	0	0	0	FALSE	FALSE	FALSE	TRUE	FALSE	TRUE
66	79	61	18	99	100	98	2	16	28	2	26	88	102	76	26	47	0	0	0	2	102000	1730	57	0	1.02	0	34.0807	0	0.994085	3.97	2	1	0	0	0	0	1	1	FALSE	FALSE	FALSE	FALSE	FALSE	FALSE
82	103	65	38	98	100	79	21	17	28	1	27	66	100	42	58	45	0	0	0	2	63200	1630	71	1	0.45	0	23.7871	1	0.974407	2.92	1	0	1	1	0	1	1	0	FALSE	TRUE	TRUE	FALSE	FALSE	FALSE
71	115	59	56	97	100	88	12	17	40	2	38	81	106	69	37	48	0	0	0	2	81000	1700	62	1	0.54	0	28.0277	0	1.11074	1.70333	NA	NA	NA	NA	NA	NA	0	1	NA	TRUE	FALSE	FALSE	FALSE	TRUE
92	105	77	28	98	100	93	7	15	43	2	41	109	128	93	35	50	0	0	0	2	81000	1780	66	0	0.34	0	25.565	0	0.965387	2.02	1	0	0	0	0	0	1	0	FALSE	FALSE	FALSE	FALSE	FALSE	TRUE
76	90	59	31	99	100	87	13	11	80	1	79	73	84	61	23	50	0	0	0	2	74000	1720	60	0	0.51	0	25.0135	1	0.996223	2.61333	1	1	0	0	0	0	1	0	FALSE	TRUE	FALSE	FALSE	FALSE	FALSE
57	64	54	10	99	100	97	3	12	29	2	27	76	94	63	31	100	0	0	0	2	102000	1760	64	0	0.35	0	32.9287	0	0.986996	2.13	1	0	0	1	0	0	1	0	FALSE	FALSE	FALSE	FALSE	FALSE	FALSE
68	76	57	19	100	100	100	0	13	40	1	39	83	177	65	112	50	0	0	0	2	57000	1670	67	0	0.82	0	20.4382	0	0.952729	2.30333	NA	0	0	0	0	0	1	0	NA	FALSE	FALSE	FALSE	FALSE	TRUE
63	81	55	26	99	100	97	3	16	40	2	38	73	92	64	28	50	0	0	0	2	54000	1650	69	0	0.65	0	19.8347	1	0.967887	1.48	1	1	0	1	0	1	0	0	FALSE	FALSE	FALSE	FALSE	FALSE	FALSE
78	92	69	23	100	100	100	0	19	31	2	29	76	86	68	18	50	0	0	0	2	72000	1630	45	0	0.72	0	27.0993	1	1.01588	3.83333	1	0	0	0	0	1	0	0	FALSE	FALSE	FALSE	FALSE	FALSE	FALSE
77	91	67	24	100	100	100	0	19	23	2	21	93	110	86	24	30	0	0	0	2	72000	1630	49	0	0.49	0	27.0993	1	1.00988	3.40333	1	1	0	0	0	1	0	0	FALSE	FALSE	FALSE	FALSE	FALSE	TRUE
77	91	53	38	100	100	100	0	18	29	1	28	71	96	65	31	44	0	0	0	2	87000	1800	53	0	0.45	0	26.8519	0	0.971391	2.82	1	0	0	0	0	0	0	0	FALSE	FALSE	FALSE	FALSE	FALSE	FALSE
75	97	53	44	100	100	99	1	14	31	1	30	75	104	36	68	175	0	0	0	2	85000	1650	69	0	1.24	0	31.2213	1	0.973568	2.58667	3	1	0	0	0	0	0	0	TRUE	FALSE	TRUE	FALSE	FALSE	FALSE
59	80	52	28	99	100	81	19	15	29	2	27	75	95	63	32	30	0	0	0	2	50000	1580	74	0	0.63	0	20.0288	1	0.956019	2.73333	2	0	0	0	0	0	0	0	FALSE	TRUE	FALSE	FALSE	FALSE	FALSE
64	93	47	46	99	100	98	2	13	32	2	30	83	105	72	33	40	0	0	0	2	70000	1760	60	0	0.48	0	22.5981	0	0.959201	2.06333	1	0	1	0	0	0	0	0	FALSE	FALSE	FALSE	TRUE	FALSE	TRUE
67	89	61	28	100	100	100	0	20	37	2	35	45	76	25	51	30	0	0	0	2	79000	1540	67	0	0.45	0	33.3108	1	0.983104	3.07	4	1	0	0	0	0	0	0	TRUE	FALSE	TRUE	FALSE	FALSE	FALSE
78	128	64	64	100	100	100	0	17	30	1	29	83	114	71	43	45	0	0	0	2	55000	1690	49	1	0.64	0	19.257	1	0.995416	2.37	1	0	0	0	0	0	0	0	FALSE	FALSE	FALSE	FALSE	TRUE	TRUE
85	103	71	32	100	100	100	0	13	27	1	26	90	115	70	45	100	0	0	0	2	73000	1710	55	0	0.58	0	24.9649	0	0.954938	2.14667	4	1	0	0	0	0	1	0	TRUE	FALSE	FALSE	FALSE	FALSE	TRUE
69	86	58	28	99	100	95	5	15	41	1	40	63	72	56	16	100	0	0	0	2	73000	1630	63	0	0.4	0	27.4756	1	0.990829	3.15	2	0	0	0	0	0	0	0	FALSE	FALSE	FALSE	FALSE	FALSE	FALSE
71	96	66	30	100	100	100	0	19	28	1	27	70	89	58	31	50	0	0	0	2	60000	1550	80	0	0.48	0	24.974	1	0.946777	3	2	1	0	0	0	0	0	0	FALSE	FALSE	FALSE	FALSE	FALSE	FALSE
86	102	65	37	100	100	100	0	17	39	1	38	71	79	63	16	50	0	0	0	2	66000	1530	80	0	0.5	0	28.1943	1	0.956822	2.08	2	0	0	0	0	0	0	0	FALSE	FALSE	FALSE	FALSE	FALSE	FALSE
76	90	59	31	99	100	98	2	11	40	1	39	60	75	47	28	80	0	0	0	2	70000	1790	62	1	1.14	0	21.847	0	1.04301	2.25333	1	0	0	1	0	0	0	0	FALSE	FALSE	TRUE	FALSE	FALSE	FALSE
66	94	60	34	100	100	100	0	19	27	1	26	79	99	69	30	50	0	0	0	2	60000	1690	32	0	0.39	0	21.0077	1	1.04233	1.25333	1	0	0	0	0	0	1	0	FALSE	FALSE	FALSE	FALSE	FALSE	FALSE
80	82	77	5	100	100	100	0	16	25	1	24	72	76	71	5	100	0	0	0	2	78000	1800	50	0	0.55	0	24.0741	0	0.965666	3.01667	2	0	0	0	0	0	1	0	FALSE	FALSE	FALSE	FALSE	FALSE	FALSE
60	72	48	24	100	100	100	0	13	23	1	22	70	76	61	15	50	0	0	0	2	52000	1660	50	0	0.88	0	18.8707	1	1.00359	4.95	1	0	0	0	0	0	1	0	FALSE	FALSE	FALSE	TRUE	FALSE	FALSE
83	120	67	53	99	100	98	2	15	47	2	45	75	101	63	38	50	0	0	0	2	60000	1690	44	1	0.46	0	21.0077	0	1.09098	1.68	1	0	0	0	0	0	1	0	FALSE	FALSE	FALSE	FALSE	TRUE	FALSE
92	104	79	25	98	100	88	12	16	29	2	27	75	97	65	32	80	0	0	0	2	90000	1750	49	1	0.82	0	29.3878	0	1.07527	2.11667	1	0	0	0	0	0	1	1	FALSE	TRUE	FALSE	FALSE	FALSE	FALSE
73	87	67	20	98	100	88	12	13	46	2	44	55	82	44	38	60	0	0	0	2	72000	1540	76	1	0.58	0	30.3593	1	0.980177	1.71333	1	1	0	0	0	0	1	0	FALSE	TRUE	TRUE	FALSE	FALSE	FALSE
67	90	44	46	99	100	94	6	15	42	2	40	78	85	70	15	60	0	0	0	2	90000	1680	75	0	0.66	0	31.8878	0	0.979256	1.98	NA	0	0	0	0	NA	1	0	NA	FALSE	FALSE	TRUE	FALSE	FALSE
77	96	62	34	100	100	100	0	15	27	1	26	55	102	36	66	80	0	0	0	2	65000	1700	36	0	0.25	0	22.4913	1	1.0337	-0.05	1	0	0	0	0	0	1	0	FALSE	FALSE	TRUE	FALSE	FALSE	FALSE
76	86	70	16	100	100	100	0	18	30	2	28	89	99	79	20	30	0	10	0	2	73000	1630	51	0	0.3	1	27.4756	1	0.83456	1.63	2	1	0	0	0	1	1	0	FALSE	FALSE	FALSE	FALSE	FALSE	FALSE
88	105	76	29	99	100	84	16	14	28	1	27	78	92	68	24	30	0	0	0	2	69000	1590	52	0	0.47	0	27.2932	1	1.00604	2.21667	1	0	0	0	0	0	1	0	FALSE	TRUE	FALSE	FALSE	FALSE	FALSE
74	92	59	33	99	100	97	3	9	24	1	23	86	95	74	21	50	0	0	0	2	76000	1780	55	0	0.43	0	23.9869	0	0.963554	1.93333	1	0	0	0	0	0	1	0	FALSE	FALSE	FALSE	FALSE	FALSE	FALSE
68	78	62	16	99	100	98	2	22	52	1	51	101	113	93	20	100	0	0	0	2	86000	1730	48	1	0.55	0	28.7347	0	0.973055	1.93667	1	1	0	0	1	0	1	0	FALSE	FALSE	FALSE	FALSE	FALSE	TRUE
68	81	59	22	99	100	92	8	14	25	1	24	72	85	63	22	100	0	0	0	2	76000	1680	83	1	0.47	0	26.9274	0	1.01301	2.25333	2	0	0	0	0	0	0	0	FALSE	FALSE	FALSE	FALSE	FALSE	FALSE
93	107	79	28	98	100	92	8	10	22	1	21	93	109	83	26	100	0	0	0	2	86000	1710	49	0	0.52	0	29.4108	0	0.981512	1.75333	2	0	0	1	0	0	1	0	FALSE	FALSE	FALSE	FALSE	FALSE	TRUE
71	90	63	27	97	100	95	5	15	35	1	34	67	84	51	33	50	0	0	0	2	83000	1660	55	0	0.39	0	30.1205	1	1.00474	1.60333	2	0	0	0	0	1	1	0	FALSE	FALSE	TRUE	FALSE	FALSE	FALSE
80	105	64	41	95	100	75	25	15	33	1	32	66	87	50	37	100	0	0	0	2	78000	1500	82	0	0.68	0	34.6667	1	0.960541	1.16667	NA	NA	NA	NA	NA	NA	1	0	NA	TRUE	TRUE	FALSE	FALSE	FALSE
97	111	57	54	98	100	97	3	17	41	1	40	97	113	84	29	150	0	0	0	2	81000	1750	61	0	0.85	0	26.449	0	0.968639	1.26333	NA	0	0	0	0	1	0	0	NA	FALSE	FALSE	FALSE	FALSE	TRUE
83	92	72	20	97	100	81	19	13	31	1	30	82	97	71	26	40	0	0	0	2	59000	1650	56	1	0.54	0	21.6713	1	1.22456	1.67	3	0	0	0	0	NA	1	0	TRUE	TRUE	FALSE	FALSE	FALSE	FALSE
82	96	73	23	97	100	94	6	13	30	1	29	86	103	73	30	40	0	0	0	2	89000	1790	49	0	0.35	0	27.7769	0	0.975929	1.33	1	0	0	0	0	0	1	0	FALSE	FALSE	FALSE	FALSE	FALSE	FALSE
57	67	50	17	100	100	100	0	9	23	1	22	64	83	50	33	40	0	5	0	2	70000	1560	38	0	0.48	1	28.764	1	0.824886	4.23	2	0	0	0	0	1	0	0	FALSE	FALSE	TRUE	TRUE	FALSE	FALSE
70	86	57	29	100	100	99	1	11	32	1	31	76	111	64	47	60	0	3	0	2	50000	1600	55	0	0.96	1	19.5312	1	0.835796	3.21333	NA	1	0	0	0	0	0	0	NA	FALSE	FALSE	FALSE	FALSE	TRUE
61	73	55	18	99	100	93	7	15	28	2	26	66	100	55	45	20	0	0	0	2	55000	1700	70	1	1.08	0	19.0311	0	1.0194	2.38333	2	1	0	0	0	0	1	0	FALSE	FALSE	TRUE	FALSE	FALSE	FALSE
69	86	62	24	99	100	91	9	9	23	1	22	81	106	68	38	10	0	0	0	2	70000	1600	77	0	0.82	0	27.3438	1	0.949723	2.82	3	1	0	0	0	0	1	0	TRUE	FALSE	FALSE	FALSE	FALSE	TRUE
72	97	61	36	99	100	98	2	12	36	1	35	75	101	61	40	40	0	5	0	2	76000	1750	45	0	0.3	1	24.8163	0	1.1361	2.48333	1	1	0	0	0	0	0	0	FALSE	FALSE	FALSE	FALSE	FALSE	FALSE
80	90	67	23	100	100	100	0	26	38	1	37	61	77	48	29	50	0	3	0	2	76000	1700	59	0	0.59	1	26.2976	0	1.10035	2.15333	2	0	0	0	0	NA	1	1	FALSE	FALSE	TRUE	FALSE	FALSE	FALSE
68	80	61	19	97	100	93	7	20	40	1	39	74	87	58	29	50	0	0	0	2	83000	1610	76	0	0.46	0	32.0204	1	0.972164	2.98	2	1	0	0	0	0	0	0	FALSE	FALSE	FALSE	FALSE	FALSE	FALSE
88	101	79	22	99	100	94	6	16	28	1	27	77	86	70	16	50	0	0	0	2	67000	1580	52	0	0.4	0	26.8386	1	0.989075	3.61333	4	0	0	0	0	0	0	0	TRUE	FALSE	FALSE	FALSE	FALSE	FALSE
94	108	76	32	97	100	95	5	16	30	1	29	49	68	38	30	50	0	0	0	2	67000	1580	65	1	0.85	0	26.8386	1	0.988752	4.01667	1	0	0	0	0	1	1	1	FALSE	FALSE	TRUE	FALSE	FALSE	FALSE
76	97	71	26	100	100	100	0	16	38	1	37	68	103	54	49	50	0	0	0	2	75000	1800	75	0	0.55	0	23.1481	0	0.955151	3.13	1	0	0	0	0	0	0	0	FALSE	FALSE	TRUE	FALSE	FALSE	FALSE
91	102	84	18	100	100	100	0	16	26	1	25	70	88	61	27	20	0	0	0	2	80000	1700	81	0	1.14	0	27.6817	0	0.984362	2.33667	3	0	0	0	0	0	1	0	TRUE	FALSE	FALSE	FALSE	FALSE	FALSE
68	88	59	29	99	100	98	2	19	32	1	31	105	137	82	55	50	20	0	0	2	76000	1730	76	0	0.53	3	25.3934	1	1.39324	1.49667	2	1	0	0	0	0	0	0	FALSE	FALSE	FALSE	FALSE	FALSE	TRUE
74	86	60	26	99	100	96	4	12	28	1	27	74	88	63	25	50	0	0	0	2	79000	1820	79	0	0.85	0	23.8498	0	0.956352	2.6	2	1	0	0	0	0	1	0	FALSE	FALSE	FALSE	FALSE	FALSE	FALSE
71	86	67	19	99	100	95	5	9	21	1	20	73	95	58	37	50	0	0	0	2	49000	1670	69	1	0.44	0	17.5697	0	1.0152	3.07	NA	0	1	1	0	0	1	0	NA	FALSE	FALSE	FALSE	FALSE	FALSE
86	109	80	29	100	100	100	0	11	19	2	17	73	81	66	15	20	0	0	0	2	90000	1620	50	0	0.36	0	34.2936	1	1.00088	1.63	1	1	0	1	0	0	1	0	FALSE	FALSE	FALSE	FALSE	FALSE	FALSE
85	111	73	38	98	100	90	10	15	39	2	37	70	94	57	37	10	0	0	0	2	70000	1670	78	1	0.48	0	25.0995	1	0.967491	3.36667	2	1	0	0	0	0	0	0	FALSE	TRUE	FALSE	FALSE	FALSE	FALSE
70	79	65	14	100	100	100	0	8	14	1	13	82	100	74	26	30	0	0	0	2	97000	1680	62	0	0.26	0	34.3679	0	0.983471	2.54667	4	1	0	0	0	0	1	0	TRUE	FALSE	FALSE	FALSE	FALSE	FALSE
101	112	94	18	100	100	100	0	9	20	1	19	86	99	78	21	50	0	0	0	2	85000	1750	63	0	0.31	0	27.7551	0	0.971886	2.23	2	0	0	1	0	0	1	0	FALSE	FALSE	FALSE	FALSE	FALSE	FALSE
76	92	66	26	100	100	100	0	16	25	1	24	82	95	76	19	50	0	0	0	2	85000	1700	25	0	0.34	0	29.4118	1	1.03923	1.88667	3	0	0	0	0	0	1	0	TRUE	FALSE	FALSE	FALSE	FALSE	FALSE
90	100	84	16	99	100	93	7	13	22	1	21	84	91	78	13	50	0	0	0	2	68000	1690	82	1	0.35	0	23.8087	0	1.00916	1.43667	1	0	0	1	0	0	1	0	FALSE	FALSE	FALSE	FALSE	FALSE	FALSE
62	65	60	5	100	100	100	0	14	22	4	18	87	119	73	46	10	0	0	0	2	93000	1780	70	0	0.17	0	29.3524	0	0.977554	4.3	2	0	0	0	0	0	NA	NA	FALSE	FALSE	FALSE	FALSE	FALSE	TRUE
72	98	62	36	100	100	100	0	13	36	1	35	83	104	72	32	50	0	0	0	2	75000	1750	59	0	0.75	0	24.4898	1	0.997818	5.8	2	0	0	0	0	0	0	0	FALSE	FALSE	FALSE	FALSE	FALSE	FALSE
92	102	76	26	100	100	100	0	15	21	1	20	65	73	61	12	50	0	0	0	2	76000	1690	55	0	0.77	0	26.6097	0	0.970197	4.98667	2	0	0	0	0	0	0	0	FALSE	FALSE	FALSE	FALSE	FALSE	FALSE
66	79	53	26	100	100	100	0	25	40	1	39	65	77	59	18	45	0	0	0	2	74000	1850	38	1	0.6	0	21.6216	0	1.09955	2.12	1	0	0	0	0	1	0	0	FALSE	FALSE	FALSE	FALSE	FALSE	FALSE
68	84	62	22	100	100	100	0	17	31	2	29	57	69	49	20	30	0	0	0	2	53000	1630	73	0	0.37	0	19.9481	1	0.958247	2.3	1	1	0	0	0	0	0	0	FALSE	FALSE	TRUE	FALSE	FALSE	FALSE
79	99	69	30	99	100	99	1	14	33	4	29	70	76	61	15	10	0	0	0	2	84000	1730	28	1	0.53	0	28.0664	1	1.36147	2.25	3	0	0	0	0	1	1	0	TRUE	FALSE	FALSE	FALSE	FALSE	FALSE
64	92	47	45	99	100	98	2	19	26	2	24	63	80	55	25	10	0	0	0	2	98000	1700	50	0	0.63	0	33.91	1	1.00133	2.68333	1	0	0	0	0	1	1	1	FALSE	FALSE	TRUE	TRUE	FALSE	FALSE
98	124	83	41	100	100	100	0	20	53	2	51	94	119	81	38	45	0	0	0	2	57000	1750	56	0	1.02	0	18.6122	1	0.992835	3.83333	1	0	0	0	0	0	0	0	FALSE	FALSE	FALSE	FALSE	TRUE	TRUE
78	97	69	28	100	100	100	0	13	24	1	23	67	76	63	13	30	0	0	0	2	98000	1570	69	0	0.42	0	39.7582	1	0.987211	2.40333	1	1	0	0	0	0	0	0	FALSE	FALSE	FALSE	FALSE	FALSE	FALSE
81	98	72	26	100	100	100	0	14	26	1	25	102	120	81	39	20	0	0	0	2	74000	1710	55	0	0.22	0	25.3069	0	0.955874	1.78667	3	1	0	1	0	NA	0	0	TRUE	FALSE	FALSE	FALSE	FALSE	TRUE
78	96	72	24	96	99	90	9	12	26	1	25	69	77	53	24	25	0	0	0	2	75000	1630	73	1	0.33	0	28.2284	1	0.980449	1.43333	2	1	0	0	0	1	1	1	FALSE	TRUE	TRUE	FALSE	FALSE	FALSE
59	76	51	25	99	100	94	6	20	26	1	25	71	112	61	51	35	0	0	0	2	74000	1680	68	1	0.53	0	26.2188	0	1.04522	1.13	2	1	1	0	0	0	0	1	FALSE	FALSE	FALSE	FALSE	FALSE	TRUE
75	100	65	35	99	100	98	2	14	44	1	43	99	137	85	52	40	0	0	0	2	55000	1590	81	0	0.53	0	21.7555	1	0.941173	1.14667	2	1	0	0	0	0	0	0	FALSE	FALSE	FALSE	FALSE	FALSE	TRUE
103	120	82	38	99	100	97	3	12	24	2	22	58	71	48	23	50	0	0	0	2	62000	1590	25	0	0.52	0	24.5243	0	1.00285	2.95	1	0	0	0	0	0	0	0	FALSE	FALSE	TRUE	FALSE	TRUE	FALSE
63	81	58	23	99	100	98	2	16	29	1	28	69	91	57	34	40	0	0	0	2	78000	1830	52	1	0.53	0	23.2912	0	1.07376	2.71667	2	1	0	0	0	0	0	0	FALSE	FALSE	FALSE	FALSE	FALSE	FALSE
81	99	71	28	99	100	97	3	26	53	2	51	66	76	53	23	42	0	0	0	2	55000	1600	42	0	0.6	0	21.4844	1	1.02315	2.20333	1	0	0	1	0	1	0	0	FALSE	FALSE	TRUE	FALSE	FALSE	FALSE
76	85	59	26	100	100	100	0	18	44	10	34	60	108	51	57	55	0	0	0	2	72000	1630	28	0	0.73	0	27.0993	1	1.04038	1.93333	1	0	0	0	0	1	1	0	FALSE	FALSE	TRUE	FALSE	FALSE	TRUE
91	109	79	30	99	100	99	1	21	35	7	28	82	101	69	32	40	0	0	0	2	57000	1640	26	0	0.43	0	21.1927	1	1.05487	2.18333	1	0	0	0	0	0	0	0	FALSE	FALSE	FALSE	FALSE	FALSE	FALSE
72	91	64	27	99	100	99	1	12	20	1	19	75	112	63	49	50	0	0	0	2	113000	1670	65	0	0.51	0	40.5178	1	0.991571	1.86333	2	1	0	0	0	0	1	0	FALSE	FALSE	FALSE	FALSE	FALSE	TRUE
76	90	63	27	100	100	100	0	14	26	1	25	66	70	61	9	50	0	0	0	2	80000	1780	56	0	0.38	0	25.2493	0	0.966147	2.53	2	0	0	0	0	NA	1	0	FALSE	FALSE	FALSE	FALSE	FALSE	FALSE
80	105	70	35	99	100	99	1	12	21	1	20	87	101	79	22	50	0	0	0	2	86000	1800	46	0	0.42	0	26.5432	0	0.95021	2.05	3	1	0	0	0	0	1	0	TRUE	FALSE	FALSE	FALSE	FALSE	FALSE
68	78	56	22	100	100	100	0	12	17	1	16	74	83	63	20	50	0	0	0	2	81000	1640	57	0	0.27	0	30.116	1	1.0096	1.51667	3	0	0	0	1	0	1	0	TRUE	FALSE	FALSE	FALSE	FALSE	FALSE
87	113	70	43	99	100	97	3	11	25	1	24	73	85	61	24	50	0	0	0	2	63000	1550	47	1	0.43	0	26.2227	1	1.29023	1.53333	3	0	0	0	0	0	1	0	TRUE	FALSE	FALSE	FALSE	FALSE	FALSE
64	70	57	13	99	100	95	5	10	24	2	22	70	80	64	16	50	0	0	0	2	64000	1850	59	0	0.4	0	18.6998	0	0.951788	1.03	NA	0	0	0	0	NA	1	0	NA	FALSE	FALSE	FALSE	FALSE	FALSE
76	96	39	57	100	100	100	0	15	45	2	43	59	72	51	21	100	0	0	0	2	66000	1680	58	1	0.91	0	23.3844	1	0.990618	4.13	1	1	0	0	0	0	0	1	FALSE	FALSE	TRUE	TRUE	FALSE	FALSE
71	88	66	22	100	100	100	0	26	45	2	43	45	64	35	29	100	0	0	0	2	68000	1700	61	0	0.99	0	23.5294	0	0.961066	3.53667	2	1	0	0	0	0	0	1	FALSE	FALSE	TRUE	FALSE	FALSE	FALSE
60	61	60	1	100	100	100	0	21	38	6	32	70	89	58	31	50	0	0	0	2	90000	1720	84	0	0.84	0	30.4218	0	0.928982	2.20333	NA	NA	NA	NA	NA	NA	0	0	NA	FALSE	FALSE	FALSE	FALSE	FALSE
78	95	71	24	99	100	93	7	16	22	5	17	88	101	80	21	50	0	0	0	2	89000	1730	52	0	0.59	0	29.737	1	1.00643	2.40333	2	0	0	0	0	0	0	0	FALSE	FALSE	FALSE	FALSE	FALSE	FALSE
76	85	67	18	99	100	94	6	16	32	1	31	61	64	54	10	30	0	0	0	2	50000	1680	62	0	0.45	0	17.7154	1	0.941415	1.2	NA	NA	NA	NA	NA	NA	0	0	NA	FALSE	TRUE	FALSE	FALSE	FALSE
86	105	81	24	100	100	100	0	17	25	5	20	75	89	64	25	30	0	0	0	2	88000	1650	68	0	0.34	0	32.3232	1	0.981132	1.13667	2	0	0	0	0	NA	0	0	FALSE	FALSE	FALSE	FALSE	FALSE	FALSE
82	101	67	34	100	100	99	1	12	26	1	25	58	70	52	18	40	0	0	0	2	92000	1910	49	0	0.98	0	25.2186	1	1.01072	1.46333	1	0	0	0	0	NA	0	0	FALSE	FALSE	TRUE	FALSE	FALSE	FALSE
72	82	66	16	94	95	94	1	14	29	1	28	84	103	74	29	45	0	0	0	2	87000	1800	55	0	0.47	0	26.8519	0	0.970919	2.68667	2	1	0	0	0	0	0	0	FALSE	FALSE	FALSE	FALSE	FALSE	FALSE
71	87	63	24	99	100	98	2	29	44	1	43	84	91	75	16	30	0	0	0	2	46000	1640	71	0	0.74	0	17.1029	0	0.941775	1.45333	2	1	0	0	0	0	0	0	FALSE	FALSE	FALSE	FALSE	FALSE	FALSE
83	100	75	25	99	100	95	5	15	25	1	24	84	113	66	47	70	0	0	0	2	78000	1560	81	0	0.83	0	32.0513	0	0.935609	1.51333	NA	NA	NA	NA	NA	NA	0	0	NA	FALSE	FALSE	FALSE	FALSE	TRUE
77	98	71	27	99	100	98	2	13	30	1	29	91	107	85	22	48	0	0	0	2	76000	1680	49	1	0.65	0	26.9274	0	1.07888	1.7	2	0	0	0	0	0	1	0	FALSE	FALSE	FALSE	FALSE	FALSE	TRUE
71	82	66	16	100	100	100	0	16	29	1	28	101	101	101	0	40	0	0	0	2	67000	1690	55	0	0.36	0	23.4586	1	1.00328	4.14667	2	0	0	1	0	0	0	0	FALSE	FALSE	FALSE	FALSE	FALSE	FALSE
94	115	89	26	96	100	91	9	18	27	2	25	76	139	61	78	100	0	0	0	2	114000	1780	71	0	0.59	0	35.9803	0	1.02241	3.10333	1	1	0	0	1	0	0	1	FALSE	FALSE	FALSE	FALSE	FALSE	TRUE
68	78	62	16	99	100	96	4	17	24	2	22	62	78	53	25	50	0	0	0	2	76000	1650	51	0	0.4	0	27.9155	0	0.975407	1.68333	1	0	0	0	0	1	0	0	FALSE	FALSE	TRUE	FALSE	FALSE	FALSE
60	70	56	14	97	100	97	3	12	46	2	44	60	83	52	31	50	0	0	0	2	73000	1600	58	0	0.35	0	28.5156	0	0.975317	1.35333	2	1	0	0	0	0	0	0	FALSE	FALSE	TRUE	FALSE	FALSE	FALSE
73	88	64	24	99	100	97	3	14	47	2	45	68	79	60	19	50	0	0	0	2	102000	1680	41	1	0.53	0	36.1395	0	1.07307	1.93333	2	0	0	0	0	1	1	0	FALSE	FALSE	FALSE	FALSE	FALSE	FALSE
72	86	65	21	98	100	96	4	18	33	2	31	70	81	54	27	50	0	0	0	2	95000	1800	52	0	0.63	0	29.321	1	1.00631	1.03	1	0	0	1	0	0	1	0	FALSE	FALSE	TRUE	FALSE	FALSE	FALSE
86	101	71	30	100	100	100	0	17	26	1	25	59	75	49	26	50	0	0	0	2	61000	1700	41	1	0.53	0	21.1073	1	1.01128	2.2	2	0	0	0	0	0	0	0	FALSE	FALSE	TRUE	FALSE	FALSE	FALSE
75	99	60	39	99	100	99	1	11	17	2	15	70	79	66	13	50	0	0	0	2	68000	1830	68	0	0.46	0	20.3052	0	0.951698	2.81333	2	0	0	0	0	0	0	0	FALSE	FALSE	FALSE	FALSE	FALSE	FALSE
77	85	71	14	99	100	93	7	9	26	2	24	68	82	57	25	50	0	0	0	2	83000	1750	67	1	0.25	0	27.102	1	0.986609	3.05333	2	0	0	0	0	0	0	0	FALSE	FALSE	FALSE	FALSE	FALSE	FALSE
92	107	70	37	100	100	100	0	17	31	2	29	72	92	64	28	50	0	0	0	2	97000	1820	68	0	0.4	0	29.2839	1	0.979455	0.903333	1	1	0	0	0	0	0	0	FALSE	FALSE	FALSE	FALSE	FALSE	FALSE
76	95	58	37	99	100	98	2	18	23	4	19	94	103	89	14	30	0	0	0	2	67000	1720	83	0	0.29	0	22.6474	1	0.938358	1.30333	2	1	0	0	0	0	0	0	FALSE	FALSE	FALSE	FALSE	FALSE	FALSE
79	92	57	35	96	100	66	34	9	23	1	22	83	118	61	57	65	0	0	0	2	33000	1500	71	1	0.37	0	14.6667	0	1.06105	1.63667	3	0	1	0	0	0	1	0	TRUE	TRUE	FALSE	FALSE	FALSE	TRUE
79	91	67	24	99	100	97	3	15	32	2	30	76	89	60	29	40	0	0	0	2	79000	1680	69	1	0.58	0	27.9904	1	0.98572	1.93	2	0	0	0	0	0	1	0	FALSE	FALSE	FALSE	FALSE	FALSE	FALSE
85	110	73	37	99	100	90	10	12	57	1	56	67	117	44	73	140	0	0	0	2	58000	1670	79	0	1.32	0	20.7967	0	0.946386	2.4	1	1	0	1	0	1	1	0	FALSE	TRUE	TRUE	FALSE	FALSE	TRUE
71	88	36	52	99	100	97	3	14	27	1	26	70	94	44	50	35	0	0	0	2	62000	1600	85	0	0.55	0	24.2188	0	0.956671	1.86333	1	0	0	0	0	0	1	0	FALSE	FALSE	TRUE	TRUE	FALSE	FALSE
77	91	62	29	99	100	93	7	26	38	2	36	85	97	80	17	35	0	0	0	2	92000	1680	60	1	0.5	0	32.5964	1	0.997648	1.40333	2	1	0	0	0	1	1	0	FALSE	FALSE	FALSE	FALSE	FALSE	FALSE
97	112	87	25	100	100	100	0	18	35	1	34	65	74	55	19	25	0	0	0	2	47000	1570	16	0	0.4	0	19.0677	1	1.07459	2.58667	2	0	0	0	0	0	1	0	FALSE	FALSE	TRUE	FALSE	FALSE	FALSE
76	85	71	14	100	100	100	0	19	32	2	30	72	87	64	23	37	0	0	0	2	73000	1670	26	0	0.26	0	26.1752	0	1.00321	2.14667	2	0	0	0	0	0	1	0	FALSE	FALSE	FALSE	FALSE	FALSE	FALSE
66	85	62	23	99	100	99	1	11	42	2	40	87	101	83	18	14	0	0	0	2	85000	1810	69	0	0.42	0	25.9455	0	0.965933	1.98333	1	0	0	0	0	0	1	0	FALSE	FALSE	FALSE	FALSE	FALSE	FALSE
64	83	57	26	100	100	100	0	17	31	4	27	74	87	65	22	35	0	0	0	2	66000	1600	46	0	0.39	0	25.7812	1	1.01461	1.73667	2	0	0	0	0	1	1	0	FALSE	FALSE	FALSE	FALSE	FALSE	FALSE
97	114	66	48	99	100	98	2	11	25	1	24	85	114	62	52	75	0	0	0	2	74000	1560	62	0	0.68	0	30.4076	1	0.992945	4.24667	1	0	0	0	0	0	1	0	FALSE	FALSE	FALSE	FALSE	FALSE	TRUE
86	102	71	31	99	100	97	3	13	26	1	25	78	95	70	25	34	0	0	0	2	60000	1670	64	0	0.31	0	21.5139	1	0.981506	2.31333	1	0	0	0	0	0	1	0	FALSE	FALSE	FALSE	FALSE	FALSE	FALSE
78	103	70	33	100	100	100	0	13	26	1	25	77	92	61	31	40	0	0	0	2	57000	1600	47	0	0.67	0	22.2656	1	1.01502	2.78667	1	0	0	0	0	0	1	0	FALSE	FALSE	FALSE	FALSE	FALSE	FALSE
75	87	69	18	99	100	96	4	13	44	2	42	75	113	62	51	15	0	0	0	2	78000	1570	80	0	0.53	0	31.6443	1	0.968513	1.94667	1	0	0	1	0	0	1	0	FALSE	FALSE	FALSE	FALSE	FALSE	TRUE
90	98	74	24	99	100	95	5	18	27	2	25	87	111	80	31	23	0	0	0	2	102000	1760	52	0	0.44	0	32.9287	0	0.994807	1.50333	1	0	0	0	0	0	1	0	FALSE	FALSE	FALSE	FALSE	FALSE	TRUE
74	87	58	29	99	100	95	5	12	45	2	43	80	99	73	26	19	0	0	0	2	96000	1900	59	1	0.58	0	26.5928	0	1.05996	2.18	NA	1	0	0	0	0	1	0	NA	FALSE	FALSE	FALSE	FALSE	FALSE
74	84	60	24	99	100	95	5	11	21	1	20	78	100	65	35	47	0	0	0	2	56000	1560	54	1	0.6	0	23.0112	1	0.993078	1.72	2	0	0	0	0	0	1	0	FALSE	FALSE	FALSE	FALSE	FALSE	FALSE
79	87	71	16	99	100	99	1	11	33	2	31	75	86	69	17	10	0	0	0	2	60000	1650	53	1	0.36	0	22.0386	1	0.992294	1.31333	1	1	0	0	0	0	1	0	FALSE	FALSE	FALSE	FALSE	FALSE	FALSE
82	102	72	30	100	100	100	0	12	29	2	27	84	100	71	29	10	0	0	0	2	60000	1600	58	1	0.48	0	23.4375	1	0.990772	2.15	1	0	0	0	0	0	1	0	FALSE	FALSE	FALSE	FALSE	FALSE	FALSE
63	77	52	25	100	100	100	0	9	35	2	33	68	91	55	36	50	0	0	0	2	55000	1560	70	1	0.5	0	22.6003	1	0.973615	2.07	2	0	0	0	0	0	1	0	FALSE	FALSE	TRUE	FALSE	FALSE	FALSE
73	86	67	19	99	100	97	3	8	20	1	19	78	88	73	15	10	0	0	0	2	72000	1720	56	0	0.47	0	24.3375	0	0.963974	1.7	2	1	0	1	0	0	1	0	FALSE	FALSE	FALSE	FALSE	FALSE	FALSE
85	93	75	18	99	100	99	1	22	44	1	43	96	114	77	37	45	0	3	0	2	66000	1630	49	0	0.82	1	24.841	1	0.804834	4.12	1	1	0	1	0	1	1	0	FALSE	FALSE	FALSE	FALSE	FALSE	TRUE
77	86	63	23	99	100	94	6	13	37	1	36	66	94	48	46	40	0	0	0	2	61000	1700	44	1	0.72	0	21.1073	1	1.00531	6.45	1	0	0	0	0	1	1	0	FALSE	FALSE	TRUE	FALSE	FALSE	FALSE
73	96	59	37	99	100	99	1	15	19	1	18	52	73	37	36	50	0	3	0	2	72000	1750	79	0	0.75	1	23.5102	0	1.11883	3.27	1	1	0	1	0	0	1	1	FALSE	FALSE	TRUE	FALSE	FALSE	FALSE
94	134	53	81	99	100	98	2	11	23	1	22	60	89	46	43	50	0	0	0	2	76000	1760	73	1	0.87	0	24.5351	0	1.03263	1.66667	2	1	0	0	0	0	1	0	FALSE	FALSE	TRUE	FALSE	TRUE	FALSE
62	75	57	18	100	100	100	0	11	30	1	29	78	89	64	25	40	0	5	0	2	82000	1700	52	0	0.49	1	28.3737	1	0.843319	0.986667	1	0	0	1	0	0	1	0	FALSE	FALSE	FALSE	FALSE	FALSE	FALSE
90	96	82	14	99	100	98	2	10	36	1	35	54	69	38	31	50	0	0	0	2	70000	1720	67	0	0.55	0	23.6614	1	0.975866	2.29667	1	1	0	0	0	0	0	0	FALSE	FALSE	TRUE	FALSE	FALSE	FALSE
85	115	74	41	99	100	98	2	16	29	1	28	79	122	52	70	40	0	3	0	2	78000	1720	60	0	0.51	1	26.3656	1	0.849815	1.59667	2	0	0	0	0	0	0	0	FALSE	FALSE	TRUE	FALSE	FALSE	TRUE
87	137	73	64	99	100	97	3	12	59	1	58	71	97	60	37	50	0	0	0	2	56000	1580	57	1	0.57	0	22.4323	1	0.988811	1.91667	2	0	0	0	0	0	0	0	FALSE	FALSE	FALSE	FALSE	TRUE	FALSE
70	82	65	17	100	100	100	0	12	22	1	21	61	83	51	32	45	0	0	0	2	63000	1710	75	0	0.53	0	21.5451	0	0.959251	2.74667	3	1	1	0	0	0	0	1	TRUE	FALSE	TRUE	FALSE	FALSE	FALSE
84	106	76	30	99	100	98	2	16	22	1	21	77	90	69	21	40	0	3	0	2	100000	1780	66	0	0.35	1	31.5617	0	0.993983	1.99667	1	0	0	0	0	0	0	0	FALSE	FALSE	FALSE	FALSE	FALSE	FALSE
60	63	58	5	100	100	100	0	13	27	1	26	55	66	47	19	35	0	0	0	2	58000	1750	25	0	0.37	0	18.9388	1	1.05793	3.07	1	0	0	0	0	1	1	0	FALSE	FALSE	TRUE	FALSE	FALSE	FALSE
80	99	68	31	99	100	91	9	14	33	1	32	83	105	72	33	30	0	0	0	2	76000	1700	53	0	0.3	0	26.2976	0	0.969809	2.58	1	1	0	0	0	0	1	0	FALSE	FALSE	FALSE	FALSE	FALSE	TRUE
62	74	55	19	100	100	100	0	13	45	1	44	105	119	89	30	45	0	0	0	2	51000	1630	80	0	0.66	0	19.1953	1	0.941578	2.86333	2	0	0	0	0	0	0	0	FALSE	FALSE	FALSE	FALSE	FALSE	TRUE
77	85	71	14	93	95	90	5	12	44	1	43	80	100	69	31	48	0	0	0	2	94000	1910	72	1	0.45	0	25.7668	0	1.13532	3.03333	4	1	0	0	0	0	0	0	TRUE	TRUE	FALSE	FALSE	FALSE	FALSE
62	70	59	11	98	100	68	32	11	52	1	51	91	99	79	20	25	0	0	0	2	120000	1780	66	0	0.47	0	37.874	0	0.998252	1.9	4	0	0	0	0	0	1	0	TRUE	TRUE	FALSE	FALSE	FALSE	FALSE
105	117	96	21	99	100	94	6	9	20	2	18	78	83	70	13	30	0	0	0	2	57000	1600	60	0	0.42	0	22.2656	1	0.992458	1.4	1	0	0	0	0	0	1	0	FALSE	FALSE	FALSE	FALSE	FALSE	FALSE
69	75	60	15	99	100	97	3	14	43	1	42	80	89	71	18	20	0	0	0	2	80000	1700	72	0	0.39	0	27.6817	1	0.956941	1.77	4	1	0	0	0	0	1	0	TRUE	FALSE	FALSE	FALSE	FALSE	FALSE
67	80	52	28	99	100	95	5	18	29	2	27	69	97	53	44	45	0	0	0	2	74000	1750	70	0	0.51	0	24.1633	1	0.969123	2.16333	1	0	0	0	0	0	1	0	FALSE	FALSE	TRUE	FALSE	FALSE	FALSE
73	93	58	35	100	100	100	0	14	28	2	26	62	84	49	35	40	0	0	0	2	78000	1820	30	1	0.5	0	23.5479	1	1.02355	1.91667	1	0	0	0	0	0	1	0	FALSE	FALSE	TRUE	FALSE	FALSE	FALSE
94	102	80	22	98	100	94	6	15	28	2	26	77	89	65	24	30	0	0	0	2	115000	1780	74	0	0.42	0	36.2959	1	0.98317	1.53333	3	0	0	0	0	0	1	0	TRUE	FALSE	FALSE	FALSE	FALSE	FALSE
71	98	63	35	99	100	90	10	7	27	2	25	88	104	71	33	50	0	0	0	2	56000	1700	57	1	0.48	0	19.3772	1	0.981549	1.83333	1	1	0	1	0	0	1	0	FALSE	TRUE	FALSE	FALSE	FALSE	FALSE
91	98	76	22	98	100	96	4	10	26	3	23	77	118	59	59	80	0	0	0	2	60000	1650	80	0	0.75	0	22.0386	0	0.949454	2.83	2	1	0	0	0	0	1	0	FALSE	FALSE	FALSE	FALSE	FALSE	TRUE
87	102	81	21	98	100	95	5	20	38	2	36	88	97	81	16	50	0	0	0	2	80000	1750	52	0	0.37	0	26.1224	0	0.969704	1.28667	1	0	0	0	0	0	1	0	FALSE	FALSE	FALSE	FALSE	FALSE	FALSE
71	112	58	54	100	100	100	0	18	27	2	25	62	80	51	29	40	0	0	0	2	93000	1780	86	0	0.3	0	29.3524	1	0.95261	1.60333	1	0	0	0	0	0	1	0	FALSE	FALSE	TRUE	FALSE	FALSE	FALSE
77	96	71	25	100	100	100	0	12	28	2	26	76	106	61	45	50	0	0	0	2	60000	1650	72	1	0.82	0	22.0386	1	0.970369	1.57	2	1	0	0	0	NA	0	0	FALSE	FALSE	FALSE	FALSE	FALSE	TRUE
73	87	68	19	99	100	99	1	14	23	2	21	69	81	60	21	60	0	0	0	2	62000	1600	70	0	0.42	0	24.2188	1	0.969173	2.48667	2	0	0	0	0	0	1	0	FALSE	FALSE	FALSE	FALSE	FALSE	FALSE
76	86	67	19	99	100	99	1	29	77	2	75	87	102	79	23	50	0	0	0	2	90000	1850	79	0	0.43	0	26.2966	0	0.978735	3.16333	3	0	0	0	0	0	1	0	TRUE	FALSE	FALSE	FALSE	FALSE	FALSE
76	100	42	58	99	100	98	2	16	31	1	30	68	107	58	49	50	0	0	0	2	65000	1630	67	0	0.53	0	24.4646	1	0.959013	2.63333	3	1	0	0	0	1	1	0	TRUE	FALSE	FALSE	TRUE	FALSE	TRUE
105	113	82	31	99	100	96	4	17	37	2	35	86	99	75	24	65	0	0	0	2	79000	1730	58	0	0.35	0	26.3958	0	0.968993	1.95333	1	1	0	1	0	0	1	0	FALSE	FALSE	FALSE	FALSE	FALSE	FALSE
91	123	77	46	94	100	84	16	11	30	1	29	65	96	53	43	50	0	0	0.5	2	60000	1600	63	1	0.54	2	23.4375	1	0.459745	1.13667	2	0	0	0	0	NA	1	0	FALSE	TRUE	TRUE	FALSE	TRUE	FALSE
82	96	56	40	97	100	84	16	6	31	2	29	76	88	68	20	45	0	0	0	2	70000	1680	54	1	0.34	0	24.8016	0	1.06901	1.58667	2	0	0	0	0	1	1	0	FALSE	TRUE	FALSE	FALSE	FALSE	FALSE
82	99	49	50	99	100	95	5	12	24	1	23	61	80	41	39	40	0	0	0	2	74000	1640	83	1	0.55	0	27.5134	0	1.09308	1.19667	3	1	0	1	0	0	1	0	TRUE	FALSE	TRUE	TRUE	FALSE	FALSE
69	78	62	16	100	100	100	0	14	20	2	18	72	83	66	17	45	0	0	0	2	69000	1500	32	0	0.37	0	30.6667	0	0.995693	2.00333	1	0	0	0	0	0	1	0	FALSE	FALSE	FALSE	FALSE	FALSE	FALSE
79	93	72	21	99	100	95	5	11	22	2	20	80	92	73	19	45	0	0	0	2	49000	1610	40	0	0.25	0	18.9036	0	0.969235	1.48333	1	0	0	0	0	0	1	0	FALSE	FALSE	FALSE	FALSE	FALSE	FALSE
76	87	58	29	99	100	99	1	10	37	1	36	70	79	59	20	67	0	0	0	2	50000	1680	36	0	0.4	0	17.7154	0	0.93131	1.84667	3	0	0	0	0	0	1	0	TRUE	FALSE	FALSE	FALSE	FALSE	FALSE
72	95	60	35	100	100	100	0	17	25	2	23	68	72	65	7	45	0	0	0	2	77000	1860	32	0	0.43	0	22.2569	0	0.98824	1.36667	1	0	0	1	0	1	1	0	FALSE	FALSE	FALSE	FALSE	FALSE	FALSE
76	96	68	28	99	100	97	3	15	29	2	27	81	93	72	21	40	0	0	0	2	45000	1610	70	0	0.25	0	17.3604	1	0.94037	1.44667	3	0	0	0	0	0	1	0	TRUE	FALSE	FALSE	FALSE	FALSE	FALSE
83	94	71	23	97	100	88	12	6	28	1	27	85	99	74	25	45	0	0	0	2	65000	1630	63	1	0.42	0	24.4646	0	1.04956	1.66667	2	1	0	0	0	0	1	0	FALSE	TRUE	FALSE	FALSE	FALSE	FALSE
60	70	54	16	100	100	100	0	12	19	1	18	59	86	41	45	45	25	0	0	2	120000	1700	79	0	0.73	3	41.5225	0	0.798389	1.34667	1	1	0	1	0	0	0	0	FALSE	FALSE	TRUE	FALSE	FALSE	FALSE
65	79	56	23	100	100	100	0	16	30	1	29	53	73	38	35	20	20	0	0	2	64000	1680	81	0	0.73	3	22.6757	1	1.74744	4.63	2	0	0	0	0	0	0	0	FALSE	FALSE	TRUE	FALSE	FALSE	FALSE
69	93	52	41	99	100	95	5	13	24	2	22	88	101	75	26	50	0	0	0	2	100000	1690	62	0	0.46	0	35.0128	0	0.992962	4.63	1	0	0	1	0	0	0	1	FALSE	FALSE	FALSE	FALSE	FALSE	FALSE
79	90	58	32	99	100	99	1	19	26	1	25	54	61	47	14	50	0	0	0	2	68000	1410	77	0	0.72	0	34.2035	1	0.974402	4.08667	3	0	0	0	0	0	0	1	TRUE	FALSE	TRUE	FALSE	FALSE	FALSE
64	83	54	29	100	100	100	0	13	31	2	29	56	64	50	14	50	0	0	0	2	69000	1630	59	0	0.9	0	25.9701	1	1.00045	3.13667	2	0	0	1	0	0	0	1	FALSE	FALSE	TRUE	FALSE	FALSE	FALSE
72	79	51	28	100	100	100	0	15	34	2	32	65	87	54	33	50	0	0	0	2	47000	1500	46	1	0.57	0	20.8889	1	1.2772	1.25333	3	0	0	1	0	1	0	0	TRUE	FALSE	TRUE	FALSE	FALSE	FALSE
84	108	64	44	98	100	94	6	15	38	1	37	76	109	56	53	30	0	0	0	2	75000	1600	50	0	0.39	0	29.2969	1	1.00794	2.50333	1	0	0	0	0	0	1	0	FALSE	FALSE	FALSE	FALSE	FALSE	TRUE
88	99	78	21	92	97	91	6	14	21	1	20	105	117	98	19	40	0	0	0	2	104000	1820	46	1	0.4	0	31.3972	0	1.0763	1.67	2	1	0	0	0	0	0	0	FALSE	FALSE	FALSE	FALSE	FALSE	TRUE
78	91	57	34	100	100	100	0	13	33	2	31	83	100	68	32	27	0	0	0	2	74500	1690	63	0	0.32	0	26.0845	1	0.989012	1.57	2	0	0	0	0	0	1	0	FALSE	FALSE	FALSE	FALSE	FALSE	FALSE
67	75	58	17	99	100	98	2	9	23	2	21	80	91	69	22	30	0	0	0	2	144000	1750	69	0	0.49	0	47.0204	0	1.01324	1.77	1	1	0	0	0	0	1	0	FALSE	FALSE	FALSE	FALSE	FALSE	FALSE
86	104	78	26	97	100	86	14	14	31	1	30	67	108	51	57	75	0	0	0	2	118000	1850	60	1	1.22	0	34.4777	0	1.06915	3.15	2	1	0	0	0	0	0	0	FALSE	TRUE	TRUE	FALSE	FALSE	TRUE
97	122	67	55	99	100	98	2	19	28	1	27	61	72	52	20	80	0	0	0	2	75000	1750	67	0	0.95	0	24.4898	0	0.96355	3.48	3	0	0	0	0	0	1	1	TRUE	FALSE	TRUE	FALSE	TRUE	FALSE
81	103	73	30	99	100	96	4	14	25	1	24	91	101	83	18	30	0	0	0	2	79000	1660	74	0	0.35	0	28.6689	0	0.974965	5.83333	1	1	0	0	0	0	0	0	FALSE	FALSE	FALSE	FALSE	FALSE	FALSE
91	112	86	26	99	100	99	1	20	33	1	32	49	67	42	25	35	0	0	0	2	70000	1800	53	0	0.82	0	21.6049	0	0.959169	5.96667	1	0	0	0	0	1	0	1	FALSE	FALSE	TRUE	FALSE	FALSE	FALSE
73	88	69	19	100	100	99	1	17	38	1	37	68	78	58	20	50	0	0	0	2	105000	1770	78	0	0.9	0	33.5153	0	1.02471	5.35333	3	0	0	0	1	1	0	0	TRUE	FALSE	FALSE	FALSE	FALSE	FALSE
93	105	83	22	100	100	100	0	22	31	1	30	77	99	68	31	50	0	0	0	2	44000	1520	73	0	0.68	0	19.0443	1	0.957457	4.13	2	1	0	1	0	1	0	0	FALSE	FALSE	FALSE	FALSE	FALSE	FALSE
68	86	66	20	89	96	85	11	20	31	1	30	51	73	42	31	50	0	0	0	3	97000	1700	64	0	0.6	0	33.564	0	0.901577	1.46333	NA	NA	NA	NA	NA	NA	0	0	NA	TRUE	TRUE	FALSE	FALSE	FALSE
69	96	56	40	100	100	100	0	16	29	2	27	66	95	54	41	50	0	0	0	2	82000	1700	83	0	0.58	0	28.3737	0	0.967342	1.44667	1	1	0	0	0	0	0	0	FALSE	FALSE	TRUE	FALSE	FALSE	FALSE
85	96	75	21	99	100	95	5	16	77	1	76	94	103	85	18	50	0	0	0	2	81000	1780	58	0	0.48	0	25.565	0	0.966631	1.63333	2	0	1	0	0	0	1	0	FALSE	FALSE	FALSE	FALSE	FALSE	FALSE
80	86	65	21	100	100	100	0	13	29	1	28	80	109	69	40	50	0	0	0	2	52000	1680	70	0	0.57	0	18.424	1	0.964095	1.60333	1	0	0	0	0	0	1	0	FALSE	FALSE	FALSE	FALSE	FALSE	TRUE
84	99	62	37	98	100	89	11	10	27	1	26	85	106	76	30	50	0	0	0	2	95000	1800	56	1	0.46	0	29.321	0	1.18261	1.51333	3	0	0	1	0	0	1	0	TRUE	TRUE	FALSE	FALSE	FALSE	TRUE
80	88	73	15	98	100	93	7	23	35	1	34	80	96	68	28	50	0	0	0	2	100000	1770	73	0	0.69	0	31.9193	0	0.980395	1.83667	1	1	0	0	0	0	1	0	FALSE	FALSE	FALSE	FALSE	FALSE	FALSE
67	78	54	24	99	100	99	1	12	21	1	20	59	74	50	24	50	0	0	0	2	67000	1770	76	0	0.54	0	21.3859	0	0.949537	1.87	2	0	0	0	0	0	1	0	FALSE	FALSE	TRUE	FALSE	FALSE	FALSE
66	80	59	21	99	100	95	5	16	26	1	25	77	80	74	6	50	0	0	0	2	64000	1690	34	0	0.35	0	22.4082	1	1.03774	1.75333	2	0	0	0	0	0	1	0	FALSE	FALSE	FALSE	FALSE	FALSE	FALSE
64	79	55	24	98	100	94	6	14	32	1	31	71	134	48	86	60	0	0	0	2	98000	1700	67	1	0.65	0	33.91	0	1.06811	5.43	2	1	0	0	0	0	1	0	FALSE	FALSE	TRUE	FALSE	FALSE	TRUE
69	83	57	26	100	100	99	1	16	40	1	39	60	88	41	47	40	0	0	0	2	49000	1670	50	1	0.78	0	17.5697	0	1.12548	1.85	3	0	0	0	0	0	1	1	TRUE	FALSE	TRUE	FALSE	FALSE	FALSE
84	95	72	23	100	100	100	0	17	28	1	27	53	78	44	34	62	0	0	0	2	80000	1700	66	0	0.77	0	27.6817	0	0.971698	3.78667	3	1	0	0	0	0	1	1	TRUE	FALSE	TRUE	FALSE	FALSE	FALSE
74	93	54	39	99	100	97	3	16	48	1	47	55	78	46	32	40	0	0	0	2	63000	1600	87	1	0.89	0	24.6094	1	0.951545	3.07	1	1	0	0	0	0	0	1	FALSE	FALSE	TRUE	FALSE	FALSE	FALSE
79	85	77	8	95	97	94	3	14	21	1	20	72	74	71	3	78	50	0	0	2	90000	1770	64	1	0.65	3	28.7274	0	0.696793	1.66333	NA	NA	NA	NA	NA	NA	0	0	NA	FALSE	FALSE	FALSE	FALSE	FALSE
93	132	79	53	97	100	94	6	17	35	1	34	78	101	61	40	80	0	0	0	1	70000	1650	43	1	0.76	0	25.7117	1	1.11599	2.01333	3	0	0	0	0	1	1	0	TRUE	FALSE	FALSE	FALSE	TRUE	FALSE
68	127	56	71	99	100	92	8	17	30	1	29	77	93	57	36	70	0	0	0	2	80000	1720	50	0	0.77	0	27.0416	0	1.03257	1.28333	2	0	0	0	1	1	1	0	FALSE	FALSE	FALSE	FALSE	TRUE	FALSE
74	90	67	23	100	100	100	0	14	25	2	23	77	86	67	19	50	0	0	0	2	64000	1660	63	0	0.45	0	23.2254	1	0.985722	3.02	NA	0	0	0	0	1	1	0	NA	FALSE	FALSE	FALSE	FALSE	FALSE
84	100	72	28	100	100	100	0	13	32	1	31	71	102	58	44	100	0	0	0	2	93000	1850	68	0	0.64	0	27.1731	0	0.969928	2.53667	2	1	0	0	0	0	0	1	FALSE	FALSE	FALSE	FALSE	FALSE	FALSE
81	101	70	31	100	100	100	0	17	25	3	22	65	73	59	14	100	0	0	0	2	93000	1810	53	1	0.41	0	28.3874	0	1.0711	2.98	1	1	0	0	0	0	1	0	FALSE	FALSE	FALSE	FALSE	FALSE	FALSE
70	99	62	37	99	100	98	2	19	28	3	25	55	77	45	32	50	0	0	0	2	62000	1580	58	0	0.48	0	24.8358	1	1.00064	2.81667	2	1	0	0	0	0	1	0	FALSE	FALSE	TRUE	FALSE	FALSE	FALSE
58	72	34	38	100	100	100	0	14	35	6	29	77	106	55	51	50	0	0	0	1	50000	1450	86	0	0.51	0	23.7812	1	1.01459	1.68	4	0	0	0	0	0	0	0	TRUE	FALSE	TRUE	TRUE	FALSE	TRUE
84	102	68	34	98	100	92	8	26	38	2	36	65	92	49	43	50	0	0	0	2	75000	1670	88	0	0.67	0	26.8923	1	0.935859	2.38333	NA	NA	NA	NA	NA	NA	1	0	NA	FALSE	TRUE	FALSE	FALSE	FALSE
92	106	66	40	89	95	86	9	26	38	4	34	85	107	51	56	50	0	0	0	2	64000	1740	56	1	1.09	0	21.1389	0	1.06192	2.55333	2	1	0	0	0	0	0	0	FALSE	TRUE	TRUE	FALSE	FALSE	TRUE
68	82	65	17	99	100	98	2	9	20	2	18	62	68	55	13	50	0	0	0.5	2	79000	1590	73	1	0.7	2	31.2488	1	0.416443	2.85333	2	0	0	1	0	0	0	0	FALSE	FALSE	TRUE	FALSE	FALSE	FALSE
85	116	81	35	98	100	98	2	20	31	7	24	90	107	79	28	50	0	0	0	2	81000	1660	67	0	0.23	0	29.3947	0	0.978589	2.03333	1	1	0	1	0	1	0	0	FALSE	FALSE	FALSE	FALSE	FALSE	TRUE
70	83	65	18	100	100	100	0	15	44	10	34	70	74	68	6	30	0	0	0	2	69000	1650	62	0	0.22	0	25.3444	1	0.970534	1.63333	3	1	0	0	0	0	0	0	TRUE	FALSE	FALSE	FALSE	FALSE	FALSE
81	94	73	21	100	100	100	0	21	32	1	31	68	78	59	19	50	0	0	0	2	62000	1680	58	0	0.97	0	21.9671	0	0.958306	2.50333	1	0	0	0	0	1	0	0	FALSE	FALSE	FALSE	FALSE	FALSE	FALSE
81	86	77	9	99	100	99	1	29	36	8	28	85	117	58	59	50	0	0	0	2	61000	1700	81	0	0.57	0	21.1073	0	0.946157	1.48333	1	1	0	0	0	0	0	0	FALSE	FALSE	FALSE	FALSE	FALSE	TRUE
75	97	67	30	99	100	95	5	11	37	2	35	64	82	52	30	55	0	0	0	2	82000	1720	76	0	0.78	0	27.7177	1	0.959841	4.1	1	0	0	0	0	0	0	0	FALSE	FALSE	TRUE	FALSE	FALSE	FALSE
72	85	61	24	99	100	97	3	15	23	8	15	69	80	61	19	50	0	0	0	2	73000	1820	71	0	1.22	0	22.0384	0	0.95447	2.52	1	0	0	0	0	0	1	1	FALSE	FALSE	FALSE	FALSE	FALSE	FALSE
66	80	60	20	100	100	100	0	15	29	2	27	85	96	80	16	35	0	0	0	2	53000	1500	61	0	0.25	0	23.5556	1	0.968072	1.58333	3	1	0	0	0	1	0	0	TRUE	FALSE	FALSE	FALSE	FALSE	FALSE
78	95	72	23	99	100	97	3	14	35	1	34	93	127	78	49	50	0	0	0	2	75000	1750	71	0	0.73	0	24.4898	0	0.961975	1.35	2	1	0	0	0	0	0	0	FALSE	FALSE	FALSE	FALSE	FALSE	TRUE
97	115	80	35	100	100	100	0	19	32	2	30	90	181	50	131	60	0	0	0	2	53000	1700	23	0	0.5	0	18.3391	1	1.06203	4.16333	1	0	0	0	0	0	0	0	FALSE	FALSE	TRUE	FALSE	FALSE	TRUE
90	94	80	14	99	100	96	4	12	28	1	27	63	80	43	37	60	0	0	0	2	103000	1650	42	0	0.3	0	37.8329	1	1.00856	3.41333	2	1	0	0	0	0	0	0	FALSE	FALSE	TRUE	FALSE	FALSE	FALSE
99	116	77	39	99	100	99	1	21	34	3	31	56	65	49	16	100	0	0	0	2	108000	1620	32	0	0.42	0	41.1523	1	1.03206	3.22	1	0	0	0	0	NA	0	0	FALSE	FALSE	TRUE	FALSE	FALSE	FALSE
93	119	77	42	100	100	100	0	15	32	2	30	63	87	53	34	55	0	0	0	2	66000	1720	31	1	0.5	0	22.3094	0	1.10437	3.08	1	0	0	0	0	0	0	0	FALSE	FALSE	TRUE	FALSE	FALSE	FALSE
64	71	59	12	100	100	100	0	23	31	2	29	69	78	65	13	40	0	0	0	2	48000	1600	37	0	0.27	0	18.75	1	1.02919	1.97	1	0	0	0	0	1	0	0	FALSE	FALSE	FALSE	FALSE	FALSE	FALSE
75	85	69	16	99	100	98	2	11	44	1	43	68	84	58	26	50	0	0	0	2	60000	1650	40	1	0.64	0	22.0386	1	1.0137	2.20333	1	0	0	0	0	0	0	0	FALSE	FALSE	FALSE	FALSE	FALSE	FALSE
72	86	62	24	99	100	91	9	20	33	2	31	61	97	49	48	40	0	0	0	2	88000	1650	69	0	0.85	0	32.3232	0	0.983079	3.32	2	1	1	1	0	0	1	0	FALSE	FALSE	TRUE	FALSE	FALSE	FALSE
79	103	41	62	99	100	94	6	21	72	2	70	89	116	64	52	52	0	0	0	2	60000	1650	66	1	0.95	0	22.0386	1	0.977168	3.91667	1	0	0	0	0	0	1	0	FALSE	FALSE	FALSE	TRUE	FALSE	TRUE
101	140	83	57	99	100	97	3	15	32	1	31	79	89	72	17	40	35	0	0	2	76000	1570	21	1	0.56	3	30.8329	0	0.575366	2.13	1	0	0	0	0	1	1	0	FALSE	FALSE	FALSE	FALSE	TRUE	FALSE
69	82	54	28	100	100	100	0	15	20	2	18	63	72	54	18	48	0	0	0	2	61000	1540	38	0	0.28	0	25.721	0	0.981485	2.23	1	1	0	0	0	1	0	0	FALSE	FALSE	TRUE	FALSE	FALSE	FALSE
72	86	57	29	99	100	93	7	14	25	2	23	74	96	60	36	45	35	0	0	2	50000	1520	57	1	0.42	3	21.6413	0	0.659653	1.98667	2	0	0	0	0	0	1	0	FALSE	FALSE	FALSE	FALSE	FALSE	FALSE
95	115	67	48	100	100	100	0	10	19	2	17	75	87	67	20	30	0	0	0	2	74000	1620	49	0	0.33	0	28.1969	0	0.977328	0.816667	2	0	0	0	0	1	1	0	FALSE	FALSE	FALSE	FALSE	FALSE	FALSE
87	97	78	19	99	100	99	1	15	34	2	32	97	109	87	22	45	0	0	0	2	64000	1660	52	1	0.38	0	23.2254	1	0.995614	2.98	2	0	0	0	0	0	0	0	FALSE	FALSE	FALSE	FALSE	FALSE	TRUE
64	72	56	16	99	100	96	4	11	26	2	24	75	100	64	36	45	0	0	0	2	75000	1640	51	1	0.49	0	27.8852	1	1.00202	1.85333	2	0	0	0	0	0	0	0	FALSE	FALSE	FALSE	FALSE	FALSE	FALSE
82	96	72	24	99	100	96	4	17	25	2	23	98	130	82	48	35	0	0	0	2	86000	1550	53	0	0.27	0	35.796	1	1.0073	1.95	4	0	0	0	0	0	1	1	TRUE	FALSE	FALSE	FALSE	FALSE	TRUE
91	116	66	50	99	100	98	2	13	19	4	15	83	107	67	40	10	0	0	0	2	93000	1640	78	0	0.2	0	34.5776	0	1.00516	0.633333	3	1	0	0	0	0	0	0	TRUE	FALSE	FALSE	FALSE	FALSE	TRUE
67	81	58	23	99	100	99	1	9	20	3	17	61	85	50	35	35	0	0	0	2	85000	1650	48	1	0.58	0	31.2213	1	0.998344	1.15	1	0	0	1	0	0	0	0	FALSE	FALSE	TRUE	FALSE	FALSE	FALSE
67	80	63	17	100	100	100	0	17	39	1	38	84	108	74	34	50	0	0	0	2	70000	1680	69	0	0.52	0	24.8016	1	0.972077	2.07	1	0	0	0	0	0	0	1	FALSE	FALSE	FALSE	FALSE	FALSE	TRUE
88	103	70	33	99	100	97	3	17	33	1	32	79	113	66	47	50	0	0	0	2	96500	1620	66	0	0.45	0	36.7703	1	0.986189	2.95	2	1	0	0	0	0	0	0	FALSE	FALSE	FALSE	FALSE	FALSE	TRUE
70	85	62	23	99	100	86	14	13	30	1	29	62	80	44	36	50	0	0	0	2	33000	1500	76	0	0.67	0	14.6667	1	0.947898	2.76667	1	1	0	0	0	0	0	0	FALSE	TRUE	TRUE	FALSE	FALSE	FALSE
56	73	50	23	95	100	84	16	14	46	1	45	83	92	73	19	50	0	0	0	2	80000	1650	70	0	0.36	0	29.3848	0	0.977568	3.26333	1	0	0	0	0	0	0	0	FALSE	TRUE	FALSE	TRUE	FALSE	FALSE
97	114	84	30	99	100	95	5	25	44	2	42	61	83	40	43	50	0	0	0	1	46000	1570	78	1	0.65	0	18.662	1	0.934958	1.7	1	0	0	0	0	0	1	0	FALSE	FALSE	TRUE	FALSE	FALSE	FALSE
85	92	79	13	100	100	100	0	21	27	1	26	64	90	48	42	50	0	0	0	2	75000	1700	84	0	0.46	0	25.9516	0	0.925283	1.29667	NA	NA	NA	NA	NA	NA	0	0	NA	FALSE	TRUE	FALSE	FALSE	FALSE
89	111	80	31	97	99	95	4	21	39	1	38	85	105	71	34	50	0	0	0	1	104000	1580	61	0	0.5	0	41.66	1	1.05484	2.25333	3	1	0	0	0	0	0	0	TRUE	FALSE	FALSE	FALSE	FALSE	TRUE
72	86	56	30	100	100	100	0	17	47	1	46	71	92	56	36	50	0	0	0	3	59000	1540	71	1	0.63	0	24.8777	1	1.03948	2.93	2	0	0	0	0	0	0	0	FALSE	FALSE	FALSE	FALSE	FALSE	FALSE
82	102	56	46	99	100	99	1	14	42	1	41	66	94	52	42	60	0	0	0	2	88000	1840	60	0	0.72	0	25.9924	0	0.967511	2.62	2	0	0	0	0	0	0	0	FALSE	FALSE	TRUE	FALSE	FALSE	FALSE
89	98	69	29	98	100	94	6	18	26	1	25	86	109	77	32	50	0	0	0	2	85000	1680	53	1	0.36	0	30.1162	1	1.00027	1.53	2	0	0	1	0	1	1	0	FALSE	FALSE	FALSE	FALSE	FALSE	TRUE
75	91	60	31	99	100	97	3	11	34	1	33	79	89	73	16	50	0	0	0	2	85000	1650	43	0	0.5	0	31.2213	1	1.01256	1.64667	2	1	0	0	0	0	1	0	FALSE	FALSE	FALSE	FALSE	FALSE	FALSE
84	103	76	27	99	100	95	5	16	31	2	29	77	96	64	32	50	0	0	0	2	75000	1700	72	0	0.48	0	25.9516	1	0.966124	1.85	2	1	0	0	0	0	1	0	FALSE	FALSE	FALSE	FALSE	FALSE	FALSE
75	98	64	34	100	100	100	0	12	38	1	37	72	92	56	36	50	0	0	0	2	49000	1610	85	0	0.38	0	18.9036	1	0.931469	1.98333	2	1	0	0	0	0	1	0	FALSE	FALSE	FALSE	FALSE	FALSE	FALSE
83	99	74	25	99	100	99	1	15	28	1	27	60	69	53	16	45	0	0	0	2	75000	1770	17	1	0.65	0	23.9395	1	1.04115	4.18667	2	0	0	0	0	NA	0	0	FALSE	FALSE	TRUE	FALSE	FALSE	FALSE
77	90	57	33	100	100	100	0	20	26	1	25	66	82	59	23	50	0	0	0	2	55000	1800	25	0	0.4	0	16.9753	0	0.98537	3.43	1	0	0	0	0	1	0	0	FALSE	FALSE	FALSE	FALSE	FALSE	FALSE
77	92	63	29	100	100	100	0	15	40	2	38	82	86	80	6	40	0	0	0	2	80000	1660	52	0	0.35	0	29.0318	0	0.961032	3.98333	3	0	0	0	0	0	0	0	TRUE	FALSE	FALSE	FALSE	FALSE	FALSE
69	89	64	25	99	100	97	3	14	30	3	27	65	75	54	21	50	0	0	0	3	78000	1600	64	0	0.5	0	30.4688	0	1.13326	3.55333	1	0	0	0	1	0	0	0	FALSE	FALSE	TRUE	FALSE	FALSE	FALSE
59	79	54	25	99	100	99	1	13	26	1	25	86	110	68	42	50	0	0	0	2	79000	1720	68	0	0.65	0	26.7036	0	0.968168	4.23	2	1	0	0	0	0	1	0	FALSE	FALSE	FALSE	FALSE	FALSE	TRUE
71	103	62	41	99	100	98	2	17	50	1	49	70	81	63	18	45	0	0	0	2	60000	1700	29	1	0.7	0	20.7612	0	1.10277	2.87	1	0	0	0	0	1	0	0	FALSE	FALSE	FALSE	FALSE	FALSE	FALSE
78	101	59	42	99	100	98	2	18	82	1	81	85	100	71	29	30	0	0	0	3	75000	1640	31	0	0.33	0	27.8852	1	1.10228	3.85	1	0	0	0	0	0	1	0	FALSE	FALSE	FALSE	FALSE	FALSE	FALSE
63	95	56	39	99	100	99	1	15	40	1	39	69	79	61	18	40	0	0	0	1	60000	1650	73	0	0.65	0	22.0386	0	1.00139	2.62	2	0	0	0	0	0	1	1	FALSE	FALSE	FALSE	FALSE	FALSE	FALSE
80	93	69	24	100	100	100	0	25	55	2	53	69	82	63	19	25	0	0	0	1	96000	1600	40	0	0.51	0	37.5	0	1.02336	2.21333	3	0	0	0	0	1	1	1	TRUE	FALSE	FALSE	FALSE	FALSE	FALSE
73	82	62	20	99	100	93	7	26	40	1	39	56	70	47	23	35	0	0	0	1	68000	1840	78	1	0.62	0	20.0851	1	0.992322	1.77	NA	NA	NA	NA	NA	NA	1	0	NA	FALSE	TRUE	FALSE	FALSE	FALSE
95	117	74	43	97	100	87	13	16	43	1	42	70	121	55	66	40	0	0	0	2	65000	1650	46	1	0.4	0	23.8751	1	1.00442	3.19667	2	0	0	0	0	0	0	0	FALSE	TRUE	TRUE	FALSE	FALSE	TRUE
86	101	75	26	99	100	98	2	15	26	1	25	86	100	71	29	40	0	0	0	2	115000	1970	47	0	0.37	0	29.6323	0	0.98345	2.65333	1	0	0	0	0	0	0	0	FALSE	FALSE	FALSE	FALSE	FALSE	FALSE
61	74	54	20	97	100	93	7	15	28	1	27	93	109	86	23	30	0	0	0	2	91500	1810	60	0	0.34	0	27.9296	0	0.973063	1.80333	1	0	0	0	0	0	0	0	FALSE	FALSE	FALSE	FALSE	FALSE	TRUE
89	99	77	22	99	100	98	2	13	27	1	26	70	101	57	44	50	0	0	0	2	74000	1670	84	0	0.63	0	26.5338	0	0.964203	2.03333	2	1	0	0	0	0	1	0	FALSE	FALSE	FALSE	FALSE	FALSE	FALSE
82	94	76	18	100	100	100	0	17	43	2	41	82	100	70	30	50	0	0	0	2	105000	1770	78	0	0.38	0	33.5153	0	1.02471	0.966667	3	0	0	0	1	1	1	0	TRUE	FALSE	FALSE	FALSE	FALSE	FALSE
55	71	47	24	100	100	100	0	20	33	2	31	76	81	71	10	45	0	0	0	2	85000	1900	42	0	0.17	0	23.5457	1	1.02181	3.08333	2	0	0	0	0	1	0	0	FALSE	FALSE	FALSE	TRUE	FALSE	FALSE
59	73	34	39	100	100	100	0	14	28	1	27	90	150	75	75	45	0	0	0	2	67000	1670	67	0	0.58	0	24.0238	0	0.942785	1.08333	NA	NA	NA	NA	NA	NA	0	0	NA	FALSE	FALSE	TRUE	FALSE	TRUE
107	120	101	19	99	100	92	8	16	36	1	35	71	92	52	40	80	0	0	0	2	87000	1710	35	0	0.5	0	29.7527	1	1.02599	2.65	1	1	0	1	0	0	0	0	FALSE	FALSE	TRUE	FALSE	TRUE	FALSE
84	103	74	29	100	100	100	0	17	35	1	34	72	83	62	21	80	0	0	0	2	86000	1780	75	0	0.45	0	27.143	0	0.980198	1.94667	3	1	1	0	0	0	0	0	TRUE	FALSE	FALSE	FALSE	FALSE	FALSE
60	70	37	33	100	100	100	0	17	34	1	33	64	71	59	12	50	0	0	0	2	80000	1800	51	0	0.49	0	24.6914	1	1.00847	2.65333	1	0	1	0	0	0	0	0	FALSE	FALSE	FALSE	TRUE	FALSE	FALSE
75	91	61	30	99	100	96	4	11	36	1	35	90	118	76	42	40	0	0	0	2	74000	1680	67	1	0.55	0	26.2188	0	1.04718	0.983333	1	0	0	0	0	1	0	0	FALSE	FALSE	FALSE	FALSE	FALSE	TRUE
64	77	59	18	99	100	98	2	12	42	1	41	87	107	74	33	30	0	0	0	2	76000	1750	57	0	0.37	0	24.8163	1	1.00294	4.53333	1	0	0	0	0	0	0	0	FALSE	FALSE	FALSE	FALSE	FALSE	TRUE
84	95	70	25	100	100	100	0	15	25	1	24	63	82	55	27	70	0	0	0	2	58000	1670	49	0	0.94	0	20.7967	1	1.00878	2.28667	2	0	0	0	0	0	0	0	FALSE	FALSE	TRUE	FALSE	FALSE	FALSE
61	91	51	40	99	100	99	1	20	36	2	34	59	66	53	13	80	0	0	0	2	63000	1620	50	0	0.42	0	24.0055	0	0.965508	3.11667	1	1	0	0	0	0	0	0	FALSE	FALSE	TRUE	FALSE	FALSE	FALSE
83	101	74	27	99	100	98	2	15	27	2	25	79	87	74	13	60	0	0	0	2	70000	1720	30	0	0.5	0	23.6614	1	1.04429	2.48333	1	0	0	0	0	0	1	0	FALSE	FALSE	FALSE	FALSE	FALSE	FALSE
80	104	68	36	99	100	97	3	25	43	2	41	73	87	62	25	100	0	0	0	2	78000	1600	78	1	0.8	0	30.4688	0	1.11037	2.61667	3	1	1	1	0	0	1	1	TRUE	FALSE	FALSE	FALSE	FALSE	FALSE
68	84	58	26	99	100	91	9	19	46	2	44	62	107	42	65	50	0	0	0	2	68000	1620	57	1	0.84	0	25.9107	0	1.16967	1.42	3	0	0	1	0	0	0	1	TRUE	FALSE	TRUE	FALSE	FALSE	TRUE
86	102	72	30	92	97	88	9	6	18	1	17	93	105	82	23	50	0	0	0	3	63000	1600	67	1	0.43	0	24.6094	1	1.08202	3.35	4	1	0	0	0	1	1	0	TRUE	TRUE	FALSE	FALSE	FALSE	TRUE
58	76	55	21	100	100	100	0	11	37	1	36	64	76	50	26	50	0	0	0	2	85000	1750	40	1	0.37	0	27.7551	1	1.00592	3.08667	1	0	0	0	0	0	1	0	FALSE	FALSE	TRUE	FALSE	FALSE	FALSE
76	90	69	21	99	100	96	4	11	28	1	27	57	68	46	22	40	0	0	0	2	65000	1670	66	1	0.5	0	23.3067	1	0.979864	3.37	2	1	0	0	0	0	1	0	FALSE	FALSE	TRUE	FALSE	FALSE	FALSE
59	79	49	30	99	100	98	2	23	68	2	66	68	96	51	45	50	0	5	0	2	62000	1850	63	0	0.75	1	18.1154	1	0.886529	5.28667	2	1	0	0	0	0	1	0	FALSE	FALSE	TRUE	TRUE	FALSE	FALSE
75	94	66	28	100	100	100	0	17	42	1	41	81	104	70	34	35	0	0	0	3	105000	1630	53	1	0.35	0	39.5197	1	1.05888	3.32	2	0	0	0	0	0	0	0	FALSE	FALSE	FALSE	FALSE	FALSE	FALSE
64	77	50	27	100	100	100	0	16	36	3	33	61	72	51	21	150	0	0	0	2	63000	1620	37	0	0.95	0	24.0055	1	1.03134	3.4	1	0	0	0	0	1	1	1	FALSE	FALSE	TRUE	TRUE	FALSE	FALSE
76	87	64	23	99	100	96	4	16	31	2	29	66	78	58	20	65	0	0	0	1	69000	1700	66	1	0.57	0	23.8754	1	1.07682	2.02	3	0	0	0	0	0	1	0	TRUE	FALSE	FALSE	FALSE	FALSE	FALSE
81	93	66	27	97	100	95	5	12	46	1	45	90	107	71	36	50	0	0	0	2	70000	1750	50	0	0.53	0	22.8571	0	0.96293	2.53333	2	0	0	1	0	0	0	0	FALSE	FALSE	FALSE	FALSE	FALSE	TRUE
74	89	52	37	100	100	100	0	12	19	1	18	88	105	76	29	50	0	0	0	2	72500	1610	46	0	0.48	0	27.9696	1	0.998498	2.78333	3	0	0	0	0	0	1	0	TRUE	FALSE	FALSE	FALSE	FALSE	TRUE
83	96	76	20	99	100	96	4	15	26	2	24	90	104	68	36	50	0	0	0	2	58000	1670	78	1	0.77	0	20.7967	1	0.957297	2.95333	1	0	0	0	0	0	1	0	FALSE	FALSE	FALSE	FALSE	FALSE	FALSE
74	88	44	44	99	100	99	1	14	34	1	33	78	89	64	25	50	0	3	0	2	58000	1720	52	0	0.48	1	19.6052	1	0.815651	1.66333	2	0	0	0	0	0	0	0	FALSE	FALSE	FALSE	TRUE	FALSE	FALSE
84	93	75	18	99	100	97	3	14	35	1	34	49	83	28	55	50	0	5	0	3	60000	1580	56	0	0.49	1	24.0346	1	0.565406	3.20333	1	0	0	0	0	1	0	0	FALSE	FALSE	TRUE	FALSE	FALSE	FALSE
64	88	57	31	97	100	86	14	11	30	2	28	55	83	47	36	50	0	0	0	4	95000	1590	63	1	0.52	0	37.5776	1	1.03652	1.15333	NA	NA	NA	NA	NA	NA	1	1	NA	TRUE	TRUE	FALSE	FALSE	FALSE
75	85	69	16	99	100	98	2	10	19	1	18	74	98	62	36	50	0	0	0	2	90000	1700	66	0	0.49	0	31.1419	1	0.971618	1.73667	NA	NA	NA	NA	NA	NA	1	0	NA	FALSE	FALSE	FALSE	FALSE	FALSE
68	84	55	29	99	100	97	3	10	19	1	18	78	86	74	12	50	0	0	0	2	70000	1620	56	0	0.33	0	26.6728	1	1.00446	1.36333	2	0	0	0	0	0	1	0	FALSE	FALSE	FALSE	FALSE	FALSE	FALSE
84	96	69	27	99	100	93	7	8	20	1	19	85	96	76	20	50	0	0	0	2	91500	1810	39	1	0.4	0	27.9296	0	1.1811	1.38333	3	0	0	0	0	0	1	0	TRUE	FALSE	FALSE	FALSE	FALSE	FALSE
74	84	66	18	99	100	89	11	12	29	2	27	57	72	46	26	50	0	0	0.5	2	62000	1620	64	1	0.72	2	23.6244	1	0.465066	4.23667	1	0	0	1	0	1	1	0	FALSE	TRUE	TRUE	FALSE	FALSE	FALSE
62	74	56	18	99	100	99	1	16	42	2	40	73	97	60	37	50	0	0	0	2	75000	1770	67	0	0.53	0	23.9395	0	0.961145	3.4	1	1	0	0	0	0	1	0	FALSE	FALSE	FALSE	FALSE	FALSE	FALSE
74	109	58	51	99	100	98	2	21	59	1	58	60	74	52	22	50	0	0	0	3	57000	1630	30	1	0.55	0	21.4536	0	1.08702	2.18333	2	0	0	0	0	0	0	0	FALSE	FALSE	TRUE	FALSE	FALSE	FALSE
76	94	59	35	100	100	100	0	18	45	1	44	85	116	74	42	150	0	0	0	3	101000	1780	53	0	0.93	0	31.8773	0	0.998681	3.93	2	0	0	0	0	0	0	0	FALSE	FALSE	FALSE	FALSE	FALSE	TRUE
78	91	69	22	99	100	96	4	16	42	2	40	70	103	55	48	50	0	0	0	3	80000	1640	72	0	0.73	0	29.7442	1	0.919497	1.63	NA	NA	NA	NA	NA	NA	0	0	NA	FALSE	TRUE	FALSE	FALSE	FALSE
81	93	61	32	99	100	98	2	22	32	1	31	83	99	74	25	50	0	0	0	2	69000	1690	75	0	0.29	0	24.1588	1	0.957537	2.97	1	1	0	0	0	0	0	0	FALSE	FALSE	FALSE	FALSE	FALSE	FALSE
74	97	61	36	99	100	98	2	17	36	1	35	65	79	55	24	50	0	0	0	2	85000	1630	42	0	0.37	0	31.9922	1	1.0126	2.57	2	1	0	0	0	0	0	1	FALSE	FALSE	TRUE	FALSE	FALSE	FALSE
56	66	42	24	99	100	98	2	16	21	2	19	78	86	67	19	50	0	0	0	2	48000	1550	57	0	0.47	0	19.9792	1	0.994249	2.61667	2	0	0	0	0	1	0	0	FALSE	FALSE	FALSE	TRUE	FALSE	FALSE
90	110	77	33	99	100	97	3	19	34	1	33	114	150	91	59	100	0	0	0	2	104000	1690	66	1	0.74	0	36.4133	1	0.990607	2.03667	2	0	0	1	0	0	1	1	FALSE	FALSE	FALSE	FALSE	FALSE	TRUE
85	120	56	64	99	100	90	10	17	33	2	31	86	109	61	48	100	0	0	0	2	70000	1650	81	0	1.35	0	25.7117	0	0.963369	2.45333	1	0	0	0	0	NA	1	1	FALSE	TRUE	FALSE	FALSE	TRUE	TRUE
77	106	71	35	95	98	94	4	15	29	2	27	54	102	25	77	106	0	0	0.5	2	86000	1750	50	1	0.84	2	28.0816	0	0.887043	1.60333	1	1	0	0	1	1	1	1	FALSE	FALSE	TRUE	FALSE	FALSE	FALSE
79	93	49	44	99	100	96	4	14	34	2	32	63	79	47	32	50	0	0	0	2	48000	1650	82	0	0.75	0	17.6309	1	0.929577	0.116667	3	0	0	0	0	0	1	1	TRUE	FALSE	TRUE	TRUE	FALSE	FALSE
69	89	52	37	100	100	100	0	11	40	1	39	81	91	72	19	50	0	0	0	2	77000	1630	66	0	0.37	0	28.9811	1	0.984502	2.16667	1	0	0	0	0	0	0	0	FALSE	FALSE	FALSE	FALSE	FALSE	FALSE
77	94	64	30	99	100	92	8	10	29	1	28	76	108	60	48	30	0	0	0	2	83000	1760	80	1	0.75	0	26.7949	0	1.02025	2.81333	1	1	0	0	0	0	0	0	FALSE	FALSE	FALSE	FALSE	FALSE	TRUE
75	84	67	17	99	100	96	4	21	43	1	42	71	86	31	55	30	0	0	0	2	58000	1690	73	1	0.65	0	20.3074	1	0.964465	2.53333	2	1	0	0	0	0	0	0	FALSE	FALSE	TRUE	FALSE	FALSE	FALSE
97	120	85	35	99	100	84	16	14	25	1	24	91	139	66	73	50	0	0	0	2	92000	1750	54	0	0.57	0	30.0408	1	1.00529	2.68333	1	0	0	0	0	0	0	0	FALSE	TRUE	FALSE	FALSE	TRUE	TRUE
70	98	60	38	99	100	98	2	16	41	2	39	66	79	58	21	100	0	0	0	2	71000	1500	26	1	0.63	0	31.5556	1	1.00047	2.01333	1	0	0	0	0	0	0	0	FALSE	FALSE	FALSE	FALSE	FALSE	FALSE
80	92	60	32	96	100	92	8	19	51	1	50	80	110	68	42	100	0	0	0	2	63000	1620	44	1	1.41	0	24.0055	0	1.09099	4.46333	2	1	0	0	0	0	1	0	FALSE	FALSE	FALSE	FALSE	FALSE	TRUE
65	104	55	49	99	100	98	2	14	29	2	27	73	89	59	30	50	0	0	0	2	72000	1800	43	1	0.38	0	22.2222	1	1.00792	3.46667	2	1	0	0	0	0	0	0	FALSE	FALSE	FALSE	FALSE	FALSE	FALSE
65	82	60	22	99	100	88	12	16	27	1	26	52	71	45	26	50	0	0	0	2	85000	1630	78	0	0.5	0	31.9922	0	1.02613	3.13	3	0	0	0	1	1	0	0	TRUE	TRUE	TRUE	FALSE	FALSE	FALSE
79	101	65	36	99	100	96	4	13	44	1	43	86	119	67	52	45	15	0	0	3	103000	1900	51	0	0.72	3	28.5319	0	0.893606	3.57	1	0	0	1	0	0	0	0	FALSE	FALSE	FALSE	FALSE	FALSE	TRUE
68	75	64	11	100	100	100	0	16	26	1	25	84	92	78	14	40	0	0	0	1	92000	1940	56	0	0.35	0	24.4447	0	0.985934	2.75	1	0	0	0	0	0	0	0	FALSE	FALSE	FALSE	FALSE	FALSE	FALSE
76	101	60	41	99	100	97	3	13	39	1	38	66	130	47	83	200	0	0	0.5	2	72000	1690	62	0	0.71	2	25.2092	0	2.95781	2.49667	3	1	0	0	0	0	0	0	TRUE	FALSE	TRUE	FALSE	FALSE	TRUE
82	98	74	24	100	100	100	0	14	20	1	19	63	83	58	25	52	0	0	0	2	90000	1750	18	1	0.49	0	29.3878	0	1.0944	2.75333	1	0	0	1	0	0	0	0	FALSE	FALSE	FALSE	FALSE	FALSE	FALSE
74	89	54	35	99	100	98	2	21	36	1	35	54	69	47	22	100	0	0	0	2	107000	1710	18	1	0.57	0	36.5925	1	0.99088	2	2	0	0	0	0	1	0	0	FALSE	FALSE	TRUE	FALSE	FALSE	FALSE
82	128	61	67	97	99	97	2	19	37	2	35	56	71	48	23	30	0	0	0	2	69000	1580	64	1	0.64	0	27.6398	1	0.991217	4.32	2	0	0	0	0	0	1	1	FALSE	FALSE	TRUE	FALSE	TRUE	FALSE
91	95	88	7	96	98	94	4	21	37	2	35	63	93	46	47	25	0	0	0	2	60000	1720	62	1	0.32	0	20.2812	0	1.11999	2.05	3	0	0	1	0	NA	0	0	TRUE	FALSE	TRUE	FALSE	FALSE	FALSE
83	97	60	37	100	100	100	0	15	26	2	24	98	121	83	38	40	0	0	0	2	56000	1670	55	0	0.5	0	20.0796	1	0.964342	2.87	3	0	0	1	0	0	0	0	TRUE	FALSE	FALSE	FALSE	FALSE	TRUE
84	121	74	47	98	100	88	12	7	24	1	23	81	101	74	27	50	0	5	0	2	82000	1720	71	0	0.28	1	27.7177	1	0.514972	2.41667	2	1	0	0	1	0	1	0	FALSE	TRUE	FALSE	FALSE	TRUE	FALSE
80	87	75	12	98	100	91	9	11	31	1	30	87	95	78	17	50	0	5	0	2	89000	1790	75	0	0.32	1	27.7769	0	1.00774	1.91667	2	0	0	0	0	0	1	0	FALSE	FALSE	FALSE	FALSE	FALSE	FALSE
67	77	61	16	100	100	100	0	16	28	1	27	72	77	66	11	40	0	5	0	2	63000	1680	40	0	0.39	1	22.3214	1	0.91857	1.53667	4	0	0	0	0	1	1	0	TRUE	FALSE	FALSE	FALSE	FALSE	FALSE
80	96	71	25	99	100	88	12	22	61	1	60	91	102	77	25	60	0	0	0	3	71000	1580	55	1	0.71	0	28.441	1	1.03279	1.68	1	1	0	0	0	0	1	0	FALSE	TRUE	FALSE	FALSE	FALSE	FALSE
84	103	67	36	98	100	95	5	19	64	1	63	84	107	69	38	50	0	0	0	1	83000	1700	48	1	0.35	0	28.7197	1	1.12055	3.78667	3	0	0	0	0	0	1	0	TRUE	FALSE	FALSE	FALSE	FALSE	TRUE
56	65	51	14	96	99	94	5	14	25	1	24	80	100	68	32	50	0	0	0	2	90000	1700	70	1	0.39	0	31.1419	0	1.05507	1.83667	1	1	0	0	0	0	1	0	FALSE	FALSE	FALSE	FALSE	FALSE	FALSE
87	107	71	36	99	100	91	9	16	73	1	72	100	133	75	58	50	0	0	0	3	77000	1750	70	1	0.39	0	25.1429	0	1.06701	2.27	1	1	1	0	0	0	1	0	FALSE	FALSE	FALSE	FALSE	FALSE	TRUE
69	99	28	71	100	100	100	0	12	32	1	31	72	80	58	22	30	0	3	0	2	72000	1640	59	0	0.35	1	26.7698	1	0.839566	1.68	2	1	0	0	0	0	0	0	FALSE	FALSE	FALSE	TRUE	FALSE	FALSE
63	76	57	19	100	100	100	0	11	31	1	30	81	104	65	39	30	0	3	0	3	80000	1650	78	0	0.43	1	29.3848	1	0.596202	2.08	2	0	0	0	0	0	0	0	FALSE	FALSE	FALSE	FALSE	FALSE	FALSE
64	74	51	23	98	100	95	5	15	26	2	24	76	90	63	27	30	0	3	0	2	78000	1680	49	0	0.32	1	27.6361	1	0.827385	1.67	1	1	0	0	0	0	0	0	FALSE	FALSE	FALSE	FALSE	FALSE	FALSE
71	86	64	22	100	100	100	0	18	38	1	37	73	81	64	17	45	0	0	0	3	90000	1800	36	1	0.54	0	27.7778	1	1.05214	5.12	1	0	0	0	0	1	0	0	FALSE	FALSE	FALSE	FALSE	FALSE	FALSE
80	95	58	37	98	100	93	7	13	26	1	25	70	80	60	20	50	0	0	0	2	70000	1860	48	0	0.5	0	20.2336	0	0.93871	1.44667	3	0	0	0	0	1	1	0	TRUE	FALSE	FALSE	FALSE	FALSE	FALSE
59	69	54	15	99	100	96	4	11	22	1	21	76	92	61	31	100	0	0	0	2	101000	1780	61	0	0.47	0	31.8773	0	0.963702	1.03667	NA	NA	NA	NA	NA	NA	1	0	NA	FALSE	FALSE	FALSE	FALSE	FALSE
62	69	59	10	99	100	97	3	15	23	2	21	60	66	58	8	50	0	0	0	2	82000	1700	73	0	0.32	0	28.3737	0	0.975428	1.55	NA	0	0	1	0	0	1	0	NA	FALSE	FALSE	FALSE	FALSE	FALSE
69	80	63	17	100	100	100	0	15	30	2	28	103	110	94	16	50	0	0	0	2	82000	1720	66	0	0.47	0	27.7177	1	0.982866	2.48667	1	0	0	0	0	0	1	0	FALSE	FALSE	FALSE	FALSE	FALSE	TRUE
93	113	83	30	99	100	93	7	13	30	2	28	116	136	99	37	50	0	0	0	2	80000	1600	75	0	0.47	0	31.25	1	0.970402	1.93667	1	0	0	0	0	0	1	0	FALSE	FALSE	FALSE	FALSE	FALSE	TRUE
58	77	50	27	99	100	99	1	10	26	1	25	62	71	56	15	50	30	0	0	2	73000	1710	46	1	0.56	3	24.9649	0	0.561279	2.51333	NA	0	0	0	0	NA	1	0	NA	FALSE	FALSE	TRUE	FALSE	FALSE
68	99	59	40	100	100	100	0	12	30	2	28	78	88	72	16	50	0	0	0	3	105000	1780	59	0	0.4	0	33.1398	0	0.988263	1.55	1	0	0	1	0	0	1	0	FALSE	FALSE	FALSE	FALSE	FALSE	FALSE
71	100	59	41	99	100	98	2	10	31	4	27	60	92	35	57	65	0	0	0	3	75000	1670	64	0	0.79	0	26.8923	1	0.929703	4.37	NA	NA	NA	NA	NA	NA	1	1	NA	FALSE	TRUE	FALSE	FALSE	FALSE
107	117	91	26	98	100	92	8	25	39	2	37	91	104	84	20	90	0	0	0	2	94000	1730	63	0	0.9	0	31.4077	0	0.984361	2.2	2	1	1	0	0	1	1	1	FALSE	FALSE	FALSE	FALSE	FALSE	FALSE
61	93	55	38	99	100	97	3	20	36	2	34	58	80	43	37	50	0	0	0	2	65000	1560	89	0	0.32	0	26.7094	1	0.941751	2.33333	1	1	0	0	0	0	1	0	FALSE	FALSE	TRUE	FALSE	FALSE	FALSE
62	74	60	14	99	100	99	1	17	28	1	27	58	77	46	31	40	0	0	0	2	66000	1580	76	1	0.42	0	26.4381	1	0.9728	1.9	1	1	1	0	0	0	0	0	FALSE	FALSE	TRUE	FALSE	FALSE	FALSE
90	99	84	15	100	100	100	0	18	25	2	23	68	85	50	35	10	0	0	0	2	68000	1540	69	0	0.2	0	28.6726	1	0.976219	4.03333	2	0	0	0	0	0	0	0	FALSE	FALSE	TRUE	FALSE	FALSE	FALSE
66	73	58	15	99	100	99	1	17	25	2	23	61	104	44	60	25	0	0	0	2	109000	1870	70	0	0.37	0	31.1705	0	0.980396	3.06667	1	0	0	1	0	0	0	0	FALSE	FALSE	TRUE	FALSE	FALSE	FALSE
73	127	62	65	100	100	100	0	11	25	2	23	59	71	54	17	40	0	0	0	2	58000	1640	38	0	0.61	0	21.5645	1	1.03004	2.99667	1	0	0	0	0	1	0	0	FALSE	FALSE	TRUE	FALSE	TRUE	FALSE
62	70	55	15	99	100	97	3	13	47	1	46	62	96	43	53	48	0	0	0	2	86000	1630	68	1	1.07	0	32.3685	0	1.15695	3.8	3	1	1	0	0	0	0	0	TRUE	FALSE	TRUE	FALSE	FALSE	FALSE
62	80	46	34	100	100	100	0	18	52	1	51	69	77	64	13	70	0	0	0	2	74000	1830	63	0	0.81	0	22.0968	0	0.951431	4.39667	3	0	0	0	0	0	0	0	TRUE	FALSE	FALSE	TRUE	FALSE	FALSE
72	90	48	42	100	100	100	0	15	35	2	33	75	116	25	91	50	0	0	0	3	49000	1610	55	1	0.77	0	18.9036	1	1.02295	2.42	2	0	0	1	0	1	1	0	FALSE	FALSE	TRUE	TRUE	FALSE	TRUE
63	84	54	30	96	100	86	14	14	26	1	25	72	108	55	53	30	0	0	0	2	79000	1600	74	1	0.55	0	30.8594	1	0.928539	1.86333	1	1	0	1	1	0	0	0	FALSE	TRUE	TRUE	FALSE	FALSE	TRUE
81	111	70	41	96	100	83	17	12	34	1	33	84	94	78	16	75	0	0	0	3	115000	1640	73	0	1.44	0	42.7573	0	1.10263	3.87	1	1	0	0	1	0	0	1	FALSE	TRUE	FALSE	FALSE	FALSE	FALSE
87	113	64	49	97	99	94	5	9	22	1	21	66	71	62	9	40	0	0	0	4	71000	1670	45	0	0.53	0	25.4581	0	0.982817	3.73	2	0	0	1	0	1	0	0	FALSE	FALSE	FALSE	FALSE	FALSE	FALSE
65	83	60	23	99	100	98	2	16	25	1	24	75	78	73	5	29	0	0	0	2	64000	1660	60	0	0.19	0	23.2254	1	0.993777	1.87	2	1	0	0	0	0	0	0	FALSE	FALSE	FALSE	FALSE	FALSE	FALSE
89	96	79	17	98	99	98	1	22	31	2	29	56	58	54	4	50	0	3	0	2	75000	1620	57	0	0.38	1	28.578	0	1.01531	3.21333	3	1	0	0	0	1	0	0	TRUE	FALSE	TRUE	FALSE	FALSE	FALSE
71	82	65	17	100	100	100	0	12	65	6	59	68	76	61	15	30	0	5	0	2	71000	1600	31	0	0.25	1	27.7344	0	0.997583	2.97	1	0	0	0	0	0	0	0	FALSE	FALSE	FALSE	FALSE	FALSE	FALSE
61	80	53	27	99	100	99	1	10	27	1	26	43	61	37	24	30	0	5	0	2	70000	1640	54	0	0.37	1	26.0262	0	1.12037	3.01667	2	0	0	0	0	0	0	0	FALSE	FALSE	TRUE	FALSE	FALSE	FALSE
65	75	53	22	99	100	99	1	9	47	1	46	76	82	68	14	50	0	5	0	2	74000	1800	48	0	0.47	1	22.8395	0	1.17228	2.60333	1	0	0	1	0	0	0	0	FALSE	FALSE	FALSE	FALSE	FALSE	FALSE
109	125	95	30	98	99	97	2	9	27	1	26	70	78	64	14	50	0	5	0	2	60000	1600	46	0	0.45	1	23.4375	0	1.15424	1.31333	2	0	0	0	0	1	0	0	FALSE	FALSE	FALSE	FALSE	TRUE	FALSE
93	115	70	45	100	100	100	0	17	30	2	28	64	83	56	27	60	0	0	0	2	51000	1580	31	0	0.8	0	20.4294	1	1.04465	3.39667	1	0	0	0	0	0	0	0	FALSE	FALSE	FALSE	FALSE	FALSE	FALSE
71	78	60	18	100	100	100	0	16	31	1	30	59	70	51	19	90	0	0	0	2	82000	1820	46	0	0.87	0	24.7555	0	0.96993	3.55	1	0	0	0	0	1	0	0	FALSE	FALSE	TRUE	FALSE	FALSE	FALSE
124	186	81	105	96	100	92	8	23	30	1	29	87	105	71	34	47	0	0	0	2	62000	1670	62	1	0.42	0	22.231	1	0.982123	1.21667	1	1	0	1	0	0	0	0	FALSE	FALSE	FALSE	FALSE	TRUE	TRUE
73	93	56	37	96	97	95	2	22	35	1	34	70	78	64	14	30	0	0	0	2	78000	1750	61	0	0.3	0	25.4694	0	0.96591	1.63333	2	1	0	0	0	0	0	0	FALSE	FALSE	FALSE	FALSE	FALSE	FALSE
82	114	55	59	100	100	100	0	14	28	1	27	75	91	58	33	60	0	0	0	2	75000	1640	30	0	0.76	0	27.8852	1	1.03608	2.76333	1	0	0	0	0	0	0	0	FALSE	FALSE	FALSE	FALSE	FALSE	FALSE
72	79	68	11	100	100	100	0	17	27	1	26	65	67	63	4	80	0	0	0	3	115000	1750	42	0	0.67	0	37.551	0	0.906512	2.93333	3	0	0	0	0	1	1	1	TRUE	FALSE	FALSE	FALSE	FALSE	FALSE
67	81	61	20	100	100	100	0	17	33	5	28	80	98	71	27	30	0	0	0	2	63000	1600	57	0	0.38	0	24.6094	0	0.96437	2.14667	1	0	0	0	0	0	0	0	FALSE	FALSE	FALSE	FALSE	FALSE	FALSE
62	67	58	9	99	100	96	4	10	64	3	61	58	72	47	25	40	0	0	0	3	85000	1750	46	1	0.45	0	27.7551	1	1.03725	2.08333	1	0	0	1	0	0	0	1	FALSE	FALSE	TRUE	FALSE	FALSE	FALSE
72	94	55	39	99	100	98	2	10	29	1	28	57	89	36	53	45	0	0	0	1	60000	1490	75	1	0.61	0	27.0258	1	0.955748	3.89667	1	0	0	0	0	0	1	0	FALSE	FALSE	TRUE	FALSE	FALSE	FALSE
84	100	63	37	99	100	99	1	11	30	1	29	55	102	45	57	47	0	0	0.5	2	90000	1830	67	1	0.72	2	26.8745	0	0.326129	2.62	1	0	0	0	0	0	0	1	FALSE	FALSE	TRUE	FALSE	FALSE	FALSE
68	90	64	26	99	100	98	2	19	25	1	24	77	107	66	41	27	0	0	0	2	66000	1720	63	1	0.53	0	22.3094	0	1.04254	1.83333	1	0	0	1	0	1	0	0	FALSE	FALSE	FALSE	FALSE	FALSE	TRUE
78	86	71	15	98	99	98	1	16	27	1	26	71	93	57	36	40	0	0	0	2	51500	1650	79	0	0.41	0	18.9164	1	0.943705	2.39667	1	1	0	0	0	0	0	0	FALSE	FALSE	FALSE	FALSE	FALSE	FALSE
68	76	62	14	97	99	94	5	20	35	1	34	88	99	82	17	30	0	0	0	2	91000	1770	60	1	0.33	0	29.0466	0	1.1778	1.41333	3	1	0	0	0	0	0	0	TRUE	FALSE	FALSE	FALSE	FALSE	FALSE
62	74	47	27	99	100	96	4	17	27	1	26	76	105	64	41	10	0	0	0	2	57000	1600	65	0	0.57	0	22.2656	1	0.979551	3.52	2	0	0	0	0	1	0	0	FALSE	FALSE	FALSE	TRUE	FALSE	TRUE
74	80	64	16	100	100	100	0	14	23	2	21	57	83	48	35	50	0	0	0	2	78000	1780	49	0	0.4	0	24.6181	0	0.96736	2.20333	1	0	0	0	0	0	0	1	FALSE	FALSE	TRUE	FALSE	FALSE	FALSE
59	71	55	16	99	100	98	2	15	87	1	86	56	78	44	34	20	0	0	0	2	65000	1700	74	0	0.4	0	22.4913	1	0.942634	1.09667	NA	NA	NA	NA	NA	NA	0	0	NA	FALSE	TRUE	FALSE	FALSE	FALSE
55	66	47	19	99	100	99	1	13	20	1	19	68	76	61	15	40	0	0	0	2	115000	1780	44	0	0.4	0	36.2959	0	1.00635	2.3	2	0	0	0	0	0	0	0	FALSE	FALSE	FALSE	TRUE	FALSE	FALSE
81	97	53	44	100	100	100	0	18	30	2	28	49	58	45	13	40	0	0	0	2	75000	1680	67	0	0.52	0	26.5731	0	0.967885	2.73667	1	1	0	0	0	0	0	0	FALSE	FALSE	TRUE	FALSE	FALSE	FALSE
73	80	62	18	99	100	96	4	26	36	1	35	94	109	81	28	40	0	0	0	2	55000	1630	62	0	0.45	0	20.7008	1	0.986071	1.62	2	1	0	0	0	1	0	0	FALSE	FALSE	FALSE	FALSE	FALSE	TRUE
57	70	32	38	99	100	94	6	12	22	1	21	92	106	75	31	50	0	0	0	2	92000	1680	74	0	0.38	0	32.5964	0	0.981152	2.93333	1	0	0	0	0	0	1	0	FALSE	FALSE	FALSE	TRUE	FALSE	TRUE
56	62	52	10	100	100	100	0	9	20	1	19	63	73	58	15	50	0	10	0	2	73000	1700	67	0	0.35	1	25.2595	0	0.979031	2.61667	3	0	0	0	0	0	0	0	TRUE	FALSE	FALSE	FALSE	FALSE	FALSE
80	91	70	21	99	100	98	2	15	33	1	32	66	80	55	25	50	0	0	0.5	2	70000	1750	27	1	0.5	2	22.8571	1	0.449482	1.47	1	0	0	0	0	1	0	0	FALSE	FALSE	TRUE	FALSE	FALSE	FALSE
74	88	70	18	99	100	97	3	22	36	1	35	52	66	40	26	40	0	5	0	2	108000	1650	80	0	0.43	1	39.6694	0	1.42911	1.73333	NA	NA	NA	NA	NA	NA	0	0	NA	FALSE	TRUE	FALSE	FALSE	FALSE
62	124	60	64	97	100	91	9	21	38	1	37	58	70	49	21	30	0	3	0	2	77000	1720	71	0	0.4	1	26.0276	0	0.919286	2.51333	3	1	1	1	0	NA	1	0	TRUE	FALSE	TRUE	FALSE	TRUE	FALSE
83	110	69	41	93	97	86	11	12	40	1	39	93	114	77	37	40	0	0	0.5	2	79000	1690	60	1	0.39	2	27.6601	0	0.246407	1.52	4	1	0	0	0	0	1	0	TRUE	TRUE	FALSE	FALSE	FALSE	TRUE
81	125	62	63	100	100	100	0	14	34	1	33	71	88	63	25	40	0	0	0	2	89000	1750	29	1	0.53	0	29.0612	1	1.01035	2.15	NA	0	0	0	0	0	1	0	NA	FALSE	FALSE	FALSE	TRUE	FALSE
71	85	64	21	99	100	99	1	17	37	2	35	56	75	43	32	50	0	0	0	2	63000	1680	37	0	0.37	0	22.3214	1	1.03175	1.98667	1	0	0	0	0	0	0	0	FALSE	FALSE	TRUE	FALSE	FALSE	FALSE
63	87	28	59	99	100	93	7	10	24	1	23	67	101	50	51	50	0	0	0	2	80000	1570	84	0	0.5	0	32.4557	1	0.964324	2.96667	3	1	0	0	0	0	0	1	TRUE	FALSE	TRUE	TRUE	FALSE	FALSE
67	104	59	45	100	100	100	0	10	21	1	20	75	101	65	36	50	0	0	0	2	62000	1620	73	1	0.6	0	23.6244	0	1.03019	1.87	1	0	0	0	0	0	0	1	FALSE	FALSE	FALSE	FALSE	FALSE	FALSE
85	108	70	38	99	100	95	5	17	30	1	29	77	83	72	11	50	0	0	0	2	85000	1600	68	0	0.44	0	33.2031	1	0.981155	2.45333	3	1	0	0	0	0	0	0	TRUE	FALSE	FALSE	FALSE	FALSE	FALSE
75	88	69	19	99	100	99	1	13	21	1	20	65	77	58	19	35	0	0	0	2	69000	1690	54	1	0.35	0	24.1588	1	0.996745	2.39667	1	0	0	0	0	0	0	0	FALSE	FALSE	FALSE	FALSE	FALSE	FALSE
60	68	55	13	100	100	100	0	10	43	1	42	87	95	83	12	50	0	0	0	2	95000	1980	58	0	0.39	0	24.2322	0	0.963264	2.45333	1	0	0	0	0	0	1	0	FALSE	FALSE	FALSE	FALSE	FALSE	FALSE
79	94	63	31	99	100	97	3	13	44	2	42	74	82	69	13	38	0	0	0	2	49000	1660	53	1	0.62	0	17.782	0	1.06046	2.13667	1	0	0	0	0	0	1	0	FALSE	FALSE	FALSE	FALSE	FALSE	FALSE
59	69	51	18	99	100	96	4	13	22	2	20	80	92	71	21	30	0	0	0	2	69000	1680	78	1	0.5	0	24.4473	1	0.966409	1.75	2	1	0	1	0	0	1	0	FALSE	FALSE	FALSE	FALSE	FALSE	FALSE
79	90	73	17	97	100	89	11	16	32	2	30	81	88	73	15	40	0	0	0	2	90000	1820	78	1	0.87	0	27.1706	1	0.971295	2.46667	1	0	1	0	0	0	1	0	FALSE	TRUE	FALSE	FALSE	FALSE	FALSE
87	99	78	21	99	100	96	4	12	24	2	22	74	101	66	35	75	0	0	0	2	96000	1790	59	1	0.72	0	29.9616	0	1.06575	2.28333	1	1	0	0	0	0	0	1	FALSE	FALSE	FALSE	FALSE	FALSE	FALSE
69	78	62	16	100	100	100	0	8	23	1	22	54	57	49	8	50	0	0	0	2	61000	1650	77	0	0.35	0	22.4059	1	0.951398	1.74667	1	1	0	0	0	0	0	0	FALSE	FALSE	TRUE	FALSE	FALSE	FALSE
73	96	66	30	99	100	98	2	2	8	1	7	104	108	94	14	50	0	0	0	2	46000	1560	22	1	0.49	0	18.902	1	1.15321	1.02	NA	NA	NA	NA	NA	NA	0	0	NA	FALSE	FALSE	FALSE	FALSE	TRUE
57	73	52	21	99	100	97	3	12	28	2	26	77	88	65	23	20	0	0	0	3	90000	1720	62	0	0.33	0	30.4218	1	1.12434	1.38	1	1	0	0	0	0	1	0	FALSE	FALSE	FALSE	FALSE	FALSE	FALSE
58	73	52	21	100	100	100	0	10	43	2	41	77	87	71	16	30	0	0	0	3	66000	1400	75	0	0.33	0	33.6735	0	0.963369	1.48	2	0	0	0	0	0	1	0	FALSE	FALSE	FALSE	FALSE	FALSE	FALSE
81	92	59	33	97	100	95	5	13	26	2	24	70	83	58	25	30	0	0	0	2	54000	1520	58	1	0.37	0	23.3726	1	0.990584	1.02	1	0	0	0	0	0	1	0	FALSE	FALSE	FALSE	FALSE	FALSE	FALSE
56	66	54	12	100	100	100	0	8	30	1	29	75	112	64	48	50	0	0	0	2	68000	1760	62	0	0.42	0	21.9525	1	0.987281	2.33667	2	1	0	0	0	1	0	0	FALSE	FALSE	FALSE	FALSE	FALSE	TRUE
93	108	78	30	98	100	95	5	16	40	1	39	72	96	58	38	50	0	0	0	2	67000	1690	47	1	0.43	0	23.4586	1	1.0025	2.48333	2	1	0	1	0	1	0	0	FALSE	FALSE	FALSE	FALSE	FALSE	FALSE
66	99	54	45	100	100	100	0	15	59	1	58	57	62	53	9	50	0	0	0	2	80000	1800	18	0	0.29	0	24.6914	0	1.0072	3.30333	1	0	0	0	0	1	0	0	FALSE	FALSE	TRUE	FALSE	FALSE	FALSE
67	86	60	26	99	100	90	10	12	21	1	20	74	94	62	32	50	0	0	0	2	59000	1600	55	1	0.7	0	23.0469	1	0.99229	3.21333	2	0	0	0	0	0	0	0	FALSE	TRUE	FALSE	FALSE	FALSE	FALSE
61	85	58	27	99	100	96	4	13	27	1	26	61	83	52	31	30	0	0	0	2	89000	1790	56	1	0.88	0	27.7769	0	1.06515	3.29667	2	0	0	0	0	0	0	0	FALSE	FALSE	TRUE	FALSE	FALSE	FALSE
82	90	66	24	99	100	96	4	15	28	2	26	73	96	49	47	60	0	0	0	2	109000	1900	65	0	0.55	0	30.1939	1	0.987769	3.05	1	1	0	1	0	1	0	0	FALSE	FALSE	TRUE	FALSE	FALSE	FALSE
66	85	58	27	99	100	98	2	14	34	1	33	68	83	58	25	50	0	0	0	2	74000	1740	69	0	0.55	0	24.4418	0	0.96213	2.45333	2	1	0	0	0	0	0	0	FALSE	FALSE	FALSE	FALSE	FALSE	FALSE
85	88	74	14	96	99	94	5	16	36	1	35	68	80	56	24	80	0	0	0	2	90000	1830	51	1	1.22	0	26.8745	0	1.07608	3.18333	1	0	0	0	0	NA	0	0	FALSE	FALSE	FALSE	FALSE	FALSE	FALSE
80	93	70	23	98	100	97	3	13	37	1	36	71	85	58	27	50	0	0	0	2	89000	1770	50	1	0.67	0	28.4082	1	1.2777	4.72	4	0	0	1	0	0	0	0	TRUE	FALSE	FALSE	FALSE	FALSE	FALSE
77	93	64	29	99	100	98	2	17	20	4	16	84	94	75	19	40	0	0	0	2	90000	1730	56	0	0.35	0	30.0712	1	1.00404	4.08667	1	0	0	0	0	0	0	0	FALSE	FALSE	FALSE	FALSE	FALSE	FALSE
62	84	53	31	100	100	100	0	14	37	1	36	77	100	69	31	45	0	0	0	2	77000	1570	73	0	0.54	0	31.2386	1	0.96808	3.68667	3	1	0	1	0	0	0	1	TRUE	FALSE	FALSE	FALSE	FALSE	FALSE
72	97	56	41	99	100	96	4	15	29	1	28	72	83	62	21	45	0	0	0	3	77000	1540	72	0	0.74	0	32.4675	1	0.92156	2.12	3	0	0	0	0	0	0	0	TRUE	FALSE	FALSE	FALSE	FALSE	FALSE
71	82	54	28	100	100	100	0	16	26	1	25	82	91	75	16	40	0	0	0	1	54000	1570	54	0	0.55	0	21.9076	1	0.959609	2.33667	1	0	0	0	0	0	1	0	FALSE	FALSE	FALSE	FALSE	FALSE	FALSE
92	113	81	32	97	100	95	5	12	30	1	29	75	82	70	12	40	0	0	0	2	80000	1800	52	1	0.42	0	24.6914	1	1.00046	2.00333	1	0	0	0	0	0	1	0	FALSE	FALSE	FALSE	FALSE	FALSE	FALSE
85	112	72	40	99	100	90	10	12	25	1	24	82	97	63	34	40	0	0	0.5	1	118000	1830	60	0	0.45	2	35.2355	1	0.900482	1.90333	3	1	0	0	0	0	1	0	TRUE	TRUE	FALSE	FALSE	FALSE	FALSE
67	92	26	66	99	100	96	4	18	25	1	24	75	80	71	9	30	0	0	0	2	65000	1750	71	0	0.4	0	21.2245	0	0.952271	1.04667	2	1	0	0	0	0	1	0	FALSE	FALSE	FALSE	TRUE	FALSE	FALSE
78	88	65	23	95	100	77	23	14	27	1	26	84	98	72	26	45	0	0	0	2	74000	1710	58	1	0.51	0	25.3069	0	1.05981	1.06333	2	0	0	0	0	0	1	0	FALSE	TRUE	FALSE	FALSE	FALSE	FALSE
67	74	62	12	100	100	100	0	12	28	1	27	56	76	46	30	30	0	0	0	2	85000	1830	69	0	0.7	0	25.3815	1	0.972639	3.24667	2	0	0	0	0	0	1	1	FALSE	FALSE	TRUE	FALSE	FALSE	FALSE
71	77	63	14	100	100	100	0	15	28	1	27	84	88	81	7	35	0	0	0	2	63000	1620	49	0	0.25	0	24.0055	1	0.986361	1.73	3	0	0	0	0	0	1	0	TRUE	FALSE	FALSE	FALSE	FALSE	FALSE
61	72	53	19	100	100	100	0	14	20	1	19	74	88	68	20	40	0	0	0	2	68000	1620	65	0	0.41	0	25.9107	1	0.983357	2.13	2	1	0	0	0	0	1	1	FALSE	FALSE	FALSE	FALSE	FALSE	FALSE
54	64	48	16	100	100	100	0	18	25	9	16	85	94	77	17	40	0	0	0	2	88000	1700	69	0	0.48	0	30.4498	1	0.97783	0.613333	2	1	0	0	0	0	0	0	FALSE	FALSE	FALSE	TRUE	FALSE	FALSE
77	88	66	22	100	100	100	0	17	32	2	30	57	67	47	20	10	0	0	0	2	82000	1750	52	0	0.55	0	26.7755	0	0.955794	3.11333	3	0	0	0	0	0	0	0	TRUE	FALSE	TRUE	FALSE	FALSE	FALSE
64	95	54	41	98	100	93	7	14	37	2	35	67	84	58	26	10	0	0	0	2	60000	1620	64	1	0.65	0	22.8624	1	0.9816	2.49667	1	1	0	0	0	0	0	0	FALSE	FALSE	FALSE	FALSE	FALSE	FALSE
74	87	57	30	99	100	97	3	14	66	2	64	73	99	52	47	10	0	0	0	2	63000	1730	48	1	0.99	0	21.0498	1	0.998537	3.55333	2	0	0	0	0	0	0	0	FALSE	FALSE	TRUE	FALSE	FALSE	FALSE
66	77	56	21	99	100	95	5	8	31	2	29	76	86	70	16	10	0	0	0	2	66000	1620	71	1	0.58	0	25.1486	1	0.976868	2.11667	1	0	0	0	0	0	0	0	FALSE	FALSE	FALSE	FALSE	FALSE	FALSE
91	95	85	10	99	100	98	2	16	25	2	23	62	97	48	49	50	0	0	0	2	65000	1650	52	0	0.53	0	23.8751	1	1.0078	1.51667	2	0	0	0	0	0	0	0	FALSE	FALSE	TRUE	FALSE	FALSE	FALSE
115	128	106	22	99	100	94	6	25	38	1	37	67	84	58	26	150	0	0	0	2	71000	1720	69	0	1.37	0	23.9995	0	0.940681	1.78333	NA	NA	NA	NA	NA	NA	0	1	NA	FALSE	FALSE	FALSE	TRUE	FALSE
85	99	70	29	99	100	99	1	22	37	2	35	90	110	80	30	50	0	0	0	2	73000	1690	32	1	0.97	0	25.5593	1	1.01747	2.62	1	0	0	0	0	0	0	0	FALSE	FALSE	FALSE	FALSE	FALSE	TRUE
51	72	28	44	100	100	100	0	14	22	2	20	59	72	50	22	50	0	0	0	2	73000	1770	50	0	0.6	0	23.3011	0	0.963908	3.65	2	0	0	0	0	0	0	0	FALSE	FALSE	TRUE	TRUE	FALSE	FALSE
71	80	62	18	99	100	96	4	11	47	2	45	66	96	56	40	50	0	0	0	2	90000	1680	72	1	0.61	0	31.8878	1	0.985876	2.93	1	0	0	0	0	0	1	0	FALSE	FALSE	FALSE	FALSE	FALSE	FALSE
63	77	57	20	100	100	100	0	13	20	2	18	63	67	60	7	10	0	0	0	2	63000	1710	60	0	0.32	0	21.5451	1	0.9915	2.85	1	0	0	0	0	0	1	0	FALSE	FALSE	FALSE	FALSE	FALSE	FALSE
74	106	66	40	99	100	94	6	12	46	1	45	87	123	74	49	10	0	0	0.5	2	82000	1850	59	1	0.51	2	23.9591	0	0.300004	1.89667	2	1	0	0	0	0	1	0	FALSE	FALSE	FALSE	FALSE	FALSE	TRUE
94	115	83	32	99	100	97	3	15	31	2	29	83	98	68	30	10	0	0	0	2	82000	1770	50	0	0.57	0	26.1738	0	0.952499	2.05333	3	0	0	0	0	1	1	0	TRUE	FALSE	FALSE	FALSE	FALSE	FALSE
92	104	82	22	99	100	91	9	16	26	2	24	80	93	75	18	20	0	0	0	2	99000	1750	40	0	0.4	0	32.3265	0	0.954046	1.49667	4	0	0	0	0	0	1	0	TRUE	FALSE	FALSE	FALSE	FALSE	FALSE
84	101	74	27	100	100	100	0	15	37	2	35	66	77	60	17	10	0	0	0	2	58000	1600	60	0	0.5	0	22.6562	1	0.992989	1.48667	1	0	0	0	0	0	1	0	FALSE	FALSE	FALSE	FALSE	FALSE	FALSE
64	70	54	16	99	100	99	1	12	21	2	19	67	81	61	20	50	0	0	0	2	70000	1650	76	0	0.83	0	25.7117	1	0.956775	2.18	1	0	0	0	0	0	1	1	FALSE	FALSE	FALSE	FALSE	FALSE	FALSE
63	94	50	44	100	100	100	0	21	54	4	50	91	114	73	41	50	0	0	0	1	56000	1650	74	0	0.75	0	20.5693	1	0.938424	2.9	2	1	0	0	0	0	1	1	FALSE	FALSE	FALSE	TRUE	FALSE	TRUE
79	96	66	30	97	100	93	7	13	34	1	33	71	111	53	58	50	0	0	0	2	55000	1520	72	1	0.55	0	23.8054	1	0.97323	1.93333	2	1	0	0	0	0	0	0	FALSE	FALSE	TRUE	FALSE	FALSE	TRUE
114	124	102	22	98	100	94	6	26	37	1	36	73	83	66	17	50	0	0	0	2	82000	1720	72	0	0.52	0	27.7177	0	0.97864	2.33667	3	1	0	1	0	0	1	1	TRUE	FALSE	FALSE	FALSE	TRUE	FALSE
49	69	37	32	100	100	100	0	16	27	1	26	80	97	69	28	50	0	0	0	1	75000	1770	50	0	0.5	0	23.9395	0	1.0225	1.68667	3	0	0	0	0	0	1	0	TRUE	FALSE	FALSE	TRUE	FALSE	FALSE
59	66	50	16	99	100	99	1	9	26	2	24	80	84	75	9	50	0	0	0	2	75000	1680	58	1	0.47	0	26.5731	1	0.936529	1.65	2	1	0	0	1	1	1	0	FALSE	FALSE	FALSE	TRUE	FALSE	FALSE
74	110	61	49	98	100	74	26	10	45	1	44	79	110	61	49	50	0	0	0	1	65000	1700	63	1	0.44	0	22.4913	1	0.964562	2.20333	1	0	0	0	0	0	1	0	FALSE	TRUE	FALSE	FALSE	FALSE	TRUE
71	106	48	58	99	100	99	1	23	43	2	41	80	93	65	28	50	0	0	0	2	64000	1660	16	0	0.4	0	23.2254	1	1.06652	1.91333	1	0	0	0	0	0	1	0	FALSE	FALSE	FALSE	TRUE	FALSE	FALSE
68	76	55	21	99	100	96	4	11	27	2	25	88	96	78	18	50	0	0	0	2	59000	1650	78	0	0.51	0	21.6713	0	0.949094	1.76333	2	0	0	0	0	0	1	0	FALSE	FALSE	FALSE	FALSE	FALSE	FALSE
68	82	53	29	100	100	100	0	20	34	2	32	103	114	86	28	50	0	0	0	2	64000	1720	80	0	0.34	0	21.6333	0	0.948027	1.73667	1	0	0	0	0	0	1	0	FALSE	FALSE	FALSE	FALSE	FALSE	TRUE
61	80	47	33	99	100	84	16	16	37	2	35	69	81	60	21	50	0	0	0	2	40000	1450	74	1	0.52	0	19.025	1	0.947216	1.58667	NA	1	0	1	1	0	1	0	NA	TRUE	FALSE	TRUE	FALSE	FALSE
71	103	67	36	100	100	100	0	13	43	1	42	68	103	55	48	60	0	5	0	2	82000	1750	49	0	0.71	1	26.7755	1	0.737411	2.28	3	0	0	0	1	0	0	0	TRUE	FALSE	TRUE	FALSE	FALSE	FALSE
68	80	61	19	99	100	87	13	15	70	1	69	68	89	58	31	40	0	0	0	2	108000	1830	60	1	0.73	0	32.2494	0	0.982512	2.51667	2	1	1	0	1	0	0	0	FALSE	TRUE	FALSE	FALSE	FALSE	FALSE
79	89	67	22	100	100	100	0	17	23	1	22	77	86	59	27	40	0	0	0	2	59000	1600	39	1	0.36	0	23.0469	1	1.01383	1.56333	1	0	0	0	0	0	0	0	FALSE	FALSE	FALSE	FALSE	FALSE	FALSE
98	125	81	44	98	100	91	9	18	26	2	24	71	111	61	50	60	0	0	0	2	81000	1800	39	0	0.67	0	25	1	1.02727	2.5	1	0	0	1	0	0	0	0	FALSE	FALSE	FALSE	FALSE	TRUE	TRUE
76	109	70	39	99	100	98	2	12	24	1	23	73	96	61	35	30	0	0	0	1	67000	1700	57	1	0.27	0	23.1834	1	1.08622	2.23333	3	0	0	0	0	0	0	0	TRUE	FALSE	FALSE	FALSE	FALSE	FALSE
60	82	53	29	99	100	99	1	5	20	1	19	61	80	56	24	40	0	5	0	2	73000	1680	42	0	0.41	1	25.8645	0	1.10681	1.78	1	0	0	0	0	0	0	0	FALSE	FALSE	FALSE	FALSE	FALSE	FALSE
70	76	61	15	100	100	100	0	13	22	1	21	60	76	53	23	30	0	5	0	2	66000	1630	40	0	0.38	1	24.841	1	0.764841	3.56333	1	0	0	0	0	0	0	0	FALSE	FALSE	TRUE	FALSE	FALSE	FALSE
64	102	48	54	100	100	100	0	12	25	1	24	79	92	64	28	40	0	0	0	1	59000	1640	72	0	0.25	0	21.9363	0	1.00271	4.16667	2	0	0	0	0	0	1	0	FALSE	FALSE	FALSE	TRUE	FALSE	FALSE
74	101	68	33	99	100	77	23	13	32	1	31	67	86	60	26	30	0	0	0	2	108000	1650	79	1	0.42	0	39.6694	1	0.977861	2.00333	1	1	0	0	0	0	1	0	FALSE	TRUE	FALSE	FALSE	FALSE	FALSE
69	76	65	11	99	100	96	4	11	19	1	18	62	76	55	21	50	0	5	0	2	78000	1510	72	0	0.55	1	34.209	0	0.769299	1.85	3	0	0	1	0	0	1	0	TRUE	FALSE	TRUE	FALSE	FALSE	FALSE
64	81	51	30	99	100	97	3	16	27	1	26	81	96	71	25	40	0	0	0	2	76000	1790	71	0	0.49	0	23.7196	0	0.959642	1.73667	2	0	0	0	0	NA	1	0	FALSE	FALSE	FALSE	FALSE	FALSE	FALSE
65	72	61	11	99	100	98	2	14	18	1	17	69	90	50	40	25	0	0	0	2	66000	1600	69	0	0.4	0	25.7812	1	0.957626	1.98667	3	0	0	1	0	0	0	0	TRUE	FALSE	TRUE	FALSE	FALSE	FALSE
57	65	54	11	100	100	100	0	18	22	5	17	54	80	45	35	30	0	0	0	2	87000	1810	56	0	0.41	0	26.556	0	0.959286	1.93	3	0	0	0	0	1	0	1	TRUE	FALSE	TRUE	FALSE	FALSE	FALSE
75	86	62	24	99	100	93	7	13	23	1	22	103	115	95	20	10	0	0	0	2	66000	1710	64	1	0.54	0	22.571	0	1.04147	1.63667	2	1	0	0	0	0	1	0	FALSE	FALSE	FALSE	FALSE	FALSE	TRUE
82	104	69	35	97	100	90	10	15	40	2	38	59	73	50	23	10	0	0	0	2	55000	1600	73	0	0.41	0	21.4844	0	1.01693	3.23	1	1	0	0	1	0	1	0	FALSE	TRUE	TRUE	FALSE	FALSE	FALSE
84	93	69	24	99	100	97	3	12	18	1	17	101	140	67	73	45	0	0	0	2	59000	1600	58	1	0.41	0	23.0469	1	0.989653	2.24667	1	0	0	1	0	0	1	1	FALSE	FALSE	FALSE	FALSE	FALSE	TRUE
67	77	63	14	100	100	100	0	12	23	1	22	90	95	86	9	40	0	0	0	2	86000	1930	53	0	0.45	0	23.0879	0	0.948141	4.03	3	0	0	0	0	0	1	0	TRUE	FALSE	FALSE	FALSE	FALSE	FALSE
70	81	61	20	100	100	100	0	16	21	2	19	55	66	50	16	50	0	0	0	3	84000	1550	70	0	0.56	0	34.9636	0	0.974409	3.48	2	0	0	0	0	0	1	1	FALSE	FALSE	TRUE	FALSE	FALSE	FALSE
71	89	62	27	97	100	94	6	24	47	1	46	65	86	47	39	60	0	0	0	2	109000	1680	50	1	0.58	0	38.6196	1	0.990522	3.75	2	1	0	1	0	0	0	0	FALSE	FALSE	TRUE	FALSE	FALSE	FALSE
100	115	77	38	99	100	95	5	20	45	1	44	87	113	67	46	120	0	0	0	2	100000	1680	58	1	0.82	0	35.4308	1	1.23739	3.05	3	1	0	0	0	0	0	1	TRUE	FALSE	FALSE	FALSE	FALSE	TRUE
99	128	84	44	99	100	97	3	23	59	1	58	81	139	55	84	150	0	0	0	2	78000	1730	70	1	1.15	0	26.0617	0	1.04127	2.78	2	0	0	0	0	1	0	1	FALSE	FALSE	TRUE	FALSE	TRUE	TRUE
76	97	71	26	100	100	100	0	10	23	1	22	70	81	60	21	10	0	0	0	2	85000	1780	63	0	0.53	0	26.8274	0	0.969285	2.98	2	1	0	0	0	0	0	0	FALSE	FALSE	FALSE	FALSE	FALSE	FALSE
49	61	45	16	100	100	100	0	15	23	1	22	61	76	49	27	10	0	0	0	2	60000	1600	65	0	0.45	0	23.4375	1	0.960968	2.71333	3	1	0	0	0	0	1	1	TRUE	FALSE	TRUE	TRUE	FALSE	FALSE
63	69	57	12	99	100	99	1	14	21	1	20	87	102	73	29	10	0	0	0	2	90000	1760	60	0	0.35	0	29.0548	0	0.976427	2.36333	1	0	0	0	0	0	1	1	FALSE	FALSE	FALSE	FALSE	FALSE	FALSE
82	108	69	39	100	100	100	0	15	28	1	27	88	101	77	24	10	0	0	0	2	76000	1750	49	0	0.3	0	24.8163	0	0.967833	1.92	1	0	0	0	0	0	0	0	FALSE	FALSE	FALSE	FALSE	FALSE	FALSE
78	87	74	13	98	100	92	8	14	27	1	26	62	82	55	27	10	0	0	0	2	90000	1800	50	0	0.3	0	27.7778	0	0.97544	1.54667	1	0	0	0	0	1	0	1	FALSE	FALSE	TRUE	FALSE	FALSE	FALSE
69	88	62	26	100	100	100	0	18	23	2	21	66	83	55	28	10	0	0	0	2	78000	1750	63	0	0.25	0	25.4694	0	0.965627	1.83	2	0	0	1	0	0	0	0	FALSE	FALSE	TRUE	FALSE	FALSE	FALSE
77	87	69	18	100	100	99	1	23	32	1	31	73	89	61	28	80	0	0	0	2	64000	1720	81	0	0.82	0	21.6333	0	0.963715	4.18667	3	0	1	0	0	0	1	0	TRUE	FALSE	FALSE	FALSE	FALSE	FALSE
82	92	65	27	99	100	97	3	13	36	1	35	71	85	62	23	50	0	0	0	2	62000	1850	34	1	0.6	0	18.1154	0	1.09834	2.92	NA	0	0	1	0	0	0	0	NA	FALSE	FALSE	FALSE	FALSE	FALSE
70	91	62	29	99	100	99	1	11	19	1	18	70	85	62	23	40	0	0	0	2	74000	1710	56	1	0.52	0	25.3069	0	1.06418	2.31667	1	0	0	0	0	0	1	1	FALSE	FALSE	FALSE	FALSE	FALSE	FALSE
70	87	63	24	99	100	94	6	14	35	1	34	75	90	65	25	30	0	3	0	2	118000	1800	80	0	0.37	1	36.4198	0	0.975275	1.68667	2	1	0	0	0	0	1	0	FALSE	FALSE	FALSE	FALSE	FALSE	FALSE
74	86	63	23	94	98	93	5	17	27	1	26	68	91	56	35	40	0	0	0	3	73000	1720	86	1	0.43	0	24.6755	0	0.983823	1.14667	4	1	0	0	1	0	0	0	TRUE	FALSE	FALSE	FALSE	FALSE	FALSE
67	77	59	18	98	99	97	2	12	41	2	39	89	93	83	10	90	0	0	0	2	97000	1730	72	0	0.52	0	32.41	0	0.981776	2.98333	2	1	0	1	0	0	1	1	FALSE	FALSE	FALSE	FALSE	FALSE	FALSE
65	81	60	21	100	100	100	0	17	24	2	22	70	94	53	41	50	0	0	0	1	58000	1680	48	0	0.56	0	20.5499	1	0.970323	3.04667	1	0	0	0	0	1	0	0	FALSE	FALSE	TRUE	FALSE	FALSE	FALSE
74	89	60	29	100	100	100	0	15	22	2	20	73	74	72	2	50	0	0	0	2	106000	1760	28	0	0.52	0	34.22	0	0.951457	2.50333	3	0	0	0	0	0	1	0	TRUE	FALSE	FALSE	FALSE	FALSE	FALSE
58	90	51	39	99	100	93	7	11	66	2	64	77	98	60	38	100	0	0	0	2	90000	1750	58	1	0.55	0	29.3878	0	1.06532	1.85333	1	0	0	0	0	NA	1	1	FALSE	FALSE	FALSE	FALSE	FALSE	FALSE
59	91	52	39	99	100	93	7	12	39	2	37	74	117	54	63	50	0	0	0	3	85000	1800	59	0	0.67	0	26.2346	0	0.964401	1.2	2	0	1	1	0	1	1	1	FALSE	FALSE	TRUE	FALSE	FALSE	TRUE
73	79	63	16	99	100	99	1	16	46	3	43	60	72	50	22	50	0	0	0	2	55000	1620	41	1	0.53	0	20.9572	0	1.09509	3.13333	1	0	0	0	0	0	0	0	FALSE	FALSE	TRUE	FALSE	FALSE	FALSE
70	94	61	33	99	100	95	5	10	38	1	37	72	82	60	22	50	0	5	0	2	58000	1580	37	0	0.52	1	23.2335	0	1.07134	1.80333	1	0	0	0	0	0	1	0	FALSE	FALSE	FALSE	FALSE	FALSE	FALSE
63	74	59	15	99	100	99	1	9	26	1	25	62	76	53	23	50	0	5	0	1	72000	1720	68	0	0.44	1	24.3375	1	0.62492	1.17	3	0	0	0	0	1	1	0	TRUE	FALSE	TRUE	FALSE	FALSE	FALSE
99	109	89	20	98	99	98	1	13	21	1	20	87	103	81	22	40	0	0	0	1	83000	1730	46	0	0.57	0	27.7323	0	0.975152	3.1	2	0	0	0	0	1	0	0	FALSE	FALSE	FALSE	FALSE	FALSE	FALSE
65	85	58	27	99	100	97	3	14	22	2	20	58	66	51	15	70	0	0	0	2	85000	1830	26	0	0.44	0	25.3815	0	1.00281	4.17	1	0	0	0	0	0	0	0	FALSE	FALSE	TRUE	FALSE	FALSE	FALSE
77	86	59	27	99	100	98	2	12	33	2	31	90	103	78	25	50	0	0	0	1	66000	1730	58	0	0.5	0	22.0522	0	0.993939	3.67	2	0	0	0	0	0	0	0	FALSE	FALSE	FALSE	FALSE	FALSE	FALSE
49	60	41	19	99	100	91	9	13	32	2	30	69	114	53	61	50	0	0	0	2	63000	1680	56	1	0.8	0	22.3214	1	0.989375	2.35333	1	0	0	0	0	NA	0	0	FALSE	FALSE	TRUE	TRUE	FALSE	TRUE
82	107	70	37	100	100	99	1	11	18	2	16	98	110	90	20	50	0	0	0	2	100000	1750	42	0	0.67	0	32.6531	0	0.999708	2.35	2	0	0	0	0	0	0	0	FALSE	FALSE	FALSE	FALSE	FALSE	TRUE
65	83	58	25	99	100	98	2	15	26	2	24	57	84	46	38	50	0	0	0	2	74000	1740	62	0	0.48	0	24.4418	0	0.958798	2.41667	3	1	0	0	0	0	0	0	TRUE	FALSE	TRUE	FALSE	FALSE	FALSE
87	105	72	33	100	100	100	0	14	30	2	28	102	102	102	0	50	0	0	0	2	83000	1750	32	0	0.4	0	27.102	0	0.99531	1.73333	2	0	0	0	0	0	0	0	FALSE	FALSE	FALSE	FALSE	FALSE	FALSE
57	77	51	26	100	100	100	0	18	45	3	42	71	98	62	36	50	0	0	0	2	92000	1750	43	0	0.38	0	30.0408	0	0.988057	2.86667	1	0	0	0	0	0	0	0	FALSE	FALSE	FALSE	FALSE	FALSE	FALSE
79	87	67	20	100	100	100	0	17	43	2	41	74	84	69	15	50	0	0	0	2	80000	1640	65	0	0.53	0	29.7442	1	0.987816	2.48333	1	0	0	0	0	0	0	0	FALSE	FALSE	FALSE	FALSE	FALSE	FALSE
76	84	66	18	99	100	99	1	21	43	3	40	55	64	52	12	50	0	0	0	2	68000	1710	31	0	0.5	0	23.255	0	0.991754	1.93667	1	0	0	0	0	1	0	0	FALSE	FALSE	TRUE	FALSE	FALSE	FALSE
75	86	65	21	100	100	100	0	15	23	2	21	80	99	71	28	50	0	0	0	2	69000	1670	60	0	0.52	0	24.7409	1	0.99585	2.18333	2	0	0	1	0	0	0	0	FALSE	FALSE	FALSE	FALSE	FALSE	FALSE
57	76	44	32	100	100	100	0	18	28	2	26	105	138	80	58	25	0	0	0	2	100000	1850	64	0	0.25	0	29.2184	1	0.976516	2.14667	3	0	0	0	0	0	0	0	TRUE	FALSE	FALSE	TRUE	FALSE	TRUE
72	117	50	67	99	100	83	17	33	41	2	39	83	99	67	32	30	0	0	0	2	58000	1600	83	0	0.37	0	22.6562	1	0.935246	1.22	NA	NA	NA	NA	NA	NA	0	0	NA	TRUE	FALSE	TRUE	FALSE	FALSE
64	82	59	23	99	100	98	2	11	19	2	17	56	78	44	34	30	0	0	0	2	86000	1780	51	0	0.61	0	27.143	1	1.00713	1.84667	1	0	0	0	0	1	0	0	FALSE	FALSE	TRUE	FALSE	FALSE	FALSE
66	85	58	27	100	100	100	0	21	70	1	69	73	91	64	27	50	0	0	0	2	53000	1660	19	1	0.22	0	19.2336	1	1.05021	2.25333	1	0	0	0	0	0	NA	NA	FALSE	FALSE	FALSE	FALSE	FALSE	FALSE
68	98	58	40	99	100	97	3	14	41	2	39	53	89	40	49	25	0	0	0	1	75000	1680	74	0	0.62	0	26.5731	1	1.04351	2.23333	3	1	0	0	0	0	0	0	TRUE	FALSE	TRUE	FALSE	FALSE	FALSE
76	150	63	87	99	100	95	5	19	48	2	46	63	82	53	29	60	0	0	0	2	53000	1630	28	0	0.65	0	19.9481	1	0.988404	1.18	NA	NA	NA	NA	NA	NA	1	0	NA	FALSE	TRUE	FALSE	TRUE	FALSE
56	66	48	18	98	100	96	4	14	29	1	28	61	122	47	75	40	0	0	0	1	79000	1650	61	1	0.84	0	29.0174	0	0.981082	5.77	4	1	1	0	1	0	1	0	TRUE	FALSE	TRUE	TRUE	FALSE	TRUE
90	108	67	41	97	100	86	14	13	58	1	57	79	106	36	70	40	0	0	0	1	60000	1650	55	1	0.45	0	22.0386	1	0.975546	4.76333	1	1	0	0	0	1	1	0	FALSE	TRUE	TRUE	FALSE	FALSE	TRUE
90	106	70	36	100	100	100	0	22	49	2	47	107	141	83	58	50	0	0	0	2	86000	1780	62	0	0.33	0	27.143	1	0.993244	2.33333	2	0	0	0	0	NA	1	0	FALSE	FALSE	FALSE	FALSE	FALSE	TRUE
79	87	66	21	96	100	92	8	8	43	2	41	78	91	65	26	45	0	0	0	2	90000	1700	71	0	0.45	0	31.1419	0	0.986471	2.28667	3	0	1	0	0	0	1	0	TRUE	FALSE	FALSE	FALSE	FALSE	FALSE
57	85	49	36	99	100	99	1	15	25	5	20	68	86	44	42	40	0	0	0	3	62000	1720	37	1	0.47	0	20.9573	1	1.0424	1.80333	1	0	0	0	0	NA	1	0	FALSE	FALSE	TRUE	TRUE	FALSE	FALSE
55	63	51	12	99	100	94	6	14	39	2	37	76	84	64	20	35	0	0	0	2	48000	1720	65	1	0.36	0	16.225	1	0.963886	1.94667	1	1	0	0	0	0	0	0	FALSE	FALSE	FALSE	FALSE	FALSE	FALSE
83	151	73	78	99	100	98	2	12	39	2	37	74	85	67	18	35	0	0	0	2	58000	1690	44	1	0.39	0	20.3074	0	1.08868	2.52	2	0	0	0	0	1	1	0	FALSE	FALSE	FALSE	FALSE	TRUE	FALSE
76	89	56	33	97	100	96	4	24	34	2	32	81	95	73	22	100	0	0	0	2	87000	1710	57	1	1.35	0	29.7527	0	1.0667	1.96333	1	0	0	0	0	0	1	0	FALSE	FALSE	FALSE	FALSE	FALSE	FALSE
71	105	50	55	100	100	100	0	13	23	1	22	65	81	57	24	57	0	0	0	2	80000	1760	22	0	1	0	25.8264	0	1.00589	4.07	1	0	0	0	0	0	0	0	FALSE	FALSE	FALSE	TRUE	FALSE	FALSE
63	93	44	49	99	100	99	1	13	37	1	36	74	87	60	27	30	0	5	0	2	70000	1750	53	0	0.33	1	22.8571	0	1.17936	3.4	1	0	0	0	0	0	0	0	FALSE	FALSE	FALSE	TRUE	FALSE	FALSE
73	82	63	19	100	100	100	0	14	31	1	30	67	84	59	25	100	0	5	0	2	82000	1700	74	0	0.9	1	28.3737	1	1.04804	2.81667	2	1	0	0	0	0	0	1	FALSE	FALSE	FALSE	FALSE	FALSE	FALSE
48	66	40	26	100	100	99	1	12	53	2	51	68	89	55	34	40	0	0	0	2	80000	1780	73	1	0.65	0	25.2493	0	1.0341	1.19667	2	1	0	0	0	0	1	1	FALSE	FALSE	TRUE	TRUE	FALSE	FALSE
72	79	66	13	99	100	95	5	12	18	1	17	75	84	67	17	30	0	0	0	2	83000	1700	67	0	0.32	0	28.7197	0	0.975412	2.15333	3	1	0	0	0	0	1	0	TRUE	FALSE	FALSE	FALSE	FALSE	FALSE
85	95	81	14	99	100	95	5	9	22	1	21	94	119	86	33	50	0	0	0.5	2	59000	1630	62	0	0.54	2	22.2063	0	5.6352	2.55333	1	0	0	0	0	0	1	0	FALSE	FALSE	FALSE	FALSE	FALSE	TRUE
73	86	64	22	99	100	96	4	20	45	1	44	77	129	60	69	50	0	0	0	2	60000	1610	73	0	0.55	0	23.1473	1	0.961276	2.56667	2	0	1	0	0	0	1	0	FALSE	FALSE	FALSE	FALSE	FALSE	TRUE
68	82	60	22	99	100	98	2	9	16	1	15	69	88	61	27	50	0	3	0	2	68000	1570	57	0	0.58	1	27.5873	0	1.08105	0.98	2	0	0	0	0	1	1	0	FALSE	FALSE	FALSE	FALSE	FALSE	FALSE
81	101	72	29	100	100	100	0	15	23	1	22	76	84	68	16	55	0	0	0	2	108000	1830	54	0	0.32	0	32.2494	0	0.991273	2.90333	2	1	0	0	0	0	0	0	FALSE	FALSE	FALSE	FALSE	FALSE	FALSE
81	97	70	27	97	100	93	7	12	25	1	24	81	102	63	39	50	0	0	0	2	84000	1580	52	1	0.54	0	33.6485	1	0.996413	2.55333	1	0	0	1	0	0	0	0	FALSE	FALSE	FALSE	FALSE	FALSE	FALSE
80	95	66	29	100	100	100	0	14	26	2	24	70	96	61	35	62	0	0	0	3	67000	1720	22	0	0.63	0	22.6474	0	0.909608	2.91333	NA	NA	NA	NA	NA	NA	0	0	NA	FALSE	FALSE	FALSE	FALSE	FALSE
89	99	84	15	99	100	98	2	23	33	1	32	63	84	56	28	45	0	0	0	2	87000	1770	70	0	0.83	0	27.7698	0	0.972589	3.01333	1	1	0	0	0	1	0	1	FALSE	FALSE	FALSE	FALSE	FALSE	FALSE
78	99	66	33	99	100	94	6	16	33	2	31	84	125	57	68	40	0	0	0	3	62000	1660	52	1	0.53	0	22.4996	1	1.02328	1.98333	1	0	0	0	0	NA	0	1	FALSE	FALSE	FALSE	FALSE	FALSE	TRUE
71	80	63	17	99	100	99	1	25	32	4	28	54	82	41	41	50	0	0	0	2	100000	1730	69	0	0.53	0	33.4124	0	0.989904	1.43333	3	1	0	0	0	NA	1	1	TRUE	FALSE	TRUE	FALSE	FALSE	FALSE
70	88	52	36	100	100	100	0	15	29	1	28	71	102	50	52	50	0	0	0	2	50000	1600	60	0	0.33	0	19.5312	0	1.02483	0.75	1	1	0	1	1	1	1	1	FALSE	FALSE	TRUE	FALSE	FALSE	FALSE
53	57	50	7	100	100	100	0	17	30	12	18	59	67	56	11	40	0	0	0	2	78000	1680	88	0	0.17	0	27.6361	1	0.945168	0.983333	2	1	1	1	0	0	0	0	FALSE	FALSE	FALSE	TRUE	FALSE	FALSE
64	79	43	36	99	100	97	3	12	17	1	16	69	81	62	19	40	0	0	0	2	50000	1600	51	0	0.9	0	19.5312	1	1.00281	2.81667	1	0	0	1	0	0	0	0	FALSE	FALSE	FALSE	TRUE	FALSE	FALSE
94	105	87	18	96	98	94	4	17	24	2	22	85	141	66	75	50	0	0	0	2	69000	1780	54	0	0.29	0	21.7776	0	0.959189	2.58667	2	0	0	0	0	0	0	0	FALSE	FALSE	FALSE	FALSE	FALSE	TRUE
80	89	71	18	99	100	95	5	17	38	3	35	75	171	51	120	40	0	0	0	2	71000	1750	70	0	0.35	0	23.1837	0	0.958597	2.48	2	0	0	0	0	0	0	0	FALSE	FALSE	TRUE	FALSE	FALSE	TRUE
69	80	49	31	99	100	96	4	17	26	2	24	55	63	43	20	40	0	0	0	2	69000	1750	72	0	0.68	0	22.5306	1	0.943651	1.99667	NA	NA	NA	NA	NA	NA	0	0	NA	FALSE	TRUE	TRUE	FALSE	FALSE
75	97	64	33	99	100	99	1	20	49	2	47	82	93	70	23	40	0	0	0	2	71000	1780	56	0	0.45	0	22.4088	1	0.999968	1.35333	1	1	0	0	0	0	0	0	FALSE	FALSE	FALSE	FALSE	FALSE	FALSE
69	81	63	18	100	100	100	0	19	28	1	27	57	65	47	18	20	0	0	0	2	76000	1750	70	0	0.37	0	24.8163	0	0.962936	2.21667	1	1	1	1	0	0	0	0	FALSE	FALSE	TRUE	FALSE	FALSE	FALSE
67	71	61	10	99	100	98	2	10	19	1	18	76	82	71	11	125	0	1	0	3	90000	1600	71	0	0.35	1	35.1562	1	0.493532	2.39667	2	0	0	0	0	0	0	1	FALSE	FALSE	FALSE	FALSE	FALSE	FALSE
83	94	73	21	99	100	94	6	14	32	1	31	86	92	82	10	50	0	5	0	2	68000	1700	53	0	0.44	1	23.5294	0	1.16701	3.45333	2	1	1	0	0	1	1	1	FALSE	FALSE	FALSE	FALSE	FALSE	FALSE
67	93	62	31	100	100	99	1	10	31	1	30	59	87	45	42	50	0	3	0	2	90000	1760	68	0	0.73	1	29.0548	0	0.889674	5.25	4	0	0	1	0	0	1	1	TRUE	FALSE	TRUE	FALSE	FALSE	FALSE
101	127	72	55	99	100	93	7	17	46	1	45	70	100	24	76	50	0	0	0	2	67000	1800	83	1	0.78	0	20.679	0	1.05361	1.44667	NA	NA	NA	NA	NA	NA	1	1	NA	FALSE	TRUE	FALSE	TRUE	FALSE
83	110	73	37	98	100	93	7	14	28	1	27	94	110	87	23	50	0	0	0	3	65000	1830	59	0	0.47	0	19.4094	0	0.954886	2.00333	2	0	0	0	0	0	1	0	FALSE	FALSE	FALSE	FALSE	FALSE	TRUE
84	98	72	26	98	100	93	7	13	23	2	21	79	112	47	65	50	0	0	0	2	90000	1650	79	1	0.51	0	33.0579	1	1.15022	1.03	3	0	0	1	0	0	1	0	TRUE	FALSE	TRUE	FALSE	FALSE	TRUE
70	85	57	28	99	100	94	6	6	21	1	20	83	97	76	21	25	0	0	0	2	55000	1730	65	0	0.26	0	18.3768	0	0.938183	0.53	NA	NA	NA	NA	NA	NA	0	0	NA	FALSE	FALSE	FALSE	FALSE	FALSE
64	76	60	16	99	100	96	4	16	22	1	21	55	62	51	11	50	0	0	0	2	85000	1750	53	0	0.59	0	27.7551	0	0.959222	2.95333	3	0	0	0	0	1	0	0	TRUE	FALSE	TRUE	FALSE	FALSE	FALSE
84	106	73	33	99	100	99	1	18	34	2	32	94	112	76	36	50	0	0	0	2	112000	16980	60	0	0.34	0	0.388457	1	0.963742	2.55333	1	0	0	0	0	0	0	0	FALSE	FALSE	FALSE	FALSE	FALSE	TRUE
85	98	78	20	100	100	100	0	16	21	2	19	61	79	54	25	50	0	0	0	1	52000	1540	71	0	0.32	0	21.9261	1	0.940359	2.16667	2	0	0	0	0	0	0	0	FALSE	FALSE	TRUE	FALSE	FALSE	FALSE
69	92	64	28	100	100	100	0	17	26	2	24	68	87	58	29	50	0	0	0	2	40000	1450	76	0	0.48	0	19.025	1	0.935907	2.54667	3	0	0	0	0	0	1	1	TRUE	FALSE	FALSE	FALSE	FALSE	FALSE
71	80	65	15	100	100	100	0	18	37	2	35	72	99	58	41	50	0	0	0	2	110000	1890	59	0	0.35	0	30.7942	0	0.983848	2.3	1	1	0	0	0	0	0	0	FALSE	FALSE	FALSE	FALSE	FALSE	FALSE
65	78	52	26	98	100	98	2	19	27	10	17	63	72	58	14	30	0	0	0	2	74000	1620	51	0	0.43	0	28.1969	0	0.97633	1.54667	1	0	0	0	0	0	0	0	FALSE	FALSE	FALSE	FALSE	FALSE	FALSE
65	73	52	21	99	100	99	1	14	21	2	19	82	83	82	1	10	0	0	0	2	104000	1700	67	0	0.32	0	35.9862	0	0.994281	3.76667	3	0	0	0	0	0	0	0	TRUE	FALSE	FALSE	FALSE	FALSE	FALSE
74	89	66	23	99	100	97	3	13	23	1	22	64	69	57	12	10	0	0	0	2	70000	1640	48	0	0.22	0	26.0262	0	0.971275	2.57	2	0	0	0	0	0	0	0	FALSE	FALSE	FALSE	FALSE	FALSE	FALSE
45	54	41	13	99	100	94	6	16	33	2	31	57	63	51	12	10	0	0	0	2	85000	1780	79	0	0.22	0	26.8274	0	0.96867	3.06667	2	0	0	0	0	0	0	0	FALSE	FALSE	TRUE	TRUE	FALSE	FALSE
64	79	47	32	99	100	97	3	11	25	2	23	71	75	67	8	10	0	0	0	2	75000	1670	57	1	0.35	0	26.8923	1	0.998498	2.36333	NA	0	0	0	0	0	0	0	NA	FALSE	FALSE	TRUE	FALSE	FALSE
77	95	73	22	99	100	97	3	14	54	1	53	82	95	74	21	40	0	0	0	1	65000	1600	61	1	0.69	0	25.3906	0	1.02162	3.83667	2	1	0	0	0	0	0	0	FALSE	FALSE	FALSE	FALSE	FALSE	FALSE
57	66	54	12	99	100	98	2	15	35	5	30	80	104	70	34	30	0	0	0	2	108000	1750	61	0	0.3	0	35.2653	0	0.984531	3.22	3	0	0	0	0	0	0	0	TRUE	FALSE	FALSE	FALSE	FALSE	FALSE
61	83	52	31	99	100	96	4	20	29	8	21	71	81	58	23	50	0	0	0	2	58000	1690	73	0	0.53	0	20.3074	0	0.948613	2.83	1	0	0	0	0	0	0	0	FALSE	FALSE	FALSE	FALSE	FALSE	FALSE
81	95	78	17	99	100	98	2	12	27	2	25	93	109	83	26	50	0	0	0	2	68000	1660	53	0	0.5	0	24.677	0	0.965857	1.79667	2	0	0	0	0	0	0	0	FALSE	FALSE	FALSE	FALSE	FALSE	TRUE
86	104	73	31	96	98	95	3	11	30	2	28	86	102	77	25	10	0	0	0	2	144000	1750	64	0	0.22	0	47.0204	0	0.987608	2.03667	3	1	0	0	0	0	0	0	TRUE	FALSE	FALSE	FALSE	FALSE	FALSE
66	102	55	47	99	100	84	16	11	37	2	35	61	101	50	51	10	0	0	0.5	4	60000	1700	30	1	0.5	2	20.7612	1	0.896623	2.08667	1	0	0	0	0	0	1	0	FALSE	TRUE	TRUE	FALSE	FALSE	FALSE
49	69	40	29	99	100	95	5	12	24	4	20	85	101	72	29	10	0	0	0	4	52000	1710	52	0	0.38	0	17.7832	0	0.946085	0.966667	1	0	0	0	0	1	0	0	FALSE	FALSE	FALSE	TRUE	FALSE	FALSE
53	65	48	17	100	100	100	0	16	32	2	30	57	84	47	37	50	0	0	0	2	89000	1790	69	0	0.6	0	27.7769	0	0.972427	3.47	NA	1	0	0	0	0	0	1	NA	FALSE	TRUE	TRUE	FALSE	FALSE
55	61	53	8	100	100	100	0	18	55	2	53	74	95	50	45	50	0	0	0	2	63000	1650	61	0	0.74	0	23.1405	0	0.960205	3.02	2	1	0	0	0	0	0	1	FALSE	FALSE	TRUE	FALSE	FALSE	FALSE
76	117	55	62	99	100	97	3	20	33	2	31	90	104	73	31	50	0	0	0	2	72000	1780	52	0	0.4	0	22.7244	0	0.961881	2.26667	2	0	0	1	0	0	1	1	FALSE	FALSE	FALSE	FALSE	FALSE	FALSE
60	87	55	32	97	100	95	5	18	52	1	51	74	94	55	39	50	0	0	0	2	90000	1660	73	1	0.45	0	32.6608	1	1.17497	1.31667	4	1	0	0	0	NA	0	0	TRUE	FALSE	TRUE	FALSE	FALSE	FALSE
81	91	77	14	99	100	95	5	21	38	2	36	95	128	54	74	50	0	0	0	2	52000	1690	71	0	0.36	0	18.2066	0	1.02209	1.06333	2	1	0	1	1	0	0	0	FALSE	FALSE	TRUE	FALSE	FALSE	TRUE
79	92	70	22	100	100	100	0	5	16	1	15	75	86	68	18	10	0	0	0	2	67000	1670	73	0	0.33	0	24.0238	1	0.962178	2.55	2	0	0	0	0	0	1	0	FALSE	FALSE	FALSE	FALSE	FALSE	FALSE
74	83	65	18	100	100	100	0	10	18	2	16	83	97	75	22	10	0	0	0	2	97000	1770	65	0	0.45	0	30.9617	0	0.982414	2.02	1	0	0	0	0	0	1	0	FALSE	FALSE	FALSE	FALSE	FALSE	FALSE
93	107	73	34	99	100	93	7	6	20	2	18	91	114	80	34	10	0	0	0	2	58000	16010	72	1	0.5	0	0.22628	1	0.948293	2.11333	2	1	0	0	0	NA	1	0	FALSE	FALSE	FALSE	FALSE	FALSE	TRUE
84	88	70	18	99	100	95	5	8	18	2	16	84	92	78	14	10	0	0	0	2	84000	1730	57	0	0.55	0	28.0664	0	0.963456	2.28	3	1	0	0	0	1	1	0	TRUE	FALSE	FALSE	FALSE	FALSE	FALSE
56	83	47	36	100	100	100	0	9	19	2	17	54	74	37	37	10	0	3	0	3	50000	1550	84	1	0.75	1	20.8117	1	0.72971	2.38667	1	0	0	0	0	0	1	0	FALSE	FALSE	TRUE	TRUE	FALSE	FALSE
69	85	63	22	98	100	93	7	6	13	2	11	91	101	81	20	10	0	0	0	2	96000	1640	69	0	0.63	0	35.693	1	0.987622	1.59667	3	1	1	1	0	0	1	0	TRUE	FALSE	FALSE	FALSE	FALSE	FALSE
65	77	62	15	99	100	98	2	9	20	1	19	74	78	70	8	10	0	0	0	2	89000	1730	81	0	0.35	0	29.737	0	0.971651	1.32	1	1	0	0	0	0	1	0	FALSE	FALSE	FALSE	FALSE	FALSE	FALSE
82	98	76	22	99	100	98	2	19	29	2	27	89	123	66	57	30	0	0	0	2	59000	1610	66	0	0.57	0	22.7615	1	0.9775	2.2	1	1	0	0	0	0	0	0	FALSE	FALSE	FALSE	FALSE	FALSE	TRUE
70	93	52	41	99	100	99	1	14	35	2	33	67	76	56	20	50	0	0	0	2	72000	1720	34	1	0.46	0	24.3375	0	1.10419	2.06333	2	0	0	1	0	0	0	0	FALSE	FALSE	FALSE	FALSE	FALSE	FALSE
77	90	61	29	99	100	96	4	16	20	3	17	63	81	54	27	50	0	0	0	2	75000	1530	77	1	0.42	0	32.039	1	0.979712	2.02	1	1	0	0	0	0	0	0	FALSE	FALSE	TRUE	FALSE	FALSE	FALSE
84	107	78	29	99	100	99	1	16	27	2	25	73	81	69	12	50	0	0	0	1	75000	1670	28	1	0.47	0	26.8923	1	0.997624	2.75	2	0	0	0	0	0	0	0	FALSE	FALSE	FALSE	FALSE	FALSE	FALSE
62	77	48	29	99	100	94	6	16	27	1	26	71	95	53	42	85	0	0	0	2	80000	1700	75	0	0.73	0	27.6817	1	0.952578	1.51333	NA	NA	NA	NA	NA	NA	0	0	NA	FALSE	TRUE	TRUE	FALSE	FALSE
109	143	94	49	99	100	99	1	16	33	1	32	70	86	58	28	55	0	0	0	2	90000	1700	50	1	0.88	0	31.1419	1	0.998766	4.34667	NA	1	0	0	0	0	0	0	NA	FALSE	FALSE	FALSE	TRUE	FALSE
80	91	72	19	99	100	99	1	15	22	2	20	80	91	76	15	50	0	0	0	2	90000	1730	43	0	0.55	0	30.0712	0	0.98818	3.37	1	0	0	0	0	NA	0	1	FALSE	FALSE	FALSE	FALSE	FALSE	FALSE
91	100	81	19	99	100	85	15	14	39	1	38	70	89	61	28	50	0	0	0	3	96000	1860	60	1	0.98	0	27.7489	0	1.00783	2.53	NA	NA	NA	NA	NA	NA	0	1	NA	TRUE	FALSE	FALSE	FALSE	FALSE
69	79	66	13	99	100	95	5	14	23	2	21	81	97	70	27	43	0	0	0	3	94000	1760	60	0	0.65	0	30.3461	0	1.1482	2.64667	2	1	1	0	1	0	1	1	FALSE	FALSE	FALSE	FALSE	FALSE	FALSE
73	96	55	41	100	100	100	0	15	35	2	33	99	110	92	18	37	0	0	0	2	81000	1790	62	0	0.37	0	25.2801	0	0.961897	1.95333	3	1	0	0	0	0	1	0	TRUE	FALSE	FALSE	FALSE	FALSE	TRUE
63	86	51	35	99	100	99	1	17	45	2	43	84	95	73	22	50	0	0	0	1	69000	1690	46	0	0.4	0	24.1588	0	0.980145	0.87	NA	NA	NA	NA	NA	NA	0	0	NA	FALSE	FALSE	FALSE	FALSE	FALSE
74	100	54	46	99	100	90	10	16	30	1	29	73	100	48	52	50	0	3	0	4	100000	1850	31	0	0.88	1	29.2184	0	0.765318	3.7	NA	0	0	0	0	1	0	0	NA	TRUE	TRUE	FALSE	FALSE	FALSE
58	67	49	18	99	100	93	7	12	32	2	30	92	115	75	40	50	0	0	0	2	72000	1720	72	0	0.48	0	24.3375	0	0.960974	2.13	1	1	1	0	0	0	1	0	FALSE	FALSE	FALSE	TRUE	FALSE	TRUE
103	130	90	40	99	100	98	2	9	28	2	26	65	76	57	19	50	0	0	0	2	57000	1570	40	1	0.62	0	23.1247	1	1.01259	2.22	1	0	0	0	0	1	1	0	FALSE	FALSE	FALSE	FALSE	TRUE	FALSE
79	89	68	21	99	100	96	4	12	32	2	30	73	90	57	33	43	0	0	0	2	65000	1780	68	0	0.55	0	20.5151	0	0.952275	2.25	2	0	0	0	0	1	1	0	FALSE	FALSE	FALSE	FALSE	FALSE	FALSE
64	79	57	22	94	98	91	7	14	42	2	40	84	115	70	45	40	0	0	0	2	87000	1710	66	1	0.6	0	29.7527	0	1.06108	2.53333	2	1	0	0	0	0	1	0	FALSE	FALSE	FALSE	FALSE	FALSE	TRUE
67	94	59	35	99	100	91	9	16	32	2	30	77	94	57	37	30	0	0	0	2	73000	1600	71	0	0.62	0	28.5156	1	0.971075	1.50333	2	0	0	0	0	0	1	0	FALSE	FALSE	FALSE	FALSE	FALSE	FALSE
66	73	57	16	99	100	98	2	14	31	2	29	77	91	66	25	20	0	0	0	2	75000	1750	74	0	0.38	0	24.4898	0	0.960147	1.13	2	1	0	1	0	1	1	0	FALSE	FALSE	FALSE	FALSE	FALSE	FALSE
60	79	51	28	99	100	94	6	20	47	2	45	80	91	70	21	25	0	0	0	2	56000	1600	79	1	0.53	0	21.875	1	1.00099	0.996667	NA	NA	NA	NA	NA	NA	1	0	NA	FALSE	FALSE	FALSE	FALSE	FALSE
56	69	44	25	98	100	84	16	10	23	1	22	91	94	88	6	40	0	3	0	2	90000	1830	43	0	0.36	1	26.8745	0	0.599382	2.83	2	0	0	0	1	0	0	0	FALSE	TRUE	FALSE	TRUE	FALSE	FALSE
75	97	63	34	100	100	100	0	9	29	1	28	68	94	51	43	30	0	3	0	2	80000	1570	70	0	0.36	1	32.4557	1	1.07212	2.03	3	0	0	0	0	1	0	0	TRUE	FALSE	TRUE	FALSE	FALSE	FALSE
81	114	65	49	100	100	100	0	15	42	2	40	63	94	49	45	50	0	0	0	2	110000	1690	40	1	0.51	0	38.5141	1	0.991238	3.11333	1	0	0	0	0	0	0	0	FALSE	FALSE	TRUE	FALSE	FALSE	FALSE
80	116	68	48	100	100	100	0	18	37	1	36	63	118	44	74	50	0	3	0	2	60000	1600	25	0	0.58	1	23.4375	1	0.715768	2.49667	1	0	0	0	0	0	0	0	FALSE	FALSE	TRUE	FALSE	FALSE	TRUE
72	95	65	30	99	100	96	4	18	25	1	24	61	95	48	47	50	0	0	0	2	80000	1800	68	0	0.5	0	24.6914	0	0.965289	2.73667	3	0	0	0	0	0	0	1	TRUE	FALSE	TRUE	FALSE	FALSE	FALSE
70	80	54	26	98	100	95	5	12	65	1	64	69	89	55	34	47	0	0	0	2	107000	1700	82	1	0.7	0	37.0242	0	1.16813	1.80333	NA	NA	NA	NA	NA	NA	1	1	NA	FALSE	TRUE	FALSE	FALSE	FALSE
65	77	62	15	99	100	96	4	16	28	3	25	76	118	58	60	25	0	0	0	3	66000	1480	84	0	0.48	0	30.1315	1	0.907832	1.2	NA	NA	NA	NA	NA	NA	1	0	NA	FALSE	FALSE	FALSE	FALSE	TRUE
61	82	57	25	97	98	97	1	7	38	2	36	56	64	53	11	50	0	0	0	2	90000	1780	54	0	0.63	0	28.4055	0	0.961463	2.31667	3	0	0	0	0	0	1	0	TRUE	FALSE	TRUE	FALSE	FALSE	FALSE
80	91	63	28	99	100	99	1	16	32	1	31	74	96	60	36	50	0	0	0	2	72000	1690	69	0	0.34	0	25.2092	0	0.968338	1.38667	4	1	0	0	0	0	0	0	TRUE	FALSE	FALSE	FALSE	FALSE	FALSE
81	115	69	46	99	100	97	3	18	25	1	24	80	106	68	38	50	0	0	0	2	64000	1640	71	0	0.6	0	23.7954	0	0.964179	1.11667	3	1	0	1	0	1	1	0	TRUE	FALSE	FALSE	FALSE	FALSE	TRUE
66	84	61	23	99	100	98	2	16	25	1	24	83	106	69	37	50	0	0	0	2	65000	1780	66	0	0.31	0	20.5151	0	0.95363	2.33	1	0	0	0	0	0	0	0	FALSE	FALSE	FALSE	FALSE	FALSE	TRUE
62	87	52	35	99	100	97	3	16	34	5	29	69	87	49	38	35	0	0	0	1	46000	1620	58	0	0.45	0	17.5278	1	0.959006	2.94667	1	0	0	0	0	0	0	0	FALSE	FALSE	TRUE	FALSE	FALSE	FALSE
63	83	60	23	100	100	100	0	21	27	10	17	85	102	67	35	50	0	0	0	2	118000	1850	70	0	0.43	0	34.4777	0	0.986922	2.53	NA	1	0	0	0	NA	0	0	NA	FALSE	FALSE	FALSE	FALSE	FALSE
63	72	60	12	99	100	96	4	10	21	1	20	75	86	53	33	50	0	3	0	2	62000	1570	61	0	0.38	1	25.1532	0	0.636989	2.5	3	1	0	0	1	0	1	1	TRUE	FALSE	TRUE	FALSE	FALSE	FALSE
102	116	90	26	99	100	98	2	17	36	3	33	70	101	55	46	50	0	0	0	2	85000	1800	81	0	0.57	0	26.2346	0	0.965567	1.21667	1	0	0	0	0	NA	0	1	FALSE	FALSE	TRUE	FALSE	FALSE	FALSE
75	86	60	26	99	100	96	4	18	26	1	25	62	70	56	14	40	0	3	0	2	57000	1600	58	0	0.25	1	22.2656	0	1.18087	2.81333	2	0	0	0	0	1	0	0	FALSE	FALSE	FALSE	FALSE	FALSE	FALSE
72	92	64	28	99	100	82	18	13	21	1	20	77	106	63	43	50	0	3	0	2	70000	1700	53	0	0.39	1	24.2215	1	0.816309	2.17	1	0	0	0	0	1	1	1	FALSE	TRUE	FALSE	FALSE	FALSE	TRUE
75	101	66	35	96	100	93	7	16	22	1	21	60	74	49	25	50	0	3	0	2	90000	1800	65	0	0.35	1	27.7778	0	1.05578	1.7	2	1	0	0	0	0	0	0	FALSE	FALSE	TRUE	FALSE	FALSE	FALSE
79	90	73	17	99	100	98	2	16	22	2	20	64	82	55	27	30	0	0	0	1	60000	1690	62	0	0.32	0	21.0077	0	1.00212	1.43333	3	0	0	0	0	0	0	0	TRUE	FALSE	TRUE	FALSE	FALSE	FALSE
92	106	83	23	99	100	97	3	12	65	2	63	61	124	35	89	25	0	0	0	3	75000	1660	87	0	0.33	0	27.2173	0	0.937395	2.35	1	1	1	0	0	0	0	0	FALSE	FALSE	TRUE	FALSE	FALSE	TRUE
69	75	62	13	99	100	93	7	19	48	1	47	75	94	50	44	50	0	0	0	2	103000	1700	67	0	0.38	0	35.6401	1	1.08236	3.31667	2	1	0	1	1	0	1	0	FALSE	FALSE	TRUE	FALSE	FALSE	FALSE
75	87	69	18	99	100	99	1	11	25	1	24	71	89	64	25	50	0	0	0	2	50000	1680	57	1	0.26	0	17.7154	0	1.04557	2.78	NA	0	0	0	0	NA	0	0	NA	FALSE	FALSE	FALSE	FALSE	FALSE
92	118	83	35	100	100	100	0	19	27	1	26	78	80	77	3	30	0	0	0	3	98000	1830	57	0	0.26	0	29.2633	1	1.12749	2.39667	1	1	0	0	0	0	0	0	FALSE	FALSE	FALSE	FALSE	FALSE	FALSE
85	107	75	32	100	100	100	0	11	31	1	30	81	103	65	38	30	0	0	0	2	92000	1780	63	0	0.32	0	29.0367	0	0.976503	1.86667	1	0	0	0	0	0	1	1	FALSE	FALSE	FALSE	FALSE	FALSE	FALSE
71	84	52	32	100	100	100	0	16	26	1	25	84	91	72	19	50	0	0	0	2	66000	1600	66	0	0.59	0	25.7812	1	0.980581	2.13667	2	0	0	0	0	0	1	1	FALSE	FALSE	FALSE	FALSE	FALSE	FALSE
70	82	65	17	100	100	100	0	13	36	1	35	71	77	63	14	50	0	0	0	2	56000	1650	47	1	0.48	0	20.5693	1	0.999525	1.56333	1	0	0	0	0	1	1	0	FALSE	FALSE	FALSE	FALSE	FALSE	FALSE
110	143	79	64	97	100	92	8	14	33	1	32	71	93	53	40	100	0	0	0	2	83000	1800	58	0	1.11	0	25.6173	0	1.02302	2.98	3	1	0	1	1	1	0	1	TRUE	FALSE	TRUE	FALSE	TRUE	FALSE
74	87	61	26	100	100	100	0	13	38	1	37	64	78	59	19	50	0	0	0	2	50000	1750	22	1	0.57	0	16.3265	0	1.09663	5.73333	1	0	0	0	0	1	0	0	FALSE	FALSE	FALSE	FALSE	FALSE	FALSE
59	66	53	13	100	100	100	0	11	17	1	16	53	59	48	11	40	0	3	0	1	61000	1690	62	0	0.3	1	21.3578	0	0.775631	2.25333	1	0	0	1	0	0	0	0	FALSE	FALSE	TRUE	FALSE	FALSE	FALSE
61	89	46	43	98	100	91	9	10	45	1	44	62	90	54	36	40	0	0	0	1	55000	1800	77	1	0.48	0	16.9753	1	0.933497	1.73333	2	1	0	0	0	0	0	0	FALSE	FALSE	TRUE	TRUE	FALSE	FALSE
61	78	53	25	100	100	100	0	17	25	1	24	57	105	46	59	50	0	0	0	2	76000	1670	76	0	0.48	0	27.2509	0	0.980933	1.76667	3	0	0	0	0	0	1	0	TRUE	FALSE	TRUE	FALSE	FALSE	TRUE
94	130	67	63	100	100	100	0	18	37	1	36	58	99	38	61	50	0	0	0	2	56000	1470	87	0	1.23	0	25.9151	1	0.941332	2.28333	NA	1	0	0	0	NA	1	1	NA	FALSE	TRUE	FALSE	TRUE	FALSE
63	71	46	25	99	100	98	2	14	39	1	38	68	83	61	22	50	0	0	0	2	92000	1800	56	1	0.74	0	28.3951	1	1.00122	3.28667	2	0	0	0	0	0	1	0	FALSE	FALSE	FALSE	TRUE	FALSE	FALSE
66	72	56	16	99	100	97	3	10	15	1	14	62	64	60	4	40	0	3	0	2	90000	1770	61	0	0.33	1	28.7274	0	1.04965	2.44667	2	1	0	0	0	0	0	0	FALSE	FALSE	FALSE	FALSE	FALSE	FALSE
69	79	58	21	100	100	100	0	14	31	1	30	56	74	41	33	30	0	0	0	2	64000	1770	51	1	0.4	0	20.4284	1	0.993559	3.01667	1	0	0	0	0	0	0	0	FALSE	FALSE	TRUE	FALSE	FALSE	FALSE
61	73	52	21	99	100	99	1	8	23	1	22	67	81	58	23	50	0	0	0	2	70000	1650	63	1	0.42	0	25.7117	0	1.05387	2.57	2	1	1	0	0	0	1	0	FALSE	FALSE	FALSE	FALSE	FALSE	FALSE
78	89	65	24	98	100	95	5	14	39	1	38	61	84	52	32	50	0	0	0	2	75000	1790	61	1	0.93	0	23.4075	0	1.15134	4.71667	3	0	1	0	0	0	0	0	TRUE	FALSE	TRUE	FALSE	FALSE	FALSE
48	55	43	12	100	100	100	0	11	25	1	24	85	103	70	33	32	0	0	0	2	73000	1730	52	1	0.72	0	24.3911	1	0.999433	1.95	1	0	0	1	0	0	0	0	FALSE	FALSE	FALSE	TRUE	FALSE	FALSE
81	92	65	27	99	100	98	2	13	27	2	25	65	87	58	29	46	0	0	0	2	89000	1750	59	0	0.51	0	29.0612	0	1.01537	4.89667	2	0	0	0	1	0	0	0	FALSE	FALSE	FALSE	FALSE	FALSE	FALSE
64	90	57	33	99	100	95	5	12	44	1	43	69	113	45	68	43	0	0	0	2	64000	1620	80	1	0.67	0	24.3865	1	0.963216	1.60333	1	1	1	0	0	0	0	0	FALSE	FALSE	TRUE	FALSE	FALSE	TRUE
83	97	66	31	100	100	100	0	24	38	1	37	82	93	69	24	48	0	0	0	2	75000	1750	24	0	0.45	0	24.4898	0	0.962159	1.38333	NA	NA	NA	NA	NA	NA	0	0	NA	FALSE	FALSE	FALSE	FALSE	FALSE
79	86	66	20	98	100	91	9	15	29	1	28	83	96	77	19	50	0	0	0	2	52000	1640	65	0	0.42	0	19.3337	0	0.951031	1.47	1	0	1	1	0	0	1	0	FALSE	FALSE	FALSE	FALSE	FALSE	FALSE
82	96	77	19	100	100	100	0	24	33	3	30	85	99	79	20	50	0	0	0	3	66000	1620	59	0	0.24	0	25.1486	0	0.962416	2.02	2	1	0	0	0	0	1	0	FALSE	FALSE	FALSE	FALSE	FALSE	FALSE
96	122	86	36	100	100	100	0	13	22	2	20	103	121	92	29	50	0	0	0	2	87000	1700	56	0	0.38	0	30.1038	0	0.966926	2.45	3	0	0	1	0	0	1	0	TRUE	FALSE	FALSE	FALSE	TRUE	TRUE
69	83	61	22	99	100	98	2	16	65	2	63	96	106	79	27	50	0	0	0	2	73000	1700	66	0	0.58	0	25.2595	0	0.945208	1.23333	NA	NA	NA	NA	NA	NA	1	0	NA	FALSE	FALSE	FALSE	FALSE	TRUE
67	81	57	24	100	100	100	0	23	53	1	52	88	106	77	29	25	0	0	0	2	75000	1730	75	0	0.4	0	25.0593	1	0.958447	2.18333	2	1	0	0	0	0	0	1	FALSE	FALSE	FALSE	FALSE	FALSE	TRUE
65	78	59	19	99	100	96	4	17	21	11	10	85	92	78	14	20	0	0	0	2	69000	1700	72	0	0.25	0	23.8754	1	0.949427	2.72	3	1	0	0	0	0	0	0	TRUE	FALSE	FALSE	FALSE	FALSE	FALSE
80	96	70	26	99	100	96	4	23	33	2	31	60	68	52	16	10	0	0	0	1	58000	1690	60	0	0.75	0	20.3074	1	0.953841	1.83333	1	0	0	1	0	0	0	0	FALSE	FALSE	TRUE	FALSE	FALSE	FALSE
91	104	73	31	99	100	99	1	10	26	2	24	72	83	64	19	30	0	0	0	2	65000	1670	71	0	0.38	0	23.3067	1	0.966096	1.44667	1	0	0	0	0	1	1	0	FALSE	FALSE	FALSE	FALSE	FALSE	FALSE
66	79	58	21	99	100	99	1	10	18	1	17	71	79	65	14	25	0	0	0	2	78000	1670	60	1	0.4	0	27.968	0	0.975555	2.16333	2	0	0	0	1	0	1	0	FALSE	FALSE	FALSE	FALSE	FALSE	FALSE
71	80	57	23	95	98	93	5	12	18	2	16	72	81	65	16	35	0	0	0	1	72000	1720	56	0	0.33	0	24.3375	0	0.986175	2.13333	NA	0	0	0	0	0	1	0	NA	FALSE	FALSE	FALSE	FALSE	FALSE
92	104	68	36	99	100	90	10	14	33	1	32	92	124	71	53	64	0	0	0	2	76000	1750	71	0	0.72	0	24.8163	1	0.967388	2.58333	2	1	0	0	0	0	1	0	FALSE	TRUE	FALSE	FALSE	FALSE	TRUE
67	89	61	28	100	100	100	0	22	93	1	92	90	106	81	25	50	0	0	0	2	68000	1620	83	1	0.65	0	25.9107	0	1.011	2.20333	2	1	0	0	0	0	1	0	FALSE	FALSE	FALSE	FALSE	FALSE	TRUE
85	99	57	42	98	100	96	4	18	24	1	23	71	89	51	38	50	0	0	0	2	73000	1620	39	1	0.75	0	27.8159	0	1.18065	3.72	3	0	0	0	0	NA	1	0	TRUE	FALSE	TRUE	FALSE	FALSE	FALSE
67	105	62	43	99	100	99	1	17	47	1	46	67	94	47	47	40	0	0	0	2	77000	1750	65	0	0.93	0	25.1429	1	0.982488	7.75	2	0	0	1	0	0	0	0	FALSE	FALSE	TRUE	FALSE	FALSE	FALSE
60	78	52	26	100	100	100	0	14	22	2	20	77	94	62	32	30	0	0	0	2	72000	1650	65	0	0.43	0	26.4463	0	0.96788	1.95	1	0	0	0	0	0	1	1	FALSE	FALSE	FALSE	FALSE	FALSE	FALSE
71	84	60	24	100	100	100	0	14	24	2	22	66	70	62	8	45	0	0	0	2	111000	1870	34	0	0.27	0	31.7424	0	0.997096	1.6	1	0	0	0	0	0	0	0	FALSE	FALSE	FALSE	FALSE	FALSE	FALSE
64	91	50	41	99	100	81	19	14	39	1	38	66	80	61	19	20	0	0	0	2	45000	1500	66	1	1.2	0	20	0	1.10408	3.84667	3	0	0	0	0	0	1	1	TRUE	TRUE	FALSE	TRUE	FALSE	FALSE
63	78	55	23	100	100	100	0	17	26	1	25	49	55	43	12	50	0	0	0	2	106000	1780	33	0	1.11	0	33.4554	1	1.02454	5.43	2	0	0	1	0	0	0	0	FALSE	FALSE	TRUE	FALSE	FALSE	FALSE
77	91	73	18	99	100	92	8	14	27	1	26	55	64	50	14	10	0	0	0	2	60000	1600	62	0	0.32	0	23.4375	0	0.960682	2.96667	1	0	0	1	0	1	0	0	FALSE	FALSE	TRUE	FALSE	FALSE	FALSE
62	69	53	16	99	100	87	13	12	28	1	27	75	111	63	48	10	0	0	0	2	120000	1700	74	0	0.45	0	41.5225	0	1.00193	2.61333	3	0	0	1	0	0	0	1	TRUE	TRUE	FALSE	FALSE	FALSE	TRUE
76	88	60	28	97	100	84	16	15	43	1	42	81	104	65	39	140	0	0	0	2	60000	1610	55	0	0.73	0	23.1473	0	0.961727	3.16667	1	1	0	0	0	0	0	0	FALSE	TRUE	FALSE	FALSE	FALSE	FALSE
68	79	57	22	99	100	99	1	14	51	1	50	66	77	58	19	125	0	0	0	2	44000	1530	60	0	1.23	0	18.7962	0	0.951706	3.41333	1	0	1	1	0	0	0	0	FALSE	FALSE	FALSE	FALSE	FALSE	FALSE
68	82	59	23	99	100	95	5	13	34	1	33	55	82	45	37	50	0	0	0	1	56000	1700	53	0	0.64	0	19.3772	0	0.992968	2.12	1	0	0	0	0	0	0	1	FALSE	FALSE	TRUE	FALSE	FALSE	FALSE
70	90	64	26	99	100	97	3	8	30	1	29	68	95	55	40	75	0	0	0	2	130000	1840	55	0	0.45	0	38.3979	0	1.03247	2.35	2	1	0	0	1	0	1	0	FALSE	FALSE	TRUE	FALSE	FALSE	FALSE
83	99	76	23	100	100	100	0	18	31	1	30	88	105	74	31	40	0	0	0	2	76000	1730	68	0	0.48	0	25.3934	0	0.964651	2.78	1	1	0	0	0	0	0	1	FALSE	FALSE	FALSE	FALSE	FALSE	TRUE
78	100	65	35	99	100	85	15	16	30	1	29	79	93	70	23	30	0	0	0	2	60000	1720	32	0	0.43	0	20.2812	0	0.985659	2.01667	1	0	0	0	0	0	0	1	FALSE	TRUE	FALSE	FALSE	FALSE	FALSE
67	87	58	29	98	100	94	6	22	32	1	31	66	105	50	55	75	0	0	0	2	76000	1740	70	0	0.62	0	25.1024	0	0.963651	1.81667	2	1	0	0	0	1	1	1	FALSE	FALSE	TRUE	FALSE	FALSE	TRUE
80	96	61	35	99	100	98	2	12	32	1	31	60	79	39	40	75	0	0	0	2	76000	1690	61	0	0.76	0	26.6097	1	0.995424	1.84667	2	0	0	0	0	0	0	0	FALSE	FALSE	TRUE	FALSE	FALSE	FALSE
102	168	92	76	99	100	92	8	12	36	1	35	55	79	38	41	50	0	0	0	2	54000	1600	85	1	0.87	0	21.0938	1	0.985524	1.40333	NA	NA	NA	NA	NA	NA	0	0	NA	FALSE	TRUE	FALSE	TRUE	FALSE
83	102	57	45	100	100	100	0	15	27	1	26	79	86	72	14	100	0	0	0	2	89000	1850	46	0	0.46	0	26.0044	0	0.949577	1.84667	4	0	0	0	0	0	0	0	TRUE	FALSE	FALSE	FALSE	FALSE	FALSE
68	86	61	25	99	100	98	2	19	30	1	29	78	97	62	35	40	0	0	0	2	55000	1650	60	1	0.47	0	20.202	0	1.04446	1.17	2	1	0	1	0	0	0	0	FALSE	FALSE	FALSE	FALSE	FALSE	FALSE
66	74	51	23	99	100	97	3	14	24	1	23	68	75	60	15	45	0	0	0	2	61000	1700	51	0	0.73	0	21.1073	0	1.03417	1.09667	2	0	0	1	1	1	0	1	FALSE	FALSE	FALSE	FALSE	FALSE	FALSE
68	78	62	16	98	100	97	3	19	26	1	25	57	131	44	87	75	0	0	0	2	105000	1830	51	1	0.83	0	31.3536	0	1.06929	3.91667	1	0	0	1	0	1	0	0	FALSE	FALSE	TRUE	FALSE	FALSE	TRUE
100	112	84	28	99	100	99	1	18	35	1	34	76	118	37	81	60	0	0	0	2	65000	1830	71	0	0.68	0	19.4094	0	0.947478	3.18333	2	1	0	0	0	1	0	0	FALSE	FALSE	TRUE	FALSE	FALSE	TRUE
82	101	60	41	96	100	93	7	14	38	1	37	49	89	39	50	120	0	0	0	2	125000	1860	36	1	0.75	0	36.1313	0	1.07575	2.4	2	0	0	0	0	1	0	0	FALSE	FALSE	TRUE	FALSE	FALSE	FALSE
64	104	59	45	100	100	100	0	13	28	1	27	87	115	75	40	52	0	0	0	2	69000	1690	46	0	0.36	0	24.1588	0	0.960085	1.26333	NA	NA	NA	NA	NA	NA	0	0	NA	FALSE	FALSE	FALSE	FALSE	TRUE
85	94	74	20	100	100	100	0	17	25	1	24	68	77	64	13	50	0	0	0	2	85000	1800	72	0	0.5	0	26.2346	0	0.96724	2.71667	1	0	0	0	0	0	0	0	FALSE	FALSE	FALSE	FALSE	FALSE	FALSE
74	85	60	25	97	100	95	5	16	22	1	21	97	106	81	25	50	0	0	0	2	90000	1680	70	0	0.3	0	31.8878	0	0.981747	1.56667	1	0	0	1	0	0	0	0	FALSE	FALSE	FALSE	FALSE	FALSE	TRUE
87	109	82	27	99	100	99	1	14	25	1	24	52	59	45	14	50	0	0	0	2	81000	1780	70	0	0.41	0	25.565	0	0.964821	2.53	1	1	0	0	0	0	0	0	FALSE	FALSE	TRUE	FALSE	FALSE	FALSE
66	74	57	17	99	100	95	5	21	29	1	28	58	65	48	17	50	0	0	0	2	55000	1710	22	0	0.54	0	18.8092	1	1.06389	1.95333	1	0	0	0	0	0	0	0	FALSE	FALSE	TRUE	FALSE	FALSE	FALSE
89	105	74	31	99	100	97	3	21	32	17	15	52	64	45	19	40	0	0	0	2	104000	1790	22	0	0.26	0	32.4584	0	1.00038	3.29667	1	0	0	0	0	0	0	0	FALSE	FALSE	TRUE	FALSE	FALSE	FALSE
82	103	60	43	99	100	99	1	13	29	2	27	91	100	85	15	50	0	0	0	1	90000	1750	51	0	0.48	0	29.3878	0	0.972562	3.8	2	0	0	0	0	0	0	0	FALSE	FALSE	FALSE	FALSE	FALSE	FALSE
67	75	63	12	99	100	82	18	20	32	1	31	82	119	68	51	50	0	0	0	2	50000	1600	88	0	0.47	0	19.5312	1	0.927355	1.28333	3	0	0	0	0	0	0	0	TRUE	TRUE	FALSE	FALSE	FALSE	TRUE
59	71	42	29	99	100	88	12	14	30	1	29	67	69	66	3	50	0	0	0	1	53000	1670	52	0	0.52	0	19.0039	1	0.96508	1.95333	2	0	0	0	0	0	1	0	FALSE	TRUE	FALSE	TRUE	FALSE	FALSE
65	72	58	14	99	100	99	1	7	40	1	39	92	129	80	49	50	0	0	0	3	100000	1800	71	0	0.43	0	30.8642	0	0.958586	1.51667	2	0	0	0	0	0	1	0	FALSE	FALSE	FALSE	FALSE	FALSE	TRUE
75	85	53	32	98	100	84	16	19	34	1	33	82	86	79	7	50	0	0	0	2	52000	1540	50	0	0.42	0	21.9261	0	0.961362	2.7	1	0	0	0	0	0	1	0	FALSE	TRUE	FALSE	FALSE	FALSE	FALSE
79	93	72	21	99	100	91	9	17	33	1	32	78	87	64	23	50	0	0	0	2	70000	1600	66	1	0.65	0	27.3438	1	0.988394	2.63333	2	1	0	0	0	0	1	0	FALSE	FALSE	FALSE	FALSE	FALSE	FALSE
89	110	69	41	99	100	98	2	23	57	1	56	76	89	67	22	100	0	0	0	2	60000	1700	69	0	0.8	0	20.7612	0	0.9523	1.4	2	0	0	0	0	0	1	0	FALSE	FALSE	FALSE	FALSE	FALSE	FALSE
69	95	58	37	99	100	94	6	11	33	1	32	51	138	39	99	50	0	0	0.5	2	85000	1700	63	1	1	2	29.4118	0	0.293584	3.44667	1	0	0	0	0	1	0	0	FALSE	FALSE	TRUE	FALSE	FALSE	TRUE
58	76	39	37	99	100	98	2	26	46	1	45	64	89	48	41	50	0	0	0	2	51000	1600	38	0	0.41	0	19.9219	0	0.97291	2.34667	1	0	0	0	0	1	0	0	FALSE	FALSE	TRUE	TRUE	FALSE	FALSE
75	91	67	24	98	100	97	3	13	35	1	34	57	72	47	25	40	0	0	0.5	1	82000	1850	41	1	0.52	2	23.9591	1	0.40182	1.88667	1	1	0	0	0	0	0	0	FALSE	FALSE	TRUE	FALSE	FALSE	FALSE
50	64	41	23	99	100	96	4	12	46	1	45	56	75	43	32	30	0	0	0	2	55000	1650	67	1	0.44	0	20.202	0	1.02861	2.05333	1	0	1	0	0	0	0	0	FALSE	FALSE	TRUE	TRUE	FALSE	FALSE
94	101	69	32	97	100	93	7	16	31	2	29	75	89	66	23	25	0	0	0	3	58000	1610	53	0	0.48	0	22.3757	0	0.967367	3.16667	2	1	0	0	0	0	1	0	FALSE	FALSE	FALSE	FALSE	FALSE	FALSE
79	102	66	36	99	100	82	18	22	33	2	31	60	136	38	98	45	0	0	0	2	70000	17560	83	0	1.81	0	0.227012	0	0.911888	3.18	1	0	0	1	0	0	1	0	FALSE	TRUE	TRUE	FALSE	FALSE	TRUE
70	91	60	31	99	100	99	1	15	32	2	30	72	84	62	22	30	0	0	0	2	55000	1540	41	0	0.65	0	23.1911	1	1.02378	3.05333	1	0	0	0	0	0	0	0	FALSE	FALSE	FALSE	FALSE	FALSE	FALSE
65	77	58	19	99	100	96	4	15	30	2	28	64	140	52	88	60	0	0	0	2	97000	1810	69	0	0.77	0	29.6084	0	1.01546	2.18333	2	0	0	1	1	0	0	0	FALSE	FALSE	TRUE	FALSE	FALSE	TRUE
93	131	84	47	100	100	100	0	15	27	2	25	79	164	50	114	40	0	0	0	2	84000	1600	35	0	0.44	0	32.8125	1	1.0207	2.17	2	0	0	1	0	0	0	0	FALSE	FALSE	TRUE	FALSE	TRUE	TRUE
67	81	62	19	100	100	100	0	13	30	1	29	89	100	79	21	30	0	3	0	2	77000	1700	59	0	0.25	1	26.6436	1	0.83848	2.01667	2	1	0	0	0	0	0	0	FALSE	FALSE	FALSE	FALSE	FALSE	FALSE
60	67	55	12	100	100	100	0	15	38	1	37	74	100	66	34	50	0	0	0	2	63000	1620	39	1	0.6	0	24.0055	0	0.97684	2.56333	1	0	0	0	1	0	1	0	FALSE	FALSE	FALSE	FALSE	FALSE	FALSE
44	85	36	49	99	100	99	1	6	36	1	35	48	69	41	28	50	0	3	0	2	80000	1700	47	0	0.32	1	27.6817	0	1.10263	1.15333	2	1	0	0	0	1	0	0	FALSE	FALSE	TRUE	TRUE	FALSE	FALSE
72	93	60	33	99	100	86	14	16	39	1	38	67	97	58	39	30	0	3	0	2	65000	1500	77	0	0.41	1	28.8889	1	1.04975	1.26333	NA	0	0	0	0	NA	1	0	NA	TRUE	FALSE	FALSE	FALSE	FALSE
86	99	74	25	99	100	98	2	13	21	1	20	74	74	74	0	35	0	0	0	2	87000	1760	67	1	0.45	0	28.0863	0	1.05345	1.92	1	1	0	0	0	0	0	0	FALSE	FALSE	FALSE	FALSE	FALSE	FALSE
65	77	53	24	100	100	100	0	11	30	1	29	64	75	48	27	25	0	0	0	2	100000	1680	64	0	0.27	0	35.4308	0	0.992647	3.21667	2	0	0	0	0	0	0	0	FALSE	FALSE	TRUE	FALSE	FALSE	FALSE
60	76	56	20	99	100	96	4	15	22	1	21	91	102	85	17	49	0	0	0	3	63000	1690	44	0	0.52	0	22.0581	0	0.983717	2.62	2	0	0	0	0	0	0	0	FALSE	FALSE	FALSE	FALSE	FALSE	FALSE
67	75	54	21	99	100	98	2	16	24	4	20	88	119	76	43	30	0	0	0	2	88000	1730	62	0	0.64	0	29.4029	0	0.977907	4.77	1	0	0	0	0	0	1	1	FALSE	FALSE	FALSE	FALSE	FALSE	TRUE
85	111	64	47	100	100	100	0	16	35	1	34	97	115	87	28	40	0	0	0	2	64000	1650	73	0	0.43	0	23.5078	1	0.961643	3.88	1	1	0	0	0	0	0	0	FALSE	FALSE	FALSE	FALSE	FALSE	TRUE
80	94	73	21	99	100	76	24	15	27	2	25	66	67	65	2	30	0	0	0	2	74000	1690	69	0	0.29	0	25.9095	0	0.965839	1.18667	2	0	0	0	0	0	0	0	FALSE	TRUE	FALSE	FALSE	FALSE	FALSE
86	115	72	43	100	100	99	1	19	55	2	53	96	133	71	62	40	0	0	0	2	61000	1580	77	0	0.73	0	24.4352	1	0.944759	1.83	NA	NA	NA	NA	NA	NA	0	0	NA	FALSE	FALSE	FALSE	FALSE	TRUE
82	96	75	21	100	100	100	0	15	35	2	33	80	111	64	47	25	0	0	0	2	69000	1680	72	0	0.42	0	24.4473	0	0.961341	1.78333	2	1	0	0	0	0	1	0	FALSE	FALSE	FALSE	FALSE	FALSE	TRUE
67	98	56	42	99	100	72	28	10	50	2	48	69	83	57	26	30	0	0	0	2	45000	1500	62	1	0.58	0	20	1	0.975581	2.31333	2	0	0	0	0	0	1	0	FALSE	TRUE	FALSE	FALSE	FALSE	FALSE
84	97	77	20	100	100	100	0	15	30	2	28	103	133	88	45	30	0	0	0	2	50000	1600	56	0	0.47	0	19.5312	1	0.99447	1.61667	2	1	0	0	0	0	1	0	FALSE	FALSE	FALSE	FALSE	FALSE	TRUE
71	82	69	13	99	100	68	32	18	38	2	36	91	102	80	22	30	0	0	0	2	50000	1680	75	0	0.46	0	17.7154	1	0.934957	1.71333	3	0	0	0	0	0	1	0	TRUE	TRUE	FALSE	FALSE	FALSE	FALSE
57	72	52	20	99	100	99	1	10	31	2	29	85	101	71	30	30	0	0	0	2	69000	1800	68	0	0.45	0	21.2963	0	0.954463	1.74667	1	0	0	0	0	0	1	0	FALSE	FALSE	FALSE	FALSE	FALSE	FALSE
70	124	48	76	99	100	99	1	13	33	1	32	74	92	59	33	50	0	5	0	2	66000	1730	35	0	0.34	1	22.0522	1	0.723746	2.25333	1	1	0	0	0	0	0	0	FALSE	FALSE	FALSE	TRUE	TRUE	FALSE
72	81	59	22	100	100	100	0	12	55	1	54	73	84	67	17	40	0	3	0	2	85000	1740	51	0	0.72	1	28.075	1	0.839561	1.53333	1	0	0	0	0	0	0	0	FALSE	FALSE	FALSE	FALSE	FALSE	FALSE
62	72	57	15	99	100	95	5	7	21	1	20	58	79	51	28	50	0	0	0	2	89000	1750	69	1	0.43	0	29.0612	0	1.05254	3.31333	2	1	0	0	0	0	0	0	FALSE	FALSE	TRUE	FALSE	FALSE	FALSE
68	85	64	21	100	100	100	0	12	22	1	21	71	85	60	25	50	0	0	0	2	85000	1860	38	0	0.3	0	24.5693	0	0.979126	2.80333	1	0	0	0	0	0	0	0	FALSE	FALSE	FALSE	FALSE	FALSE	FALSE
65	82	60	22	100	100	100	0	15	20	1	19	85	104	73	31	50	0	0	0	2	70000	1750	55	0	0.57	0	22.8571	1	1.002	2.83333	2	1	0	0	0	0	0	0	FALSE	FALSE	FALSE	FALSE	FALSE	FALSE
65	74	55	19	100	100	100	0	14	41	1	40	53	72	45	27	40	0	0	0	1	77000	1740	64	0	0.28	0	25.4327	0	0.991994	2.59667	2	1	0	0	0	0	0	0	FALSE	FALSE	TRUE	FALSE	FALSE	FALSE
65	92	49	43	99	100	98	2	13	35	1	34	59	112	43	69	100	0	0	0	1	69000	1670	59	0	0.8	0	24.7409	1	0.951343	1.75	1	0	0	0	0	NA	0	0	FALSE	FALSE	TRUE	TRUE	FALSE	TRUE
105	117	100	17	99	100	96	4	23	35	1	34	89	104	80	24	20	50	0	0	2	66000	1810	54	1	0.34	3	20.1459	1	1.46414	0.82	4	1	0	0	0	0	0	0	TRUE	FALSE	FALSE	FALSE	FALSE	FALSE
72	81	66	15	100	100	100	0	15	30	1	29	69	116	56	60	10	25	0	0	2	114000	1700	85	0	0.71	3	39.4464	0	0.906178	1.13	2	0	0	0	0	0	1	0	FALSE	FALSE	FALSE	FALSE	FALSE	TRUE
79	101	72	29	99	100	97	3	11	22	1	21	59	72	49	23	60	0	0	0	2	117000	1780	72	0	0.77	0	36.9272	0	1.0043	2.43333	3	1	0	0	0	0	0	1	TRUE	FALSE	TRUE	FALSE	FALSE	FALSE
94	114	80	34	99	100	97	3	20	32	1	31	56	83	41	42	40	0	0	0	2	53000	1600	85	0	0.65	0	20.7031	1	0.930484	2.15	4	0	0	0	0	0	1	1	TRUE	FALSE	TRUE	FALSE	FALSE	FALSE
51	71	44	27	99	100	99	1	13	45	1	44	84	103	73	30	30	0	0	0	2	66000	1680	77	1	0.5	0	23.3844	0	1.02029	2.05	1	0	1	0	0	0	0	0	FALSE	FALSE	FALSE	TRUE	FALSE	FALSE
67	88	58	30	99	100	95	5	11	32	1	31	69	91	56	35	45	0	0	0	3	64000	1650	76	0	0.72	0	23.5078	1	1.02763	0.933333	1	1	0	0	0	0	0	0	FALSE	FALSE	FALSE	FALSE	FALSE	FALSE
59	77	41	36	99	100	99	1	12	33	1	32	70	97	56	41	40	0	0	0	2	90000	1780	72	1	0.9	0	28.4055	1	0.982268	1.62	2	1	0	0	0	0	0	0	FALSE	FALSE	FALSE	TRUE	FALSE	FALSE
52	70	47	23	100	100	100	0	10	16	2	14	75	148	55	93	50	0	0	0	2	91000	1690	87	0	0.58	0	31.8616	0	0.97042	2.39667	2	1	0	0	0	0	0	0	FALSE	FALSE	TRUE	TRUE	FALSE	TRUE
76	102	69	33	99	100	96	4	10	44	1	43	78	117	59	58	60	0	0	0	2	68000	1770	76	1	0.93	0	21.7051	1	0.963967	1.54667	2	1	0	0	0	0	1	0	FALSE	FALSE	FALSE	FALSE	FALSE	TRUE
76	86	70	16	98	100	92	8	16	35	1	34	40	52	30	22	30	0	0	0	2	53000	1670	66	0	0.47	0	19.0039	1	0.974645	3.5	1	1	0	1	0	1	0	0	FALSE	FALSE	TRUE	FALSE	FALSE	FALSE
76	97	67	30	100	100	100	0	18	29	2	27	68	82	58	24	50	0	0	0	2	50000	1600	32	1	0.43	0	19.5312	1	1.02927	2.93	NA	0	0	1	0	0	0	0	NA	FALSE	FALSE	FALSE	FALSE	FALSE
75	96	63	33	99	100	98	2	19	43	5	38	112	170	72	98	46	0	0	0	1	55000	1870	20	1	0.54	0	15.7282	0	1.06197	2.80333	2	0	0	0	0	0	0	0	FALSE	FALSE	FALSE	FALSE	FALSE	TRUE
61	75	53	22	99	100	99	1	14	32	3	29	72	97	57	40	20	0	0	0	2	55000	1670	87	1	0.55	0	19.721	0	0.985773	1.80333	1	1	0	0	0	0	0	0	FALSE	FALSE	FALSE	FALSE	FALSE	FALSE
105	124	93	31	99	100	89	11	8	25	1	24	83	101	61	40	54	0	0	0	2	73000	1650	65	1	1.23	0	26.8136	1	1.10646	2.08333	NA	NA	NA	NA	NA	NA	0	0	NA	TRUE	FALSE	FALSE	TRUE	FALSE
78	93	62	31	99	100	96	4	16	23	1	22	86	99	73	26	50	0	0	0	2	65000	1600	66	0	0.58	0	25.3906	1	0.980152	2.38333	2	0	0	1	0	0	0	1	FALSE	FALSE	FALSE	FALSE	FALSE	FALSE
77	97	71	26	99	100	99	1	14	41	1	40	87	96	72	24	50	0	0	0	1	85000	1700	58	1	0.44	0	29.4118	0	1.04231	4.98667	2	1	0	0	0	0	1	1	FALSE	FALSE	FALSE	FALSE	FALSE	FALSE
72	79	69	10	99	100	95	5	18	34	2	32	87	104	72	32	50	0	0	0	3	59000	1600	73	1	0.47	0	23.0469	1	1.03514	1.42	2	0	0	1	0	0	1	0	FALSE	FALSE	FALSE	FALSE	FALSE	FALSE
107	119	80	39	85	95	63	32	20	68	1	67	49	78	24	54	50	0	0	0	2	112000	16980	63	1	0.57	0	0.388457	0	0.976835	5.26667	1	0	0	1	0	NA	0	1	FALSE	TRUE	TRUE	FALSE	FALSE	FALSE
81	89	80	9	99	100	96	4	22	63	1	62	88	99	71	28	50	0	0	0	2	112000	1690	69	0	0.35	0	39.2143	0	1.00392	3	4	1	0	0	0	0	1	0	TRUE	FALSE	FALSE	FALSE	FALSE	FALSE
108	129	82	47	99	100	80	20	17	41	1	40	90	118	77	41	50	0	0	0	1	85000	720	85	0	0.54	0	163.966	0	0.966604	1.82	2	1	1	1	0	0	1	1	FALSE	TRUE	FALSE	FALSE	TRUE	TRUE
72	113	51	62	100	100	100	0	20	35	1	34	102	126	83	43	50	0	0	0	2	67000	1640	56	0	0.3	0	24.9108	1	1.00439	1.93667	1	1	0	0	0	0	1	0	FALSE	FALSE	FALSE	FALSE	FALSE	TRUE
81	94	76	18	99	100	98	2	13	27	2	25	83	92	71	21	50	0	0	0	2	72000	1500	63	0	0.4	0	32	1	0.98585	1.85	4	1	0	0	0	0	1	0	TRUE	FALSE	FALSE	FALSE	FALSE	FALSE
90	99	71	28	99	100	97	3	21	29	3	26	91	100	81	19	50	0	0	0	2	93000	1630	45	0	0.3	0	35.0032	1	1.00304	2.66667	1	0	0	0	0	0	1	0	FALSE	FALSE	FALSE	FALSE	FALSE	FALSE
71	90	60	30	97	100	83	17	22	46	2	44	88	111	71	40	50	0	0	0	2	66000	1560	52	1	0.39	0	27.1203	1	1.00291	2.28667	1	0	0	1	0	0	1	0	FALSE	TRUE	FALSE	FALSE	FALSE	TRUE
98	116	75	41	100	100	100	0	19	44	2	42	70	76	63	13	50	0	0	0	2	80000	1600	24	1	0.38	0	31.25	1	1.0021	1.81667	1	0	0	0	0	0	1	0	FALSE	FALSE	FALSE	FALSE	FALSE	FALSE
73	102	64	38	99	100	98	2	12	31	1	30	82	94	67	27	40	0	0	0	2	71000	1550	70	0	0.78	0	29.5525	1	0.967076	2.99667	3	1	0	0	0	0	0	0	TRUE	FALSE	FALSE	FALSE	FALSE	FALSE
66	75	62	13	100	100	100	0	21	28	1	27	64	73	51	22	40	0	0	0	2	89000	1730	72	0	0.55	0	29.737	1	0.970222	0.97	2	0	0	1	0	0	0	0	FALSE	FALSE	TRUE	FALSE	FALSE	FALSE
69	92	60	32	99	100	99	1	16	26	1	25	54	66	48	18	50	0	0	0	2	70000	1760	48	0	0.54	0	22.5981	0	0.96416	3.83667	1	0	0	0	0	0	0	0	FALSE	FALSE	TRUE	FALSE	FALSE	FALSE
88	103	83	20	100	100	100	0	19	29	11	18	83	97	69	28	50	0	0	0	2	69000	1700	37	0	0.46	0	23.8754	1	1.03137	3.11333	1	0	0	0	0	1	0	0	FALSE	FALSE	FALSE	FALSE	FALSE	FALSE
87	115	68	47	100	100	100	0	21	31	2	29	78	98	70	28	80	0	0	0	2	55000	1580	31	0	0.6	0	22.0317	1	1.04403	2.65333	1	0	0	0	0	1	0	0	FALSE	FALSE	FALSE	FALSE	FALSE	FALSE
76	91	69	22	100	100	100	0	12	19	7	12	96	96	96	0	50	0	0	0	2	76000	1730	32	0	0.44	0	25.3934	0	0.992753	2.17	1	0	0	0	0	0	0	0	FALSE	FALSE	FALSE	FALSE	FALSE	FALSE
110	138	82	56	99	100	95	5	16	32	2	30	57	68	37	31	80	0	0	0	2	60000	1600	24	1	0.64	0	23.4375	0	1.10691	2.37	2	0	0	0	0	0	0	0	FALSE	FALSE	TRUE	FALSE	TRUE	FALSE
77	98	52	46	99	100	96	4	19	30	1	29	79	116	57	59	100	0	0	0	2	59000	1590	56	1	0.6	0	23.3377	1	0.992248	2.3	2	0	0	0	0	0	0	0	FALSE	FALSE	FALSE	FALSE	FALSE	TRUE
86	114	74	40	99	100	91	9	9	29	1	28	82	102	69	33	30	0	0	0	2	71000	1760	66	1	0.43	0	22.921	0	1.12866	2.75	3	0	1	1	0	0	0	0	TRUE	FALSE	FALSE	FALSE	FALSE	FALSE
69	79	62	17	99	100	97	3	11	27	1	26	78	91	64	27	45	20	0	0	2	76000	1670	64	0	0.53	3	27.2509	0	0.996244	1.4	1	1	0	0	0	0	1	0	FALSE	FALSE	FALSE	FALSE	FALSE	FALSE
98	120	79	41	99	100	94	6	20	39	1	38	94	102	81	21	35	20	0	0	3	68000	1800	68	0	0.48	3	20.9877	1	0.967671	1.31333	2	1	0	0	0	0	1	0	FALSE	FALSE	FALSE	FALSE	TRUE	FALSE
71	80	65	15	99	100	99	1	19	28	2	26	72	89	59	30	40	0	0	0	2	87000	1750	56	0	0.25	0	28.4082	1	1.00473	3.83333	2	0	0	0	0	0	0	0	FALSE	FALSE	FALSE	FALSE	FALSE	FALSE
67	80	61	19	100	100	100	0	20	36	2	34	67	78	57	21	30	0	0	0	2	95000	1600	51	0	0.25	0	37.1094	1	0.996707	2.75	1	0	0	0	0	0	0	0	FALSE	FALSE	FALSE	FALSE	FALSE	FALSE
70	94	44	50	99	100	97	3	20	34	3	31	97	127	78	49	60	0	0	0	3	88000	1690	74	1	0.55	0	30.8112	1	1.06023	2.63333	1	1	0	0	0	0	1	1	FALSE	FALSE	FALSE	TRUE	FALSE	TRUE
73	95	51	44	99	100	99	1	12	26	2	24	82	141	48	93	50	0	0	0	1	48000	1690	34	1	0.37	0	16.8061	0	1.05133	1.58667	2	0	0	0	0	1	1	0	FALSE	FALSE	TRUE	FALSE	FALSE	TRUE
77	85	72	13	99	100	98	2	16	23	3	20	54	75	47	28	40	0	0	0	1	87000	1780	54	0	0.38	0	27.4587	0	0.977873	3.39667	2	0	0	0	0	1	0	1	FALSE	FALSE	TRUE	FALSE	FALSE	FALSE
75	101	69	32	99	100	98	2	17	26	2	24	81	98	68	30	50	0	0	0	2	82000	1760	51	0	0.69	0	26.4721	0	0.971031	2.48667	2	0	0	0	0	0	0	0	FALSE	FALSE	FALSE	FALSE	FALSE	FALSE
82	100	67	33	99	100	99	1	18	22	2	20	63	87	50	37	50	0	0	0	2	63000	1760	50	0	0.61	0	20.3383	0	0.958812	2.44667	2	0	0	1	0	0	0	0	FALSE	FALSE	TRUE	FALSE	FALSE	FALSE
59	113	51	62	99	100	96	4	11	28	2	26	60	98	48	50	50	0	0	0	2	54000	1630	33	1	0.87	0	20.3244	1	1.02665	4.70333	1	0	0	0	0	0	0	0	FALSE	FALSE	TRUE	FALSE	FALSE	FALSE
77	95	57	38	99	100	94	6	10	22	1	21	73	99	63	36	100	0	0	0	2	75000	1700	67	0	1	0	25.9516	0	0.966241	3.72	2	0	0	1	0	1	0	1	FALSE	FALSE	FALSE	FALSE	FALSE	FALSE
84	104	53	51	99	100	94	6	15	43	2	41	66	101	54	47	50	0	0	0	2	67000	1570	53	1	0.78	0	27.1816	1	0.930728	2.71667	NA	0	0	0	1	1	0	0	NA	FALSE	TRUE	FALSE	FALSE	FALSE
57	70	50	20	99	100	96	4	24	40	2	38	69	87	40	47	50	0	0	0	1	84000	1700	68	0	0.49	0	29.0657	0	0.985748	1.08667	1	1	0	0	0	0	0	0	FALSE	FALSE	TRUE	TRUE	FALSE	FALSE
84	101	70	31	99	100	96	4	15	28	2	26	88	101	75	26	50	0	0	0	2	109000	1870	57	0	0.48	0	31.1705	1	1.00189	2.11667	NA	0	0	0	0	0	1	0	NA	FALSE	FALSE	FALSE	FALSE	FALSE
67	82	53	29	98	100	85	15	8	25	2	23	80	112	64	48	50	0	0	0	2	70000	1600	49	0	0.39	0	27.3438	1	1.0098	1.88667	2	0	0	0	0	1	1	0	FALSE	TRUE	FALSE	FALSE	FALSE	TRUE
69	74	61	13	99	100	95	5	9	22	1	21	78	97	69	28	50	0	0	0	2	71000	1710	57	0	0.52	0	24.281	0	0.963597	2.52	1	0	0	0	0	0	0	0	FALSE	FALSE	FALSE	FALSE	FALSE	FALSE
53	80	46	34	100	100	100	0	16	24	1	23	73	88	64	24	40	0	0	0	2	59000	1630	36	0	0.62	0	22.2063	1	1.0082	2.46667	3	1	0	0	0	0	0	0	TRUE	FALSE	FALSE	TRUE	FALSE	FALSE
81	95	68	27	96	100	68	32	18	40	1	39	88	112	71	41	100	0	0	0	2	94000	1660	57	1	0.69	0	34.1124	1	1.23936	2.05333	3	0	0	0	0	0	1	0	TRUE	TRUE	FALSE	FALSE	FALSE	TRUE
81	91	55	36	99	100	82	18	11	23	2	21	88	112	78	34	110	0	0	0	3	111000	1740	60	0	0.66	0	36.6627	0	1.00134	2.11333	1	0	0	0	0	0	1	0	FALSE	TRUE	FALSE	FALSE	FALSE	TRUE
63	75	55	20	99	100	94	6	12	48	2	46	60	78	48	30	50	0	0	0	1	61000	1660	88	1	0.78	0	22.1367	0	0.943341	1.8	1	0	0	0	0	0	0	0	FALSE	FALSE	TRUE	FALSE	FALSE	FALSE
83	100	66	34	99	100	96	4	13	27	2	25	64	80	53	27	50	0	0	0	1	61000	1700	55	0	0.56	0	21.1073	1	0.959103	1.74667	1	0	0	0	0	0	0	0	FALSE	FALSE	TRUE	FALSE	FALSE	FALSE
61	67	52	15	100	100	100	0	15	40	2	38	65	74	59	15	45	0	0	0	2	92000	1700	67	0	0.28	0	31.8339	0	0.983185	2.74667	3	1	0	0	0	0	1	0	TRUE	FALSE	FALSE	FALSE	FALSE	FALSE
62	77	60	17	100	100	100	0	16	21	2	19	50	53	47	6	40	0	0	0	2	80000	1800	49	0	0.34	0	24.6914	0	0.967535	2.67	2	0	0	0	0	0	0	0	FALSE	FALSE	TRUE	FALSE	FALSE	FALSE
68	100	56	44	100	100	100	0	15	25	1	24	76	86	66	20	30	0	0	0	2	102000	1800	60	0	0.35	0	31.4815	1	0.995826	2.13	2	0	0	0	0	0	0	0	FALSE	FALSE	FALSE	FALSE	FALSE	FALSE
84	107	78	29	99	100	97	3	12	26	2	24	82	85	78	7	35	0	0	0	2	60000	1680	48	0	0.25	0	21.2585	0	0.940916	0.963333	3	0	0	0	0	1	0	0	TRUE	FALSE	FALSE	FALSE	FALSE	FALSE
75	99	58	41	97	100	93	7	13	29	2	27	68	77	58	19	40	0	0	0.5	2	121000	1730	34	1	0.35	2	40.429	0	0.274471	2.34667	1	0	0	0	0	0	1	0	FALSE	FALSE	FALSE	FALSE	FALSE	FALSE
56	70	48	22	99	100	95	5	15	44	2	42	86	99	72	27	30	0	0	0	2	47000	630	64	1	0.47	0	118.418	1	0.959694	2.92	2	0	0	0	0	1	0	0	FALSE	FALSE	FALSE	TRUE	FALSE	FALSE
71	82	63	19	99	100	99	1	18	28	2	26	73	92	58	34	50	0	0	0	2	54000	1620	65	0	0.4	0	20.5761	1	0.978208	2.55	2	0	0	0	0	1	0	1	FALSE	FALSE	FALSE	FALSE	FALSE	FALSE
56	71	51	20	100	100	100	0	18	26	1	25	57	81	42	39	34	0	0	0	2	73000	1730	75	0	0.35	0	24.3911	0	1.03131	2.78667	3	1	0	0	1	0	0	1	TRUE	FALSE	TRUE	FALSE	FALSE	FALSE
78	105	72	33	99	100	99	1	7	22	2	20	66	97	58	39	50	0	0	0	2	64000	1650	60	0	0.45	0	23.5078	1	0.994175	1.69667	1	0	0	0	0	0	0	0	FALSE	FALSE	FALSE	FALSE	FALSE	FALSE
67	98	60	38	99	100	99	1	25	32	2	30	72	152	47	105	30	0	0	0	2	74000	1780	81	0	0.62	0	23.3556	1	0.942738	1.15333	2	1	0	0	0	NA	0	1	FALSE	FALSE	TRUE	FALSE	FALSE	TRUE
87	104	78	26	99	100	76	24	8	24	1	23	76	101	55	46	50	0	0	0	2	120000	1600	58	0	0.37	0	46.875	1	1.00423	3.35	2	0	0	0	0	0	0	0	FALSE	TRUE	TRUE	FALSE	FALSE	FALSE
59	86	53	33	100	100	100	0	16	36	1	35	65	92	56	36	80	0	0	0	2	70000	1760	52	1	1.4	0	22.5981	1	0.994361	2.79667	1	0	0	0	0	0	1	1	FALSE	FALSE	FALSE	FALSE	FALSE	FALSE
85	110	73	37	99	100	99	1	19	24	6	18	76	91	71	20	40	0	0	0	2	84000	1760	51	0	0.25	0	27.1178	0	1.01949	1.26667	3	0	0	0	1	0	1	0	TRUE	FALSE	FALSE	FALSE	FALSE	FALSE
63	79	58	21	97	100	92	8	13	32	2	30	54	69	44	25	40	0	0	0	2	77000	1700	59	1	0.52	0	26.6436	0	1.06004	1.48667	2	0	0	1	0	0	1	1	FALSE	FALSE	TRUE	FALSE	FALSE	FALSE
59	69	54	15	99	100	94	6	16	31	1	30	58	68	48	20	30	0	0	0	2	70000	1760	78	0	0.35	0	22.5981	1	0.94906	1.46667	1	1	1	1	0	0	1	0	FALSE	FALSE	TRUE	FALSE	FALSE	FALSE
78	87	69	18	100	100	100	0	11	38	1	37	103	132	82	50	40	0	0	0	2	86000	1710	75	1	0.45	0	29.4108	1	0.980235	1.90333	2	0	0	0	0	0	1	0	FALSE	FALSE	FALSE	FALSE	FALSE	TRUE
75	86	66	20	100	100	100	0	14	32	1	31	89	97	85	12	50	0	3	0	2	73000	1780	50	0	0.37	1	23.04	1	0.79578	2.10333	2	0	0	0	0	0	1	0	FALSE	FALSE	FALSE	FALSE	FALSE	FALSE
81	90	69	21	99	100	97	3	17	31	1	30	106	112	100	12	25	0	0	0	2	107000	1730	70	0	0.62	0	35.7513	0	0.99088	1.25	1	0	0	0	0	0	0	0	FALSE	FALSE	FALSE	FALSE	FALSE	TRUE
73	91	68	23	100	100	100	0	13	34	1	33	82	94	76	18	35	0	0	0	2	92000	1770	52	1	0.46	0	29.3658	1	1.00064	4.83	1	0	0	0	0	0	0	0	FALSE	FALSE	FALSE	FALSE	FALSE	FALSE
79	98	67	31	99	100	98	2	16	21	1	20	104	121	89	32	30	0	0	0	3	55000	1570	80	0	0.44	0	22.3133	1	0.904714	3.43667	3	1	0	1	0	0	0	0	TRUE	FALSE	FALSE	FALSE	FALSE	TRUE
77	96	61	35	99	100	96	4	13	23	1	22	78	84	69	15	25	0	0	0	1	85000	1780	71	0	0.75	0	26.8274	0	1.00858	5.31667	4	1	0	0	0	0	0	0	TRUE	FALSE	FALSE	FALSE	FALSE	FALSE
74	84	67	17	99	100	98	2	14	35	1	34	61	70	49	21	40	0	0	0	2	64000	1680	77	0	0.82	0	22.6757	1	0.951634	3.07	1	0	0	0	0	NA	0	0	FALSE	FALSE	TRUE	FALSE	FALSE	FALSE
64	79	55	24	100	100	100	0	19	32	1	31	77	96	65	31	40	0	0	0	2	52000	1570	54	0	0.33	0	21.0962	1	0.999861	1.53333	2	0	0	0	0	0	0	0	FALSE	FALSE	FALSE	FALSE	FALSE	FALSE
60	70	53	17	99	100	93	7	13	24	1	23	67	79	58	21	35	0	0	0	1	98000	1700	55	0	0.42	0	33.91	1	0.949684	1.71667	1	0	0	0	0	0	1	0	FALSE	FALSE	FALSE	FALSE	FALSE	FALSE
91	102	75	27	99	100	95	5	16	27	1	26	91	117	77	40	60	0	0	0	2	86000	1750	64	0	0.65	0	28.0816	0	0.972774	1.74667	1	1	1	0	0	0	1	0	FALSE	FALSE	FALSE	FALSE	FALSE	TRUE
78	88	63	25	100	100	100	0	15	23	4	19	90	101	79	22	25	0	0	0	2	57000	1630	62	0	0.55	0	21.4536	1	0.986791	3.96667	2	0	0	0	0	1	0	0	FALSE	FALSE	FALSE	FALSE	FALSE	FALSE
80	121	71	50	100	100	100	0	16	36	1	35	54	77	41	36	10	0	0	0	2	57000	1650	39	1	0.65	0	20.9366	1	1.01508	1.31333	2	0	0	0	0	0	0	0	FALSE	FALSE	TRUE	FALSE	TRUE	FALSE
63	81	54	27	97	100	92	8	13	32	1	31	70	106	56	50	70	0	0	0	2	100000	1810	62	0	0.7	0	30.5241	0	0.982778	3.53667	1	1	0	0	0	0	0	0	FALSE	FALSE	FALSE	FALSE	FALSE	TRUE
74	84	69	15	100	100	100	0	17	23	2	21	79	87	75	12	50	0	0	0	2	70000	1600	63	0	0.3	0	27.3438	1	0.973209	2.66667	3	1	1	0	0	0	0	0	TRUE	FALSE	FALSE	FALSE	FALSE	FALSE
72	80	56	24	100	100	100	0	16	34	1	33	65	84	57	27	50	0	0	0	3	70000	1690	53	0	0.51	0	24.5089	1	1.09976	2.29667	2	0	0	0	0	0	0	0	FALSE	FALSE	FALSE	FALSE	FALSE	FALSE
59	76	54	22	100	100	100	0	15	31	1	30	59	70	49	21	50	0	0	0	2	100000	1600	68	0	0.7	0	39.0625	1	0.997217	3.23333	3	1	0	0	0	0	0	1	TRUE	FALSE	TRUE	FALSE	FALSE	FALSE
70	85	51	34	96	98	90	8	15	43	1	42	75	135	47	88	50	0	0	0	2	70000	1600	54	1	0.8	0	27.3438	1	1.0029	2	2	1	0	0	0	1	0	0	FALSE	TRUE	TRUE	FALSE	FALSE	TRUE
74	86	69	17	99	100	97	3	2	3	2	1	75	80	70	10	40	0	0	0	3	74000	1650	43	0	0.2	0	27.1809	0	0.896164	1.58	3	1	0	1	0	0	1	0	TRUE	FALSE	FALSE	FALSE	FALSE	FALSE
53	71	49	22	98	100	87	13	12	28	1	27	61	77	45	32	150	0	3	0	2	75000	1680	75	1	1.33	1	26.5731	0	1.23981	3.58	NA	1	0	0	0	1	1	1	NA	TRUE	TRUE	TRUE	FALSE	FALSE
59	79	52	27	100	100	100	0	14	22	1	21	88	120	70	50	40	0	5	0	2	100000	1770	70	0	0.3	1	31.9193	0	0.993511	1.6	2	0	0	0	0	NA	1	0	FALSE	FALSE	FALSE	FALSE	FALSE	TRUE
62	110	56	54	100	100	100	0	8	18	1	17	80	96	70	26	40	0	3	0	3	97000	1710	45	0	0.28	1	33.1726	1	0.601566	3.86333	2	0	0	0	0	0	1	0	FALSE	FALSE	FALSE	FALSE	FALSE	FALSE
69	88	56	32	96	100	93	7	12	27	1	26	74	84	66	18	40	0	0	0.5	2	60000	1600	59	1	0.5	2	23.4375	1	0.430138	3.78	1	0	0	0	0	1	1	0	FALSE	FALSE	FALSE	FALSE	FALSE	FALSE
74	91	49	42	99	100	95	5	11	27	1	26	81	100	60	40	50	0	0	0	2	98000	1720	55	1	0.5	0	33.126	1	0.997613	2.89667	1	0	0	0	0	0	1	0	FALSE	FALSE	FALSE	TRUE	FALSE	FALSE
65	69	61	8	99	100	98	2	16	41	2	39	72	84	59	25	35	0	0	0	2	84000	1720	79	0	0.47	0	28.3937	0	0.970793	1.75	1	0	0	0	0	0	0	0	FALSE	FALSE	FALSE	FALSE	FALSE	FALSE
46	56	40	16	100	100	100	0	14	23	2	21	73	92	63	29	20	0	0	0	3	70000	1700	56	0	0.26	0	24.2215	0	0.966033	2.06333	1	0	0	0	0	0	0	0	FALSE	FALSE	FALSE	TRUE	FALSE	FALSE
56	65	53	12	99	100	91	9	11	26	2	24	70	74	67	7	25	0	0	0	2	65000	1550	58	0	0.32	0	27.0552	1	1.00262	2.1	2	0	0	1	0	0	0	0	FALSE	FALSE	FALSE	FALSE	FALSE	FALSE
92	105	73	32	99	100	96	4	8	24	1	23	86	103	68	35	50	0	0	0	2	110000	1800	54	0	0.65	0	33.9506	0	1.01408	1.11667	3	1	0	0	1	1	0	0	TRUE	FALSE	FALSE	FALSE	FALSE	FALSE
72	84	62	22	99	100	95	5	9	29	1	28	74	91	60	31	50	0	0	0	2	60000	1650	60	1	0.55	0	22.0386	1	0.983932	2.74667	2	1	0	0	0	0	1	0	FALSE	FALSE	FALSE	FALSE	FALSE	FALSE
68	87	61	26	99	100	98	2	14	21	1	20	77	95	69	26	50	0	0	0	1	82000	1850	61	0	0.53	0	23.9591	0	0.99248	2.03	1	0	0	0	0	0	1	0	FALSE	FALSE	FALSE	FALSE	FALSE	FALSE
77	88	68	20	98	100	94	6	11	25	1	24	70	99	54	45	50	0	0	0	1	70000	1680	48	1	0.58	0	24.8016	1	0.993131	1.54667	2	0	0	1	0	0	1	0	FALSE	FALSE	TRUE	FALSE	FALSE	FALSE
70	87	60	27	100	100	100	0	14	48	2	46	62	132	45	87	70	0	0	0	2	49000	1590	52	0	0.85	0	19.3821	1	1.00074	3.85333	1	0	0	0	0	1	0	0	FALSE	FALSE	TRUE	FALSE	FALSE	TRUE
75	103	66	37	97	100	96	4	8	13	1	12	78	112	62	50	50	0	0	0	1	33000	1500	61	1	1.05	0	14.6667	1	0.945234	2.23	2	0	0	1	0	0	1	1	FALSE	FALSE	FALSE	FALSE	FALSE	TRUE
61	72	55	17	100	100	100	0	13	26	1	25	67	95	55	40	65	0	0	0	3	84000	1820	74	0	0.78	0	25.3593	0	0.94205	2.64667	1	1	0	0	0	0	0	1	FALSE	FALSE	TRUE	FALSE	FALSE	FALSE
68	87	55	32	98	100	95	5	14	54	4	50	70	87	52	35	30	0	0	0	2	52000	1530	61	1	0.53	0	22.2137	1	1.04976	1.54667	NA	NA	NA	NA	NA	NA	0	0	NA	FALSE	TRUE	FALSE	FALSE	FALSE
64	70	55	15	99	100	97	3	15	38	4	34	70	101	53	48	75	0	0	0	3	89000	1780	71	0	1.15	0	28.0899	0	0.950147	2.88667	2	0	1	0	0	0	0	0	FALSE	FALSE	TRUE	FALSE	FALSE	FALSE
78	91	70	21	99	100	95	5	25	36	2	34	70	92	60	32	40	0	0	0	2	84000	1780	62	0	0.57	0	26.5118	1	0.99239	1.27	1	1	0	1	0	0	0	0	FALSE	FALSE	FALSE	FALSE	FALSE	FALSE
69	76	64	12	99	100	99	1	15	32	1	31	72	96	57	39	50	0	0	0	3	95000	1730	70	0	0.4	0	31.7418	0	1.10929	2.46333	2	1	0	0	1	0	0	0	FALSE	FALSE	FALSE	FALSE	FALSE	FALSE
66	73	60	13	96	100	80	20	14	38	1	37	60	99	47	52	20	0	0	0	3	100000	1710	58	0	0.85	0	34.1986	1	1.14423	3.32	1	1	0	0	0	0	0	0	FALSE	TRUE	TRUE	FALSE	FALSE	FALSE
75	89	67	22	100	100	100	0	14	24	1	23	70	90	55	35	20	0	0	0	2	60000	1700	32	1	0.64	0	20.7612	1	1.02696	5.17	1	1	0	0	0	0	0	0	FALSE	FALSE	TRUE	FALSE	FALSE	FALSE
65	89	25	64	99	100	95	5	13	35	1	34	64	76	46	30	60	0	0	0	2	60000	1660	67	1	1.57	0	21.7738	1	0.975457	5.13333	1	1	0	0	0	0	1	1	FALSE	FALSE	TRUE	TRUE	FALSE	FALSE
83	95	78	17	99	100	99	1	18	33	1	32	76	83	67	16	40	0	0	0	2	70000	1600	74	0	0.5	0	27.3438	0	0.971779	2.85	1	0	0	0	0	0	0	0	FALSE	FALSE	FALSE	FALSE	FALSE	FALSE
82	102	53	49	98	100	95	5	7	35	1	34	61	147	48	99	20	0	0	0	1	80000	1630	73	1	0.89	0	30.1103	1	0.965866	3.23667	1	0	0	0	0	0	0	0	FALSE	FALSE	TRUE	FALSE	FALSE	TRUE
81	92	60	32	98	100	96	4	15	21	1	20	79	111	61	50	160	0	0	0	2	84000	1750	54	1	0.72	0	27.4286	0	1.06997	2.97	1	0	0	0	0	0	0	0	FALSE	FALSE	FALSE	FALSE	FALSE	TRUE
67	89	54	35	99	100	99	1	13	30	1	29	68	88	50	38	50	0	0	0	2	57000	1750	78	1	0.52	0	18.6122	0	1.078	1.50333	3	0	1	0	0	0	1	1	TRUE	FALSE	TRUE	FALSE	FALSE	FALSE
83	93	78	15	99	100	99	1	11	23	1	22	87	102	72	30	30	0	0	0	2	84000	1690	60	0	0.25	0	29.4107	0	0.977706	2.08667	2	1	0	0	0	0	0	1	FALSE	FALSE	FALSE	FALSE	FALSE	FALSE
80	98	65	33	100	100	100	0	16	25	2	23	84	94	73	21	40	0	0	0	2	52000	1630	67	0	0.41	0	19.5717	1	0.972538	2.86333	1	0	0	0	0	0	0	0	FALSE	FALSE	FALSE	FALSE	FALSE	FALSE
74	93	63	30	99	100	97	3	15	24	1	23	74	81	58	23	50	0	0	0	2	66000	1590	66	0	0.7	0	26.1066	1	0.963873	2.54667	3	1	0	0	0	0	0	0	TRUE	FALSE	FALSE	FALSE	FALSE	FALSE
78	100	64	36	99	100	95	5	14	25	1	24	83	121	64	57	10	0	0	0	2	70000	1660	58	1	0.71	0	25.4028	1	0.994724	2.53	2	1	0	1	0	0	0	1	FALSE	FALSE	FALSE	FALSE	FALSE	TRUE
83	151	58	93	99	100	97	3	15	29	1	28	79	100	62	38	10	0	0	0	2	74000	1690	72	0	0.43	0	25.9095	0	0.973945	2.28	3	1	0	0	0	0	1	1	TRUE	FALSE	FALSE	FALSE	TRUE	FALSE
84	103	68	35	100	100	100	0	21	31	2	29	73	81	66	15	90	0	0	0	1	90000	1820	46	0	0.59	0	27.1706	0	0.976317	2.75333	1	0	0	0	0	0	0	0	FALSE	FALSE	FALSE	FALSE	FALSE	FALSE
75	92	68	24	99	100	93	7	14	30	1	29	85	107	64	43	50	0	0	0	2	72000	1560	53	1	0.5	0	29.5858	1	1.0007	2.38333	2	1	0	0	0	0	0	0	FALSE	FALSE	FALSE	FALSE	FALSE	TRUE
76	93	68	25	96	99	94	5	14	29	2	27	56	78	46	32	20	0	0	0	2	90000	1780	63	1	0.57	0	28.4055	0	1.06097	2.32	1	1	0	0	0	0	0	0	FALSE	FALSE	TRUE	FALSE	FALSE	FALSE
73	92	65	27	98	100	92	8	13	34	1	33	60	93	45	48	20	0	0	0	2	102000	1680	44	1	0.45	0	36.1395	0	1.16608	1.05333	NA	NA	NA	NA	NA	NA	1	0	NA	FALSE	TRUE	FALSE	FALSE	FALSE
65	90	56	34	99	100	96	4	31	44	1	43	69	97	49	48	100	0	0	0	2	50000	1600	60	0	0.8	0	19.5312	0	0.953047	2.84667	1	0	0	0	0	1	0	0	FALSE	FALSE	TRUE	FALSE	FALSE	FALSE
67	81	46	35	100	100	100	0	10	21	1	20	77	88	69	19	50	0	0	0	2	105000	1630	73	0	0.47	0	39.5197	1	1.0727	2.57	1	0	0	1	1	0	0	0	FALSE	FALSE	FALSE	TRUE	FALSE	FALSE
78	101	61	40	99	100	98	2	21	31	2	29	69	83	59	24	40	0	0	0	3	70000	1680	41	0	0.56	0	24.8016	1	1.10952	2.21333	2	0	0	0	0	0	0	0	FALSE	FALSE	FALSE	FALSE	FALSE	FALSE
84	129	67	62	99	100	99	1	17	49	2	47	73	101	56	45	50	0	0	0	2	95000	1770	37	0	0.47	0	30.3233	1	1.02237	2.86667	2	0	0	1	0	0	0	0	FALSE	FALSE	FALSE	FALSE	TRUE	FALSE
80	96	70	26	99	100	97	3	21	32	1	31	83	97	67	30	60	0	0	0	2	90000	1650	56	0	0.55	0	33.0579	1	1.00278	3.55333	1	0	0	0	0	0	0	0	FALSE	FALSE	FALSE	FALSE	FALSE	FALSE
72	88	58	30	99	100	99	1	16	25	2	23	63	99	47	52	25	0	0	0	2	60000	1630	59	0	0.87	0	22.5827	1	0.99503	2.98333	2	0	0	0	0	1	0	0	FALSE	FALSE	TRUE	FALSE	FALSE	FALSE
75	84	61	23	99	100	98	2	10	28	2	26	84	99	72	27	40	0	0	0	2	103000	1750	62	0	0.32	0	33.6327	0	0.989734	2.51667	1	1	0	0	0	1	1	0	FALSE	FALSE	FALSE	FALSE	FALSE	FALSE
61	77	56	21	98	100	90	10	9	21	1	20	78	87	68	19	30	0	0	0	2	84000	1800	59	1	0.38	0	25.9259	1	0.994381	1.9	1	0	0	0	0	NA	1	0	FALSE	TRUE	FALSE	FALSE	FALSE	FALSE
82	94	75	19	99	100	98	2	15	28	3	25	100	109	97	12	50	0	0	0	2	54000	1400	54	0	0.24	0	27.551	1	1.00515	1.60333	1	0	0	0	0	0	0	0	FALSE	FALSE	FALSE	FALSE	FALSE	TRUE
69	81	59	22	99	100	86	14	17	26	2	24	53	66	47	19	50	0	0	0	3	71000	1710	45	0	0.39	0	24.281	0	0.98845	3.13667	1	1	0	0	0	1	0	0	FALSE	TRUE	TRUE	FALSE	FALSE	FALSE
93	106	83	23	95	97	94	3	14	49	2	47	94	102	81	21	15	0	0	0	3	81000	1770	67	0	0.24	0	25.8546	0	0.951543	3.23667	1	0	0	1	0	0	0	0	FALSE	FALSE	FALSE	FALSE	FALSE	FALSE
75	92	65	27	99	100	90	10	14	37	1	36	71	78	64	14	40	0	0	0	2	90000	1700	70	0	0.54	0	31.1419	1	0.976309	2.78667	2	0	0	0	0	0	1	0	FALSE	TRUE	FALSE	FALSE	FALSE	FALSE
72	87	64	23	99	100	98	2	19	57	2	55	90	135	74	61	50	0	0	0	2	52000	1650	83	1	0.57	0	19.1001	1	0.945935	1.5	1	1	0	0	0	0	1	0	FALSE	FALSE	FALSE	FALSE	FALSE	TRUE
79	112	72	40	99	100	98	2	19	33	3	30	73	88	58	30	50	0	0	0	2	54000	1600	34	1	0.35	0	21.0938	1	1.02365	2.20333	NA	0	0	0	0	1	1	0	NA	FALSE	FALSE	FALSE	FALSE	FALSE
83	104	63	41	100	100	100	0	18	25	2	23	77	103	55	48	50	0	0	0	2	60000	1600	55	0	0.86	0	23.4375	1	1.00323	2.99667	2	1	0	0	0	0	0	0	FALSE	FALSE	TRUE	FALSE	FALSE	FALSE
73	104	52	52	99	100	97	3	11	29	1	28	72	96	61	35	40	0	0	0	2	70000	1740	65	0	0.4	0	23.1206	0	0.959494	1.93667	1	1	0	1	0	0	0	0	FALSE	FALSE	FALSE	FALSE	FALSE	FALSE
62	78	34	44	98	100	97	3	19	44	2	42	69	116	46	70	40	0	0	0	2	68000	1840	44	0	0.27	0	20.0851	0	0.964506	3.45333	1	0	0	0	0	1	1	1	FALSE	FALSE	TRUE	TRUE	FALSE	TRUE
86	93	69	24	96	100	85	15	16	58	1	57	81	94	76	18	50	0	0	0	3	78000	1770	63	1	0.37	0	24.8971	0	1.08289	1.71667	2	1	0	0	0	0	1	0	FALSE	TRUE	FALSE	FALSE	FALSE	FALSE
66	79	42	37	99	100	99	1	15	23	1	22	73	91	64	27	40	0	0	0	2	90000	1760	71	0	0.35	0	29.0548	0	0.976834	2.57	2	1	0	0	0	0	1	0	FALSE	FALSE	FALSE	TRUE	FALSE	FALSE
71	82	63	19	97	100	93	7	20	27	1	26	85	103	78	25	70	0	0	0	2	80000	1800	59	1	0.55	0	24.6914	0	1.05764	2.58	1	1	0	0	0	0	1	0	FALSE	FALSE	FALSE	FALSE	FALSE	FALSE
87	99	64	35	94	97	91	6	13	28	1	27	82	141	65	76	20	0	0	0	2	80000	1700	77	0	0.34	0	27.6817	0	0.972443	1.97	1	0	0	0	0	0	1	0	FALSE	FALSE	FALSE	FALSE	FALSE	TRUE
65	79	57	22	99	100	89	11	9	27	1	26	89	96	82	14	35	0	0	0	2	46000	1500	72	0	0.35	0	20.4444	0	0.949583	1.55333	1	1	1	0	0	0	1	0	FALSE	TRUE	FALSE	FALSE	FALSE	FALSE
84	94	64	30	99	100	95	5	17	69	1	68	75	91	68	23	45	0	0	0	2	107000	1950	48	1	0.63	0	28.1394	0	1.18182	1.93333	3	0	0	0	0	1	1	0	TRUE	FALSE	FALSE	FALSE	FALSE	FALSE
60	71	55	16	99	100	98	2	20	56	2	54	80	85	76	9	40	0	0	0	2	108000	1780	52	0	0.5	0	34.0866	0	1.03001	2.78333	2	1	0	0	1	0	0	0	FALSE	FALSE	FALSE	FALSE	FALSE	FALSE
69	108	63	45	99	100	98	2	15	25	6	19	88	107	77	30	45	0	0	0	2	88000	1820	58	0	0.45	0	26.5668	0	0.969489	2.92	2	0	0	0	0	0	0	0	FALSE	FALSE	FALSE	FALSE	FALSE	TRUE
80	91	70	21	98	100	94	6	17	33	2	31	69	98	57	41	45	0	0	0	1	60000	1790	58	1	0.72	0	18.726	1	0.961017	4.27	2	0	0	0	0	1	0	0	FALSE	FALSE	FALSE	FALSE	FALSE	FALSE
70	96	58	38	100	100	100	0	16	38	2	36	74	91	44	47	45	0	0	0	3	45000	1640	61	1	0.7	0	16.7311	1	1.02323	3.3	1	0	0	1	0	0	0	0	FALSE	FALSE	TRUE	FALSE	FALSE	FALSE
74	93	61	32	100	100	100	0	16	23	2	21	77	91	65	26	30	0	0	0	2	55000	1560	48	0	0.32	0	22.6003	1	1.01371	2.11667	1	0	0	1	0	0	1	0	FALSE	FALSE	FALSE	FALSE	FALSE	FALSE
66	87	50	37	100	100	100	0	16	31	2	29	87	95	81	14	35	0	0	0	2	68000	1780	46	0	0.32	0	21.4619	0	0.963874	2.28333	2	1	0	0	0	0	0	1	FALSE	FALSE	FALSE	TRUE	FALSE	FALSE
71	103	61	42	99	100	79	21	15	29	1	28	79	136	57	79	75	0	0	0	3	64000	1680	81	0	1.17	0	22.6757	1	0.904513	2.83667	4	1	0	0	0	0	1	1	TRUE	TRUE	FALSE	FALSE	FALSE	TRUE
66	83	60	23	99	100	79	21	16	22	1	21	43	57	31	26	35	0	0	0	3	60000	1650	90	0	0.62	0	22.0386	0	0.929022	1.05	1	1	1	1	0	0	1	1	FALSE	TRUE	TRUE	FALSE	FALSE	FALSE
77	91	69	22	98	100	93	7	18	26	1	25	65	81	46	35	90	0	0	0	2	66000	1750	57	0	0.85	0	21.551	0	0.957774	4.63	NA	0	0	0	0	NA	1	0	NA	FALSE	TRUE	FALSE	FALSE	FALSE
62	91	42	49	100	100	100	0	16	25	7	18	80	98	67	31	40	0	0	0	2	76000	1730	35	0	0.33	0	25.3934	0	0.986444	2.11667	1	0	0	0	0	1	1	0	FALSE	FALSE	FALSE	TRUE	FALSE	FALSE
64	90	53	37	99	100	91	9	16	40	2	38	74	105	66	39	45	0	0	0	2	91000	1730	50	1	0.53	0	30.4053	0	1.07237	1.69667	1	0	0	0	0	0	1	0	FALSE	FALSE	FALSE	FALSE	FALSE	TRUE
100	175	72	103	97	100	93	7	22	32	3	29	61	77	51	26	40	0	0	0	2	71000	1600	70	1	0.48	0	27.7344	1	0.98364	2.29667	1	0	0	0	0	0	1	0	FALSE	FALSE	TRUE	FALSE	TRUE	FALSE
94	112	86	26	98	100	86	14	11	38	1	37	96	119	81	38	40	0	0	0	2	75000	1740	70	0	0.32	0	24.7721	0	0.962827	1.21667	2	0	0	1	0	0	1	0	FALSE	TRUE	FALSE	FALSE	FALSE	TRUE
83	94	77	17	98	100	92	8	14	29	2	27	77	123	62	61	40	0	0	0	1	60000	1550	61	1	0.49	0	24.974	1	0.973351	1.63667	2	0	0	0	0	0	1	0	FALSE	FALSE	FALSE	FALSE	FALSE	TRUE
53	69	47	22	99	100	87	13	10	31	2	29	64	74	55	19	40	0	0	0	2	69000	1700	68	1	0.47	0	23.8754	1	0.978338	1.43667	2	0	0	0	0	0	1	0	FALSE	TRUE	TRUE	TRUE	FALSE	FALSE
60	80	49	31	99	100	98	2	9	24	2	22	76	83	69	14	40	0	0	0	1	56000	1630	70	0	0.45	0	21.0772	0	1.02976	1.34667	1	1	0	0	1	0	1	0	FALSE	FALSE	FALSE	TRUE	FALSE	FALSE
70	85	61	24	99	100	97	3	14	25	2	23	80	93	70	23	40	0	0	0	2	64000	1590	60	0	0.44	0	25.3155	0	0.960212	1.42	3	0	0	0	0	0	1	0	TRUE	FALSE	FALSE	FALSE	FALSE	FALSE
95	110	88	22	100	100	100	0	24	31	2	29	74	82	69	13	30	0	0	0	2	76000	1600	73	0	0.27	0	29.6875	1	0.96839	0.8	2	0	0	0	0	NA	1	1	FALSE	FALSE	FALSE	FALSE	FALSE	FALSE
63	71	53	18	98	100	95	5	21	27	4	23	76	89	68	21	40	0	0	0	2	84000	1710	56	0	0.25	0	28.7268	1	1.00463	3.95333	2	1	0	0	0	0	0	0	FALSE	FALSE	FALSE	FALSE	FALSE	FALSE
85	98	64	34	100	100	100	0	13	30	2	28	82	95	70	25	50	0	0	0	2	71000	1760	57	1	0.55	0	22.921	0	1.06102	2.93	1	0	0	0	0	0	1	0	FALSE	FALSE	FALSE	FALSE	FALSE	FALSE
62	72	54	18	100	100	100	0	17	35	2	33	87	104	71	33	40	0	0	0	2	58000	1600	61	1	0.52	0	22.6562	1	0.984567	1.86667	2	0	0	0	0	1	1	0	FALSE	FALSE	FALSE	FALSE	FALSE	FALSE
90	96	82	14	94	96	93	3	16	24	1	23	55	62	47	15	70	0	0	0	3	105000	1730	39	1	0.85	0	35.083	0	1.00791	4.66667	4	0	0	0	0	1	0	0	TRUE	FALSE	TRUE	FALSE	FALSE	FALSE
76	90	65	25	98	100	87	13	15	32	1	31	73	144	62	82	40	0	0	0	2	75000	1650	62	1	1.19	0	27.5482	1	0.993461	1.75333	2	0	0	0	0	0	0	1	FALSE	TRUE	FALSE	FALSE	FALSE	TRUE
86	115	78	37	98	100	93	7	20	37	1	36	71	85	62	23	50	0	0	0	2	80000	1700	19	1	0.68	0	27.6817	1	1.02174	1.83333	1	0	0	0	0	1	0	0	FALSE	FALSE	FALSE	FALSE	FALSE	FALSE
81	115	57	58	99	100	91	9	16	39	1	38	87	100	73	27	100	0	0	0	2	100000	1840	36	0	0.45	0	29.5369	0	0.993857	1.85333	1	0	0	0	0	0	0	0	FALSE	FALSE	FALSE	FALSE	FALSE	FALSE
78	108	68	40	99	100	96	4	15	44	1	43	85	108	68	40	35	0	0	0	2	62000	1600	62	1	0.49	0	24.2188	1	0.987342	2.53667	1	0	0	0	0	0	1	0	FALSE	FALSE	FALSE	FALSE	FALSE	TRUE
66	72	58	14	99	100	86	14	10	27	2	25	65	72	59	13	35	0	0	0	2	76000	1750	64	1	0.44	0	24.8163	0	1.04866	1.98667	1	0	0	0	0	0	1	0	FALSE	TRUE	FALSE	FALSE	FALSE	FALSE
72	85	63	22	99	100	88	12	9	44	2	42	74	88	63	25	35	0	0	0	2	53000	1590	43	1	0.65	0	20.9644	0	1.09284	1.46667	2	0	0	1	0	0	1	0	FALSE	TRUE	FALSE	FALSE	FALSE	FALSE
77	86	68	18	99	100	99	1	16	36	2	34	90	101	66	35	30	0	0	0	2	70000	1670	84	1	0.42	0	25.0995	1	0.957176	1.55	2	0	0	0	0	1	1	0	FALSE	FALSE	FALSE	FALSE	FALSE	FALSE
72	90	55	35	99	100	96	4	12	25	1	24	79	86	72	14	50	0	0	0	2	81000	1750	66	1	0.58	0	26.449	0	0.969458	1.88	2	0	0	0	1	0	1	0	FALSE	FALSE	FALSE	FALSE	FALSE	FALSE
66	73	61	12	97	100	94	6	12	18	1	17	66	69	63	6	40	0	0	0	2	90000	1700	50	0	0.4	0	31.1419	1	1.0043	1.90333	1	0	0	0	0	0	1	0	FALSE	FALSE	FALSE	FALSE	FALSE	FALSE
68	84	58	26	97	100	90	10	16	31	1	30	86	91	78	13	40	0	0	0	2	103000	1800	51	0	0.4	0	31.7901	0	1.02865	2.15	2	0	0	0	1	0	1	0	FALSE	TRUE	FALSE	FALSE	FALSE	FALSE
68	91	53	38	99	100	97	3	9	21	1	20	61	92	44	48	45	0	0	0	2	80000	1700	70	1	0.66	0	27.6817	0	1.14452	1.19667	3	1	0	0	0	0	1	0	TRUE	FALSE	TRUE	FALSE	FALSE	FALSE
75	89	59	30	98	99	96	3	22	55	2	53	86	102	79	23	55	0	0	0	3	91000	1750	51	1	0.62	0	29.7143	0	1.12111	2	1	0	0	0	0	0	1	0	FALSE	FALSE	FALSE	FALSE	FALSE	FALSE
82	113	72	41	99	100	94	6	15	23	2	21	71	99	59	40	45	0	0	0	2	67000	1580	71	0	0.47	0	26.8386	1	0.969302	1.62	1	1	0	0	0	0	1	0	FALSE	FALSE	FALSE	FALSE	FALSE	FALSE
79	87	61	26	96	100	91	9	16	28	1	27	68	88	61	27	99	0	0	0	2	100000	1770	51	1	0.71	0	31.9193	0	1.19219	1.04667	3	0	0	1	0	0	1	0	TRUE	FALSE	FALSE	FALSE	FALSE	FALSE
70	80	65	15	100	100	100	0	15	23	2	21	66	88	55	33	50	0	0	0	2	58000	1590	72	0	0.53	0	22.9421	1	0.96351	2.36333	1	0	0	0	0	0	0	0	FALSE	FALSE	TRUE	FALSE	FALSE	FALSE
68	77	63	14	100	100	100	0	18	26	2	24	65	73	57	16	40	0	0	0	2	50000	1590	71	0	0.37	0	19.7777	1	0.962843	2.16667	1	0	0	1	0	0	0	0	FALSE	FALSE	FALSE	FALSE	FALSE	FALSE
72	85	61	24	100	100	100	0	19	43	2	41	62	96	44	52	45	0	0	0	2	63000	1580	77	0	1.1	0	25.2363	1	0.954007	2.3	2	0	0	0	0	1	1	1	FALSE	FALSE	TRUE	FALSE	FALSE	FALSE
75	85	61	24	99	100	98	2	22	33	2	31	75	84	71	13	40	0	0	0	2	85000	1680	62	0	0.16	0	30.1162	1	0.993203	1.13	1	1	0	1	0	0	1	0	FALSE	FALSE	FALSE	FALSE	FALSE	FALSE
67	72	64	8	100	100	100	0	7	19	2	17	97	118	85	33	30	0	0	0	2	71000	1800	73	0	0.25	0	21.9136	0	0.952781	1.53333	NA	0	0	0	0	0	1	0	NA	FALSE	FALSE	FALSE	FALSE	TRUE
104	115	83	32	99	100	95	5	21	36	2	34	82	87	75	12	20	0	0	0	2	109000	1700	60	0	0.68	0	37.7163	0	1.02584	4.01667	1	1	0	0	1	1	1	1	FALSE	FALSE	FALSE	FALSE	FALSE	FALSE
61	69	53	16	99	100	89	11	20	38	2	36	61	68	50	18	45	0	0	0	1	50000	1600	54	1	0.46	0	19.5312	1	1.0318	3.23	NA	NA	NA	NA	NA	NA	0	0	NA	TRUE	TRUE	FALSE	FALSE	FALSE
71	80	64	16	99	100	94	6	11	17	1	16	74	86	68	18	35	0	0	0	2	66000	1600	71	1	0.5	0	25.7812	1	0.97809	1.83333	1	1	0	0	0	0	1	0	FALSE	FALSE	FALSE	FALSE	FALSE	FALSE
65	81	56	25	97	100	90	10	11	20	1	19	67	76	58	18	35	0	0	0	2	70000	1700	71	1	0.32	0	24.2215	1	0.975168	1.58333	2	0	0	0	0	0	1	0	FALSE	TRUE	FALSE	FALSE	FALSE	FALSE
64	84	55	29	99	100	97	3	13	22	1	21	82	99	74	25	45	0	0	0	2	75000	1790	62	1	0.61	0	23.4075	0	1.04809	2.24667	2	0	0	0	0	0	0	0	FALSE	FALSE	FALSE	FALSE	FALSE	FALSE
89	105	81	24	99	100	96	4	24	40	1	39	82	128	38	90	45	0	0	0	3	97000	1680	81	1	0.7	0	34.3679	0	0.997191	5.87	3	1	1	1	0	0	0	0	TRUE	FALSE	TRUE	FALSE	FALSE	TRUE
74	85	60	25	96	100	92	8	13	37	1	36	57	67	52	15	55	0	0	0	2	78000	1690	74	0	0.54	0	27.31	0	0.979974	2.43667	4	1	0	1	0	0	0	0	TRUE	FALSE	TRUE	FALSE	FALSE	FALSE
75	84	69	15	98	100	67	33	20	32	2	30	88	98	78	20	45	0	0	0	3	68000	1570	54	0	0.45	0	27.5873	0	0.980074	2.05	2	0	0	0	0	0	0	0	FALSE	TRUE	FALSE	FALSE	FALSE	FALSE
70	93	56	37	99	100	98	2	15	59	1	58	61	95	49	46	20	0	0	0	2	70000	1600	51	1	0.7	0	27.3438	1	1.00273	4.85	2	1	0	0	0	1	1	1	FALSE	FALSE	TRUE	FALSE	FALSE	FALSE
85	107	73	34	99	100	93	7	13	96	1	95	72	82	60	22	10	0	0	0.5	1	67000	1700	25	1	0.45	2	23.1834	0	0.223151	4.16667	1	0	0	0	0	0	1	0	FALSE	FALSE	FALSE	FALSE	FALSE	FALSE
61	85	55	30	100	100	100	0	12	67	1	66	80	101	63	38	10	0	0	0	2	59000	1700	77	0	0.68	0	20.4152	0	0.946552	1.51333	1	1	0	0	0	0	1	1	FALSE	FALSE	FALSE	FALSE	FALSE	FALSE
78	90	71	19	99	100	97	3	13	32	1	31	94	120	70	50	10	0	0	0	2	70000	1620	82	0	0.38	0	26.6728	1	0.949255	3.03333	1	0	0	0	0	0	1	0	FALSE	FALSE	FALSE	FALSE	FALSE	TRUE
74	93	62	31	100	100	100	0	11	32	1	31	76	91	68	23	10	0	0	0	1	76000	1670	58	0	0.3	0	27.2509	1	0.949771	2.50333	1	1	0	0	0	0	1	0	FALSE	FALSE	FALSE	FALSE	FALSE	FALSE
78	93	70	23	100	100	100	0	11	29	2	27	72	78	67	11	45	0	0	0	2	85000	1700	46	0	0.27	0	29.4118	1	1.012	1.93667	2	0	0	0	0	0	1	0	FALSE	FALSE	FALSE	FALSE	FALSE	FALSE
83	101	63	38	99	100	97	3	12	31	2	29	74	103	57	46	50	0	0	0	2	75000	1600	69	0	0.6	0	29.2969	1	0.976901	1.56333	2	1	0	0	0	1	1	0	FALSE	FALSE	FALSE	FALSE	FALSE	FALSE
64	90	48	42	99	100	82	18	15	36	1	35	65	84	52	32	45	0	0	0	2	82000	1730	54	0	0.6	0	27.3982	0	0.972801	2.76667	1	0	0	0	0	0	0	0	FALSE	TRUE	TRUE	TRUE	FALSE	FALSE
76	103	63	40	99	100	83	17	15	19	1	18	48	58	40	18	45	0	0	0	2	81000	1740	50	0	0.45	0	26.7539	0	0.953284	2.07	3	0	0	0	0	0	0	0	TRUE	TRUE	TRUE	FALSE	FALSE	FALSE
73	90	66	24	97	99	94	5	16	44	2	42	77	110	59	51	45	0	0	0	2	68000	1630	66	1	0.53	0	25.5937	1	0.984604	2.08	1	1	0	0	0	0	1	1	FALSE	FALSE	FALSE	FALSE	FALSE	TRUE
62	87	57	30	99	100	97	3	12	42	2	40	74	93	63	30	45	0	0	0	2	52000	1640	75	0	0.36	0	19.3337	0	0.945054	1.49667	1	0	0	0	0	0	0	0	FALSE	FALSE	FALSE	FALSE	FALSE	FALSE
86	109	78	31	100	100	100	0	17	31	2	29	89	108	66	42	45	0	0	0	2	56000	1630	64	0	0.31	0	21.0772	1	0.981177	1.21333	2	0	0	1	0	0	1	1	FALSE	FALSE	FALSE	FALSE	FALSE	TRUE
74	105	60	45	100	100	100	0	19	43	2	41	98	151	72	79	75	0	0	0	2	82000	1820	74	0	0.55	0	24.7555	1	0.960518	0.936667	1	1	0	0	0	0	0	0	FALSE	FALSE	FALSE	FALSE	FALSE	TRUE
84	100	81	19	94	98	88	10	19	90	2	88	83	105	71	34	20	0	0	0.5	2	61000	1600	67	1	0.54	2	23.8281	0	0.352158	2.20333	NA	1	0	1	0	0	1	0	NA	TRUE	FALSE	FALSE	FALSE	TRUE
73	85	68	17	98	100	96	4	16	30	1	29	85	101	72	29	10	0	0	0	2	73000	1600	73	0	0.58	0	28.5156	1	0.966334	1.8	2	1	0	0	0	0	1	0	FALSE	FALSE	FALSE	FALSE	FALSE	FALSE
69	82	63	19	99	100	90	10	10	34	1	33	67	89	54	35	10	0	0	0	2	75000	1650	86	0	0.75	0	27.5482	1	0.946973	1.68667	2	1	0	0	0	0	1	0	FALSE	TRUE	TRUE	FALSE	FALSE	FALSE
75	96	61	35	100	100	100	0	12	18	1	17	50	66	37	29	85	0	0	0	2	76000	1820	39	0	0.56	0	22.9441	0	0.942284	2.84667	3	0	0	0	0	0	0	0	TRUE	FALSE	TRUE	FALSE	FALSE	FALSE
90	122	74	48	99	100	97	3	21	37	2	35	85	139	67	72	40	0	0	0	2	85000	1690	60	0	0.42	0	29.7609	1	0.997238	2.77	2	1	0	0	0	0	1	0	FALSE	FALSE	FALSE	FALSE	TRUE	TRUE
82	91	75	16	99	100	97	3	14	31	2	29	84	90	78	12	50	0	0	0	1	83000	1800	62	0	0.29	0	25.6173	0	1.03587	1.67	2	0	0	1	1	0	1	0	FALSE	FALSE	FALSE	FALSE	FALSE	FALSE
57	66	48	18	99	100	99	1	15	23	1	22	65	71	60	11	50	0	0	0	2	74000	1780	76	0	0.52	0	23.3556	0	0.955171	1.31667	2	1	0	0	0	0	1	0	FALSE	FALSE	FALSE	TRUE	FALSE	FALSE
67	80	54	26	100	100	100	0	13	43	2	41	74	99	53	46	49	0	0	0	2	92000	1680	66	0	0.47	0	32.5964	0	0.985189	1.46667	2	1	1	1	0	0	0	0	FALSE	FALSE	TRUE	FALSE	FALSE	FALSE
78	103	65	38	99	100	99	1	22	40	2	38	79	95	64	31	50	0	0	0	2	90000	1790	27	0	0.32	0	28.089	0	1.00255	3.50333	1	0	0	1	0	0	0	0	FALSE	FALSE	FALSE	FALSE	FALSE	FALSE
63	76	58	18	99	100	95	5	10	38	2	36	74	92	64	28	30	0	0	0	2	78000	1830	43	1	0.59	0	23.2912	0	1.16096	3.10333	3	0	0	0	0	0	0	0	TRUE	FALSE	FALSE	FALSE	FALSE	FALSE
78	106	71	35	99	100	97	3	17	40	2	38	79	99	66	33	30	0	0	0	1	70000	1730	35	0	0.38	0	23.3887	1	0.990735	2.41333	2	0	0	1	0	0	0	0	FALSE	FALSE	FALSE	FALSE	FALSE	FALSE
61	81	56	25	100	100	100	0	18	34	7	27	111	182	48	134	150	0	0	0	2	63000	1730	79	0	1.25	0	21.0498	0	0.92744	2.42	NA	NA	NA	NA	NA	NA	0	0	NA	FALSE	TRUE	FALSE	FALSE	TRUE
63	85	43	42	100	100	100	0	16	38	2	36	49	63	36	27	50	0	0	0	2	71000	1750	54	0	0.6	0	23.1837	0	0.962155	1.15	2	0	0	0	0	0	0	0	FALSE	FALSE	TRUE	TRUE	FALSE	FALSE
64	81	59	22	99	100	96	4	15	34	2	32	64	127	47	80	40	0	0	0	2	80000	1750	75	0	0.42	0	26.1224	0	0.966781	1.92	1	0	0	1	0	0	0	0	FALSE	FALSE	TRUE	FALSE	FALSE	TRUE
75	98	45	53	100	100	100	0	18	27	1	26	68	90	42	48	50	0	0	0	2	50000	1520	45	0	0.42	0	21.6413	1	1.01777	2.28667	1	0	0	0	0	0	0	0	FALSE	FALSE	TRUE	TRUE	FALSE	FALSE
85	109	78	31	100	100	100	0	13	33	1	32	91	154	79	75	50	0	0	0	2	70000	1650	34	0	0.43	0	25.7117	1	1.02977	2.03	3	0	0	0	0	0	0	0	TRUE	FALSE	FALSE	FALSE	FALSE	TRUE
58	63	52	11	99	100	98	2	13	28	2	26	76	91	68	23	10	0	0	0	2	117000	1690	66	0	0.88	0	40.965	0	1.03102	5.54667	NA	1	1	0	1	0	1	1	NA	FALSE	FALSE	FALSE	FALSE	FALSE
79	99	74	25	99	100	99	1	17	25	2	23	86	102	73	29	10	0	0	0	2	87000	1800	83	0	0.32	0	26.8519	0	0.982148	3.3	3	1	0	0	0	0	1	0	TRUE	FALSE	FALSE	FALSE	FALSE	FALSE
81	92	65	27	100	100	100	0	18	40	2	38	59	86	47	39	10	0	0	0	2	74000	1660	26	0	0.48	0	26.8544	0	1.00352	2.86333	2	0	0	0	0	0	1	0	FALSE	FALSE	TRUE	FALSE	FALSE	FALSE
70	89	52	37	99	100	98	2	14	29	1	28	75	88	64	24	10	0	5	0	2	60000	1680	31	1	0.68	1	21.2585	1	0.370463	2.36333	3	0	0	0	0	0	1	0	TRUE	FALSE	FALSE	FALSE	FALSE	FALSE
77	111	64	47	99	100	98	2	14	29	2	27	68	75	61	14	10	0	0	0	2	75000	1700	56	0	0.3	0	25.9516	1	1.00441	2.25333	2	0	0	0	0	0	1	0	FALSE	FALSE	FALSE	FALSE	FALSE	FALSE
61	67	56	11	99	100	92	8	18	42	6	36	83	161	54	107	10	0	0	0	2	78000	1800	69	0	0.54	0	24.0741	0	0.961228	1.13667	2	1	0	1	0	1	0	0	FALSE	FALSE	TRUE	FALSE	FALSE	TRUE
58	82	50	32	99	100	90	10	13	26	1	25	58	112	44	68	10	0	5	0	2	73000	1600	57	1	0.58	1	28.5156	0	1.47032	2.25	2	0	0	0	0	0	1	1	FALSE	TRUE	TRUE	TRUE	FALSE	TRUE
80	90	67	23	96	100	91	9	22	33	2	31	89	96	79	17	10	0	0	0	3	112000	1620	47	0	0.49	0	42.6764	1	1.11786	1.95333	1	0	0	0	0	0	1	0	FALSE	FALSE	FALSE	FALSE	FALSE	FALSE
87	93	66	27	97	98	97	1	25	32	2	30	92	101	84	17	10	0	0	0	2	73000	1690	57	0	0.28	0	25.5593	0	0.966783	1.71667	2	1	0	1	0	0	1	0	FALSE	FALSE	FALSE	FALSE	FALSE	FALSE
77	105	67	38	99	100	97	3	17	33	1	32	98	151	70	81	10	0	5	0	2	50000	1670	80	0	0.79	1	17.9282	0	1.26899	1.50333	2	1	0	1	0	0	1	0	FALSE	FALSE	FALSE	FALSE	FALSE	TRUE
65	91	59	32	99	100	97	3	9	57	2	55	69	89	57	32	10	0	5	0	3	82000	1850	69	1	0.7	1	23.9591	1	0.846503	2.05	2	0	0	0	0	0	1	0	FALSE	FALSE	FALSE	FALSE	FALSE	FALSE
63	93	56	37	100	100	100	0	14	36	2	34	75	99	64	35	35	0	0	0	1	105000	1570	60	0	0.41	0	42.5981	1	0.951672	2.01333	1	0	0	0	0	0	0	0	FALSE	FALSE	FALSE	FALSE	FALSE	FALSE
72	97	66	31	100	100	100	0	16	22	2	20	81	146	57	89	35	0	0	0	1	69000	1700	71	0	0.45	0	23.8754	0	1.00097	1.63667	3	1	0	0	0	0	0	1	TRUE	FALSE	FALSE	FALSE	FALSE	TRUE
71	86	55	31	99	100	93	7	21	30	2	28	88	114	78	36	60	0	0	0	2	67000	1580	51	0	0.5	0	26.8386	0	0.954692	2.10333	3	1	0	0	0	0	0	1	TRUE	FALSE	FALSE	FALSE	FALSE	TRUE
87	99	75	24	98	100	94	6	10	19	2	17	76	92	66	26	45	0	0	0	2	95000	1700	54	1	0.44	0	32.872	1	1.25333	1.53667	3	1	0	0	0	0	0	0	TRUE	FALSE	FALSE	FALSE	FALSE	FALSE
82	102	75	27	99	100	98	2	17	28	2	26	82	88	77	11	10	0	0	0	2	66000	1680	55	0	0.23	0	23.3844	1	1.00312	1.49667	1	0	0	1	0	0	1	0	FALSE	FALSE	FALSE	FALSE	FALSE	FALSE
69	76	62	14	98	100	91	9	10	23	2	21	73	96	59	37	51	0	5	0	2	60000	1600	56	1	1.15	1	23.4375	1	1.43679	2.36667	2	1	0	1	0	1	1	0	FALSE	FALSE	FALSE	FALSE	FALSE	FALSE
68	85	60	25	99	100	98	2	13	68	2	66	62	83	49	34	35	0	0	0	2	115000	1600	74	1	0.4	0	44.9219	1	0.981589	0.933333	2	0	0	0	0	0	0	0	FALSE	FALSE	TRUE	FALSE	FALSE	FALSE
60	69	50	19	100	100	100	0	18	34	4	30	84	93	74	19	30	0	0	0	2	65000	1700	60	0	0.28	0	22.4913	1	0.992764	1.55	1	0	0	0	0	0	0	0	FALSE	FALSE	FALSE	TRUE	FALSE	FALSE
67	78	55	23	100	100	100	0	11	17	2	15	63	67	60	7	40	0	0	0	2	92000	1700	44	0	0.28	0	31.8339	1	1.01009	1.31667	2	0	0	0	0	0	1	0	FALSE	FALSE	FALSE	FALSE	FALSE	FALSE
70	84	70	14	98	100	78	22	15	27	1	26	72	98	56	42	30	0	0	0	2	49000	1610	83	0	0.58	0	18.9036	1	0.930251	2.28	3	0	1	0	0	0	0	0	TRUE	TRUE	FALSE	FALSE	FALSE	FALSE
68	79	52	27	99	100	97	3	13	24	1	23	57	81	41	40	130	0	0	0	2	48000	1550	67	0	1.26	0	19.9792	0	0.938287	2.03	NA	NA	NA	NA	NA	NA	1	1	NA	FALSE	TRUE	FALSE	FALSE	FALSE
61	76	54	22	99	100	99	1	15	25	1	24	52	59	43	16	40	0	0	0	1	79000	1800	74	0	0.51	0	24.3827	0	0.999332	2.14667	3	0	0	0	0	0	1	0	TRUE	FALSE	TRUE	FALSE	FALSE	FALSE
72	86	67	19	100	100	100	0	15	23	1	22	74	88	63	25	30	0	0	0	1	70000	1720	33	1	0.38	0	23.6614	1	0.998612	2.45	1	0	0	0	0	0	1	0	FALSE	FALSE	FALSE	FALSE	FALSE	FALSE
57	66	46	20	95	98	90	8	14	34	1	33	50	90	39	51	80	0	0	0	1	61000	1680	58	1	1.1	0	21.6128	0	1.07143	5.96667	4	1	0	0	0	1	0	1	TRUE	TRUE	TRUE	TRUE	FALSE	FALSE
53	65	42	23	99	100	99	1	12	18	2	16	53	85	41	44	40	0	0	0	1	63000	1730	73	0	0.42	0	21.0498	0	1.00469	1.75333	3	1	1	0	1	0	0	0	TRUE	FALSE	TRUE	TRUE	FALSE	FALSE
76	86	61	25	99	100	96	4	14	23	1	22	90	108	75	33	45	0	0	0	2	85000	1630	59	1	0.52	0	31.9922	1	0.998857	1.47	2	1	0	0	0	1	1	0	FALSE	FALSE	FALSE	FALSE	FALSE	TRUE
72	91	62	29	99	100	97	3	15	83	1	82	82	90	74	16	45	0	0	0	2	100000	1820	69	0	0.41	0	30.1896	1	0.97761	1.66333	2	0	0	0	0	0	1	0	FALSE	FALSE	FALSE	FALSE	FALSE	FALSE
71	99	59	40	99	100	97	3	11	46	1	45	76	101	53	48	50	0	0	0	2	69000	1680	77	1	0.65	0	24.4473	1	0.967725	1.45333	1	1	0	0	0	0	1	0	FALSE	FALSE	TRUE	FALSE	FALSE	FALSE
66	76	62	14	99	100	94	6	14	20	1	19	84	109	68	41	30	50	0	0	2	105000	1820	64	0	0.5	3	31.6991	0	0.904814	3.87	NA	1	0	0	0	0	0	1	NA	FALSE	FALSE	FALSE	FALSE	TRUE
73	98	56	42	99	100	77	23	10	14	1	13	102	102	102	0	45	30	0	0	2	87000	1770	87	1	1.29	3	27.7698	0	0.933248	1.18667	2	1	0	0	0	0	0	0	FALSE	TRUE	FALSE	FALSE	FALSE	FALSE
75	89	63	26	98	100	95	5	20	32	1	31	93	104	82	22	55	85	0	0	1	78000	1760	51	0	0.37	3	25.1808	0	1.13071	2.32	1	0	0	0	0	1	0	1	FALSE	FALSE	FALSE	FALSE	FALSE	FALSE
69	98	54	44	99	100	89	11	17	31	1	30	68	146	32	114	30	25	0	0	2	55000	1560	87	0	0.47	3	22.6003	1	1.88064	1.33667	4	0	0	0	0	0	0	0	TRUE	TRUE	TRUE	FALSE	FALSE	TRUE
63	75	54	21	100	100	100	0	15	33	1	32	65	73	57	16	45	0	0	0	2	110000	1780	45	0	0.47	0	34.7178	0	1.04275	3.16667	2	1	0	0	1	0	0	1	FALSE	FALSE	FALSE	FALSE	FALSE	FALSE
78	108	71	37	99	100	99	1	11	22	2	20	80	104	66	38	40	0	0	0	3	82000	1750	69	0	0.64	0	26.7755	1	0.915231	2.70333	3	0	0	1	0	0	0	0	TRUE	FALSE	FALSE	FALSE	FALSE	FALSE
117	123	106	17	96	96	96	0	15	19	2	17	62	65	59	6	100	0	0	0	2	96000	1640	57	0	0.53	0	35.693	0	0.998258	1.6	NA	0	0	0	0	NA	0	0	NA	FALSE	FALSE	FALSE	TRUE	FALSE
69	83	54	29	100	100	100	0	9	25	1	24	77	81	72	9	30	0	0	0	2	88000	1790	53	0	0.45	0	27.4648	0	0.95862	1.83333	3	0	0	0	0	0	1	0	TRUE	FALSE	FALSE	FALSE	FALSE	FALSE
78	84	71	13	99	100	96	4	21	45	2	43	82	91	74	17	70	0	0	0	2	111000	1710	45	0	0.25	0	37.9604	0	1.00742	1.86333	1	1	0	0	0	1	1	0	FALSE	FALSE	FALSE	FALSE	FALSE	FALSE
73	82	66	16	100	100	100	0	14	24	2	22	66	67	65	2	40	0	0	0	1	91500	1810	26	1	0.32	0	27.9296	1	0.99674	1.52	1	0	0	0	0	0	0	0	FALSE	FALSE	FALSE	FALSE	FALSE	FALSE
77	89	65	24	99	100	93	7	9	17	1	16	73	93	57	36	45	0	0	0	2	83000	1720	65	1	0.51	0	28.0557	1	0.990714	2.36333	1	1	0	0	0	0	1	0	FALSE	FALSE	FALSE	FALSE	FALSE	FALSE
93	122	82	40	99	99	99	0	18	31	2	29	86	128	71	57	25	0	0	0	1	90000	1760	82	0	0.32	0	29.0548	0	0.991683	2.23333	1	0	0	0	0	0	1	0	FALSE	FALSE	FALSE	FALSE	TRUE	TRUE
85	103	74	29	100	100	100	0	11	30	1	29	69	87	58	29	70	0	0	0	2	87000	1850	46	0	0.5	0	25.42	0	0.971258	1.85	1	0	0	0	0	NA	1	0	FALSE	FALSE	FALSE	FALSE	FALSE	FALSE
73	79	59	20	98	100	89	11	7	27	1	26	66	83	58	25	50	0	0	0	2	67000	1600	45	1	0.6	0	26.1719	1	1.00402	2.58667	NA	0	0	0	0	1	0	0	NA	TRUE	FALSE	FALSE	FALSE	FALSE
88	130	74	56	99	100	98	2	15	32	2	30	104	162	76	86	70	0	0	0	3	95000	1670	75	0	0.42	0	34.0636	0	0.899387	1.06667	NA	NA	NA	NA	NA	NA	1	0	NA	FALSE	FALSE	FALSE	TRUE	TRUE
62	81	56	25	99	100	99	1	14	20	1	19	66	92	59	33	25	0	0	0	2	77000	1680	74	1	0.39	0	27.2817	0	1.03571	2.22	1	1	0	0	0	0	0	1	FALSE	FALSE	FALSE	FALSE	FALSE	FALSE
74	98	69	29	99	100	98	2	20	81	1	80	76	102	66	36	48	0	0	0	2	79000	1710	68	1	0.73	0	27.0169	0	1.04778	2.74667	2	0	0	0	0	0	0	1	FALSE	FALSE	FALSE	FALSE	FALSE	FALSE
64	79	52	27	100	100	100	0	11	20	1	19	73	90	59	31	40	0	0	0	2	55000	1700	56	0	0.54	0	19.0311	1	0.993573	3.35333	1	0	0	0	0	0	1	0	FALSE	FALSE	FALSE	FALSE	FALSE	FALSE
66	76	60	16	98	100	94	6	13	31	1	30	79	93	70	23	40	0	0	0	2	43000	1560	71	0	0.44	0	17.6693	0	0.943135	1.80333	1	0	0	0	0	0	1	0	FALSE	FALSE	FALSE	FALSE	FALSE	FALSE
71	79	54	25	99	100	96	4	8	29	1	28	74	83	68	15	40	0	0	0	2	64000	1720	70	0	0.37	0	21.6333	0	0.954059	2.25	2	1	0	0	0	0	1	0	FALSE	FALSE	FALSE	FALSE	FALSE	FALSE
81	97	54	43	99	100	98	2	10	21	1	20	82	87	78	9	30	0	0	0	2	80000	1760	52	0	0.4	0	25.8264	0	0.968981	1.94667	2	0	0	1	0	0	1	0	FALSE	FALSE	FALSE	FALSE	FALSE	FALSE
68	94	57	37	99	100	95	5	8	22	1	21	92	108	80	28	45	0	0	0.5	2	81000	1800	59	1	0.7	2	25	0	0.298521	1.35	1	0	0	1	0	0	1	0	FALSE	FALSE	FALSE	FALSE	FALSE	TRUE
67	120	58	62	99	100	98	2	14	25	1	24	94	103	84	19	30	0	0	0	2	81000	1760	75	0	0.45	0	26.1493	0	0.936127	0.896667	NA	NA	NA	NA	NA	NA	1	0	NA	FALSE	FALSE	FALSE	TRUE	FALSE
70	80	61	19	99	100	98	2	13	30	1	29	73	93	58	35	45	0	0	0	2	80000	1750	58	1	0.44	0	26.1224	1	0.99593	2.60333	2	0	0	0	0	0	0	0	FALSE	FALSE	FALSE	FALSE	FALSE	FALSE
56	62	53	9	100	100	100	0	12	22	1	21	75	117	57	60	60	0	0	0	2	80000	1800	86	0	0.88	0	24.6914	0	0.95833	3.26333	1	1	0	0	0	0	0	1	FALSE	FALSE	FALSE	FALSE	FALSE	TRUE
56	101	39	62	98	100	83	17	17	24	1	23	78	87	66	21	45	0	0	0	2	74000	1700	77	0	0.78	0	25.6055	1	0.954371	2.08	2	1	0	0	0	0	0	1	FALSE	TRUE	FALSE	TRUE	FALSE	FALSE
86	92	64	28	99	100	89	11	12	31	1	30	86	122	55	67	40	0	0	0	1	106000	1760	67	0	0.35	0	34.22	0	1.04859	1.38333	1	0	0	1	1	0	0	0	FALSE	TRUE	TRUE	FALSE	FALSE	TRUE
66	80	54	26	99	100	99	1	18	40	1	39	79	85	73	12	30	0	0	0	2	56000	1610	63	0	0.37	0	21.6041	0	0.943216	0.75	NA	NA	NA	NA	NA	NA	0	0	NA	FALSE	FALSE	FALSE	FALSE	FALSE
79	91	63	28	98	99	92	7	19	32	1	31	77	87	70	17	100	0	0	0	2	88000	1640	50	1	0.77	0	32.7186	0	1.19454	3.08667	3	0	0	0	0	0	1	1	TRUE	FALSE	FALSE	FALSE	FALSE	FALSE
66	71	58	13	99	100	98	2	14	38	2	36	80	113	69	44	50	0	0	0	2	91000	1730	53	1	0.49	0	30.4053	0	0.976916	2.55333	2	0	0	0	1	0	0	0	FALSE	FALSE	FALSE	FALSE	FALSE	TRUE
61	73	51	22	100	100	100	0	6	24	1	23	67	83	50	33	40	0	5	0	2	80000	1830	45	0	0.6	1	23.8884	0	0.599156	4.28	2	0	0	0	1	0	0	0	FALSE	FALSE	TRUE	FALSE	FALSE	FALSE
75	90	62	28	100	100	100	0	13	26	1	25	72	79	67	12	40	0	5	0	2	77000	1850	48	0	0.44	1	22.4982	0	1.31532	3.67	3	0	0	0	0	0	0	0	TRUE	FALSE	FALSE	FALSE	FALSE	FALSE
69	87	61	26	100	100	100	0	12	22	1	21	54	76	48	28	45	0	5	0	2	49000	1600	49	0	0.81	1	19.1406	1	0.797325	3.91333	1	0	0	0	0	1	0	0	FALSE	FALSE	TRUE	FALSE	FALSE	FALSE
77	118	70	48	100	100	100	0	12	36	1	35	60	84	53	31	60	0	5	0	2	42000	1570	15	1	0.74	1	17.0392	0	0.908952	3.10333	NA	NA	NA	NA	NA	NA	0	0	NA	FALSE	TRUE	FALSE	FALSE	FALSE
63	77	51	26	99	100	99	1	22	30	1	29	87	120	78	42	30	0	0	0	2	70000	1750	79	0	0.33	0	22.8571	0	0.952599	1.23333	1	1	1	0	0	0	0	1	FALSE	FALSE	FALSE	FALSE	FALSE	TRUE
81	93	76	17	100	100	100	0	13	23	1	22	79	104	67	37	20	0	0	0	2	96000	1900	67	0	0.51	0	26.5928	0	0.967938	3.26333	1	0	0	0	0	0	0	1	FALSE	FALSE	FALSE	FALSE	FALSE	FALSE
86	94	82	12	99	100	99	1	20	33	1	32	94	113	82	31	10	0	0	0	2	55000	1700	46	1	0.54	0	19.0311	1	1.00034	2.47	2	0	0	0	0	1	0	0	FALSE	FALSE	FALSE	FALSE	FALSE	TRUE
96	108	82	26	100	100	100	0	15	29	1	28	62	88	46	42	10	0	0	0	2	54000	1620	78	0	0.82	0	20.5761	1	0.947382	1.72	1	1	0	1	0	0	0	0	FALSE	FALSE	TRUE	FALSE	FALSE	FALSE
88	113	79	34	99	100	97	3	24	38	1	37	66	86	46	40	10	0	0	0	1	46000	1570	79	0	1.1	0	18.662	1	0.938127	2.15	1	0	0	0	0	0	0	0	FALSE	FALSE	TRUE	FALSE	FALSE	FALSE
71	83	60	23	96	100	92	8	23	39	1	38	59	72	48	24	10	0	0	0	2	92000	1680	70	0	0.6	0	32.5964	0	1.01851	2.33667	1	1	1	0	1	0	0	1	FALSE	FALSE	TRUE	FALSE	FALSE	FALSE
87	96	83	13	100	100	100	0	16	29	1	28	63	72	60	12	10	0	0	0	2	90000	1740	67	0	0.49	0	29.7265	0	0.977948	2.90333	3	0	0	0	0	0	0	0	TRUE	FALSE	FALSE	FALSE	FALSE	FALSE
74	90	70	20	99	100	94	6	15	33	1	32	57	64	54	10	100	0	0	0	2	84000	1780	57	1	0.62	0	26.5118	0	0.973208	2.33667	2	0	0	0	1	1	0	0	FALSE	FALSE	TRUE	FALSE	FALSE	FALSE
73	84	64	20	98	100	94	6	20	26	1	25	59	80	46	34	50	0	0	0	2	59000	1590	72	0	0.6	0	23.3377	0	0.957702	2.03667	2	0	0	0	0	0	0	1	FALSE	FALSE	TRUE	FALSE	FALSE	FALSE
78	88	69	19	99	100	83	17	17	31	1	30	69	86	60	26	50	0	0	0	3	53000	1650	66	1	0.64	0	19.4674	1	1.02162	1.72	2	0	0	1	0	0	1	1	FALSE	TRUE	FALSE	FALSE	FALSE	FALSE
68	78	62	16	100	100	100	0	12	39	1	38	71	101	57	44	60	0	5	0	2	54000	1700	44	1	0.7	1	18.6851	1	1.18024	2.15333	2	0	0	0	0	1	0	0	FALSE	FALSE	FALSE	FALSE	FALSE	FALSE
62	77	61	16	99	100	99	1	14	24	1	23	76	98	67	31	34	0	0	0	2	70000	1650	73	0	0.63	0	25.7117	0	0.9655	4.93333	2	1	0	0	0	1	0	0	FALSE	FALSE	FALSE	FALSE	FALSE	FALSE
72	97	64	33	100	100	100	0	15	34	1	33	61	79	47	32	44	0	0	0	2	54000	1550	54	0	0.62	0	22.4766	1	1.00234	5.1	2	0	0	0	0	NA	1	0	FALSE	FALSE	TRUE	FALSE	FALSE	FALSE
72	109	63	46	99	100	96	4	13	71	1	70	59	69	53	16	50	0	0	0	2	99000	1850	33	1	0.6	0	28.9262	0	1.18796	3.46333	3	1	0	1	0	0	1	0	TRUE	FALSE	TRUE	FALSE	FALSE	FALSE
90	108	62	46	94	98	81	17	19	43	1	42	59	79	37	42	100	0	0	0	2	72000	1630	72	1	0.95	0	27.0993	1	1.17157	5.32	4	1	0	0	0	0	1	0	TRUE	TRUE	TRUE	FALSE	FALSE	FALSE
66	75	54	21	99	100	75	25	9	29	1	28	82	95	63	32	30	0	0	0	2	52000	1600	67	1	0.55	0	20.3125	1	1.17768	1.05	3	0	0	1	0	0	1	0	TRUE	TRUE	FALSE	FALSE	FALSE	FALSE
82	101	63	38	100	100	100	0	20	28	1	27	79	89	69	20	50	0	0	0	3	56000	1620	65	0	0.45	0	21.3382	1	0.910306	2.03	3	0	0	0	0	1	0	0	TRUE	FALSE	FALSE	FALSE	FALSE	FALSE
57	68	52	16	99	100	94	6	11	28	1	27	71	103	51	52	15	0	0	0	1	75000	1850	71	0	0.26	0	21.9138	0	1.00274	3.76333	1	0	0	0	0	0	0	0	FALSE	FALSE	TRUE	FALSE	FALSE	FALSE
100	117	75	42	99	99	99	0	19	30	1	29	85	94	82	12	50	0	0	0	1	50000	1610	26	0	0.51	0	19.2894	1	1.00414	3.59667	1	0	0	0	0	0	0	0	FALSE	FALSE	FALSE	FALSE	FALSE	FALSE
81	119	49	70	99	100	98	2	18	25	1	24	65	85	55	30	40	0	0	0	2	87000	1800	53	0	0.33	0	26.8519	0	0.971391	2.94667	1	0	0	0	0	0	0	0	FALSE	FALSE	TRUE	TRUE	FALSE	FALSE
62	81	42	39	99	100	83	17	19	42	1	41	62	78	53	25	40	0	0	0	2	63000	1750	23	0	0.38	0	20.5714	1	1.06158	2.63333	1	0	0	0	0	0	0	0	FALSE	TRUE	TRUE	TRUE	FALSE	FALSE
69	111	54	57	100	100	100	0	21	48	1	47	55	90	42	48	40	0	0	0	2	73000	1810	21	0	0.57	0	22.2826	0	1.00381	1.95333	2	0	0	1	0	0	0	0	FALSE	FALSE	TRUE	FALSE	FALSE	FALSE
96	121	86	35	99	100	86	14	25	50	1	49	56	76	45	31	40	0	0	0	2	39000	1580	19	1	0.47	0	15.6225	1	1.06144	1.93667	1	0	0	0	0	1	0	0	FALSE	TRUE	TRUE	FALSE	TRUE	FALSE
88	105	73	32	98	100	73	27	18	40	1	39	92	114	76	38	54	0	0	0	2	115000	1800	53	1	0.43	0	35.4938	1	1.25345	1.64667	3	0	0	0	0	0	1	0	TRUE	TRUE	FALSE	FALSE	FALSE	TRUE
88	111	62	49	99	100	95	5	14	30	1	29	87	101	74	27	35	0	0	0	2	65000	1600	55	0	0.37	0	25.3906	1	1.00484	2.13667	1	0	0	0	0	0	1	0	FALSE	FALSE	FALSE	FALSE	FALSE	FALSE
72	83	61	22	99	100	98	2	9	19	1	18	86	118	75	43	59	0	0	0	2	95000	1930	73	0	0.58	0	25.504	0	0.964732	1.94667	1	1	0	1	0	0	1	0	FALSE	FALSE	FALSE	FALSE	FALSE	TRUE
80	105	65	40	100	100	100	0	10	29	1	28	86	103	74	29	47	0	0	0	2	64000	1690	56	0	0.37	0	22.4082	0	0.959835	1.97	1	0	0	0	0	0	1	0	FALSE	FALSE	FALSE	FALSE	FALSE	FALSE
80	94	66	28	98	100	84	16	14	56	1	55	84	101	77	24	47	0	0	0	3	75000	1660	63	1	0.43	0	27.2173	1	1.12706	1.43333	3	1	0	0	0	0	1	0	TRUE	TRUE	FALSE	FALSE	FALSE	FALSE
60	73	51	22	100	100	100	0	11	20	1	19	99	118	87	31	30	0	0	0	2	85000	1760	65	0	0.33	0	27.4406	0	0.970602	0.996667	2	0	0	1	0	0	1	0	FALSE	FALSE	FALSE	FALSE	FALSE	TRUE
79	87	74	13	100	100	100	0	20	28	2	26	56	59	54	5	50	0	0	0	2	58000	1640	26	0	0.15	0	21.5645	1	1.05474	2.01667	2	0	0	0	0	0	1	0	FALSE	FALSE	TRUE	FALSE	FALSE	FALSE
67	87	62	25	99	100	99	1	10	33	1	32	64	69	62	7	50	0	0	0	2	82000	1920	60	0	0.28	0	22.2439	0	0.958436	1.76667	1	0	0	0	0	0	1	1	FALSE	FALSE	FALSE	FALSE	FALSE	FALSE
51	77	46	31	99	100	97	3	9	18	2	16	73	80	66	14	40	0	0	0	2	62000	1700	61	1	0.32	0	21.4533	1	0.981133	1.93667	NA	0	0	0	0	0	1	0	NA	FALSE	FALSE	TRUE	FALSE	FALSE
73	85	63	22	100	100	100	0	20	35	1	34	104	120	96	24	40	0	0	0	2	55000	1730	62	0	0.52	0	18.3768	1	0.983715	1.9	1	0	0	0	0	1	1	0	FALSE	FALSE	FALSE	FALSE	FALSE	TRUE
76	82	62	20	99	100	88	12	17	26	1	25	73	93	62	31	55	0	0	0	2	115000	1840	56	0	0.43	0	33.9674	0	1.01576	1.3	3	1	0	0	1	0	1	0	TRUE	TRUE	FALSE	FALSE	FALSE	FALSE
61	69	52	17	99	100	86	14	5	22	1	21	68	82	61	21	30	0	0	0	2	66000	1710	67	1	0.4	0	22.571	0	1.03648	1.45333	1	0	0	0	0	0	1	0	FALSE	TRUE	FALSE	FALSE	FALSE	FALSE
64	81	60	21	99	100	98	2	16	32	2	30	63	78	54	24	50	0	0	0	2	110000	1740	69	0	0.39	0	36.3324	0	1.02287	2.02	2	0	0	0	1	0	1	1	FALSE	FALSE	TRUE	FALSE	FALSE	FALSE
81	152	67	85	100	100	100	0	21	33	1	32	86	88	83	5	50	0	0	0	2	57000	1600	89	0	0.41	0	22.2656	1	0.930757	1.53	2	1	1	0	0	0	0	0	FALSE	FALSE	FALSE	FALSE	TRUE	FALSE
72	93	63	30	99	100	98	2	14	29	1	28	81	84	79	5	60	0	0	0	2	70000	1600	67	0	0.41	0	27.3438	1	0.979774	1.83	1	1	0	1	0	0	1	1	FALSE	FALSE	FALSE	FALSE	FALSE	FALSE
66	71	63	8	100	100	100	0	16	21	9	12	73	73	73	0	50	0	0	0	2	74000	1800	87	0	0.16	0	22.8395	1	0.933674	0.796667	NA	1	0	1	0	NA	0	0	NA	FALSE	FALSE	FALSE	FALSE	FALSE
69	86	60	26	100	100	100	0	14	27	1	26	100	109	85	24	50	0	0	0	2	79000	1860	47	0	0.36	0	22.835	0	0.965432	2.59667	2	0	0	0	0	0	1	0	FALSE	FALSE	FALSE	FALSE	FALSE	TRUE
89	119	77	42	94	100	82	18	16	36	1	35	77	123	56	67	30	0	0	0	2	115000	1820	85	0	0.53	0	34.718	0	1.02147	2.49667	1	1	0	0	1	0	1	0	FALSE	TRUE	FALSE	FALSE	FALSE	TRUE
64	88	58	30	100	100	100	0	13	21	1	20	78	82	74	8	50	0	0	0	2	40000	1550	72	0	0.35	0	16.6493	1	0.958004	1.80333	2	0	0	0	0	0	1	0	FALSE	FALSE	FALSE	FALSE	FALSE	FALSE
51	62	36	26	99	100	99	1	10	22	1	21	68	83	59	24	50	0	0	0	2	83000	1790	62	0	0.32	0	25.9043	0	0.966963	1.75333	1	0	0	0	0	0	1	0	FALSE	FALSE	FALSE	TRUE	FALSE	FALSE
75	135	60	75	99	100	96	4	21	33	1	32	88	101	77	24	40	0	0	0	2	98000	1650	67	0	0.46	0	35.9963	1	0.984876	1.46333	2	0	0	1	0	0	1	0	FALSE	FALSE	FALSE	FALSE	TRUE	FALSE
72	84	66	18	99	100	97	3	23	31	1	30	73	94	65	29	50	0	0	0	1	68000	1620	74	0	0.67	0	25.9107	1	0.93491	1.23667	2	1	0	0	0	0	1	1	FALSE	FALSE	FALSE	FALSE	FALSE	FALSE
79	93	72	21	99	100	95	5	12	36	2	34	70	94	52	42	40	0	0	0	2	106000	1730	89	0	0.32	0	35.4172	1	0.961154	0.583333	1	1	1	0	0	0	1	0	FALSE	FALSE	TRUE	FALSE	FALSE	FALSE
76	87	71	16	99	100	97	3	17	29	1	28	74	94	63	31	35	0	0	0	2	72000	1600	51	0	0.67	0	28.125	1	1.0068	4.13333	1	1	0	0	0	0	0	0	FALSE	FALSE	FALSE	FALSE	FALSE	FALSE
66	93	52	41	99	100	94	6	17	33	1	32	82	109	62	47	50	0	0	0	2	56000	1620	39	1	0.7	0	21.3382	1	1.33162	3.76333	3	0	0	0	0	0	0	0	TRUE	FALSE	FALSE	FALSE	FALSE	TRUE
68	87	63	24	98	100	96	4	20	39	3	36	82	95	70	25	40	0	0	0	2	90000	1750	66	0	0.35	0	29.3878	0	0.978402	3.03667	1	1	0	0	0	0	0	0	FALSE	FALSE	FALSE	FALSE	FALSE	FALSE
58	83	46	37	99	100	92	8	16	37	1	36	60	84	44	40	55	0	0	0	2	55000	1650	72	0	1.53	0	20.202	1	0.960832	3.7	1	1	1	0	0	1	1	1	FALSE	FALSE	TRUE	TRUE	FALSE	FALSE
63	72	56	16	99	100	97	3	11	64	1	63	73	105	47	58	60	0	0	0	2	81000	1650	64	0	1.02	0	29.7521	1	0.989942	2.7	2	1	0	0	0	0	0	0	FALSE	FALSE	TRUE	FALSE	FALSE	TRUE
103	130	97	33	99	100	98	2	16	29	1	28	83	105	66	39	50	0	0	0	2	90000	1800	61	0	1.14	0	27.7778	0	0.972388	2.67	2	1	0	0	0	0	0	1	FALSE	FALSE	FALSE	FALSE	TRUE	TRUE
72	81	70	11	100	100	100	0	21	32	1	31	70	144	53	91	18	0	0	0	2	113000	1670	88	0	0.5	0	40.5178	1	0.975068	1.53	2	1	1	0	0	0	0	0	FALSE	FALSE	TRUE	FALSE	FALSE	TRUE
76	93	65	28	99	100	97	3	13	24	1	23	80	105	68	37	35	0	0	0	2	82000	1720	37	1	0.64	0	27.7177	1	1.00895	2.18667	1	0	0	0	0	0	1	0	FALSE	FALSE	FALSE	FALSE	FALSE	TRUE
62	79	57	22	99	100	95	5	13	21	1	20	73	114	63	51	35	0	0	0	2	70000	1570	69	0	0.35	0	28.3987	0	0.976885	3.69667	3	0	0	0	0	0	1	0	TRUE	FALSE	FALSE	FALSE	FALSE	TRUE
69	91	64	27	98	100	96	4	19	35	1	34	70	87	56	31	88	0	0	0	2	98000	1810	68	1	0.65	0	29.9136	0	1.05771	2.83	1	1	0	0	0	0	1	0	FALSE	FALSE	FALSE	FALSE	FALSE	FALSE
72	89	59	30	99	100	96	4	19	28	1	27	83	98	75	23	45	0	0	0	2	92000	1780	68	0	0.45	0	29.0367	0	0.977273	1.98333	2	0	0	0	0	0	1	0	FALSE	FALSE	FALSE	FALSE	FALSE	FALSE
65	91	54	37	100	100	100	0	12	37	1	36	86	102	71	31	48	0	0	0	2	74000	1750	50	1	0.5	0	24.1633	0	1.07933	1.93333	1	0	0	0	0	0	1	0	FALSE	FALSE	FALSE	FALSE	FALSE	FALSE
92	104	76	28	99	100	97	3	18	33	1	32	98	119	75	44	48	0	0	0	2	75000	1580	65	0	0.47	0	30.0433	1	0.987909	1.45333	2	1	0	0	0	0	1	0	FALSE	FALSE	FALSE	FALSE	FALSE	TRUE
90	101	74	27	99	100	99	1	15	33	1	32	86	117	57	60	40	0	0	0	2	67000	1710	42	0	0.52	0	22.913	0	0.970026	2.47	2	0	0	0	0	1	0	0	FALSE	FALSE	FALSE	FALSE	FALSE	TRUE
91	113	43	70	99	100	98	2	21	34	1	33	73	103	54	49	40	0	0	0	2	82000	1680	78	0	0.55	0	29.0533	1	0.962682	2.23333	1	1	0	1	0	0	0	0	FALSE	FALSE	TRUE	TRUE	FALSE	FALSE
64	72	61	11	100	100	100	0	16	23	2	21	62	89	53	36	40	0	0	0	2	82000	1760	64	1	0.25	0	26.4721	0	1.05435	2.40333	2	1	0	0	0	0	0	0	FALSE	FALSE	TRUE	FALSE	FALSE	FALSE
97	120	80	40	100	100	100	0	18	25	2	23	69	108	53	55	70	0	0	0	2	56000	1680	23	0	0.95	0	19.8413	1	1.06168	3.75	1	0	0	0	0	0	0	0	FALSE	FALSE	TRUE	FALSE	TRUE	TRUE
67	85	61	24	100	100	100	0	15	25	1	24	53	102	41	61	40	0	0	0	3	67000	1770	68	0	0.48	0	21.3859	1	1.04251	2.78	1	0	0	0	0	0	0	0	FALSE	FALSE	TRUE	FALSE	FALSE	FALSE
70	88	64	24	99	100	99	1	20	43	1	42	60	71	47	24	42	0	0	0	2	39000	640	39	0	0.62	0	95.2148	0	0.944899	2.63667	1	0	0	0	0	1	0	1	FALSE	FALSE	TRUE	FALSE	FALSE	FALSE
55	64	49	15	100	100	100	0	12	18	1	17	70	88	63	25	38	0	0	0	2	72000	1700	63	0	0.44	0	24.9135	1	0.987598	2.20333	2	0	0	0	0	0	0	0	FALSE	FALSE	FALSE	TRUE	FALSE	FALSE
66	105	55	50	100	100	100	0	12	31	1	30	86	103	76	27	43	0	0	0	2	64000	1680	57	0	0.75	0	22.6757	1	0.971336	1.88667	4	0	0	0	0	0	0	0	TRUE	FALSE	FALSE	FALSE	FALSE	FALSE
73	95	65	30	99	100	99	1	19	25	1	24	63	79	52	27	28	0	0	0	2	76000	1620	64	0	0.45	0	28.959	1	0.990002	1.06667	2	1	0	0	0	0	0	0	FALSE	FALSE	TRUE	FALSE	FALSE	FALSE
79	91	65	26	100	100	100	0	15	34	2	32	66	83	51	32	40	0	0	0	2	54000	1610	53	0	0.57	0	20.8325	1	0.969466	4.52	3	0	0	0	0	0	1	1	TRUE	FALSE	TRUE	FALSE	FALSE	FALSE
96	110	87	23	100	100	100	0	18	37	2	35	89	104	67	37	45	0	0	0	2	59000	1640	61	0	0.5	0	21.9363	1	0.989863	3.43	1	0	0	1	0	0	0	0	FALSE	FALSE	FALSE	FALSE	FALSE	FALSE
94	122	68	54	99	100	97	3	19	45	2	43	84	124	29	95	45	0	0	0	2	49000	1700	62	0	0.71	0	16.955	1	0.98217	1.76333	1	0	0	0	0	0	0	0	FALSE	FALSE	TRUE	FALSE	TRUE	TRUE
61	111	54	57	100	100	100	0	13	27	1	26	81	102	57	45	45	0	0	0	3	65000	1620	76	0	0.45	0	24.7676	1	0.909561	1.58333	3	1	0	0	0	0	1	0	TRUE	FALSE	FALSE	FALSE	FALSE	FALSE
72	85	56	29	98	100	83	17	13	27	1	26	92	101	86	15	40	0	0	0	2	100000	1750	66	1	0.44	0	32.6531	0	1.0663	2.13667	1	0	0	0	0	0	1	0	FALSE	TRUE	FALSE	FALSE	FALSE	FALSE
87	105	73	32	99	100	99	1	13	24	2	22	86	101	77	24	40	0	0	0	2	61000	1600	63	0	0.26	0	23.8281	1	0.986371	1.54667	1	0	0	0	0	0	1	0	FALSE	FALSE	FALSE	FALSE	FALSE	FALSE
91	99	69	30	98	100	85	15	16	42	1	41	77	96	62	34	110	0	0	0	2	115000	1680	75	1	1.05	0	40.7455	0	1.00731	2.06333	4	0	0	0	1	0	1	0	TRUE	TRUE	FALSE	FALSE	FALSE	FALSE
74	95	61	34	99	100	91	9	10	33	1	32	72	97	59	38	40	0	0	0	3	51000	1590	69	1	0.47	0	20.1733	1	1.03595	1.61667	4	0	0	0	0	0	1	0	TRUE	FALSE	FALSE	FALSE	FALSE	FALSE
66	82	51	31	100	100	100	0	15	35	1	34	78	96	63	33	60	0	0	0	2	95000	1870	79	0	0.42	0	27.1669	0	0.969777	1.47	2	0	0	0	0	0	1	0	FALSE	FALSE	FALSE	FALSE	FALSE	FALSE
72	86	64	22	100	100	100	0	13	21	1	20	56	67	52	15	50	0	0	0	2	60000	1650	34	1	0.28	0	22.0386	1	1.02164	3.39667	2	0	0	0	0	1	1	0	FALSE	FALSE	TRUE	FALSE	FALSE	FALSE
63	72	53	19	100	100	100	0	16	42	1	41	74	90	62	28	50	0	0	0	2	68000	1660	55	0	0.43	0	24.677	0	0.965098	4.73333	2	0	0	0	0	0	1	1	FALSE	FALSE	FALSE	FALSE	FALSE	FALSE
75	93	60	33	99	100	98	2	10	46	1	45	76	99	50	49	40	0	0	0	2	75000	1700	60	1	1.49	0	25.9516	0	1.0585	4.18667	1	0	0	0	0	1	1	1	FALSE	FALSE	TRUE	FALSE	FALSE	FALSE
54	70	42	28	100	100	100	0	13	37	1	36	63	69	58	11	40	0	0	0	2	80000	1770	70	0	0.28	0	25.5354	0	0.964745	2.11667	1	1	1	0	0	0	0	0	FALSE	FALSE	FALSE	TRUE	FALSE	FALSE
73	84	66	18	100	100	100	0	14	50	2	48	76	89	66	23	40	0	0	0	2	87000	1770	43	1	0.51	0	27.7698	1	1.1758	1.73	NA	NA	NA	NA	NA	NA	1	0	NA	FALSE	FALSE	FALSE	FALSE	FALSE
85	93	67	26	95	99	93	6	9	14	1	13	69	89	59	30	30	0	5	0	2	85000	1710	83	0	0.25	1	29.0688	0	1.01911	2.62	1	1	0	1	0	0	1	0	FALSE	FALSE	FALSE	FALSE	FALSE	FALSE
75	85	59	26	98	100	93	7	10	39	1	38	79	91	69	22	40	0	5	0	2	95000	1770	81	0	0.38	1	30.3233	0	1.01122	2.26667	2	0	0	0	0	0	1	0	FALSE	FALSE	FALSE	FALSE	FALSE	FALSE
60	62	60	2	98	100	94	6	7	14	1	13	85	91	82	9	30	0	5	0	2	100000	1660	75	0	0.35	1	36.2897	0	0.969616	2.58333	1	1	0	0	0	0	1	0	FALSE	FALSE	FALSE	FALSE	FALSE	FALSE
66	79	60	19	98	100	85	15	9	23	1	22	78	91	72	19	40	0	0	0.5	1	85000	1680	55	0	0.27	2	30.1162	1	6.89347	1.91667	2	1	0	0	0	0	1	0	FALSE	TRUE	FALSE	FALSE	FALSE	FALSE
72	94	58	36	99	100	93	7	9	28	2	26	78	143	65	78	40	0	0	0.5	2	70000	1750	65	1	0.61	2	22.8571	0	0.34748	1.44667	2	1	0	0	0	0	1	0	FALSE	FALSE	FALSE	FALSE	FALSE	TRUE
66	90	51	39	100	100	100	0	10	18	2	16	58	75	47	28	30	0	5	0	2	70000	1540	58	0	0.45	1	29.5159	1	0.860565	3.12	2	1	0	0	0	1	0	0	FALSE	FALSE	TRUE	FALSE	FALSE	FALSE
76	92	61	31	100	100	100	0	16	24	2	22	78	87	66	21	30	0	5	0	2	55000	1800	25	0	0.27	1	16.9753	0	0.965529	2.73333	1	0	0	0	0	1	0	0	FALSE	FALSE	FALSE	FALSE	FALSE	FALSE
80	102	68	34	100	100	100	0	14	27	1	26	86	114	70	44	100	0	0	0	1	110000	1830	42	0	0.92	0	32.8466	0	0.972884	2.8	1	0	0	1	0	1	0	0	FALSE	FALSE	FALSE	FALSE	FALSE	TRUE
93	105	79	26	99	100	96	4	11	34	1	33	106	118	88	30	50	0	0	0	2	50000	1600	53	1	0.4	0	19.5312	1	0.989566	1.24667	1	0	0	0	0	0	1	0	FALSE	FALSE	FALSE	FALSE	FALSE	TRUE
79	88	73	15	99	100	96	4	12	29	1	28	71	80	62	18	50	0	0	0	2	88000	1630	72	0	0.35	0	33.1213	0	0.983138	1.79667	1	1	1	0	0	0	0	0	FALSE	FALSE	FALSE	FALSE	FALSE	FALSE
86	105	70	35	100	100	100	0	9	22	1	21	78	91	65	26	100	0	0	0	2	67000	1720	49	0	0.52	0	22.6474	1	1.01193	2.37	1	0	0	1	0	0	0	0	FALSE	FALSE	FALSE	FALSE	FALSE	FALSE
92	120	82	38	99	100	97	3	16	27	1	26	72	98	60	38	150	0	0	0	2	90000	1760	35	0	1.23	0	29.0548	1	1.01137	4.09667	NA	NA	NA	NA	NA	NA	0	0	NA	FALSE	FALSE	FALSE	TRUE	FALSE
75	107	67	40	99	100	98	2	16	31	1	30	62	87	52	35	50	0	0	0	2	70000	1650	32	0	0.36	0	25.7117	1	1.03692	2.74667	2	0	0	0	0	1	0	0	FALSE	FALSE	TRUE	FALSE	FALSE	FALSE
80	95	65	30	99	100	97	3	17	26	1	25	72	116	43	73	100	0	0	0	2	66000	1780	30	0	0.52	0	20.8307	0	0.989966	2.26667	2	0	0	0	0	1	0	0	FALSE	FALSE	TRUE	FALSE	FALSE	TRUE
63	95	54	41	100	100	100	0	12	21	1	20	72	95	61	34	50	0	0	0	2	66000	1600	68	0	0.55	0	25.7812	1	0.959463	2.19667	3	0	1	0	0	0	1	0	TRUE	FALSE	FALSE	FALSE	FALSE	FALSE
78	102	73	29	99	100	98	2	8	17	1	16	78	99	66	33	10	0	0	0	3	49000	1590	70	0	0.39	0	19.3821	1	1.03133	2.62	1	0	0	0	0	0	1	0	FALSE	FALSE	FALSE	FALSE	FALSE	FALSE
87	112	75	37	100	100	100	0	12	29	1	28	62	71	53	18	50	0	5	0	2	72000	1740	37	0	0.43	1	23.7812	1	0.743453	2.45	1	0	0	0	0	0	0	0	FALSE	FALSE	TRUE	FALSE	FALSE	FALSE
80	96	66	30	100	100	100	0	10	24	1	23	57	74	50	24	50	0	5	0	2	70000	1770	63	0	0.55	1	22.3435	0	1.16665	1.55333	2	0	0	0	0	0	0	0	FALSE	FALSE	TRUE	FALSE	FALSE	FALSE
66	91	60	31	99	100	98	2	13	18	1	17	70	73	68	5	50	0	5	0	3	68000	1770	39	0	0.36	1	21.7051	0	0.979326	1.91333	1	0	0	0	0	1	1	1	FALSE	FALSE	FALSE	FALSE	FALSE	FALSE
78	95	71	24	99	100	96	4	13	36	1	35	66	79	61	18	40	0	0	0	2	79000	1630	44	1	0.33	0	29.7339	1	1.00079	1.93	1	0	0	0	0	0	0	0	FALSE	FALSE	FALSE	FALSE	FALSE	FALSE
56	68	53	15	100	100	100	0	11	17	1	16	80	95	69	26	40	0	5	0	2	72000	1760	59	0	0.58	1	23.2438	0	1.15971	2.96333	2	1	0	1	0	0	1	1	FALSE	FALSE	FALSE	FALSE	FALSE	FALSE
62	73	53	20	99	100	99	1	15	31	1	30	60	79	49	30	100	0	0	0	2	58000	1680	44	1	0.57	0	20.5499	1	1.00503	3.37	1	0	0	0	0	0	0	0	FALSE	FALSE	TRUE	FALSE	FALSE	FALSE
68	82	61	21	100	100	100	0	16	30	1	29	80	132	63	69	50	0	0	0	2	50000	1580	39	0	0.35	0	20.0288	1	1.027	2.07	2	0	0	0	0	1	0	0	FALSE	FALSE	FALSE	FALSE	FALSE	TRUE
67	81	62	19	94	100	88	12	19	56	1	55	80	99	74	25	40	0	0	0	1	108000	1690	71	1	0.51	0	37.8138	0	0.937026	2.21333	1	1	0	1	1	0	0	0	FALSE	TRUE	FALSE	FALSE	FALSE	FALSE
68	76	58	18	94	96	93	3	12	25	2	23	76	86	70	16	40	0	0	0	2	85000	1830	69	0	0.41	0	25.3815	0	0.964485	2.24667	1	0	0	0	0	0	0	0	FALSE	FALSE	FALSE	FALSE	FALSE	FALSE
87	113	74	39	99	100	93	7	24	36	2	34	82	103	71	32	90	0	0	0	2	107000	1580	64	0	0.65	0	42.8617	1	0.990263	2.58333	2	1	0	0	0	0	0	0	FALSE	FALSE	FALSE	FALSE	FALSE	FALSE
58	65	54	11	99	100	97	3	8	26	1	25	76	131	58	73	10	0	0	0	2	78000	1600	75	1	0.47	0	30.4688	1	0.928788	2.25	1	0	0	1	1	0	1	0	FALSE	FALSE	FALSE	FALSE	FALSE	TRUE
55	76	50	26	100	100	100	0	14	58	1	57	76	104	67	37	40	0	3	0	2	75000	1740	71	0	0.32	1	24.7721	0	0.665413	2.25333	2	1	0	0	1	0	1	1	FALSE	FALSE	FALSE	TRUE	FALSE	FALSE
75	85	64	21	96	100	96	4	20	33	1	32	91	99	78	21	50	0	0	3.5	2	82000	1660	47	1	0.45	2	29.7576	1	0.387128	1.73333	1	0	0	1	0	1	1	1	FALSE	FALSE	FALSE	FALSE	FALSE	FALSE
79	92	73	19	100	100	100	0	15	29	1	28	104	113	96	17	50	0	5	0	3	90000	1770	70	0	0.5	1	28.7274	1	0.550331	1.08333	2	0	0	0	0	0	0	0	FALSE	FALSE	FALSE	FALSE	FALSE	TRUE
90	95	81	14	99	100	90	10	15	21	1	20	107	117	99	18	50	0	0	0	2	95000	1700	67	0	0.6	0	32.872	1	1.08047	2.93333	1	1	0	1	1	1	1	0	FALSE	TRUE	FALSE	FALSE	FALSE	TRUE
78	86	69	17	99	100	91	9	11	32	1	31	104	118	87	31	50	0	0	0	3	98000	1700	76	0	0.31	0	33.91	1	1.12141	2.28	2	1	0	0	0	0	1	0	FALSE	FALSE	FALSE	FALSE	FALSE	TRUE
69	82	52	30	99	100	99	1	13	24	1	23	90	100	80	20	50	0	0	0	2	78000	1670	65	0	0.52	0	27.968	1	0.970702	1.88333	3	0	0	0	0	0	1	0	TRUE	FALSE	FALSE	FALSE	FALSE	FALSE
98	104	77	27	100	100	100	0	15	23	1	22	83	89	70	19	50	0	0	0	3	75000	1730	64	0	0.32	0	25.0593	0	0.954826	1.65	2	1	1	1	0	1	1	0	FALSE	FALSE	FALSE	FALSE	FALSE	FALSE
82	100	69	31	99	100	91	9	9	24	1	23	70	99	53	46	50	0	0	0	2	55000	1560	87	0	0.61	0	22.6003	0	0.920712	2.06333	NA	NA	NA	NA	NA	NA	1	0	NA	FALSE	TRUE	FALSE	FALSE	FALSE
81	93	67	26	99	100	97	3	16	24	1	23	93	105	77	28	50	0	0	0	2	53000	1560	60	0	0.51	0	21.7784	1	0.991808	2.24667	2	1	0	1	0	1	0	0	FALSE	FALSE	FALSE	FALSE	FALSE	TRUE
64	87	43	44	100	100	100	0	17	30	2	28	74	100	64	36	40	0	0	0	2	65000	1630	63	0	0.45	0	24.4646	1	0.987081	1.76333	1	0	0	0	0	0	0	0	FALSE	FALSE	FALSE	TRUE	FALSE	FALSE
113	126	94	32	99	100	81	19	9	21	1	20	79	103	47	56	10	0	0	0	2	88000	1660	59	1	0.83	0	31.935	1	1.16283	1.93	NA	NA	NA	NA	NA	NA	1	0	NA	TRUE	TRUE	FALSE	TRUE	FALSE
54	76	46	30	99	100	96	4	11	52	2	50	82	108	70	38	25	0	0	0.5	2	68000	1660	69	1	0.4	2	24.677	0	0.357993	1.58	1	0	0	1	0	0	0	0	FALSE	FALSE	FALSE	TRUE	FALSE	TRUE
76	95	66	29	100	100	100	0	14	21	1	20	87	104	72	32	10	0	0	0	2	66000	1690	53	0	1.21	0	23.1084	1	1.00521	3.66333	1	0	1	1	0	0	1	0	FALSE	FALSE	FALSE	FALSE	FALSE	FALSE
61	84	55	29	99	100	94	6	12	17	2	15	83	115	69	46	40	0	0	0	2	75000	1620	52	1	0.45	0	28.578	1	1.00131	3.94667	2	1	0	0	0	0	0	0	FALSE	FALSE	FALSE	FALSE	FALSE	TRUE
70	80	67	13	97	100	90	10	10	20	1	19	58	92	45	47	40	0	0	0	2	72000	1660	59	1	0.54	0	26.1286	1	1.22707	2.68667	3	1	0	0	0	0	0	0	TRUE	TRUE	TRUE	FALSE	FALSE	FALSE
66	94	54	40	97	99	84	15	10	56	1	55	81	121	58	63	45	0	0	0	3	68000	1600	69	0	0.91	0	26.5625	1	1.07585	3.93	NA	1	0	0	0	0	1	0	NA	TRUE	FALSE	FALSE	FALSE	TRUE
65	74	59	15	97	100	92	8	16	32	1	31	82	104	66	38	48	0	0	0	1	90000	1850	62	1	0.6	0	26.2966	0	1.02076	2.97	1	0	0	0	0	0	1	0	FALSE	FALSE	FALSE	FALSE	FALSE	FALSE
56	85	38	47	99	100	95	5	18	33	1	32	80	152	53	99	43	0	0	0	3	50000	1600	84	0	0.54	0	19.5312	1	0.993298	1.08667	1	1	1	0	0	0	0	0	FALSE	FALSE	TRUE	TRUE	FALSE	TRUE
66	76	62	14	99	100	95	5	9	15	1	14	94	107	85	22	30	0	0	0	1	90000	1720	74	0	0.33	0	30.4218	0	0.989272	2.3	1	1	0	0	0	0	0	0	FALSE	FALSE	FALSE	FALSE	FALSE	TRUE
71	87	57	30	99	100	99	1	19	49	1	48	74	142	47	95	30	0	0	0	2	35000	1590	72	1	0.88	0	13.8444	1	0.947228	3.08	1	0	1	0	0	0	0	0	FALSE	FALSE	TRUE	FALSE	FALSE	TRUE
73	89	61	28	100	100	100	0	14	36	1	35	70	108	58	50	40	0	0	0	2	56000	1640	53	1	0.68	0	20.8209	1	0.991066	2.36667	1	0	0	0	0	1	0	0	FALSE	FALSE	FALSE	FALSE	FALSE	TRUE
76	96	65	31	99	100	96	4	9	24	1	23	83	111	61	50	70	0	0	0	2	76000	1710	56	1	0.42	0	25.9909	1	0.998181	1.66667	2	1	0	0	0	1	NA	NA	FALSE	FALSE	FALSE	FALSE	FALSE	TRUE
77	105	37	68	100	100	100	0	8	48	1	47	73	89	63	26	50	0	0	0	2	80000	1600	71	0	0.48	0	31.25	1	0.974709	1.88	1	1	0	0	0	1	0	0	FALSE	FALSE	FALSE	TRUE	FALSE	FALSE
78	93	59	34	98	100	95	5	11	24	1	23	82	104	71	33	40	0	0	0	2	59000	1670	66	0	0.48	0	21.1553	1	0.97606	2.14667	2	0	0	0	0	0	1	0	FALSE	FALSE	FALSE	FALSE	FALSE	FALSE
106	138	85	53	99	100	99	1	11	26	1	25	82	93	72	21	40	0	0	0	2	50000	1540	52	0	0.68	0	21.0828	1	1.00354	1.76667	2	0	0	0	0	0	1	0	FALSE	FALSE	FALSE	FALSE	TRUE	FALSE
61	116	42	74	100	100	100	0	15	38	1	37	74	121	59	62	43	0	0	0	1	47000	1550	34	0	0.85	0	19.563	1	0.988991	3.15333	2	0	0	1	0	0	0	0	FALSE	FALSE	FALSE	TRUE	FALSE	TRUE
90	110	64	46	100	100	100	0	15	44	1	43	60	89	39	50	100	0	0	0	2	70000	1750	23	0	0.52	0	22.8571	0	1.00283	2.27	1	0	0	0	0	0	0	0	FALSE	FALSE	TRUE	FALSE	FALSE	FALSE
88	114	67	47	99	100	99	1	15	33	1	32	78	105	61	44	45	0	0	0	2	77000	1640	22	1	0.49	0	28.6288	1	1.01537	2.95333	2	0	0	1	0	0	1	0	FALSE	FALSE	FALSE	FALSE	FALSE	TRUE
69	86	62	24	97	100	93	7	13	41	1	40	67	80	61	19	50	0	0	0	2	97000	1680	77	0	0.36	0	34.3679	1	0.976719	1.46333	1	1	0	0	0	0	1	0	FALSE	FALSE	FALSE	FALSE	FALSE	FALSE
79	96	64	32	95	100	80	20	12	62	1	61	80	101	60	41	50	0	0	0	2	82000	1670	74	1	0.55	0	29.4023	0	1.13052	2.47	3	1	0	0	0	0	1	0	TRUE	TRUE	FALSE	FALSE	FALSE	FALSE
78	91	68	23	99	100	76	24	18	29	1	28	67	73	63	10	30	0	0	0	2	65000	1630	72	0	0.56	0	24.4646	1	0.96481	4.48	1	1	0	0	0	1	0	1	FALSE	TRUE	FALSE	FALSE	FALSE	FALSE
86	104	69	35	100	100	100	0	20	35	2	33	110	116	102	14	40	0	0	0	3	72000	1600	48	0	0.47	0	28.125	1	1.126	3.9	2	0	0	0	0	0	0	0	FALSE	FALSE	FALSE	FALSE	FALSE	TRUE
79	106	73	33	99	100	99	1	13	23	1	22	83	109	71	38	30	0	0	0	2	75000	1780	61	0	0.39	0	23.6713	0	0.961383	1.42	2	0	0	0	0	0	0	0	FALSE	FALSE	FALSE	FALSE	FALSE	TRUE
81	88	66	22	99	100	97	3	18	26	2	24	72	90	61	29	49	0	0	0	2	61000	1690	60	0	0.7	0	21.3578	0	0.956562	2.29667	1	1	0	1	0	0	0	1	FALSE	FALSE	FALSE	FALSE	FALSE	FALSE
68	72	60	12	91	98	89	9	6	19	1	18	77	91	61	30	100	0	0	0	2	90000	1750	69	1	0.7	0	29.3878	0	1.05366	2.43	1	0	0	1	0	0	0	0	FALSE	TRUE	FALSE	FALSE	FALSE	FALSE
73	85	66	19	99	100	96	4	9	19	1	18	67	101	44	57	100	0	0	0	1	62000	1560	68	1	0.77	0	25.4767	1	0.963518	2.28667	2	1	0	1	0	0	0	0	FALSE	FALSE	TRUE	FALSE	FALSE	FALSE
84	98	58	40	100	100	99	1	7	17	1	16	57	91	47	44	100	0	0	0	2	72000	1720	57	1	0.59	0	24.3375	0	1.0615	2.05333	1	0	0	0	0	0	1	0	FALSE	FALSE	TRUE	FALSE	FALSE	FALSE
80	92	75	17	99	100	99	1	8	16	1	15	97	124	86	38	50	0	0	0	2	104000	1800	57	0	0.32	0	32.0988	0	0.989376	1.45333	1	0	0	0	0	1	0	0	FALSE	FALSE	FALSE	FALSE	FALSE	TRUE
64	96	55	41	100	100	100	0	19	39	1	38	72	93	59	34	50	0	0	0	2	58000	1590	36	1	0.57	0	22.9421	1	1.01743	3.05333	1	0	0	0	0	0	1	0	FALSE	FALSE	FALSE	FALSE	FALSE	FALSE
84	102	74	28	99	100	96	4	21	50	1	49	58	91	40	51	100	0	0	0	1	102000	1650	47	1	0.69	0	37.4656	1	0.995133	4.57	1	0	0	0	0	0	0	0	FALSE	FALSE	TRUE	FALSE	FALSE	FALSE
81	97	56	41	99	100	90	10	14	40	1	39	98	122	84	38	20	0	0	0	1	68000	1530	77	1	1.06	0	29.0487	1	0.95716	3.51333	2	1	0	0	0	0	1	1	FALSE	TRUE	FALSE	FALSE	FALSE	TRUE
62	82	46	36	100	100	100	0	15	25	1	24	75	83	67	16	50	0	0	0	1	54000	1570	40	1	0.85	0	21.9076	1	0.996385	3.83	1	0	0	0	0	0	1	0	FALSE	FALSE	FALSE	TRUE	FALSE	FALSE
73	90	61	29	99	100	98	2	16	25	1	24	80	93	70	23	50	0	0	0	2	69000	1640	59	0	0.47	0	25.6544	1	0.999869	2.96667	1	0	0	0	0	0	1	0	FALSE	FALSE	FALSE	FALSE	FALSE	FALSE
44	67	37	30	100	100	100	0	13	18	1	17	66	70	63	7	50	0	0	0	2	74000	1670	65	0	0.3	0	26.5338	0	0.967873	3.16667	3	0	0	0	0	0	0	1	TRUE	FALSE	FALSE	TRUE	FALSE	FALSE
73	94	43	51	99	100	80	20	25	40	1	39	72	133	39	94	100	0	0	0	2	110000	1700	46	0	0.62	0	38.0623	1	1.00234	2.86667	1	1	0	0	0	0	0	0	FALSE	TRUE	TRUE	TRUE	FALSE	TRUE
69	84	62	22	99	100	97	3	14	28	1	27	72	91	60	31	50	0	0	0	2	74000	1680	94	0	0.3	0	26.2188	0	0.9561	0.646667	1	1	1	0	0	0	0	0	FALSE	FALSE	FALSE	FALSE	FALSE	FALSE
64	85	54	31	100	100	100	0	19	50	1	49	55	69	45	24	50	0	0	0	1	83000	1720	40	1	0.64	0	28.0557	1	0.997182	2.68667	1	0	0	0	0	0	0	0	FALSE	FALSE	TRUE	FALSE	FALSE	FALSE
83	106	68	38	100	100	100	0	17	31	2	29	69	78	61	17	100	0	0	0	1	88000	16520	23	0	0.47	0	0.32245	1	0.944462	0.903333	NA	NA	NA	NA	NA	NA	1	0	NA	FALSE	FALSE	FALSE	FALSE	FALSE
66	83	61	22	93	98	91	7	11	25	1	24	67	109	56	53	100	0	0	0	1	60000	1600	60	1	0.75	0	23.4375	1	0.944723	1.13333	3	0	0	1	1	1	0	1	TRUE	FALSE	FALSE	FALSE	FALSE	TRUE
73	80	65	15	100	100	100	0	19	38	2	36	84	94	74	20	45	0	0	0	2	84000	1910	67	0	0.3	0	23.0257	0	0.958994	1.71333	2	0	1	0	0	1	1	0	FALSE	FALSE	FALSE	FALSE	FALSE	FALSE
64	80	58	22	99	100	95	5	19	24	2	22	73	82	67	15	40	0	0	0	2	68000	1590	37	1	0.36	0	26.8977	1	1.01004	2.41333	2	0	0	0	0	0	1	0	FALSE	FALSE	FALSE	FALSE	FALSE	FALSE
77	88	44	44	99	100	74	26	9	44	1	43	88	104	73	31	30	0	0	0.5	2	92000	1860	64	1	0.49	2	26.5927	0	0.270792	2.05333	4	1	0	1	0	0	1	0	TRUE	TRUE	FALSE	TRUE	FALSE	FALSE
87	113	74	39	99	100	89	11	14	43	1	42	83	167	51	116	40	0	5	0	2	84000	1750	40	1	0.53	1	27.4286	0	0.631789	5.56333	3	0	0	0	0	0	1	0	TRUE	TRUE	TRUE	FALSE	FALSE	TRUE
65	76	60	16	99	100	93	7	12	27	1	26	78	137	61	76	40	0	0	0	2	68000	1580	54	1	0.45	0	27.2392	1	1.24704	4.00333	3	0	0	0	0	0	1	0	TRUE	FALSE	FALSE	FALSE	FALSE	TRUE
68	97	58	39	100	100	100	0	11	32	1	31	67	90	62	28	100	0	3	0	2	60000	1660	67	0	0.68	1	21.7738	1	0.942271	3.56333	1	1	0	0	0	0	1	1	FALSE	FALSE	FALSE	FALSE	FALSE	FALSE
85	120	68	52	99	100	97	3	7	17	1	16	74	90	64	26	80	0	0	0	2	86000	1640	42	1	0.52	0	31.975	1	0.99828	1.43667	1	0	0	0	0	0	1	0	FALSE	FALSE	FALSE	FALSE	TRUE	FALSE
70	85	62	23	99	100	96	4	12	31	2	29	75	89	61	28	35	0	0	0.5	2	90000	1600	59	1	0.54	2	35.1562	1	0.370137	1.72	1	1	0	0	0	0	1	0	FALSE	FALSE	FALSE	FALSE	FALSE	FALSE
90	101	71	30	100	100	100	0	17	33	2	31	71	77	60	17	25	0	0	0	2	58700	1540	86	1	0.13	0	24.7512	0	0.999594	1.33	1	0	1	0	0	0	1	0	FALSE	FALSE	FALSE	FALSE	FALSE	FALSE
83	94	73	21	99	100	97	3	14	32	1	31	64	79	53	26	40	0	0	0	2	55000	1570	62	1	0.6	0	22.3133	1	0.982354	3.53667	2	0	1	0	0	0	1	0	FALSE	FALSE	TRUE	FALSE	FALSE	FALSE
65	84	57	27	99	100	76	24	12	22	1	21	81	99	76	23	30	0	3	0	1	67000	1650	57	0	0.53	1	24.6097	0	0.872675	2.13333	1	1	0	1	0	0	1	0	FALSE	TRUE	FALSE	FALSE	FALSE	FALSE
89	104	80	24	98	100	95	5	13	35	1	34	90	99	86	13	40	0	0	0	2	75000	1680	60	0	0.42	0	26.5731	0	0.969161	2.03333	2	1	0	1	0	1	1	0	FALSE	FALSE	FALSE	FALSE	FALSE	FALSE
52	66	40	26	99	100	96	4	13	45	1	44	78	93	67	26	40	0	0	0	2	62000	1680	62	1	0.53	0	21.9671	0	1.0434	2.03333	1	0	0	0	0	0	1	0	FALSE	FALSE	FALSE	TRUE	FALSE	FALSE
72	78	67	11	98	100	85	15	9	49	1	48	74	83	68	15	40	0	3	0	1	79000	1730	74	0	0.71	1	26.3958	0	0.827024	2.08	2	1	0	1	0	0	1	0	FALSE	TRUE	FALSE	FALSE	FALSE	FALSE
75	81	69	12	98	100	95	5	12	23	1	22	90	104	78	26	40	0	3	0	2	69000	840	69	0	0.4	1	97.7891	0	1.28079	1.53	3	1	0	0	0	1	1	0	TRUE	FALSE	FALSE	FALSE	FALSE	FALSE
96	118	82	36	99	100	76	24	10	26	1	25	87	152	71	81	50	0	3	0	2	56000	1580	66	1	0.5	1	22.4323	1	1.44828	1.28667	1	0	0	0	0	0	0	0	FALSE	TRUE	FALSE	FALSE	FALSE	TRUE
79	101	69	32	99	100	92	8	14	23	1	22	91	104	86	18	26	0	0	0	2	81000	1900	69	1	0.74	0	22.4377	0	1.03309	4.97	1	0	0	0	0	0	0	1	FALSE	FALSE	FALSE	FALSE	FALSE	FALSE
93	104	67	37	99	100	96	4	32	52	2	50	95	119	77	42	47	0	0	0	2	72000	1670	73	0	0.6	0	25.8166	0	0.965891	2.93333	2	1	0	0	0	0	0	0	FALSE	FALSE	FALSE	FALSE	FALSE	TRUE
66	82	62	20	99	100	98	2	11	30	2	28	68	85	57	28	33	0	0	0	2	96000	1900	70	0	0.6	0	26.5928	0	0.942845	1.43	NA	NA	NA	NA	NA	NA	0	0	NA	FALSE	FALSE	FALSE	FALSE	FALSE
68	84	62	22	100	100	100	0	19	29	2	27	57	88	46	42	30	0	0	0	2	51000	1570	52	0	0.5	0	20.6905	1	1.00287	1.85	1	0	0	0	0	1	0	0	FALSE	FALSE	TRUE	FALSE	FALSE	FALSE
94	117	79	38	98	100	91	9	17	44	1	43	73	89	58	31	30	0	0	0.5	2	76000	1580	60	1	0.65	2	30.4438	1	0.369623	3.72	1	1	0	0	0	0	0	0	FALSE	FALSE	FALSE	FALSE	FALSE	FALSE
75	100	60	40	100	100	100	0	11	32	1	31	102	118	82	36	50	0	0	0	2	66000	1780	61	0	1.1	0	20.8307	0	0.955313	2.33333	2	0	0	0	0	0	1	0	FALSE	FALSE	FALSE	FALSE	FALSE	TRUE
72	85	60	25	100	100	100	0	15	26	2	24	83	95	73	22	50	0	0	0	1	78000	1850	63	0	0.46	0	22.7904	0	0.997867	1.88	1	0	0	0	0	0	1	0	FALSE	FALSE	FALSE	FALSE	FALSE	FALSE
72	99	66	33	99	100	94	6	10	25	1	24	75	105	64	41	40	0	0	0	2	60000	1580	67	1	0.7	0	24.0346	1	0.979956	1.90333	2	1	0	0	0	0	1	0	FALSE	FALSE	FALSE	FALSE	FALSE	TRUE
76	105	70	35	100	100	100	0	11	29	1	28	87	98	71	27	50	0	0	0	2	85000	1700	70	0	0.44	0	29.4118	1	0.966504	1.83667	3	1	0	0	0	0	1	0	TRUE	FALSE	FALSE	FALSE	FALSE	FALSE
93	99	80	19	99	100	87	13	16	31	1	30	97	106	80	26	50	0	0	0	2	71000	1660	86	1	0.68	0	25.7657	1	1.1136	2.3	3	0	0	0	0	0	1	0	TRUE	TRUE	FALSE	FALSE	FALSE	TRUE
72	81	69	12	99	100	93	7	17	23	2	21	71	78	65	13	30	0	0	0	2	80000	1850	66	0	0.25	0	23.3747	1	0.978084	2.11333	1	1	0	0	0	0	1	1	FALSE	FALSE	FALSE	FALSE	FALSE	FALSE
75	93	68	25	100	100	100	0	12	16	1	15	55	59	51	8	30	0	3	0	2	71000	1720	79	0	0.34	1	23.9995	1	1.16398	2.03667	2	0	0	0	0	0	0	0	FALSE	FALSE	TRUE	FALSE	FALSE	FALSE
67	72	64	8	99	100	96	4	10	18	2	16	74	86	68	18	40	0	3	0	2	46000	1640	68	0	0.45	1	17.1029	1	0.959289	2.21333	1	0	0	0	0	1	1	1	FALSE	FALSE	FALSE	FALSE	FALSE	FALSE
73	93	63	30	100	100	100	0	16	30	1	29	77	105	55	50	50	0	0	0	2	45000	1540	35	1	0.42	0	18.9745	1	1.02249	2.88667	1	1	0	1	0	0	1	0	FALSE	FALSE	TRUE	FALSE	FALSE	TRUE
63	92	49	43	100	100	100	0	14	28	1	27	91	105	76	29	30	0	5	0	1	60000	1770	44	0	0.33	1	19.1516	1	0.85006	2.36667	2	1	0	0	0	0	0	0	FALSE	FALSE	FALSE	TRUE	FALSE	TRUE
64	82	56	26	99	100	96	4	10	14	2	12	48	51	46	5	40	0	3	0	3	88000	1710	73	0	0.38	1	30.0947	0	1.16857	1.96667	2	1	0	0	0	0	0	0	FALSE	FALSE	TRUE	FALSE	FALSE	FALSE
91	114	77	37	99	100	96	4	11	22	1	21	93	107	77	30	20	0	0	0	2	62000	1640	63	1	0.3	0	23.0518	0	0.997308	1.03333	4	0	0	0	1	0	0	0	TRUE	FALSE	FALSE	FALSE	FALSE	TRUE
90	111	71	40	100	100	100	0	15	33	1	32	83	103	66	37	20	0	0	0	2	76000	1710	56	0	0.57	0	25.9909	1	1.00442	3.07	2	1	0	0	0	1	0	0	FALSE	FALSE	FALSE	FALSE	FALSE	FALSE
90	129	80	49	100	100	100	0	16	36	1	35	57	83	43	40	14	0	0	0	2	62000	1650	22	1	0.72	0	22.7732	1	1.03625	2.65	1	0	0	1	0	0	0	1	FALSE	FALSE	TRUE	FALSE	TRUE	FALSE
80	104	65	39	99	100	98	2	17	38	1	37	62	89	49	40	20	0	0	0	2	80000	1600	50	0	0.41	0	31.25	1	1.00411	1.93	2	0	0	0	0	0	0	0	FALSE	FALSE	TRUE	FALSE	FALSE	FALSE
64	70	59	11	99	100	99	1	27	54	1	53	78	103	72	31	30	0	0	0	1	82000	1750	81	1	0.78	0	26.7755	0	0.956608	2.04667	2	0	0	0	0	0	0	0	FALSE	FALSE	FALSE	FALSE	FALSE	FALSE
71	90	60	30	99	100	96	4	12	39	1	38	80	107	64	43	10	0	0	0	2	74000	1780	81	0	0.58	0	23.3556	0	0.954082	2.11667	2	0	0	0	0	0	1	0	FALSE	FALSE	FALSE	FALSE	FALSE	TRUE
101	110	93	17	99	100	87	13	7	24	1	23	78	126	56	70	9	0	0	0	2	67000	1700	71	0	0.45	0	23.1834	0	0.937292	1.69667	NA	NA	NA	NA	NA	NA	1	0	NA	TRUE	FALSE	FALSE	FALSE	TRUE
89	105	78	27	99	100	98	2	10	21	1	20	93	106	82	24	30	0	0	0	2	77000	1720	66	0	0.48	0	26.0276	0	0.96771	1.56667	3	1	0	0	0	1	1	0	TRUE	FALSE	FALSE	FALSE	FALSE	TRUE
98	114	89	25	99	100	89	11	11	20	1	19	94	116	82	34	50	0	0	0	2	94000	1600	51	1	0.4	0	36.7188	1	0.992566	1.88	2	1	0	0	0	0	1	0	FALSE	TRUE	FALSE	FALSE	FALSE	TRUE
72	88	63	25	99	100	99	1	14	23	2	21	70	86	46	40	30	0	0	0	2	64000	1680	66	0	0.47	0	22.6757	1	0.97742	2.71667	1	0	0	0	0	1	0	0	FALSE	FALSE	TRUE	FALSE	FALSE	FALSE
90	113	69	44	99	100	94	6	18	37	1	36	54	75	46	29	60	0	0	0	2	83000	1820	30	1	0.52	0	25.0574	0	1.17519	2.66667	3	0	0	0	0	NA	0	0	TRUE	FALSE	TRUE	FALSE	FALSE	FALSE
74	84	63	21	99	100	96	4	12	26	1	25	85	109	73	36	30	0	0	0	3	70000	1740	62	0	0.6	0	23.1206	0	0.906893	7.01667	3	1	0	0	0	0	0	0	TRUE	FALSE	FALSE	FALSE	FALSE	TRUE
67	74	59	15	97	100	93	7	5	30	1	29	81	88	72	16	10	0	0	0	2	64000	1630	53	0	0.5	0	24.0882	1	1.00637	2.12	2	1	0	0	0	0	1	0	FALSE	FALSE	FALSE	FALSE	FALSE	FALSE
89	100	62	38	98	100	92	8	21	35	1	34	92	156	54	102	75	0	0	0	2	74000	1560	55	0	0.59	0	30.4076	1	1.10372	3.08667	1	0	0	0	1	1	1	1	FALSE	FALSE	TRUE	FALSE	FALSE	TRUE
89	105	76	29	99	100	99	1	19	29	1	28	63	86	52	34	50	0	0	0	2	88000	1780	31	0	0.3	0	27.7743	0	0.996563	6.26667	1	0	0	0	0	0	0	0	FALSE	FALSE	TRUE	FALSE	FALSE	FALSE
97	113	85	28	96	100	91	9	18	37	1	36	87	108	70	38	50	0	0	0	2	68000	1510	68	1	0.72	0	29.8233	1	0.989947	1.63667	2	0	0	0	0	0	1	1	FALSE	FALSE	FALSE	FALSE	FALSE	TRUE
81	93	70	23	97	100	94	6	11	17	2	15	79	84	72	12	50	0	0	0	2	85000	1700	66	0	0.62	0	29.4118	0	1.01498	1.27	1	1	0	0	1	0	1	1	FALSE	FALSE	FALSE	FALSE	FALSE	FALSE
81	94	70	24	100	100	100	0	19	29	1	28	42	53	34	19	20	0	0	0	2	60000	1550	75	0	0.62	0	24.974	1	0.95836	1.6	2	1	0	0	0	0	0	0	FALSE	FALSE	TRUE	FALSE	FALSE	FALSE
60	65	59	6	88	98	82	16	15	25	1	24	56	83	39	44	20	50	0	0	2	90000	1820	74	1	1.33	3	27.1706	0	0.774761	2.35	1	0	0	0	0	NA	1	0	FALSE	TRUE	TRUE	FALSE	FALSE	FALSE
61	73	60	13	99	100	96	4	12	41	1	40	53	73	39	34	70	0	0	0	2	97000	1800	84	0	0.48	0	29.9383	0	0.968847	3.51667	1	0	0	1	0	0	1	1	FALSE	FALSE	TRUE	FALSE	FALSE	FALSE
83	94	70	24	99	100	98	2	15	24	1	23	97	121	88	33	50	0	0	0	2	74000	1730	67	0	0.47	0	24.7252	0	0.963095	2.71667	1	1	0	0	0	0	1	1	FALSE	FALSE	FALSE	FALSE	FALSE	TRUE
69	89	59	30	100	100	100	0	21	30	1	29	74	82	64	18	50	0	0	0	2	70000	1640	72	0	0.66	0	26.0262	1	0.966193	3.31333	1	0	0	1	0	0	0	1	FALSE	FALSE	FALSE	FALSE	FALSE	FALSE
64	72	58	14	100	100	100	0	9	25	2	23	73	123	56	67	50	0	0	0	2	80000	1700	64	0	0.38	0	27.6817	0	0.969567	2.26333	3	0	0	0	0	NA	0	1	TRUE	FALSE	FALSE	FALSE	FALSE	TRUE
65	77	62	15	99	100	99	1	13	23	2	21	80	98	73	25	50	0	0	0	2	78000	1750	74	0	0.42	0	25.4694	0	0.964262	1.65	1	1	1	0	0	0	0	1	FALSE	FALSE	FALSE	FALSE	FALSE	FALSE
83	92	74	18	97	100	93	7	18	28	1	27	77	91	55	36	50	0	0	0	2	97000	1640	55	0	0.36	0	36.0648	1	0.997908	2.06333	2	0	0	0	0	0	0	0	FALSE	FALSE	TRUE	FALSE	FALSE	FALSE
61	91	53	38	99	100	97	3	25	36	18	18	79	88	73	15	30	0	0	0	2	62000	1590	75	0	0.3	0	24.5243	1	0.957901	1.52	1	1	0	1	0	0	0	0	FALSE	FALSE	FALSE	FALSE	FALSE	FALSE
66	109	53	56	100	100	100	0	20	63	2	61	55	84	40	44	30	0	0	0.5	2	50000	1580	37	1	0.4	2	20.0288	1	0.451561	2.08667	1	0	0	0	0	NA	0	0	FALSE	FALSE	TRUE	FALSE	FALSE	FALSE
71	77	56	21	100	100	100	0	14	27	4	23	66	73	62	11	30	0	0	0	2	75000	1850	53	0	0.42	0	21.9138	0	0.959809	2.21667	1	0	0	0	0	0	0	0	FALSE	FALSE	FALSE	FALSE	FALSE	FALSE
76	88	66	22	99	100	95	5	12	39	1	38	62	73	54	19	40	0	0	0.5	2	53000	1600	25	1	0.33	2	20.7031	1	0.463535	2.11667	2	0	0	1	0	0	1	0	FALSE	FALSE	TRUE	FALSE	FALSE	FALSE
85	95	62	33	100	100	100	0	6	28	2	26	69	78	61	17	50	0	10	0	2	77000	1700	44	0	0.45	1	26.6436	0	1.11223	1.44667	2	0	0	0	0	NA	0	0	FALSE	FALSE	FALSE	FALSE	FALSE	FALSE
66	83	60	23	100	100	100	0	5	22	2	20	72	89	62	27	50	0	10	0	2	95000	1930	46	0	0.59	1	25.504	0	1.13637	3.05333	2	0	0	0	0	NA	0	0	FALSE	FALSE	FALSE	FALSE	FALSE	FALSE
65	101	55	46	99	100	92	8	11	26	2	24	61	86	51	35	50	0	10	0	2	103000	1870	38	0	0.61	1	29.4547	0	1.04079	4.11333	2	0	0	0	0	0	0	0	FALSE	FALSE	TRUE	FALSE	FALSE	FALSE
67	86	58	28	99	100	99	1	11	31	2	29	52	81	41	40	30	0	5	0	2	56000	1620	57	1	0.75	1	21.3382	1	1.40837	3.45	1	0	0	1	0	0	0	0	FALSE	FALSE	TRUE	FALSE	FALSE	FALSE
71	85	65	20	99	100	84	16	20	32	2	30	71	82	62	20	25	0	5	0	2	52000	1550	72	1	0.43	1	21.6441	1	1.4382	1.41667	2	0	1	0	0	0	0	0	FALSE	TRUE	FALSE	FALSE	FALSE	FALSE
72	85	67	18	100	100	100	0	14	19	1	18	54	68	50	18	40	0	0	0	2	93000	1800	50	0	0.69	0	28.7037	0	0.978527	3.43667	2	0	0	0	0	NA	0	0	FALSE	FALSE	TRUE	FALSE	FALSE	FALSE
62	81	58	23	99	100	56	44	10	66	1	65	61	89	47	42	30	0	0	0	2	63000	1670	61	1	0.63	0	22.5896	1	1.21217	2.75	3	1	0	0	0	0	0	0	TRUE	TRUE	TRUE	FALSE	FALSE	FALSE
71	81	58	23	100	100	100	0	14	18	1	17	57	70	49	21	40	0	0	0	2	83000	1800	42	0	0.69	0	25.6173	0	0.975794	4.25333	2	0	0	1	0	0	1	0	FALSE	FALSE	TRUE	FALSE	FALSE	FALSE
69	80	61	19	99	100	98	2	17	48	2	46	66	102	53	49	80	0	0	0	2	87000	1780	62	1	1.07	0	27.4587	1	0.969774	4.43667	3	0	0	0	1	0	0	1	TRUE	FALSE	TRUE	FALSE	FALSE	FALSE
72	93	63	30	99	100	96	4	15	33	2	31	73	110	52	58	40	0	0	0	2	74000	1780	69	1	0.6	0	23.3556	1	0.976117	3.10333	NA	0	0	0	0	0	0	0	NA	FALSE	TRUE	FALSE	FALSE	TRUE
72	83	46	37	99	100	96	4	18	28	2	26	90	107	75	32	50	0	0	0	3	90000	1800	62	0	0.4	0	27.7778	0	0.912268	2.48	3	1	0	0	0	0	0	0	TRUE	FALSE	FALSE	TRUE	FALSE	TRUE
93	102	87	15	98	100	96	4	13	31	1	30	68	78	60	18	50	0	0	0	3	90000	1750	65	0	0.58	0	29.3878	0	0.916331	2.28	3	1	0	0	0	0	0	1	TRUE	FALSE	FALSE	FALSE	FALSE	FALSE
75	82	75	7	98	100	91	9	9	32	1	31	61	105	47	58	50	0	0	0	2	113000	1670	65	1	0.82	0	40.5178	0	1.07118	1.75333	1	1	0	0	0	0	0	0	FALSE	FALSE	TRUE	FALSE	FALSE	TRUE
63	88	57	31	99	100	93	7	12	67	1	66	68	96	57	39	30	0	0	0.5	2	81000	1800	78	1	0.73	2	25	0	0.446781	2.93	2	1	0	0	0	0	1	1	FALSE	FALSE	FALSE	FALSE	FALSE	FALSE
66	88	53	35	100	100	100	0	14	27	1	26	57	72	39	33	40	0	0	0	2	64000	1600	59	1	0.45	0	25	1	0.992862	3.48333	2	0	1	0	0	0	0	0	FALSE	FALSE	TRUE	FALSE	FALSE	FALSE
68	89	59	30	99	100	99	1	13	26	2	24	76	102	66	36	27	0	0	0	2	73000	1700	68	0	0.47	0	25.2595	1	0.958552	2.1	3	0	0	0	0	0	0	1	TRUE	FALSE	FALSE	FALSE	FALSE	FALSE
75	97	42	55	99	100	98	2	16	27	2	25	48	74	38	36	35	0	0	0	2	84000	1920	57	0	0.46	0	22.7865	0	0.960299	2.23	2	0	0	0	0	0	0	1	FALSE	FALSE	TRUE	TRUE	FALSE	FALSE
71	85	53	32	97	100	91	9	5	11	1	10	57	81	49	32	50	15	0	0	2	100000	1720	71	0	0.45	3	33.8021	0	0.884278	4.15	2	0	0	0	0	1	0	0	FALSE	FALSE	TRUE	FALSE	FALSE	FALSE
69	89	60	29	99	100	83	17	11	24	2	22	79	98	71	27	40	20	0	0	2	86000	1830	53	1	0.73	3	25.6801	0	0.564415	3.43333	1	0	0	0	0	0	0	0	FALSE	TRUE	FALSE	FALSE	FALSE	FALSE
82	105	58	47	99	100	97	3	10	24	2	22	73	143	36	107	20	15	0	0	2	72000	1640	66	0	0.48	3	26.7698	1	0.999206	2.65	1	0	0	0	0	0	0	0	FALSE	FALSE	TRUE	FALSE	FALSE	TRUE
81	90	77	13	97	100	93	7	23	44	1	43	76	113	61	52	50	0	0	0	2	75000	1620	52	1	0.8	0	28.578	1	1.00131	1.87	2	1	0	0	0	1	0	1	FALSE	FALSE	FALSE	FALSE	FALSE	TRUE
66	86	49	37	98	100	96	4	16	36	1	35	57	70	46	24	50	0	0	0	2	64000	1890	50	1	0.57	0	17.9166	0	1.07092	0.533333	2	0	0	1	0	1	0	0	FALSE	FALSE	TRUE	TRUE	FALSE	FALSE
64	73	57	16	100	100	100	0	12	22	2	20	88	94	78	16	40	0	0	0	4	76000	1770	55	0	0.25	0	24.2587	0	0.969597	2.54667	1	0	0	0	0	0	1	0	FALSE	FALSE	FALSE	FALSE	FALSE	FALSE
80	88	74	14	99	100	99	1	18	25	6	19	94	131	75	56	30	0	0	0	2	74000	1690	58	0	0.27	0	25.9095	1	1.00258	2.43333	1	0	0	0	0	0	1	0	FALSE	FALSE	FALSE	FALSE	FALSE	TRUE
76	86	56	30	99	100	97	3	11	59	2	57	67	85	53	32	40	0	0	0	2	87000	1750	64	0	0.49	0	28.4082	1	0.989279	1.88667	1	0	0	0	0	1	1	0	FALSE	FALSE	TRUE	FALSE	FALSE	FALSE
73	113	65	48	99	100	98	2	16	48	2	46	74	98	62	36	70	0	0	0	2	77000	1690	57	1	0.75	0	26.9598	1	0.998616	1.92	1	0	0	0	0	0	1	0	FALSE	FALSE	FALSE	FALSE	FALSE	FALSE
77	98	66	32	97	100	79	21	16	35	1	34	85	111	73	38	75	0	0	0	2	95000	1800	63	1	0.63	0	29.321	0	1.06238	1.73333	1	0	0	0	0	0	1	0	FALSE	TRUE	FALSE	FALSE	FALSE	TRUE
75	97	64	33	100	100	100	0	14	27	2	25	65	78	56	22	30	20	0	0	3	57000	1700	34	0	0.38	3	19.7232	1	0.420809	2.73333	1	0	0	0	0	0	0	0	FALSE	FALSE	FALSE	FALSE	FALSE	FALSE
86	100	74	26	95	100	92	8	17	37	2	35	79	107	65	42	80	0	0	0	2	75000	1690	57	1	1.1	0	26.2596	0	1.17098	5.12	4	1	0	0	0	0	0	1	TRUE	FALSE	FALSE	FALSE	FALSE	TRUE
67	112	58	54	96	100	95	5	13	44	1	43	68	89	57	32	110	0	0	0	3	90000	1760	32	1	0.93	0	29.0548	0	1.0873	2.11667	2	0	0	0	0	1	0	0	FALSE	FALSE	FALSE	FALSE	FALSE	FALSE
65	76	61	15	99	100	93	7	12	16	1	15	78	95	61	34	35	0	0	0	2	94000	1650	49	0	0.6	0	34.5271	1	0.999836	3.00333	1	1	0	0	0	0	0	0	FALSE	FALSE	FALSE	FALSE	FALSE	FALSE
65	100	26	74	99	100	85	15	12	62	2	60	71	101	59	42	35	0	0	0	2	77000	1640	65	1	0.62	0	28.6288	1	0.991662	2.02	1	0	0	1	0	0	1	0	FALSE	TRUE	FALSE	TRUE	FALSE	FALSE
77	92	66	26	99	100	91	9	11	25	2	23	76	106	58	48	40	0	0	0	2	105000	1750	60	1	0.55	0	34.2857	0	1.06916	1.41667	1	0	0	0	0	0	1	0	FALSE	FALSE	FALSE	FALSE	FALSE	TRUE
91	139	80	59	98	100	91	9	17	38	1	37	84	138	65	73	50	0	0	0	2	78000	1600	43	1	0.62	0	30.4688	1	1.00004	2.11667	1	0	0	1	0	0	0	0	FALSE	FALSE	FALSE	FALSE	TRUE	TRUE
63	72	53	19	99	100	94	6	11	30	1	29	89	103	81	22	15	0	0	0	2	70000	1700	61	0	0.26	0	24.2215	1	0.992355	1.31333	1	1	1	0	0	0	0	0	FALSE	FALSE	FALSE	FALSE	FALSE	FALSE
93	123	83	40	99	100	99	1	23	38	1	37	85	104	69	35	59	0	0	0	2	104000	1700	43	1	0.56	0	35.9862	1	0.994477	3.96333	1	0	0	0	0	0	0	0	FALSE	FALSE	FALSE	FALSE	TRUE	FALSE
77	86	70	16	99	100	95	5	13	24	1	23	76	91	65	26	50	0	0	0	2	86000	1740	65	0	0.55	0	28.4053	0	1.01502	3.83667	1	0	0	0	1	0	0	0	FALSE	FALSE	FALSE	FALSE	FALSE	FALSE
72	79	67	12	99	100	97	3	10	23	1	22	75	92	61	31	25	0	0	0	2	75000	1680	53	0	0.4	0	26.5731	1	1.00551	3.29667	1	0	0	0	0	0	0	0	FALSE	FALSE	FALSE	FALSE	FALSE	FALSE
68	81	54	27	99	100	99	1	15	26	1	25	79	91	73	18	35	0	0	0	3	78000	1710	41	0	0.5	0	26.6749	0	1.0082	2.79667	1	0	0	0	0	1	0	0	FALSE	FALSE	FALSE	FALSE	FALSE	FALSE
65	91	59	32	100	100	100	0	16	23	1	22	70	82	62	20	50	0	0	0	2	88000	1820	50	0	0.47	0	26.5668	0	0.952992	3.58333	3	0	0	0	0	0	1	1	TRUE	FALSE	FALSE	FALSE	FALSE	FALSE
72	75	69	6	100	100	100	0	21	26	2	24	59	67	55	12	50	0	0	0	2	49000	1600	68	0	0.92	0	19.1406	1	0.969871	2.8	1	0	0	0	0	0	1	1	FALSE	FALSE	TRUE	FALSE	FALSE	FALSE
79	104	62	42	100	100	100	0	21	37	1	36	64	80	49	31	50	0	0	0	1	60000	1550	54	0	0.65	0	24.974	1	1.05353	2.12	3	0	0	1	0	0	0	0	TRUE	FALSE	TRUE	FALSE	FALSE	FALSE
84	97	76	21	99	100	96	4	15	31	2	29	92	112	68	44	50	0	0	0	2	85000	1650	78	0	0.93	0	31.2213	1	0.96891	1.7	2	0	0	0	0	0	1	1	FALSE	FALSE	FALSE	FALSE	FALSE	TRUE
55	65	52	13	100	100	100	0	24	39	2	37	79	109	59	50	50	0	0	0	2	64000	1700	67	0	0.35	0	22.1453	0	0.957146	3.90333	2	1	0	0	0	0	1	1	FALSE	FALSE	FALSE	FALSE	FALSE	TRUE
83	91	71	20	97	98	95	3	22	43	1	42	72	88	61	27	50	0	0	0	3	80000	1740	68	1	0.4	0	26.4236	0	1.08095	2.95333	2	1	0	0	0	1	0	0	FALSE	FALSE	FALSE	FALSE	FALSE	FALSE
62	99	55	44	97	99	92	7	18	46	5	41	81	109	62	47	50	0	0	0	2	63000	1620	83	1	0.5	0	24.0055	1	1.12092	1.85333	3	1	0	0	0	0	1	1	TRUE	FALSE	FALSE	FALSE	FALSE	TRUE
78	89	69	20	99	100	99	1	12	31	1	30	60	82	50	32	50	0	0	0	2	65000	1830	70	1	0.75	0	19.4094	0	1.02103	2.02	NA	0	0	1	0	1	0	0	NA	FALSE	TRUE	FALSE	FALSE	FALSE
85	101	75	26	100	100	100	0	15	35	1	34	90	114	78	36	30	0	0	0	2	74000	1670	53	0	0.26	0	26.5338	1	1.00552	1.99667	1	1	0	0	0	0	1	0	FALSE	FALSE	FALSE	FALSE	FALSE	TRUE
79	101	69	32	100	100	100	0	23	32	1	31	56	65	47	18	45	0	0	0	2	65000	1770	21	0	0.36	0	20.7476	1	1.06415	2.18	2	0	0	0	0	0	0	0	FALSE	FALSE	TRUE	FALSE	FALSE	FALSE
91	106	75	31	97	100	95	5	14	32	2	30	87	106	76	30	80	0	0	0	2	110000	1870	55	0	1.18	0	31.4564	0	1.01941	1.58	3	1	0	0	1	1	0	0	TRUE	FALSE	FALSE	FALSE	FALSE	TRUE
85	104	62	42	99	100	98	2	15	53	1	52	76	97	34	63	50	0	0	0	2	68000	1710	38	1	0.43	0	23.255	0	1.10126	2.61667	1	0	0	0	0	0	1	0	FALSE	FALSE	TRUE	FALSE	FALSE	FALSE
71	84	57	27	98	100	86	14	9	31	1	30	71	87	56	31	50	0	0	0	1	81000	1680	73	1	0.49	0	28.699	1	0.963417	1.92	2	1	0	1	0	0	1	0	FALSE	TRUE	FALSE	FALSE	FALSE	FALSE
88	117	56	61	99	100	97	3	12	31	1	30	86	94	75	19	50	0	0	0	2	76000	1650	70	0	0.58	0	27.9155	1	0.972848	1.73	1	0	0	0	0	0	1	0	FALSE	FALSE	FALSE	FALSE	FALSE	FALSE
62	74	55	19	100	100	100	0	17	43	1	42	72	99	62	37	50	0	0	0	2	76000	1700	66	0	0.59	0	26.2976	0	0.967313	1.57	1	1	0	1	0	0	0	0	FALSE	FALSE	FALSE	FALSE	FALSE	FALSE
72	81	53	28	97	99	93	6	12	25	1	24	79	91	60	31	42	0	0	0.5	3	93000	1640	59	0	0.49	2	34.5776	1	1.09957	1.57	NA	1	0	0	0	0	0	0	NA	FALSE	FALSE	FALSE	FALSE	FALSE
70	89	46	43	99	100	96	4	20	29	1	28	61	76	52	24	36	0	0	0	3	80000	1700	55	0	0.57	0	27.6817	1	0.924047	2.45	4	0	0	0	0	0	0	0	TRUE	FALSE	TRUE	TRUE	FALSE	FALSE
79	90	76	14	100	100	100	0	19	26	1	25	71	86	63	23	36	0	0	0	2	75000	1500	69	0	0.5	0	33.3333	1	0.979999	2.01667	3	0	0	0	0	0	0	1	TRUE	FALSE	FALSE	FALSE	FALSE	FALSE
[truncated: 1,254 more rows]
